# Supplementary material for: Rh-catalyzed alkoxycarbonylation of unactivated alkyl chlorides
Source: Royal Society of Chemistry journal article supplement (doi:10.1039/d2sc04103k), 2022-01-01

## Supporting Information

### Rh-Catalyzed Alkoxy carbonylation of Unactivated Alkyl Chlorides

Peng Wang, Yaxin Wang, Helfried Neumann\*, Matthias Beller\*

#### Table of Contents

1. Supplement to the experiments
2. NMR data for the main products

#### Supplement to the experiments

##### 1.1 Reagents and analysis

The chemical reagents were purchased from ABCR Chemicals, TCI Chemicals, FlouroChem, Merck Chemicals and were used as received. The  $^1\text{H}$  NMR and  $^{13}\text{C}$  NMR spectra were recorded on a Bruker 300 spectrometer. Chemical shifts  $\delta$  (ppm) are given relative to solvent: references for  $\text{CDCl}_3$  are 7.26 ppm ( $^1\text{H}$  NMR) and 77.16 ppm ( $^{13}\text{C}$  NMR), references for *d*-DMSO are 2.50 ppm ( $^1\text{H}$  NMR) and 39.50 ppm ( $^{13}\text{C}$  NMR), references for  $\text{CD}_3\text{OH}$  are 3.31 ppm ( $^1\text{H}$  NMR) and 49.00 ppm ( $^{13}\text{C}$  NMR). Multiplets are assigned as s (singlet), d (doublet), t (triplet), q (quartet), dd (doublet of doublet), m (multiplet). Conversion and selectivity are determined by Agilent 6890N Gas chromatography (GC) and Agilent 5973 Network GC-MS, using splitless injection and FID detector (column: HP-5 (30 m  $\times$  320  $\mu\text{m}$   $\times$  0.25  $\mu\text{m}$ ); inlet temperature: 250  $^\circ\text{C}$ ; starting oven temperature: 50  $^\circ\text{C}$ ; rate: 8  $^\circ\text{C}/\text{min}$ ; final temperature: 260  $^\circ\text{C}$ , carrier gas:  $\text{N}_2$  25 mL/min).

##### 1.2 General procedures for alkoxy carbonylation of alkyl chlorides

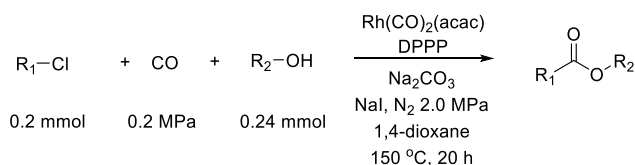

In a typical experiment, 2-chloroethylbenzene or other unactivated alkyl chlorides (0.2 mmol),  $\text{Rh}(\text{acac})(\text{CO})_2$  (0.01 mmol), phosphine ligand (0.06 mmol in case of monophosphine ligand or 0.03 mmol in case of bisphosphine ligand),  $\text{NaI}$  (0.20 mmol), the respective alcohol or phenol (0.2 mmol) and  $\text{Na}_2\text{CO}_3$  (0.24 mmol) were dissolved sequentially in 1,4-dioxane (0.5 mL) in a 50 mL stainless steel autoclave. The obtained mixture was purged with  $\text{CO}$  (0.2 MPa) for three times and pressured to 0.2 MPa; then,  $\text{N}_2$  was flushed into the reactor (2.0 MPa). In order to prevent the solvent from being ejected from the reaction system, 2.0 MPa  $\text{N}_2$  is needed. The reaction mixture was stirred at the appointed temperature for 20 h. Upon completion, the autoclave was cooled down to room temperature and depressurized carefully. The reaction solution was analyzed by GC and GC-MS to determine the conversion and the chemical selectivity (*n*-dodecane (C12) as internal standard). The purified product was obtained after column chromatography and  $^1\text{H}$  NMR and  $^{13}\text{C}$  NMR spectroscopy were used to identify the structure of the products.

### 1.3 General procedure for alkoxycarbonylation of chloromethane and dichloromethane

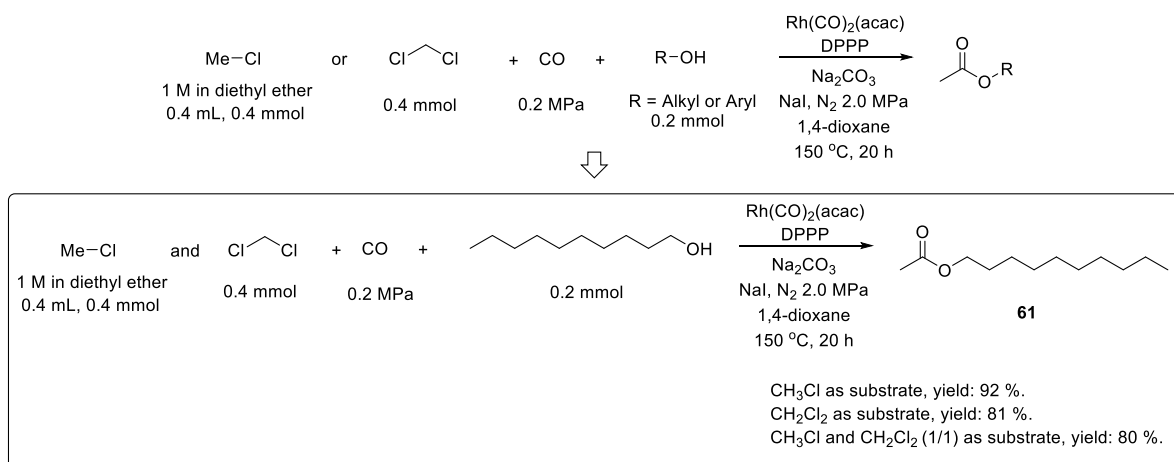

In a typical experiment chloromethane or dichloromethane (0.4 mmol), Rh(acac)(CO)<sub>2</sub> (0.01 mmol), DPPP (0.03 mmol), NaI (0.20 mmol), the respective alcohol or phenol (0.2 mmol) and Na<sub>2</sub>CO<sub>3</sub> (0.24 mmol) were dissolved sequentially in 1,4-dioxane (0.5 mL) in a 50 mL stainless steel autoclave. The obtained mixture was purged with CO (0.2 MPa) for three times and pressured to 0.2 MPa; then, N<sub>2</sub> was flushed into the reactor (2.0 MPa). In order to prevent the solvent from being ejected from the reaction system, 2.0 MPa N<sub>2</sub> is needed. The reaction mixture was stirred at 150 °C for 20 h. Upon completion of the reaction, the autoclave was cooled down to room temperature and depressurized carefully. The reaction solution was analyzed by GC and GC-MS to determine the conversion and the chemical selectivity (*n*-dodecane as internal standard). The product yield was determined after column chromatography and <sup>1</sup>H NMR and <sup>13</sup>C NMR spectroscopy were used to identify the structure of the products. Because CH<sub>3</sub>Cl and CH<sub>2</sub>Cl<sub>2</sub> are highly volatile and have low boiling points, an excess amount of them is needed and the yield is based on the respective alcohol or phenol.

For the mixture of chloromethane and dichloromethane, the experimental procedure is as follows: chloromethane and dichloromethane (1/1 ratio, 0.4 mmol in total), Rh(acac)(CO)<sub>2</sub> (0.01 mmol), DPPP (0.03 mmol), NaI (0.20 mmol), 1-decanol (0.2 mmol) and Na<sub>2</sub>CO<sub>3</sub> (0.24 mmol) were dissolved in 1,4-dioxane (0.5 mL) in a 50 mL stainless steel autoclave. The obtained mixture was purged with CO (0.2 MPa) for three times and pressured to 0.2 MPa. Then, N<sub>2</sub> was flushed into the reactor (2.0 MPa). The reaction mixture was stirred at 150 °C for 20 h. Upon completion, the autoclave was cooled down to room temperature and depressurized carefully. The products were separated by column chromatography and <sup>1</sup>H NMR and <sup>13</sup>C NMR were used to identify the structure of **61** (see below).

### 1.4 General procedure for alkoxycarbonylation of chloroform and tetrachloromethane

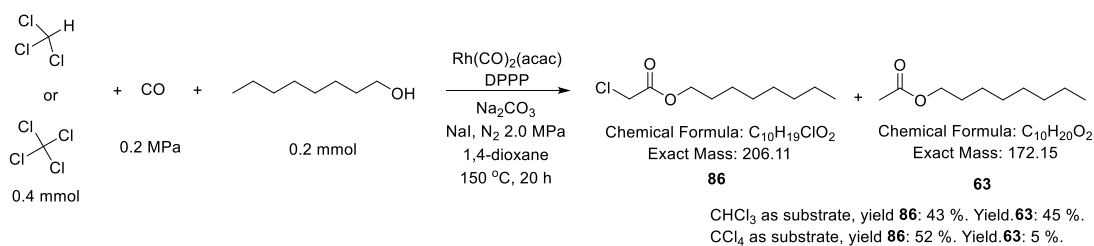

In a typical experiment, chloroform or tetrachloromethane (0.4 mmol), Rh(acac)(CO)<sub>2</sub> (0.01 mmol), DPPP (0.03 mmol), NaI (0.20 mmol), 1-octanol (0.2 mmol) and Na<sub>2</sub>CO<sub>3</sub> (0.24 mmol) were dissolved sequentially in 1,4-dioxane (0.5 mL) in a 50 mL stainless steel autoclave. The obtained mixture was purged with CO (0.2 MPa) for three times and pressured to 0.2 MPa; then, N<sub>2</sub> was flushed into the reactor (2.0 MPa). In order to prevent the solvent from being ejected from the reaction system, 2.0 MPa N<sub>2</sub> is needed. The reaction mixture was stirred at 150 °C for 20 h. Upon completion of the reaction, the autoclave was cooled down to room temperature and depressurized carefully. The crude reaction solution was analyzed by GC and GC-MS (for **63** see below). Apart from other products octyl acetate and octyl chloroacetate were detected (*n*-dodecane as internal standard).

GC-MS spectra of the crude reaction mixture of the alkoxycarbonylation of chloroform:

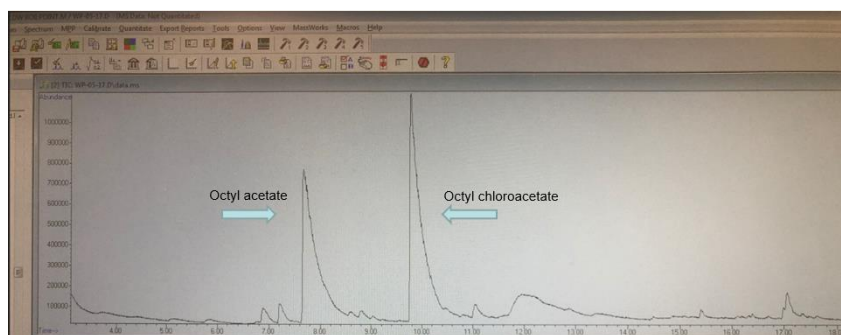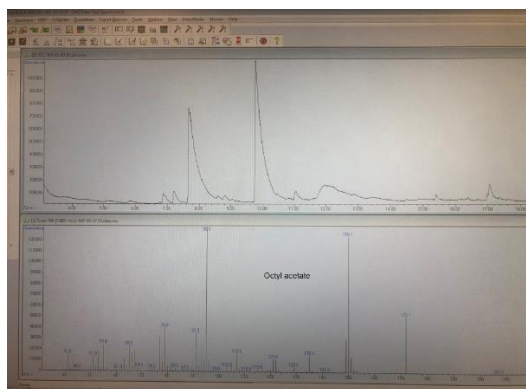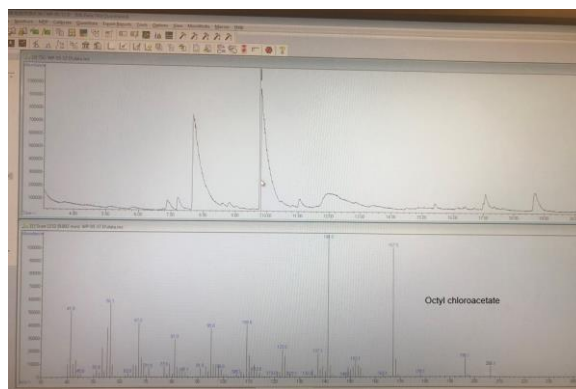

Agilent 5973 Network GC-MS, using splitless injection and FID detector (column: HP-5 (30 m × 250  $\mu$ m × 0.25  $\mu$ m); inlet temperature: 250  $^{\circ}$ C; starting oven temperature: 50  $^{\circ}$ C; rate: 10  $^{\circ}$ C/min; final temperature: 300  $^{\circ}$ C, carrier gas: He 1.2 mL/min).

Control experiments:

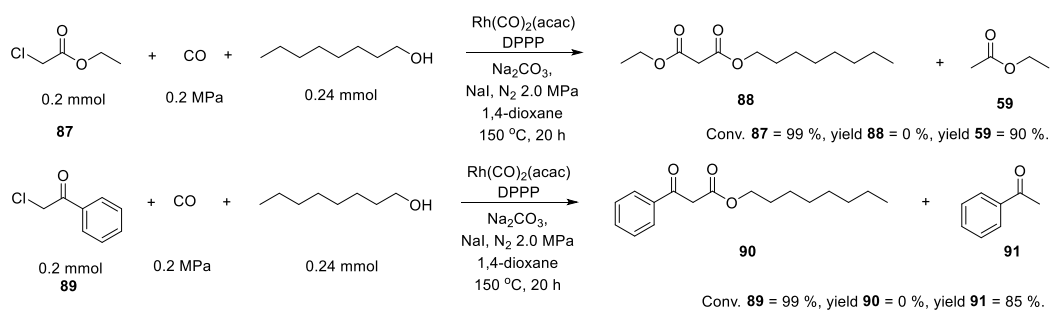

## 1.5 Supplement to Alkoxy carbonylation of Alkyl Chlorides

All metal precursors, additives and solvents which were used are commercially available.

**Table S1.** Alkoxy carbonylation of (2-chloroethyl)benzene with different metal precursors, additives, bases and solvents <sup>a</sup>

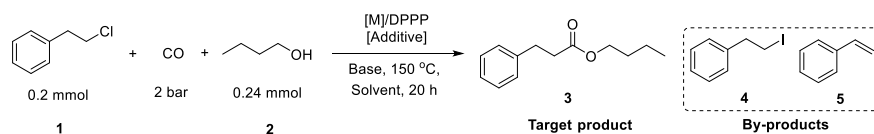

| Entry | Rh-precursor                       | Base<br>(1.2 e.q.)              | Additive<br>(1.0 e.q.)        | Solvent<br>(0.5 mL) | Conv.<br>(%) <sup>b</sup> | Sel. <sub>3</sub><br>(%) <sup>b</sup> |
|-------|------------------------------------|---------------------------------|-------------------------------|---------------------|---------------------------|---------------------------------------|
| 1     | Rh(acac)(CO) <sub>2</sub>          | Na <sub>2</sub> CO <sub>3</sub> | NaI                           | 1,4-dioxane         | 99                        | 91                                    |
| 2     | [Rh(cod)Cl] <sub>2</sub>           | Na <sub>2</sub> CO <sub>3</sub> | NaI                           | 1,4-dioxane         | 99                        | 80                                    |
| 3     | Pd(OAc) <sub>2</sub>               | Na <sub>2</sub> CO <sub>3</sub> | NaI                           | 1,4-dioxane         | 99                        | 6                                     |
| 4     | Ru <sub>3</sub> (CO) <sub>12</sub> | Na <sub>2</sub> CO <sub>3</sub> | NaI                           | 1,4-dioxane         | 99                        | 12                                    |
| 5     | Pd <sub>2</sub> (dba) <sub>3</sub> | Na <sub>2</sub> CO <sub>3</sub> | NaI                           | 1,4-dioxane         | 99                        | 3                                     |
| 6     | Rh(acac)(CO) <sub>2</sub>          | Na <sub>2</sub> CO <sub>3</sub> | NaCl                          | 1,4-dioxane         | 99                        | 0                                     |
| 7     | Rh(acac)(CO) <sub>2</sub>          | Na <sub>2</sub> CO <sub>3</sub> | NaBr                          | 1,4-dioxane         | 99                        | 3                                     |
| 8     | Rh(acac)(CO) <sub>2</sub>          | Na <sub>2</sub> CO <sub>3</sub> | KI                            | 1,4-dioxane         | 99                        | 62                                    |
| 9     | Rh(acac)(CO) <sub>2</sub>          | Na <sub>2</sub> CO <sub>3</sub> | <i>n</i> -Bu <sub>4</sub> NBr | 1,4-dioxane         | 99                        | 2                                     |
| 10    | Rh(acac)(CO) <sub>2</sub>          | Na <sub>2</sub> CO <sub>3</sub> | <i>n</i> -Bu <sub>4</sub> NCl | 1,4-dioxane         | 99                        | 0                                     |
| 11    | Rh(acac)(CO) <sub>2</sub>          | Na <sub>2</sub> CO <sub>3</sub> | KOAc                          | 1,4-dioxane         | 99                        | 0                                     |
| 12    | Rh(acac)(CO) <sub>2</sub>          | K <sub>2</sub> CO <sub>3</sub>  | NaI                           | 1,4-dioxane         | 99                        | 73                                    |
| 13    | Rh(acac)(CO) <sub>2</sub>          | <i>t</i> BuOK                   | NaI                           | 1,4-dioxane         | 99                        | 6                                     |
| 14    | Rh(acac)(CO) <sub>2</sub>          | Et <sub>3</sub> N               | NaI                           | 1,4-dioxane         | 99                        | 16                                    |
| 15    | Rh(acac)(CO) <sub>2</sub>          | Bu <sub>3</sub> N               | NaI                           | 1,4-dioxane         | 99                        | 14                                    |
| 16    | Rh(acac)(CO) <sub>2</sub>          | TBEA                            | NaI                           | 1,4-dioxane         | 99                        | 5                                     |
| 17    | Rh(acac)(CO) <sub>2</sub>          | TMEDA                           | NaI                           | 1,4-dioxane         | 99                        | 0                                     |
| 18    | Rh(acac)(CO) <sub>2</sub>          | Na <sub>2</sub> CO <sub>3</sub> | NaI                           | Cyclohexane         | 99                        | 24                                    |
| 19    | Rh(acac)(CO) <sub>2</sub>          | Na <sub>2</sub> CO <sub>3</sub> | NaI                           | THF                 | 99                        | 65                                    |
| 20    | Rh(acac)(CO) <sub>2</sub>          | Na <sub>2</sub> CO <sub>3</sub> | NaI                           | Toluene             | 72                        | 11                                    |
| 21    | Rh(acac)(CO) <sub>2</sub>          | Na <sub>2</sub> CO <sub>3</sub> | NaI                           | DMSO                | 99                        | 0                                     |
| 22    | Rh(acac)(CO) <sub>2</sub>          | Na <sub>2</sub> CO <sub>3</sub> | NaI                           | DMF                 | 97                        | 0                                     |
| 23    | Rh(acac)(CO) <sub>2</sub>          | Na <sub>2</sub> CO <sub>3</sub> | NaI                           | DMAc                | 99                        | 0                                     |
| 24    | Rh(acac)(CO) <sub>2</sub>          | Na <sub>2</sub> CO <sub>3</sub> | NaI                           | CH <sub>3</sub> CN  | 99                        | 47                                    |

<sup>a</sup> (2-Chloroethyl)benzene (0.2 mmol), *n*-butanol 0.24 mmol (1.2 e.q.), [M] 5 mol%, S/Rh mol ratio = 20, DPPP 15 mol%, [Rh]/P-ligand molar ratio = 1/6, Base 0.24 mmol (1.2 e.q.), additive 0.20 mmol (1.0 e.q.), CO = 2 bar, N<sub>2</sub> 20 bar; 150 °C, Solvent 0.5 mL, time 20 h. <sup>b</sup> Determined by GC and GC-MS, dodecane (C<sub>12</sub>) as internal standard.

**Table S2.** Alkoxy carbonylation of (2-chloroethyl)benzene with phenol using different metal precursors and additives <sup>a</sup>

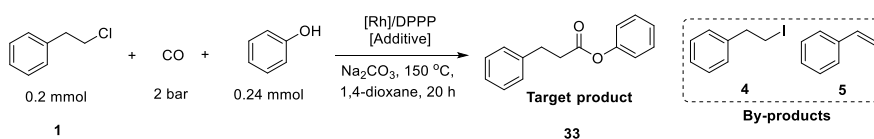

| Entry           | Rh-precursor                       | Base<br>(1.0 e.q.)              | Additive<br>(1.0 e.q.) | Solvent<br>(0.5 mL) | Conv.<br>(%) <sup>b</sup> | Sel. <sub>33</sub><br>(%) <sup>b</sup> |
|-----------------|------------------------------------|---------------------------------|------------------------|---------------------|---------------------------|----------------------------------------|
| 1 <sup>c</sup>  | Rh(acac)(CO) <sub>2</sub>          | Na <sub>2</sub> CO <sub>3</sub> | NaI                    | 1,4-dioxane         | 99                        | 94                                     |
| 2               | [Rh(cod)Cl] <sub>2</sub>           | Na <sub>2</sub> CO <sub>3</sub> | NaI                    | 1,4-dioxane         | 99                        | 91                                     |
| 3               | Pd(OAc) <sub>2</sub>               | Na <sub>2</sub> CO <sub>3</sub> | NaI                    | 1,4-dioxane         | 99                        | 13                                     |
| 4               | Ru <sub>3</sub> (CO) <sub>12</sub> | Na <sub>2</sub> CO <sub>3</sub> | NaI                    | 1,4-dioxane         | 99                        | 15                                     |
| 5               | Pd <sub>2</sub> (dba) <sub>3</sub> | Na <sub>2</sub> CO <sub>3</sub> | NaI                    | 1,4-dioxane         | 99                        | 4                                      |
| 11 <sup>d</sup> | Rh(acac)(CO) <sub>2</sub>          | Na <sub>2</sub> CO <sub>3</sub> | NaI                    | 1,4-dioxane         | 99                        | 75                                     |
| 12 <sup>e</sup> | Rh(acac)(CO) <sub>2</sub>          | Na <sub>2</sub> CO <sub>3</sub> | NaI                    | 1,4-dioxane         | 99                        | 29                                     |
| 13              | Rh(acac)(CO) <sub>2</sub>          | Na <sub>2</sub> CO <sub>3</sub> | NaCl                   | 1,4-dioxane         | 99                        | 0                                      |
| 14              | Rh(acac)(CO) <sub>2</sub>          | Na <sub>2</sub> CO <sub>3</sub> | NaBr                   | 1,4-dioxane         | 99                        | 14                                     |
| 15              | Rh(acac)(CO) <sub>2</sub>          | Na <sub>2</sub> CO <sub>3</sub> | TBAB                   | 1,4-dioxane         | 99                        | 0                                      |
| 16              | Rh(acac)(CO) <sub>2</sub>          | Na <sub>2</sub> CO <sub>3</sub> | TBACl                  | 1,4-dioxane         | 99                        | 0                                      |
| 17              | Rh(acac)(CO) <sub>2</sub>          | Na <sub>2</sub> CO <sub>3</sub> | KOAc                   | 1,4-dioxane         | 99                        | 0                                      |

<sup>a</sup> (2-Chloroethyl)benzene (0.2 mmol), phenol 0.24 mmol (1.2 e.q.), [Rh] 5 mol%, S/Rh mol ratio = 20, DPPP 15 mol%, [Rh]/P-ligand molar ratio = 1/6, Na<sub>2</sub>CO<sub>3</sub> 0.24 mmol (1.2 e.q.), additive 0.20 mmol (1.0 e.q.), CO = 2 bar, N<sub>2</sub> 20 bar; 150 °C, 1,4-dioxane 0.5 mL, time 20 h. <sup>b</sup> Determined by GC and GC-MS, dodecane (C<sub>12</sub>) as internal standard. <sup>c</sup> Isolated yield is 87 % for entry 1. <sup>d</sup> [Rh] 2.5 % mmol, S/Rh mol ratio = 40, P-ligand 7.5 mol%, [Rh]/P-ligand molar ratio = 1/6. <sup>e</sup> [Rh] 1 mol%, S/Rh mol ratio = 100, P-ligand 3 mol%, [Rh]/P-ligand molar ratio = 1/6.

**Scheme S1.**  $\beta$ -Elimination of HX (X = Cl, I) from (2-chloroethyl)benzene and 1-iodo-2-phenylethane.

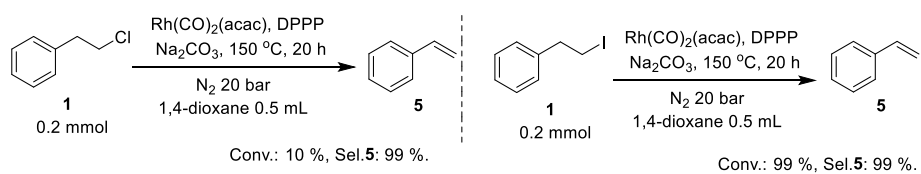

## NMR data of the main products

Column chromatography for product separation were performed according to references [1-9].

### Butyl 3-phenylpropanoate (3)

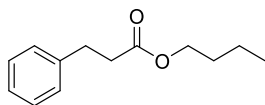

$^1\text{H}$  NMR (300 MHz,  $\text{CDCl}_3$ )  $\delta$  7.36-7.17 (m, 5H), 4.10 (t,  $J = 6.7$  Hz, 2H), 3.02-2.92 (m, 2H), 2.71-2.60 (m, 2H), 1.64-1.55 (m, 2H), 1.44-1.31 (m, 2H), 0.94 (t,  $J = 7.3$  Hz, 3H).

$^{13}\text{C}$  NMR (75 MHz,  $\text{CDCl}_3$ )  $\delta$  173.04, 140.59, 128.48, 128.29, 126.23, 64.36, 35.95, 31.02, 30.67, 19.11, 13.70.

### Methyl 3-phenylpropanoate (6)

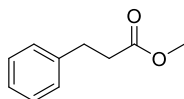

$^1\text{H}$  NMR (300 MHz,  $\text{CDCl}_3$ )  $\delta$  7.40-7.19 (m, 5H), 3.71 (s, 3H), 3.01 (t,  $J = 7.8$  Hz, 2H), 2.74-2.63 (m, 2H).

$^{13}\text{C}$  NMR (75 MHz,  $\text{CDCl}_3$ )  $\delta$  173.34, 140.56, 128.55, 128.32, 126.31, 51.62, 35.73, 30.98.

### Ethyl 3-phenylpropanoate (7)

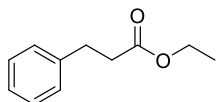

$^1\text{H}$  NMR (300 MHz,  $\text{CDCl}_3$ )  $\delta$  7.39-7.20 (m, 5H), 4.17 (q,  $J = 7.1$  Hz, 2H), 3.00 (t,  $J = 7.8$  Hz, 2H), 2.73-2.62 (m, 2H), 1.28 (t,  $J = 7.2$  Hz, 3H).

$^{13}\text{C}$  NMR (75 MHz,  $\text{CDCl}_3$ )  $\delta$  172.91, 140.63, 128.51, 128.34, 126.27, 60.42, 35.98, 31.02, 14.24.

### Propyl 3-phenylpropanoate (8)

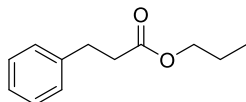

$^1\text{H}$  NMR (300 MHz,  $\text{CDCl}_3$ )  $\delta$  7.22-7.08 (m, 5H), 3.96 (t,  $J = 6.7$  Hz, 2H), 2.89 (t,  $J = 7.8$  Hz, 2H), 2.60-2.51 (m, 2H), 1.63-1.47 (m, 4H), 0.84 (t,  $J = 7.4$  Hz, 3H).

$^{13}\text{C}$  NMR (75 MHz,  $\text{CDCl}_3$ )  $\delta$  173.05, 140.59, 128.49, 128.30, 126.24, 66.10, 35.95, 31.02, 21.97, 10.37.

### Octyl 3-phenylpropanoate (9)

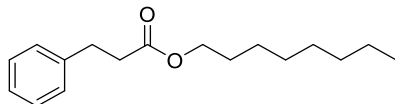

$^1\text{H}$  NMR (300 MHz,  $\text{CDCl}_3$ )  $\delta$  7.26-7.08 (m, 5H), 3.99 (t,  $J = 6.7$  Hz, 2H), 2.88 (dd,  $J = 8.5, 7.1$  Hz, 2H), 2.61-2.49 (m, 2H), 1.56-1.49 (m, 2H), 1.26-1.10 (m, 10H), 0.87-0.77 (m, 3H).

$^{13}\text{C}$  NMR (75 MHz,  $\text{CDCl}_3$ )  $\delta$  173.05, 140.60, 128.49, 128.30, 126.24, 64.69, 35.96, 31.79, 31.02, 29.22, 29.19, 28.62, 25.91, 22.66, 14.11.

### Decyl 3-phenylpropanoate (10)

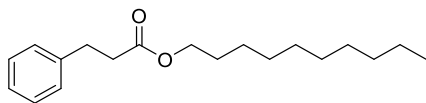

$^1\text{H}$  NMR (300 MHz,  $\text{CDCl}_3$ )  $\delta$  7.38-7.16 (m, 5H), 4.09 (t,  $J = 6.7$  Hz, 2H), 2.98 (t,  $J = 7.8$  Hz, 2H), 2.71-2.60 (m, 2H), 1.66-1.57 (m, 2H), 1.31 (d,  $J = 6.5$  Hz, 14H), 0.96-0.86 (m, 3H).

$^{13}\text{C}$  NMR (75 MHz,  $\text{CDCl}_3$ )  $\delta$  173.04, 140.60, 128.49, 128.30, 126.24, 64.68, 35.96, 31.91, 31.03, 29.55, 29.53, 29.33, 29.27, 28.63, 25.92, 22.70,

14.14.

Cyclobutylmethyl 3-phenylpropanoate (**11**)

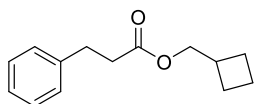

$^1\text{H NMR}$  (300 MHz,  $\text{CDCl}_3$ )  $\delta$  7.36–7.19 (m, 5H), 4.07 (d,  $J = 6.8$  Hz, 2H), 3.03–2.95 (m, 2H), 2.73–2.55 (m, 3H), 2.06–1.66 (m, 6H).

$^{13}\text{C NMR}$  (75 MHz,  $\text{CDCl}_3$ )  $\delta$  173.13, 140.59, 128.48, 128.29, 126.24, 68.32, 35.91, 34.07, 31.04, 24.73, 18.40.

Cyclohexylmethyl 3-phenylpropanoate (**12**)

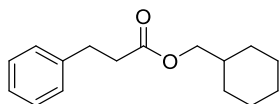

$^1\text{H NMR}$  (300 MHz,  $\text{CDCl}_3$ )  $\delta$  7.26–7.06 (m, 5H), 3.81 (d,  $J = 6.5$  Hz, 2H), 2.88 (t,  $J = 7.8$  Hz, 2H), 2.60–2.52 (m, 2H), 1.74–1.42 (m, 7H), 1.19–1.09 (m, 2H), 0.93–0.77 (m, 2H).

$^{13}\text{C NMR}$  (75 MHz,  $\text{CDCl}_3$ )  $\delta$  173.07, 140.58, 128.49, 128.30, 126.23, 69.67, 37.08, 35.95, 31.06, 29.64, 26.36, 25.68.

Phenethyl 3-phenylpropanoate (**13**)

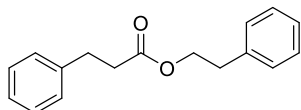

$^1\text{H NMR}$  (300 MHz,  $\text{CDCl}_3$ )  $\delta$  7.28–7.06 (m, 10H), 4.22 (t,  $J = 7.0$  Hz, 2H), 2.91–2.79 (m, 4H), 2.58–2.49 (m, 2H).

$^{13}\text{C NMR}$  (75 MHz,  $\text{CDCl}_3$ )  $\delta$  172.85, 140.50, 137.82, 128.92, 128.51, 128.30, 126.57, 126.27, 64.96, 35.91, 35.10, 30.93.

Benzyl 3-phenylpropanoate (**14**)

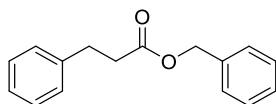

$^1\text{H NMR}$  (300 MHz,  $\text{CDCl}_3$ )  $\delta$  7.41–7.22 (m, 10H), 5.16 (s, 2H), 3.06–2.97 (m, 2H), 2.77–2.66 (m, 2H).

$^{13}\text{C NMR}$  (75 MHz,  $\text{CDCl}_3$ )  $\delta$  172.76, 140.42, 135.92, 128.57, 128.52, 128.32, 128.29, 128.23, 126.29, 66.31, 35.92, 30.96.

4-Fluorobenzyl 3-phenylpropanoate (**15**)

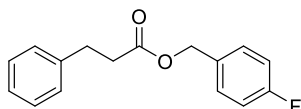

$^1\text{H NMR}$  (300 MHz,  $\text{CDCl}_3$ )  $\delta$  7.34–7.28 (m, 4H), 7.24–7.20 (m, 3H), 7.06 (t,  $J = 8.7$  Hz, 2H), 5.10 (d,  $J = 0.7$  Hz, 2H), 3.00 (t,  $J = 7.7$  Hz, 2H), 2.76–2.67 (m, 2H).

$^{13}\text{C NMR}$  (75 MHz,  $\text{CDCl}_3$ )  $\delta$  172.68, 140.33, 130.28, 130.17, 128.92, 128.53, 128.51, 128.31, 126.31, 115.61, 115.33, 65.56, 35.87, 30.94.

$^{19}\text{F NMR}$  (282 MHz,  $\text{CDCl}_3$ )  $\delta$  -113.72.

3,4-Dimethoxybenzyl 3-phenylpropanoate (**16**)

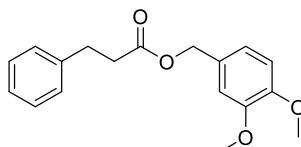

$^1\text{H NMR}$  (300 MHz,  $\text{CDCl}_3$ )  $\delta$  7.31–7.18 (m, 5H), 6.95–6.83 (m, 3H), 5.07 (d,  $J = 0.6$  Hz, 2H), 3.90 (d,  $J = 4.3$  Hz, 6H), 2.99 (dd,  $J = 8.3, 7.2$  Hz, 2H), 2.75–2.65 (m, 2H).

$^{13}\text{C NMR}$  (75 MHz,  $\text{CDCl}_3$ )  $\delta$  172.81, 149.12, 148.98, 140.44, 128.49, 128.44, 128.31, 126.27, 121.32, 111.81, 111.00, 66.43, 55.94, 55.89, 35.94.

30.95.

3,5-Dimethoxybenzyl 3-phenylpropanoate (**17**)

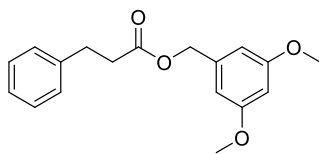

$^1\text{H NMR}$  (300 MHz,  $\text{CDCl}_3$ )  $\delta$  7.34–7.18 (m, 5H), 6.51–6.41 (m, 3H), 5.07 (d,  $J = 0.6$  Hz, 2H), 3.81 (s, 6H), 3.01 (dd,  $J = 8.5, 7.1$  Hz, 2H), 2.76–2.68 (m, 2H).

$^{13}\text{C NMR}$  (75 MHz,  $\text{CDCl}_3$ )  $\delta$  172.68, 160.93, 140.42, 138.15, 128.52, 128.31, 126.30, 105.98, 100.17, 66.23, 55.38, 35.90, 30.94.

3,4,5-Trimethoxybenzyl 3-phenylpropanoate (**18**)

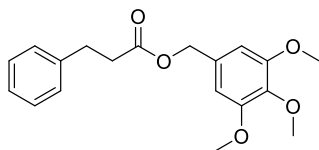

$^1\text{H NMR}$  (300 MHz,  $\text{CDCl}_3$ )  $\delta$  7.24–7.09 (m, 5H), 6.47 (s, 2H), 4.96 (s, 2H), 3.77 (d,  $J = 1.2$  Hz, 9H), 2.91 (t,  $J = 7.7$  Hz, 2H), 2.66–2.57 (m, 2H).

$^{13}\text{C NMR}$  (75 MHz,  $\text{CDCl}_3$ )  $\delta$  172.74, 153.31, 140.38, 137.95, 131.47, 128.51, 128.31, 126.31, 105.54, 66.59, 60.85, 56.14, 35.89, 30.93.

Benzo[d][1,3]dioxol-5-ylmethyl 3-phenylpropanoate (**19**)

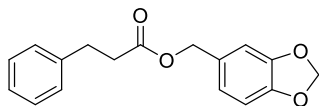

$^1\text{H NMR}$  (300 MHz,  $\text{CDCl}_3$ )  $\delta$  7.35–7.16 (m, 5H), 6.85–6.77 (m, 3H), 5.99 (s, 2H), 5.03 (s, 2H), 2.99 (dd,  $J = 8.5, 7.1$  Hz, 2H), 2.73–2.64 (m, 2H).

$^{13}\text{C NMR}$  (75 MHz,  $\text{CDCl}_3$ )  $\delta$  172.75, 147.79, 147.63, 140.40, 129.68, 128.52, 128.31, 126.29, 122.30, 109.06, 108.24, 101.17, 66.29, 35.93, 30.95.

4-(Benzyloxy)benzyl 3-phenylpropanoate (**20**)

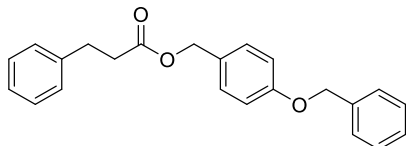

$^1\text{H NMR}$  (300 MHz,  $\text{CDCl}_3$ )  $\delta$  7.51–7.16 (m, 13H), 7.04–6.94 (m, 2H), 5.09 (d,  $J = 8.0$  Hz, 4H), 2.99 (t,  $J = 7.8$  Hz, 2H), 2.75–2.63 (m, 2H).

$^{13}\text{C NMR}$  (75 MHz,  $\text{CDCl}_3$ )  $\delta$  172.82, 158.83, 140.47, 136.87, 130.10, 128.64, 128.51, 128.36, 128.32, 128.04, 127.46, 126.26, 114.89, 70.05, 66.10, 35.96, 30.97.

4-((4-(Trifluoromethyl)benzyl)oxy)benzyl 3-phenylpropanoate (**21**)

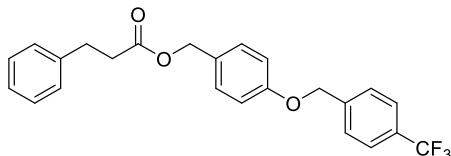

$^1\text{H NMR}$  (300 MHz,  $\text{CDCl}_3$ )  $\delta$  7.68 (dq,  $J = 8.0, 1.0$  Hz, 2H), 7.58 (ddt,  $J = 8.1, 1.5, 0.7$  Hz, 2H), 7.33–7.19 (m, 7H), 7.02–6.92 (m, 2H), 5.16 (d,  $J = 1.1$  Hz, 2H), 5.08 (s, 2H), 2.99 (t,  $J = 7.8$  Hz, 2H), 2.73–2.63 (m, 2H).

$^{13}\text{C NMR}$  (75 MHz,  $\text{CDCl}_3$ )  $\delta$  172.80, 158.40, 140.96, 140.44, 131.14, 130.41, 130.16, 129.98, 129.50, 128.80, 128.51, 128.32, 127.36, 126.27, 125.67, 125.62, 125.57, 125.52, 122.28, 114.84, 69.15, 65.99, 35.94, 30.96.

$^{19}\text{F NMR}$  (282 MHz,  $\text{CDCl}_3$ )  $\delta$  -62.56.

Cyclohexyl 3-phenylpropanoate (**22**)



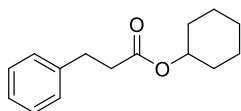

$^1\text{H}$  NMR (300 MHz,  $\text{CDCl}_3$ )  $\delta$  7.25-7.08 (m, 5H), 4.68 (dq,  $J = 9.0, 4.3$  Hz, 1H), 2.88 (t,  $J = 7.8$  Hz, 2H), 2.60-2.49 (m, 2H), 1.79-1.44 (m, 6H), 1.31-1.18 (m, 4H).

$^{13}\text{C}$  NMR (75 MHz,  $\text{CDCl}_3$ )  $\delta$  172.42, 140.65, 128.44, 128.33, 126.19, 72.69, 36.29, 31.62, 31.10, 25.39, 23.75.

1-Cyclohexylethyl 3-phenylpropanoate (**23**)

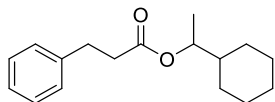

$^1\text{H}$  NMR (300 MHz,  $\text{CDCl}_3$ )  $\delta$  7.31-7.20 (m, 5H), 4.75 (p,  $J = 6.4$  Hz, 1H), 2.98 (t,  $J = 7.8$  Hz, 2H), 2.70-2.59 (m, 2H), 1.73-1.59 (m, 5H), 1.47-1.21 (m, 4H), 1.15 (d,  $J = 6.4$  Hz, 3H), 1.01-0.87 (m, 2H).

$^{13}\text{C}$  NMR (75 MHz,  $\text{CDCl}_3$ )  $\delta$  172.62, 140.61, 128.44, 128.32, 126.19, 74.71, 42.52, 36.22, 31.11, 28.48, 28.42, 26.38, 26.05, 26.00, 17.06.

Hex-5-en-1-yl 3-phenylpropanoate (**24**)

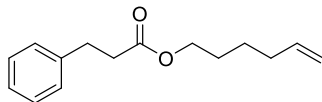

$^1\text{H}$  NMR (300 MHz,  $\text{CDCl}_3$ )  $\delta$  7.34-7.19 (m, 5H), 5.81 (ddt,  $J = 16.9, 10.2, 6.7$  Hz, 1H), 5.09-4.93 (m, 2H), 4.10 (t,  $J = 6.6$  Hz, 2H), 2.98 (t,  $J = 7.8$  Hz, 2H), 2.69-2.61 (m, 2H), 2.14-2.03 (m, 2H), 1.66-1.58 (m, 2H), 1.50-1.39 (m, 2H).

$^{13}\text{C}$  NMR (75 MHz,  $\text{CDCl}_3$ )  $\delta$  173.01, 140.56, 138.36, 128.49, 128.30, 126.25, 114.83, 64.42, 35.93, 33.28, 31.01, 28.05, 25.17.

(E)-Hex-3-en-1-yl 3-phenylpropanoate (**25**)

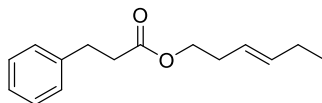

$^1\text{H}$  NMR (300 MHz,  $\text{CDCl}_3$ )  $\delta$  7.34-7.19 (m, 5H), 5.62-5.50 (m, 1H), 5.43-5.30 (m, 1H), 4.10 (t,  $J = 6.9$  Hz, 2H), 2.98 (dd,  $J = 8.5, 7.1$  Hz, 2H), 2.69-2.60 (m, 2H), 2.32 (dddd,  $J = 8.0, 6.8, 5.7, 1.2$  Hz, 2H), 2.03 (dddd,  $J = 8.6, 7.4, 6.2, 5.0$  Hz, 2H), 0.99 (t,  $J = 7.5$  Hz, 3H).

$^{13}\text{C}$  NMR (75 MHz,  $\text{CDCl}_3$ )  $\delta$  172.91, 140.59, 135.09, 128.49, 128.30, 126.25, 124.04, 64.16, 35.94, 31.94, 31.00, 25.63, 13.75.

Cyclohex-3-en-1-ylmethyl 3-phenylpropanoate (**26**)

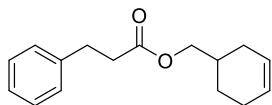

$^1\text{H}$  NMR (300 MHz,  $\text{CDCl}_3$ )  $\delta$  7.34-7.17 (m, 5H), 5.75-5.61 (m, 2H), 4.00 (d,  $J = 6.6$  Hz, 2H), 2.99 (t,  $J = 7.8$  Hz, 2H), 2.71-2.63 (m, 2H), 2.11-2.04 (m, 3H), 1.99-1.88 (m, 1H), 1.79-1.65 (m, 2H), 1.40-1.17 (m, 2H).

$^{13}\text{C}$  NMR (75 MHz,  $\text{CDCl}_3$ )  $\delta$  173.05, 140.53, 128.50, 128.29, 127.04, 126.26, 125.51, 68.78, 35.93, 33.01, 31.05, 28.13, 25.26, 24.41.

Cinnamyl 3-phenylpropanoate (**27**)

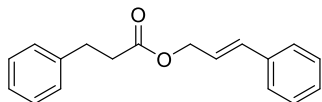

$^1\text{H}$  NMR (300 MHz,  $\text{CDCl}_3$ )  $\delta$  7.41-7.23 (m, 10H), 6.66 (d,  $J = 15.9$  Hz, 1H), 6.29 (dt,  $J = 15.9, 6.4$  Hz, 1H), 4.77 (dd,  $J = 6.4, 1.3$  Hz, 2H), 3.06-2.98 (m, 2H), 2.75-2.68 (m, 2H).

$^{13}\text{C}$  NMR (75 MHz,  $\text{CDCl}_3$ )  $\delta$  172.69, 140.48, 136.23, 134.23, 128.63, 128.54, 128.35, 128.10, 126.65, 126.31, 123.19, 65.09, 35.94, 31.00.

Butyl propionate (**28**)

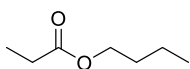

$^1\text{H NMR}$  (300 MHz,  $\text{CDCl}_3$ )  $\delta$  4.04 (t,  $J = 6.7$  Hz, 2H), 2.28 (q,  $J = 7.6$  Hz, 2H), 1.64–1.52 (m, 2H), 1.42–1.28 (m, 2H), 1.10 (t,  $J = 7.6$  Hz, 3H), 0.94–0.85 (m, 3H).

$^{13}\text{C NMR}$  (75 MHz,  $\text{CDCl}_3$ )  $\delta$  174.46, 64.07, 30.66, 27.52, 19.08, 13.60, 9.05.

Butyl butyrate (**29**)

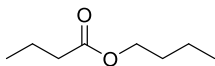

$^1\text{H NMR}$  (300 MHz,  $\text{CDCl}_3$ )  $\delta$  4.02 (t,  $J = 6.7$  Hz, 2H), 2.22 (dd,  $J = 7.7, 7.1$  Hz, 2H), 1.67–1.49 (m, 4H), 1.40–1.26 (m, 2H), 0.94–0.84 (m, 6H).

$^{13}\text{C NMR}$  (75 MHz,  $\text{CDCl}_3$ )  $\delta$  173.57, 63.91, 36.14, 30.65, 19.06, 18.39, 13.56, 13.52.

Butyl hexanoate (**30**)

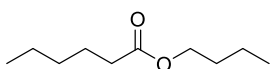

$^1\text{H NMR}$  (300 MHz,  $\text{CDCl}_3$ )  $\delta$  4.06–3.94 (m, 2H), 2.27–2.15 (m, 2H), 1.55 (dd,  $J = 7.1, 2.3$  Hz, 4H), 1.27–1.23 (m, 6H), 0.84 (dt,  $J = 7.0, 4.2$  Hz, 6H).

$^{13}\text{C NMR}$  (75 MHz,  $\text{CDCl}_3$ )  $\delta$  173.88, 64.01, 34.31, 31.30, 30.69, 24.67, 22.28, 19.11, 13.83, 13.63.

Butyl nonanoate (**31**)

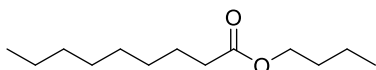

$^1\text{H NMR}$  (300 MHz,  $\text{CDCl}_3$ )  $\delta$  4.00 (t,  $J = 6.7$  Hz, 2H), 2.26–2.17 (m, 2H), 1.57–1.52 (m, 2H), 1.39–1.11 (m, 14H), 0.89–0.77 (m, 6H).

$^{13}\text{C NMR}$  (75 MHz,  $\text{CDCl}_3$ )  $\delta$  174.07, 64.12, 34.43, 31.82, 30.72, 29.24, 29.17, 29.14, 25.04, 22.65, 19.16, 14.10, 13.73.

Butyl tetradecanoate (**32**)

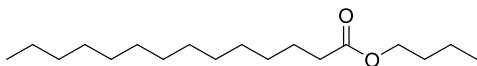

$^1\text{H NMR}$  (300 MHz,  $\text{CDCl}_3$ )  $\delta$  4.06 (t,  $J = 6.7$  Hz, 2H), 2.27 (t,  $J = 7.5$  Hz, 2H), 1.66–1.53 (m, 4H), 1.42–1.19 (m, 22H), 0.96–0.82 (m, 6H).

$^{13}\text{C NMR}$  (75 MHz,  $\text{CDCl}_3$ )  $\delta$  173.86, 64.00, 34.34, 31.91, 30.70, 29.66, 29.63, 29.58, 29.45, 29.34, 29.25, 29.14, 24.99, 22.66, 19.12, 14.04, 13.64.

Phenyl 3-phenylpropanoate (**33**)

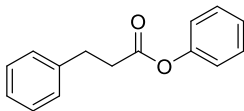

$^1\text{H NMR}$  (300 MHz,  $\text{CDCl}_3$ )  $\delta$  7.29–7.12 (m, 8H), 6.98–6.88 (m, 2H), 3.01 (dd,  $J = 8.2, 7.0$  Hz, 2H), 2.81 (ddd,  $J = 8.1, 7.2, 0.9$  Hz, 2H).

$^{13}\text{C NMR}$  (75 MHz,  $\text{CDCl}_3$ )  $\delta$  171.42, 150.68, 140.15, 129.42, 128.61, 128.43, 126.47, 125.82, 121.55, 36.02, 30.99.

Naphthalen-2-yl 3-phenylpropanoate (**34**)

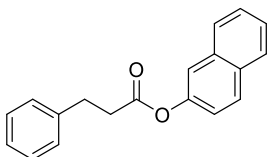

$^1\text{H NMR}$  (300 MHz,  $\text{CDCl}_3$ )  $\delta$  7.80–7.64 (m, 3H), 7.45–7.33 (m, 3H), 7.30–7.14 (m, 5H), 7.07 (dd,  $J = 8.9, 2.3$  Hz, 1H), 3.04 (dd,  $J = 8.0, 6.7$  Hz, 2H), 2.87 (ddd,  $J = 8.3, 7.2, 1.0$  Hz, 2H).

$^{13}\text{C NMR}$  (75 MHz,  $\text{CDCl}_3$ )  $\delta$  171.62, 148.31, 140.16, 133.76, 131.47, 129.41, 128.66, 128.48, 127.79, 127.66, 126.57, 126.52, 125.72, 121.12,

118.53, 36.10, 31.03.

Naphthalen-1-yl 3-phenylpropanoate (**35**)

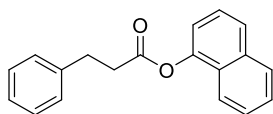

$^1\text{H NMR}$  (300 MHz,  $\text{CDCl}_3$ )  $\delta$  7.92–7.85 (m, 1H), 7.76 (dt,  $J = 8.3, 1.1$  Hz, 1H), 7.68–7.59 (m, 1H), 7.53–7.31 (m, 8H), 7.21 (dd,  $J = 7.5, 1.1$  Hz, 1H), 3.27–3.17 (m, 2H), 3.15–3.07 (m, 2H).

$^{13}\text{C NMR}$  (75 MHz,  $\text{CDCl}_3$ )  $\delta$  171.53, 146.58, 140.12, 134.65, 128.73, 128.56, 127.99, 126.75, 126.58, 126.45, 126.42, 126.05, 125.85, 125.39, 121.17, 118.04, 36.02, 31.12.

[1,1'-biphenyl]-4-yl 3-Phenylpropanoate (**36**)

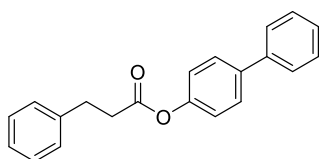

$^1\text{H NMR}$  (300 MHz,  $\text{CDCl}_3$ )  $\delta$  7.68–7.55 (m, 4H), 7.52–7.43 (m, 2H), 7.42–7.23 (m, 6H), 7.23–7.09 (m, 2H), 3.20–3.08 (m, 2H), 2.95 (ddd,  $J = 8.2, 7.2, 1.0$  Hz, 2H).

$^{13}\text{C NMR}$  (75 MHz,  $\text{CDCl}_3$ )  $\delta$  171.52, 150.08, 140.40, 140.14, 139.01, 128.82, 128.65, 128.47, 128.19, 127.37, 127.15, 126.51, 121.84, 36.06, 31.01.

[1,1'-Biphenyl]-2-yl 3-phenylpropanoate (**37**)

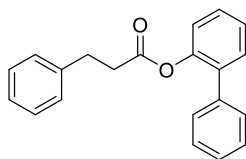

$^1\text{H NMR}$  (300 MHz,  $\text{CDCl}_3$ )  $\delta$  7.46–7.11 (m, 14H), 2.88 (d,  $J = 8.2$  Hz, 2H), 2.72 (ddd,  $J = 8.3, 7.2, 1.0$  Hz, 2H).

$^{13}\text{C NMR}$  (75 MHz,  $\text{CDCl}_3$ )  $\delta$  171.35, 147.79, 140.22, 137.59, 134.96, 130.91, 129.00, 128.57, 128.55, 128.32, 128.29, 127.52, 126.38, 122.85, 35.80, 30.67.

4-(2-Phenylpropan-2-yl)phenyl 3-phenylpropanoate (**38**)

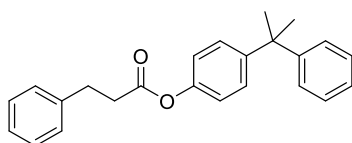

$^1\text{H NMR}$  (300 MHz,  $\text{CDCl}_3$ )  $\delta$  7.38–7.21 (m, 12H), 7.00–6.92 (m, 2H), 3.12 (t,  $J = 7.6$  Hz, 2H), 2.92 (ddd,  $J = 8.2, 7.3, 0.9$  Hz, 2H), 1.72 (d,  $J = 0.7$  Hz, 6H).

$^{13}\text{C NMR}$  (75 MHz,  $\text{CDCl}_3$ )  $\delta$  171.57, 150.37, 148.49, 148.24, 140.19, 128.63, 128.46, 128.09, 127.86, 126.82, 126.48, 125.77, 120.87, 42.75, 36.05, 31.02, 30.96, 30.87.

9H-Carbazol-2-yl 3-phenylpropanoate (**39**)

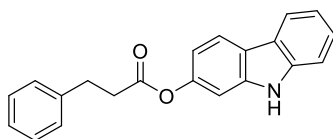

$^1\text{H NMR}$  (300 MHz,  $\text{CDCl}_3$ )  $\delta$  8.09 (s, 1H), 8.01 (ddt,  $J = 8.4, 7.6, 0.7$  Hz, 2H), 7.42–7.25 (m, 8H), 7.09 (dd,  $J = 2.0, 0.5$  Hz, 1H), 6.89 (dd,  $J = 8.4, 2.0$  Hz, 1H), 3.16 (dd,  $J = 8.0, 6.8$  Hz, 2H), 2.98 (ddd,  $J = 8.2, 7.2, 1.0$  Hz, 2H).

$^{13}\text{C NMR}$  (75 MHz,  $\text{CDCl}_3$ )  $\delta$  171.94, 140.21, 128.65, 128.48, 126.49, 125.70, 122.91, 121.31, 120.78, 120.15, 119.73, 113.28, 110.63, 103.79, 36.13, 31.06.

4-Fluorophenyl 3-phenylpropanoate (**40**)

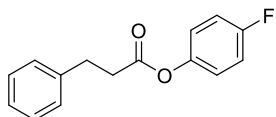

$^1\text{H NMR}$  (300 MHz,  $\text{CDCl}_3$ )  $\delta$  7.28–7.10 (m, 5H), 7.00–6.83 (m, 4H), 2.98 (t,  $J = 7.8$  Hz, 2H), 2.79 (ddd,  $J = 8.2, 7.2, 1.0$  Hz, 2H).

$^{13}\text{C NMR}$  (75 MHz,  $\text{CDCl}_3$ )  $\delta$  171.46, 161.85, 158.61, 146.49, 146.45, 140.03, 128.64, 128.42, 126.53, 123.00, 122.88, 116.22, 115.91, 35.91, 30.95.

$^{19}\text{F NMR}$  (282 MHz,  $\text{CDCl}_3$ )  $\delta$  -117.04.

2-Fluorophenyl 3-phenylpropanoate (**41**)

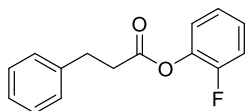

$^1\text{H NMR}$  (300 MHz,  $\text{CDCl}_3$ )  $\delta$  7.36–6.83 (m, 9H), 3.02 (ddd,  $J = 8.3, 7.3, 1.1$  Hz, 2H), 2.85 (ddd,  $J = 8.3, 7.1, 1.1$  Hz, 2H).

$^{13}\text{C NMR}$  (75 MHz,  $\text{CDCl}_3$ )  $\delta$  170.39, 155.76, 152.46, 140.01, 138.19, 138.02, 128.61, 128.38, 127.13, 127.03, 126.48, 124.47, 124.42, 123.74, 116.82, 116.58, 35.53, 30.90.

$^{19}\text{F NMR}$  (282 MHz,  $\text{CDCl}_3$ )  $\delta$  -128.42-128.50 (m).

3-Fluorophenyl 3-phenylpropanoate (**42**)

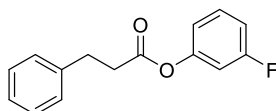

$^1\text{H NMR}$  (300 MHz,  $\text{CDCl}_3$ )  $\delta$  7.33–7.12 (m, 6H), 6.92–6.80 (m, 1H), 6.79–6.64 (m, 2H), 3.07–2.93 (m, 2H), 2.81 (ddd,  $J = 8.2, 7.2, 1.0$  Hz, 2H).

$^{13}\text{C NMR}$  (75 MHz,  $\text{CDCl}_3$ )  $\delta$  170.98, 164.49, 161.21, 151.53, 151.38, 139.94, 130.21, 130.08, 128.64, 128.40, 126.54, 117.38, 117.34, 113.00, 112.73, 109.86, 109.53, 35.94, 30.90.

$^{19}\text{F NMR}$  (282 MHz,  $\text{CDCl}_3$ )  $\delta$  -111.08-111.14 (m).

3-Acetylphenyl 3-phenylpropanoate (**43**)

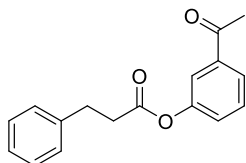

$^1\text{H NMR}$  (300 MHz,  $\text{CDCl}_3$ )  $\delta$  7.84 (ddd,  $J = 7.8, 1.6, 1.0$  Hz, 1H), 7.61–7.45 (m, 3H), 7.39–7.28 (m, 5H), 3.13 (d,  $J = 7.5$  Hz, 2H), 2.99–2.89 (m, 2H), 2.61 (s, 3H).

$^{13}\text{C NMR}$  (75 MHz,  $\text{CDCl}_3$ )  $\delta$  196.97, 171.24, 150.85, 139.93, 138.51, 129.64, 128.65, 128.42, 126.55, 126.42, 125.75, 121.44, 35.93, 30.93, 26.70.

4-Acetylphenyl 3-phenylpropanoate (**44**)

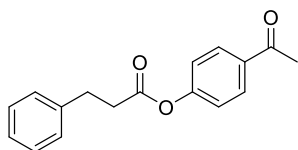

$^1\text{H NMR}$  (300 MHz,  $\text{CDCl}_3$ )  $\delta$  8.02 (s, 1H), 7.94 (s, 2H), 7.38–7.29 (m, 3H), 7.12 (d,  $J = 0.4$  Hz, 1H), 6.94 (s, 2H), 3.18–3.05 (m, 2H), 3.00–2.90 (m, 2H), 2.59 (s, 3H).

$^{13}\text{C NMR}$  (75 MHz,  $\text{CDCl}_3$ )  $\delta$  197.39, 170.96, 154.42, 139.85, 134.67, 131.03, 130.01, 128.67, 128.40, 126.59, 121.79, 115.38, 36.01, 30.87, 26.35.

*o*-Tolyl 3-phenylpropanoate (**45**)

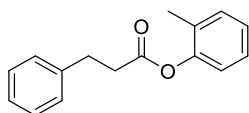

$^1\text{H NMR}$  (300 MHz,  $\text{CDCl}_3$ )  $\delta$  7.45–7.11 (m, 9H), 7.03–6.92 (m, 1H), 3.15 (dd,  $J = 8.0, 6.8$  Hz, 2H), 3.02–2.92 (m, 2H), 2.13 (s, 3H).

$^{13}\text{C NMR}$  (75 MHz,  $\text{CDCl}_3$ )  $\delta$  171.16, 149.34, 140.18, 131.15, 130.12, 128.63, 128.46, 126.93, 126.50, 126.05, 121.87, 35.80, 31.04, 16.11.

*m*-Tolyl 3-phenylpropanoate (**46**)

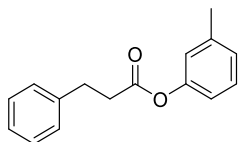

$^1\text{H NMR}$  (300 MHz,  $\text{CDCl}_3$ )  $\delta$  7.28–7.09 (m, 6H), 6.99–6.88 (m, 1H), 6.78–6.66 (m, 2H), 2.99 (t,  $J = 7.8$  Hz, 2H), 2.78 (ddd,  $J = 8.1, 7.2, 0.9$  Hz, 2H), 2.25 (t,  $J = 0.7$  Hz, 3H).

$^{13}\text{C NMR}$  (75 MHz,  $\text{CDCl}_3$ )  $\delta$  171.55, 150.63, 140.21, 139.62, 129.15, 128.62, 128.46, 126.65, 126.47, 122.17, 118.50, 36.05, 31.02, 21.33.

*p*-Tolyl 3-phenylpropanoate (**47**)

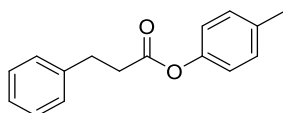

$^1\text{H NMR}$  (300 MHz,  $\text{CDCl}_3$ )  $\delta$  7.38–7.24 (m, 5H), 7.22–7.15 (m, 2H), 6.96–6.88 (m, 2H), 3.11 (t,  $J = 7.7$  Hz, 2H), 2.95–2.86 (m, 2H), 2.36 (s, 3H).

$^{13}\text{C NMR}$  (75 MHz,  $\text{CDCl}_3$ )  $\delta$  171.64, 148.43, 140.21, 135.45, 129.93, 128.60, 128.44, 126.44, 121.21, 36.03, 31.02, 20.88.

2,6-Dimethylphenyl 3-phenylpropanoate (**48**)

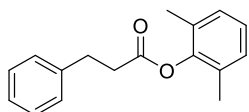

$^1\text{H NMR}$  (300 MHz,  $\text{CDCl}_3$ )  $\delta$  7.45–7.22 (m, 5H), 7.14–7.02 (m, 3H), 3.22–3.11 (m, 2H), 3.05–2.93 (m, 2H), 2.10 (t,  $J = 0.8$  Hz, 6H).

$^{13}\text{C NMR}$  (75 MHz,  $\text{CDCl}_3$ )  $\delta$  170.67, 148.20, 140.21, 130.12, 128.62, 128.59, 128.46, 126.49, 125.86, 35.51, 31.02, 16.26.

2,4-Dimethylphenyl 3-phenylpropanoate (**49**)

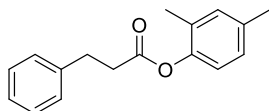

$^1\text{H NMR}$  (300 MHz,  $\text{CDCl}_3$ )  $\delta$  7.41–7.20 (m, 5H), 7.08–6.97 (m, 2H), 6.85 (d,  $J = 8.0$  Hz, 1H), 3.18–3.06 (m, 2H), 2.95 (ddd,  $J = 8.2, 7.2, 1.0$  Hz, 2H), 2.34 (s, 3H), 2.08 (s, 3H).

$^{13}\text{C NMR}$  (75 MHz,  $\text{CDCl}_3$ )  $\delta$  171.37, 147.08, 140.23, 135.60, 131.77, 129.65, 128.61, 128.45, 127.46, 126.46, 121.50, 35.81, 31.07, 20.84, 16.03.

2-*tert*-Butylphenyl 3-phenylpropanoate (**50**)

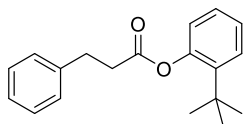

$^1\text{H NMR}$  (300 MHz,  $\text{CDCl}_3$ )  $\delta$  7.45–7.17 (m, 8H), 6.96 (ddd,  $J = 7.6, 1.7, 0.7$  Hz, 1H), 3.20–3.12 (m, 2H), 3.02–2.94 (m, 2H), 1.37 (d,  $J = 0.7$  Hz, 9H).

$^{13}\text{C NMR}$  (75 MHz,  $\text{CDCl}_3$ )  $\delta$  171.49, 149.22, 140.99, 140.20, 128.65, 128.54, 128.50, 127.24, 126.91, 126.51, 125.76, 123.99, 36.63, 34.48, 30.81, 30.23.

4-*tert*-Butylphenyl 3-phenylpropanoate (**51**)

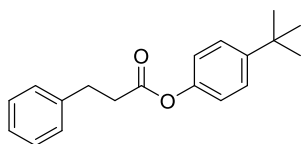

$^1\text{H NMR}$  (300 MHz,  $\text{CDCl}_3$ )  $\delta$  7.33–7.11 (m, 7H), 6.88–6.81 (m, 2H), 3.00 (dd,  $J = 8.4, 7.2$  Hz, 2H), 2.80 (ddd,  $J = 8.1, 7.2, 0.9$  Hz, 2H), 1.23 (s, 9H).

$^{13}\text{C NMR}$  (75 MHz,  $\text{CDCl}_3$ )  $\delta$  171.63, 148.62, 148.30, 140.21, 128.60, 128.45, 126.44, 126.32, 120.83, 36.04, 34.48, 31.42, 31.02.

2,4-di-*tert*-Butylphenyl 3-phenylpropanoate (**52**)

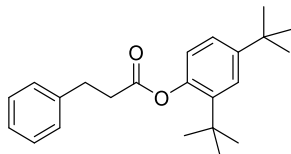

$^1\text{H NMR}$  (300 MHz,  $\text{CDCl}_3$ )  $\delta$  7.46–7.21 (m, 7H), 6.87 (dd,  $J = 8.5, 1.0$  Hz, 1H), 3.15 (t,  $J = 7.7$  Hz, 2H), 3.01–2.92 (m, 2H), 1.40–1.29 (m, 18H).

$^{13}\text{C NMR}$  (75 MHz,  $\text{CDCl}_3$ )  $\delta$  171.62, 148.09, 146.79, 140.25, 139.89, 128.61, 128.49, 126.46, 124.13, 123.78, 123.16, 36.64, 34.69, 34.64, 31.52, 30.83, 30.28.

4-Methoxyphenyl 3-phenylpropanoate (**53**)

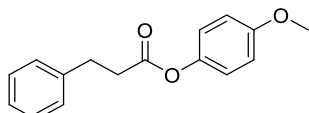

$^1\text{H NMR}$  (300 MHz,  $\text{CDCl}_3$ )  $\delta$  7.40–7.24 (m, 5H), 6.97–6.88 (m, 3H), 6.84–6.75 (m, 1H), 3.82 (s, 3H), 3.10 (t,  $J = 7.8$  Hz, 2H), 2.90 (ddd,  $J = 8.1, 7.3, 0.9$  Hz, 2H).

$^{13}\text{C NMR}$  (75 MHz,  $\text{CDCl}_3$ )  $\delta$  171.85, 157.24, 144.15, 140.19, 128.60, 128.43, 126.45, 122.29, 114.45, 55.60, 35.97, 31.01.

Phenyl propionate (**54**)

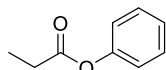

$^1\text{H NMR}$  (300 MHz,  $\text{CDCl}_3$ )  $\delta$  7.47–7.37 (m, 2H), 7.33–7.23 (m, 1H), 7.21–7.10 (m, 2H), 2.63 (q,  $J = 7.6$  Hz, 2H), 1.32 (t,  $J = 7.6$  Hz, 3H).

$^{13}\text{C NMR}$  (75 MHz,  $\text{CDCl}_3$ )  $\delta$  172.92, 150.89, 129.43, 125.73, 121.62, 27.76, 9.10.

Phenyl hexanoate (**55**)

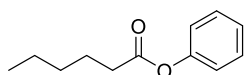

$^1\text{H NMR}$  (300 MHz,  $\text{CDCl}_3$ )  $\delta$  7.46–7.35 (m, 2H), 7.31–7.20 (m, 1H), 7.17–7.04 (m, 2H), 2.58 (t,  $J = 7.5$  Hz, 2H), 1.86–1.72 (m, 2H), 1.50–1.35 (m, 4H), 1.00–0.92 (m, 3H).

$^{13}\text{C NMR}$  (75 MHz,  $\text{CDCl}_3$ )  $\delta$  172.36, 150.79, 129.40, 125.71, 121.60, 77.24, 34.40, 31.29, 24.66, 22.35, 13.94.

Phenyl nonanoate (**56**)

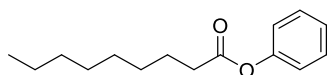

$^1\text{H NMR}$  (300 MHz,  $\text{CDCl}_3$ )  $\delta$  7.34–7.24 (m, 2H), 7.19–7.09 (m, 1H), 7.04–6.84 (m, 2H), 2.52–2.43 (m, 2H), 1.76–1.60 (m, 2H), 1.36–1.18 (m, 10H), 0.85–0.78 (m, 3H).

$^{13}\text{C NMR}$  (75 MHz,  $\text{CDCl}_3$ )  $\delta$  172.37, 150.79, 129.40, 125.71, 121.61, 34.44, 31.83, 29.25, 29.15, 29.14, 24.98, 22.67, 14.12.

Phenyl tetradecanoate (**57**)

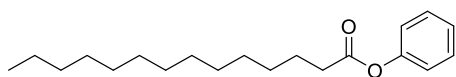

$^1\text{H}$  NMR (300 MHz,  $\text{CDCl}_3$ )  $\delta$  7.45–7.36 (m, 2H), 7.31–7.21 (m, 1H), 7.15–7.06 (m, 2H), 2.62–2.53 (m, 2H), 1.84–1.71 (m, 2H), 1.29 (s, 20H), 0.95–0.89 (m, 3H).

$^{13}\text{C}$  NMR (75 MHz,  $\text{CDCl}_3$ )  $\delta$  172.35, 150.79, 129.40, 125.71, 121.60, 34.44, 31.95, 29.72, 29.70, 29.68, 29.62, 29.49, 29.39, 29.29, 29.14, 24.99, 22.72, 14.14.

#### Methyl acetate (58)

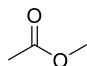

$^1\text{H}$  NMR (300 MHz,  $\text{CDCl}_3$ )  $\delta$  3.54 (d,  $J = 1.2$  Hz, 3H), 1.93 (d,  $J = 1.2$  Hz, 3H).

$^{13}\text{C}$  NMR (75 MHz,  $\text{CDCl}_3$ )  $\delta$  171.19, 51.28, 20.34.

#### Ethyl acetate (59)

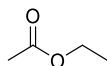

$^1\text{H}$  NMR (300 MHz,  $\text{CDCl}_3$ )  $\delta$  4.11 (q,  $J = 7.1$  Hz, 2H), 2.03 (s, 3H), 1.24 (t,  $J = 7.1$  Hz, 3H).

$^{13}\text{C}$  NMR (75 MHz,  $\text{CDCl}_3$ )  $\delta$  171.05, 60.33, 20.97, 14.14.

#### Butyl acetate (60)

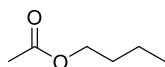

$^1\text{H}$  NMR (300 MHz,  $\text{CDCl}_3$ )  $\delta$  4.05 – 3.95 (m, 2H), 2.05 – 1.89 (m, 3H), 1.61 – 1.48 (m, 2H), 1.40 – 1.24 (m, 2H), 0.94 – 0.81 (m, 3H).

$^{13}\text{C}$  NMR (75 MHz,  $\text{CDCl}_3$ )  $\delta$  171.01, 170.99, 64.19, 30.58, 20.80, 19.03, 13.56.

#### Decyl acetate (61)

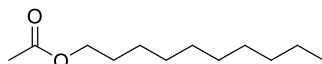

$^1\text{H}$  NMR (300 MHz,  $\text{CDCl}_3$ )  $\delta$  3.98 (t,  $J = 6.7$  Hz, 2H), 1.98 (s, 3H), 1.55 (t,  $J = 7.2$  Hz, 2H), 1.22 (d,  $J = 11.4$  Hz, 14H), 0.83 – 0.78 (m, 3H).

$^{13}\text{C}$  NMR (75 MHz,  $\text{CDCl}_3$ )  $\delta$  171.26, 64.68, 31.89, 29.53, 29.31, 29.26, 28.61, 25.92, 22.68, 21.03, 14.11.

#### Phenyl acetate (62)

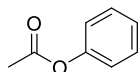

$^1\text{H}$  NMR (300 MHz,  $\text{CDCl}_3$ )  $\delta$  7.47 – 7.38 (m, 2H), 7.32 – 7.23 (m, 1H), 7.19 – 7.10 (m, 2H), 2.33 (s, 3H).

$^{13}\text{C}$  NMR (75 MHz,  $\text{CDCl}_3$ )  $\delta$  169.49, 150.77, 129.47, 125.86, 121.63, 21.13.

#### Octyl acetate (63)

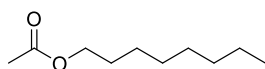

$^1\text{H}$  NMR (300 MHz,  $\text{CDCl}_3$ )  $\delta$  4.04 (t,  $J = 6.8$  Hz, 2H), 2.03 (s, 3H), 1.59 (dt,  $J = 8.0, 6.3$  Hz, 2H), 1.37 – 1.19 (m, 10H), 0.96 – 0.79 (m, 3H).

$^{13}\text{C}$  NMR (75 MHz,  $\text{CDCl}_3$ )  $\delta$  171.12, 64.59, 31.75, 29.19, 29.15, 28.58, 25.89, 22.60, 20.92, 14.02.

#### Isopropyl acetate (64)

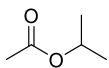

$^1\text{H NMR}$  (300 MHz,  $\text{CDCl}_3$ )  $\delta$  5.06 – 4.86 (m, 1H), 1.99 (dd,  $J = 1.6, 0.8$  Hz, 3H), 1.22 – 1.16 (m, 6H).

$^{13}\text{C NMR}$  (75 MHz,  $\text{CDCl}_3$ )  $\delta$  170.55, 67.54, 21.75, 21.34.

Allyl acetate (**65**)

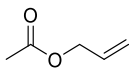

$^1\text{H NMR}$  (300 MHz,  $\text{CDCl}_3$ )  $\delta$  5.95 – 5.77 (m, 1H), 5.33 – 5.14 (m, 2H), 4.52 (dt,  $J = 5.8, 1.5$  Hz, 2H), 2.05 – 1.99 (m, 3H).

$^{13}\text{C NMR}$  (75 MHz,  $\text{CDCl}_3$ )  $\delta$  170.51, 132.18, 118.03, 65.02, 20.75.

Hex-5-en-1-yl acetate (**66**)

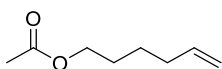

$^1\text{H NMR}$  (300 MHz,  $\text{CDCl}_3$ )  $\delta$  5.77 (ddt,  $J = 16.9, 10.2, 6.6$  Hz, 1H), 5.04 – 4.91 (m, 2H), 4.04 (t,  $J = 6.6$  Hz, 2H), 2.11 – 2.00 (m, 5H), 1.69 – 1.56 (m, 2H), 1.50 – 1.38 (m, 2H).

$^{13}\text{C NMR}$  (75 MHz,  $\text{CDCl}_3$ )  $\delta$  171.09, 138.27, 114.77, 64.33, 33.25, 28.00, 25.14, 20.91.

(E)-1,3-Diphenylallyl acetate (**67**)

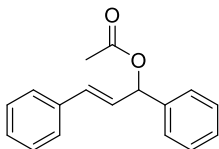

$^1\text{H NMR}$  (300 MHz,  $\text{CDCl}_3$ )  $\delta$  7.55 – 7.37 (m, 10H), 6.74 (dd,  $J = 15.8, 3.5$  Hz, 1H), 6.61 – 6.39 (m, 2H), 2.21 (dd,  $J = 1.9, 0.8$  Hz, 3H).

$^{13}\text{C NMR}$  (75 MHz,  $\text{CDCl}_3$ )  $\delta$  170.13, 139.36, 136.27, 132.70, 128.74, 128.69, 128.28, 128.18, 127.61, 127.16, 126.81, 76.27, 21.41.

4-Methoxybenzyl acetate (**68**)

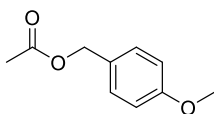

$^1\text{H NMR}$  (300 MHz,  $\text{CDCl}_3$ )  $\delta$  7.36 – 7.28 (m, 2H), 6.95 – 6.86 (m, 2H), 5.06 (s, 2H), 3.81 (d,  $J = 0.7$  Hz, 3H), 2.09 (s, 3H).

$^{13}\text{C NMR}$  (75 MHz,  $\text{CDCl}_3$ )  $\delta$  170.92, 159.68, 130.14, 128.11, 113.96, 66.10, 55.24, 21.04.

4-Formyl-2-methoxyphenyl acetate (**69**)

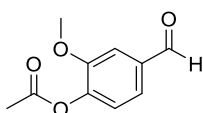

$^1\text{H NMR}$  (300 MHz,  $\text{CDCl}_3$ )  $\delta$  9.90 – 9.81 (m, 1H), 7.39 (dt,  $J = 9.6, 1.6$  Hz, 2H), 7.13 (dd,  $J = 7.9, 1.4$  Hz, 1H), 3.85 – 3.78 (m, 3H), 2.30 – 2.23 (m, 3H).

$^{13}\text{C NMR}$  (75 MHz,  $\text{CDCl}_3$ )  $\delta$  191.04, 168.33, 151.97, 144.93, 135.23, 124.69, 123.42, 110.85, 56.08, 20.62.

Dimethyl adipate (**70**)



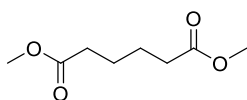

$^1\text{H NMR}$  (300 MHz,  $\text{CDCl}_3$ )  $\delta$  3.63–3.56 (m, 6H), 2.28 (tq,  $J = 4.5, 2.0$  Hz, 4H), 1.65–1.53 (m, 4H).

$^{13}\text{C NMR}$  (75 MHz,  $\text{CDCl}_3$ )  $\delta$  173.62, 51.41, 33.56, 24.29.

Dibutyl adipate (**71**)

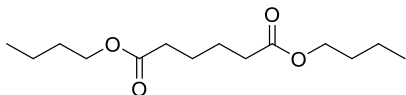

$^1\text{H NMR}$  (300 MHz,  $\text{CDCl}_3$ )  $\delta$  4.03 (t,  $J = 6.7$  Hz, 4H), 2.33 – 2.20 (m, 4H), 1.68 – 1.50 (m, 8H), 1.40 – 1.26 (m, 4H), 0.89 (t,  $J = 7.4$  Hz, 6H).

$^{13}\text{C NMR}$  (75 MHz,  $\text{CDCl}_3$ )  $\delta$  173.31, 64.13, 33.88, 30.63, 24.39, 19.08, 13.62.

Benzo[d][1,3]dioxol-5-yl 3-phenylpropanoate (**72**)

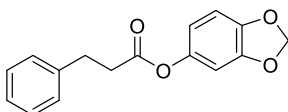

$^1\text{H NMR}$  (300 MHz,  $\text{CDCl}_3$ )  $\delta$  7.38–7.25 (m, 5H), 6.78 (dd,  $J = 8.3, 0.3$  Hz, 1H), 6.56–6.53 (m, 1H), 6.47 (ddd,  $J = 8.3, 2.4, 0.3$  Hz, 1H), 5.99 (s, 2H), 3.09 (t,  $J = 7.6$  Hz, 2H), 2.88 (ddd,  $J = 8.1, 7.3, 0.9$  Hz, 2H).

$^{13}\text{C NMR}$  (75 MHz,  $\text{CDCl}_3$ )  $\delta$  171.77, 147.98, 145.36, 144.95, 140.09, 128.62, 128.43, 126.50, 113.90, 107.97, 103.72, 101.70, 35.92, 30.98.

2,5,7,8-Tetramethyl-2-(4,8,12-trimethyltridecyl)chroman-6-yl 3-phenylpropanoate (**73**)

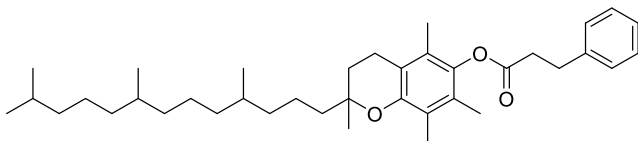

$^1\text{H NMR}$  (300 MHz,  $\text{CDCl}_3$ )  $\delta$  7.40 – 7.22 (m, 5H), 3.15 (dd,  $J = 8.1, 6.8$  Hz, 2H), 2.98 (ddd,  $J = 8.3, 7.2, 1.1$  Hz, 2H), 2.61 (t,  $J = 6.8$  Hz, 2H), 2.12 (s, 3H), 2.00 – 1.94 (m, 3H), 1.91 (s, 3H), 1.81 (dt,  $J = 9.4, 6.8$  Hz, 2H), 1.65 – 1.24 (m, 19H), 1.22 – 1.09 (m, 6H), 0.93 – 0.87 (m, 12H).

$^{13}\text{C NMR}$  (75 MHz,  $\text{CDCl}_3$ )  $\delta$  171.53, 149.42, 140.48, 140.38, 128.57, 128.49, 126.67, 126.40, 124.90, 123.03, 117.36, 75.06, 39.42, 37.58, 37.50, 37.43, 37.33, 35.63, 32.82, 32.73, 31.07, 28.02, 24.86, 24.49, 22.77, 22.68, 21.07, 20.63, 19.80, 19.73, 19.70, 19.67, 19.64, 12.89, 12.04, 11.86.

HRMS (ESI-TOF): calcd. for  $[\text{C}_{38}\text{H}_{58}\text{O}_3+\text{Na}]^+$  585.4278, found 585.4294.

(S)-1-(4-Fluorophenyl)-3-((2S,3R)-1-(4-fluorophenyl)-2-(4-hydroxyphenyl)-4-oxoazetidin-3-yl)propyl 3-phenylpropanoate (**74**)

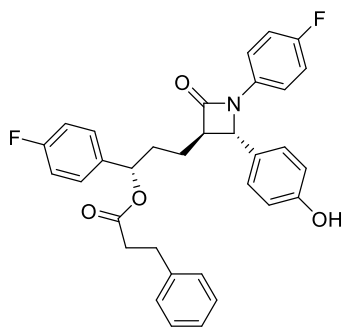

$^1\text{H NMR}$  (300 MHz,  $\text{CD}_3\text{OH}$ )  $\delta$  7.49 – 7.42 (m, 4H), 7.30 – 7.27 (m, 4H), 7.21 (d,  $J = 3.3$  Hz, 2H), 7.07 (td,  $J = 8.9, 2.6$  Hz, 3H), 7.00 – 6.94 (m, 4H), 6.75 (d,  $J = 8.6$  Hz, 1H), 4.77 (d,  $J = 9.8$  Hz, 1H), 4.66 (s, 1H), 3.05 – 3.00 (m, 1H), 2.93 – 2.85 (m, 2H), 2.73 – 2.61 (m, 2H), 2.30 – 2.16 (m, 2H), 2.09 – 2.00 (m, 1H), 1.78 – 1.64 (m, 1H).

$^{13}\text{C NMR}$  (75 MHz,  $\text{CD}_3\text{OH}$ )  $\delta$  172.54, 171.72, 150.41, 140.25, 138.35, 133.81, 131.58, 128.16, 128.08, 128.00, 127.90, 127.64, 127.39, 127.28, 126.02, 122.63, 122.52, 122.27, 122.16, 121.11, 114.88, 114.58, 114.33, 81.34, 79.12, 51.59, 35.39, 32.52, 30.52, 27.74.

$^{19}\text{F NMR}$  (282 MHz,  $\text{CD}_3\text{OH}$ )  $\delta$  -117.46 – -117.65 (m), -120.07 (tt,  $J = 9.1, 4.9$  Hz).

HRMS (ESI-TOF): calcd. for  $[\text{C}_{38}\text{H}_{29}\text{F}_2\text{NO}_4 + \text{Na}]^+$  564.1957, found 564.1965.

4-((2S,3R)-1-(4-Fluorophenyl)-3-((S)-3-(4-fluorophenyl)-3-hydroxypropyl)-4-oxoazetidin-2-yl)phenyl 3-phenylpropanoate (**75**)

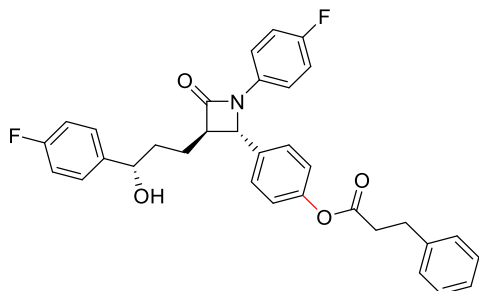

$^1\text{H NMR}$  (300 MHz,  $\text{CD}_3\text{OH}$ )  $\delta$  7.47 – 7.44 (m, 2H), 7.32 – 7.27 (m, 7H), 7.08 – 6.97 (m, 6H), 6.73 (s, 2H), 4.67 (d,  $J = 3.9$  Hz, 2H), 2.75 – 2.65 (m, 2H), 2.32 – 2.16 (m, 4H), 2.09 – 1.97 (m, 2H), 1.81 – 1.61 (m, 2H).

$^{13}\text{C NMR}$  (75 MHz,  $\text{CD}_3\text{OH}$ )  $\delta$  172.89, 163.72, 160.99, 160.49, 157.79, 156.87, 138.88, 138.84, 134.07, 131.57, 127.99, 127.44, 127.33, 122.28, 122.17, 114.86, 114.57, 114.30, 81.78, 79.23, 51.42, 47.06, 46.77, 32.63, 27.85.

$^{19}\text{F NMR}$  (282 MHz,  $\text{CD}_3\text{OH}$ )  $\delta$  -117.59 (ddd,  $J = 14.0, 9.0, 5.3$  Hz), -120.23 (tt,  $J = 8.5, 4.7$  Hz).

HRMS (ESI-TOF): calcd. for  $[\text{C}_{38}\text{H}_{29}\text{F}_2\text{NO}_4 + \text{Na}]^+$  564.1957, found 564.1970.

(8R,9S,13S,14S)-13-Methyl-17-oxo-7,8,9,11,12,13,14,15,16,17-decahydro-6H-cyclopenta[a]phenanthren-3-yl 3-phenylpropanoate (**76**)

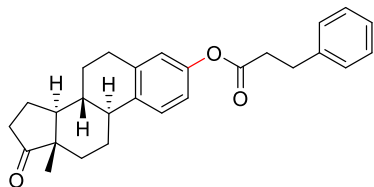

$^1\text{H NMR}$  (300 MHz,  $\text{CDCl}_3$ )  $\delta$  7.37 – 7.28 (m, 5H), 6.84 – 6.75 (m, 2H), 6.68 – 6.60 (m, 1H), 3.10 (dd,  $J = 8.3, 7.0$  Hz, 2H), 2.92 – 2.86 (m, 3H), 2.59 – 2.40 (m, 2H), 2.21 – 1.97 (m, 4H), 1.72 – 1.40 (m, 8H), 0.93 (s, 3H).

$^{13}\text{C NMR}$  (75 MHz,  $\text{CDCl}_3$ )  $\delta$  220.90, 171.74, 148.54, 140.19, 138.00, 137.38, 128.60, 128.45, 126.45, 126.40, 121.56, 118.73, 50.44, 47.98, 44.16, 38.01, 36.03, 35.88, 31.56, 31.02, 29.40, 26.35, 25.76, 21.61, 13.85.

HRMS (ESI-TOF): calcd. for  $[\text{C}_{27}\text{H}_{30}\text{O}_3 + \text{Na}]^+$  425.2087, found 425.2099.

Citronellyl acetate (**77**)

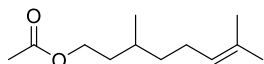

$^1\text{H NMR}$  (300 MHz,  $\text{CDCl}_3$ )  $\delta$  5.07 (ddt,  $J = 7.1, 5.7, 1.5$  Hz, 1H), 4.15 – 4.02 (m, 2H), 2.07 – 1.88 (m, 5H), 1.71 – 1.27 (m, 10H), 1.24 – 1.10 (m, 1H), 0.90 (d,  $J = 6.5$  Hz, 3H).

$^{13}\text{C NMR}$  (75 MHz,  $\text{CDCl}_3$ )  $\delta$  171.09, 131.23, 124.54, 62.95, 36.94, 35.39, 29.43, 25.65, 25.34, 20.94, 19.36, 17.58.

(3S,8S,9S,10R,13R,14S,17R)-10,13-Dimethyl-17-((R)-6-methylheptan-2-yl)-2,3,4,7,8,9,10,11,12,13,14,15,16,17-tetradecahydro-1H-cyclopenta[a]phenanthren-3-yl 3-phenylpropanoate (**78**)

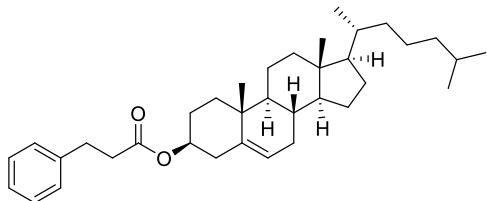

$^1\text{H NMR}$  (300 MHz,  $\text{CDCl}_3$ )  $\delta$  7.36 – 7.17 (m, 5H), 5.43 – 5.35 (m, 1H), 4.69 – 4.57 (m, 1H), 2.97 (t,  $J = 7.8$  Hz, 2H), 2.63 (dd,  $J = 8.5, 7.1$  Hz, 2H), 2.30 (d,  $J = 8.2$  Hz, 2H), 2.04 – 1.81 (m, 5H), 1.64 – 1.10 (m, 21H), 1.05 – 1.02 (m, 3H), 0.94 (d,  $J = 6.5$  Hz, 3H), 0.89 (dd,  $J = 6.6, 1.4$  Hz, 6H), 0.70 (s, 3H).

$^{13}\text{C NMR}$  (75 MHz,  $\text{CDCl}_3$ )  $\delta$  172.35, 140.62, 139.67, 128.46, 128.34, 126.21, 122.66, 74.03, 56.70, 56.15, 50.03, 42.33, 39.74, 39.53, 38.10, 37.00, 36.60, 36.26, 36.20, 35.81, 31.91, 31.87, 31.07, 28.25, 28.03, 27.76, 24.30, 23.84, 22.84, 22.58, 21.04, 19.33, 18.73, 11.87.

HRMS (ESI-TOF): calcd. for  $[\text{C}_{36}\text{H}_{54}\text{O}_2 + \text{Na}]^+$  541.4020, found 541.4033.

(3S,5S,8R,9S,10S,13R,14S,17R)-10,13-Dimethyl-17-((R)-6-methylheptan-2-yl)hexadecahydro-1H-cyclopenta[a]phenanthren-3-yl 3-phenylpropanoate (**79**)

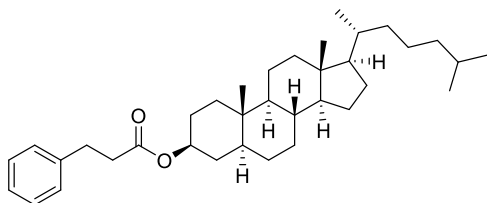

$^1\text{H NMR}$  (300 MHz,  $\text{CDCl}_3$ )  $\delta$  7.25 – 7.08 (m, 5H), 4.62 (ddd,  $J = 11.2, 6.4, 4.8$  Hz, 1H), 2.86 (t,  $J = 7.8$  Hz, 2H), 2.52 (dd,  $J = 8.5, 7.1$  Hz, 2H), 1.89 (d,  $J = 12.3$  Hz, 1H), 1.75 – 1.34 (m, 10H), 1.28 – 0.91 (m, 20H), 0.83 (d,  $J = 6.5$  Hz, 3H), 0.81 – 0.79 (m, 3H), 0.79 – 0.77 (m, 3H), 0.74 (d,  $J = 2.6$  Hz, 3H), 0.57 (s, 3H).

$^{13}\text{C NMR}$  (75 MHz,  $\text{CDCl}_3$ )  $\delta$  172.53, 140.66, 128.44, 128.34, 126.19, 73.84, 56.43, 56.28, 54.22, 44.66, 42.60, 39.99, 39.53, 36.76, 36.31, 36.18, 35.81, 35.49, 35.47, 34.02, 32.00, 31.09, 28.62, 28.25, 28.03, 27.46, 24.22, 23.85, 22.83, 22.57, 21.21, 18.68, 12.23, 12.08.

HRMS (ESI-TOF): calcd. for  $[\text{C}_{36}\text{H}_{56}\text{O}_2 + \text{Na}]^+$  543.4177, found 543.4189.

(3S,8S,9S,10R,13R,14S,17R)-10,13-Dimethyl-17-((R)-6-methylheptan-2-yl)-2,3,4,7,8,9,10,11,12,13,14,15,16,17-tetradecahydro-1H-cyclopenta[a]phenanthren-3-yl acetate (**80**)

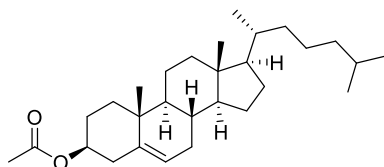

$^1\text{H NMR}$  (300 MHz,  $\text{CDCl}_3$ )  $\delta$  5.30 (d,  $J = 5.0$  Hz, 1H), 4.60 – 4.46 (m, 1H), 2.25 (d,  $J = 6.8$  Hz, 2H), 1.95 (s, 3H), 1.82 – 1.73 (m, 3H), 1.57 – 0.98 (m, 22H), 0.95 (s, 3H), 0.87 – 0.76 (m, 10H), 0.61 (s, 3H).

$^{13}\text{C NMR}$  (75 MHz,  $\text{CDCl}_3$ )  $\delta$  170.40, 139.61, 122.63, 73.93, 56.69, 56.16, 50.04, 42.31, 39.74, 39.53, 38.13, 37.01, 36.58, 36.21, 35.82, 31.90, 31.86, 28.25, 28.01, 27.78, 24.29, 23.86, 22.84, 22.59, 21.41, 21.05, 19.31, 18.73, 11.86.

(3S,8R,9S,10R,13S,14S)-10,13-Dimethyl-17-oxo-2,3,4,7,8,9,10,11,12,13,14,15,16,17-tetradecahydro-1H-cyclopenta[a]phenanthren-3-yl acetate (**81**)

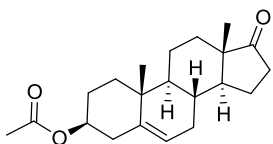

$^1\text{H NMR}$  (300 MHz,  $\text{CDCl}_3$ )  $\delta$  5.43 – 5.35 (m, 1H), 4.67 – 4.52 (m, 1H), 2.51 – 2.41 (m, 1H), 2.37 – 2.29 (m, 2H), 2.15 – 2.05 (m, 2H), 2.03 (s, 3H), 1.97 – 1.46 (m, 12H), 1.34 – 1.24 (m, 2H), 1.04 (s, 3H), 0.88 (s, 3H).

$^{13}\text{C NMR}$  (75 MHz,  $\text{CDCl}_3$ )  $\delta$  220.96, 170.47, 139.91, 121.86, 73.69, 51.68, 50.13, 47.50, 38.07, 36.93, 36.72, 35.83, 31.45, 31.40, 30.76, 27.69, 21.87, 21.41, 20.31, 19.33, 13.54.

(3S,8R,9S,10R,13S,14S)-10,13-Dimethyl-17-oxo-2,3,4,7,8,9,10,11,12,13,14,15,16,17-tetradecahydro-1H-cyclopenta[a]phenanthren-3-yl 3-phenylpropanoate (**82**)

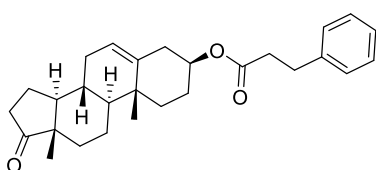

$^1\text{H NMR}$  (300 MHz,  $\text{CDCl}_3$ )  $\delta$  7.35 – 7.18 (m, 5H), 5.42 (d,  $J = 5.0$  Hz, 1H), 4.63 (td,  $J = 11.2, 5.4$  Hz, 1H), 2.97 (t,  $J = 7.8$  Hz, 2H), 2.69 – 2.59 (m, 2H), 2.54 – 2.43 (m, 1H), 2.40 – 2.28 (m, 2H), 2.18 – 2.04 (m, 2H), 2.03 – 1.80 (m, 4H), 1.74 – 1.50 (m, 6H), 1.32 (ddd,  $J = 12.4, 8.3, 4.5$  Hz, 3H), 1.22 – 1.10 (m, 1H), 1.07 (d,  $J = 3.0$  Hz, 3H), 0.91 (s, 3H).

$^{13}\text{C NMR}$  (75 MHz,  $\text{CDCl}_3$ )  $\delta$  221.07, 172.34, 140.58, 139.94, 128.47, 128.34, 126.23, 121.88, 73.77, 50.15, 47.54, 38.09, 38.06, 36.94, 36.74, 36.22, 35.86, 31.48, 31.42, 31.05, 30.79, 27.69, 21.89, 20.33, 19.36, 13.56.

HRMS (ESI-TOF): calcd. for  $[\text{C}_{28}\text{H}_{36}\text{O}_3 + \text{Na}]^+$  443.2556, found 433.2571.

Pregnanolone acetate (**83**)

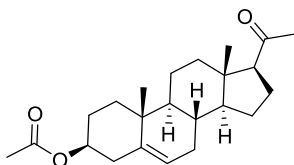

$^1\text{H NMR}$  (300 MHz,  $\text{CDCl}_3$ )  $\delta$  5.38 (dt,  $J = 5.3, 1.5$  Hz, 1H), 4.61 (dt,  $J = 10.5, 5.5, 2.4$  Hz, 1H), 2.54 (t,  $J = 8.7$  Hz, 1H), 2.39 – 2.28 (m, 2H), 2.24 – 2.11 (m, 4H), 2.08 – 1.95 (m, 5H), 1.92 – 1.81 (m, 2H), 1.72 – 1.39 (m, 8H), 1.26 – 1.09 (m, 3H), 1.02 (d,  $J = 1.2$  Hz, 4H), 0.63 (d,  $J = 1.3$  Hz, 3H).

$^{13}\text{C NMR}$  (75 MHz,  $\text{CDCl}_3$ )  $\delta$  209.48, 170.51, 139.65, 122.32, 73.81, 63.66, 56.82, 49.88, 43.97, 38.78, 38.06, 37.00, 36.59, 31.81, 31.75, 31.55, 27.72, 24.48, 22.81, 21.43, 21.03, 19.30, 13.22.

Butyl (S)-4-((2-(6-methoxynaphthalen-2-yl)propanoyl)oxy)butanoate (**84**)

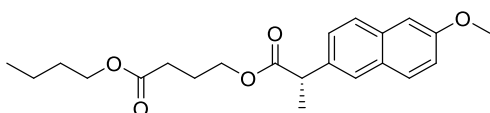

$^1\text{H NMR}$  (300 MHz,  $\text{CDCl}_3$ )  $\delta$  7.66 – 7.56 (m, 3H), 7.32 (dd,  $J = 8.5, 1.9$  Hz, 1H), 7.10 – 7.01 (m, 2H), 4.10 – 3.92 (m, 4H), 3.84 (s, 4H), 2.23 – 2.14 (m, 2H), 1.91 – 1.76 (m, 2H), 1.54 – 1.43 (m, 5H), 1.32 – 1.21 (m, 2H), 0.84 (t,  $J = 7.3$  Hz, 3H).

$^{13}\text{C NMR}$  (75 MHz,  $\text{CDCl}_3$ )  $\delta$  174.59, 172.90, 157.65, 135.66, 133.70, 129.28, 128.94, 127.16, 126.21, 125.92, 118.99, 105.58, 64.39, 63.72, 55.32, 45.46, 30.63, 24.03, 19.12, 18.49, 13.71.

HRMS (ESI-TOF): calcd. for  $[\text{C}_{22}\text{H}_{28}\text{O}_5 + \text{Na}]^+$  395.1829, found 395.1834.

Phenyl 4-(3,7-dimethyl-2,6-dioxo-2,3,6,7-tetrahydro-1H-purin-1-yl)butanoate (**85**)

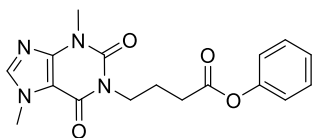

$^1\text{H}$  NMR (300 MHz,  $\text{CDCl}_3$ )  $\delta$  7.53 (t,  $J = 1.1$  Hz, 1H), 7.42 – 7.34 (m, 2H), 7.26 – 7.19 (m, 1H), 7.16 – 7.05 (m, 2H), 4.19 (t,  $J = 6.9$  Hz, 2H), 4.01 – 4.00 (m, 3H), 3.60 (d,  $J = 1.2$  Hz, 3H), 2.67 (t,  $J = 7.5$  Hz, 2H), 2.19 – 2.13 (m, 2H).

$^{13}\text{C}$  NMR (75 MHz,  $\text{CDCl}_3$ )  $\delta$  171.43, 155.32, 151.57, 150.76, 148.88, 141.51, 129.37, 125.72, 121.59, 107.63, 40.42, 33.61, 31.86, 29.74, 23.35.

HRMS (ESI-TOF): calcd. for  $[\text{C}_{17}\text{H}_{18}\text{N}_4\text{O}_4+\text{H}]^+$  343.1406, found 343.1402.

## References

- [1] Han-Jun Ai, Hai Wang, Chong-Liang Li, Xiao-Feng Wu, *ACS Catal.*, **2020**, 10, 5147-5152.
- [2] Takahide Fukuyama, Takaya Inouye, Ilhyong Ryu, *J. Organomet. Chem.*, **2007**, 692, 685-690.
- [3] Dominic R. Pye, Li-Jie Cheng, Neal P. Mankad, *Chem. Sci.*, **2017**, 8, 4750-4755.
- [4] Siling Zhao, Neal P. Mankad, *Angew. Chem. Int. Ed.*, **2018**, 57, 5867-5870.
- [5] Yan-Chi Chen, Lei Su, He-Gui Gong, *Org. Lett.*, **2019**, 21, 4689-4693.
- [6] Li-Jie Cheng, Neal P. Mankad, *J. Am. Chem. Soc.*, **2020**, 142, 80-84.
- [7] Khaled E. Hashem, James B. Woell, Howard Alper, *Tetrahedron Lett.*, **1984**, 25, 4879-4880.
- [8] Brendon T. Sargent, Erik J. Alexanian, *J. Am. Chem. Soc.*, **2016**, 138, 7520-7523.
- [9] Ya-Hui Li, Xiao-Feng Wu, *Commun. Chem.*, **2018**, 1, 39.

# NMR Spectra

Butyl 3-phenylpropanoate (3)

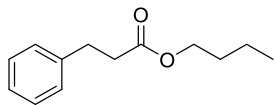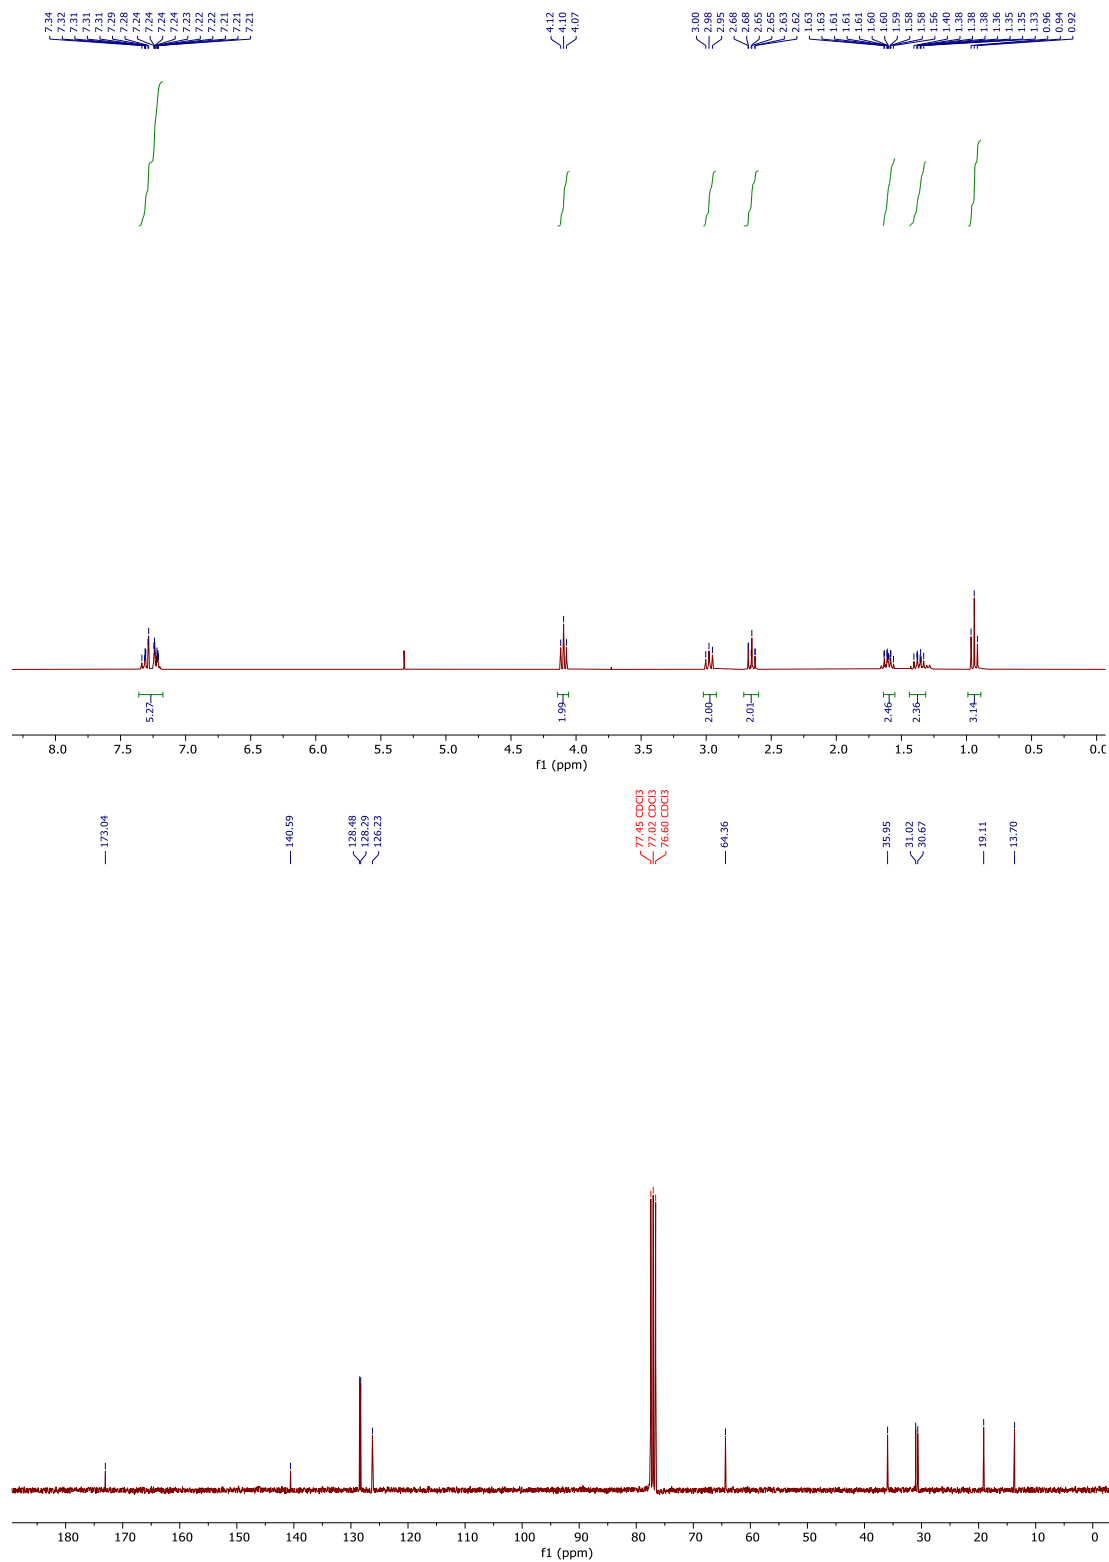

Methyl 3-phenylpropanoate (6)

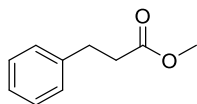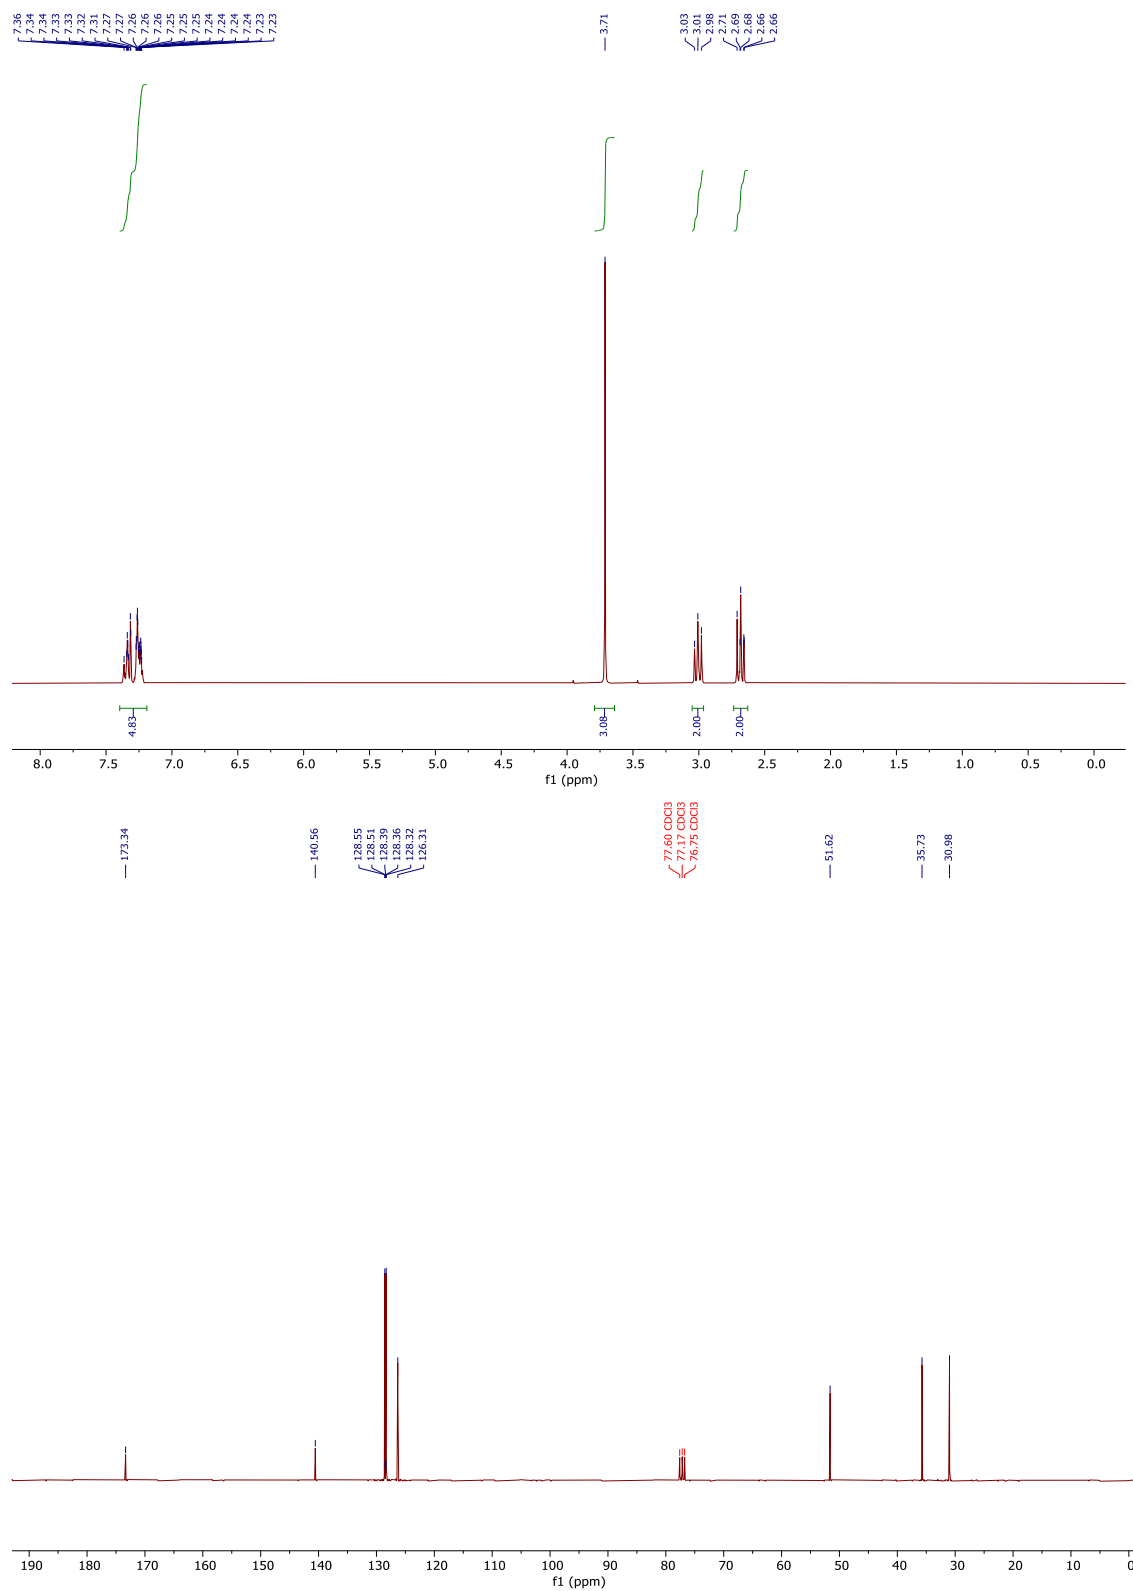

Ethyl 3-phenylpropanoate (7)

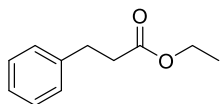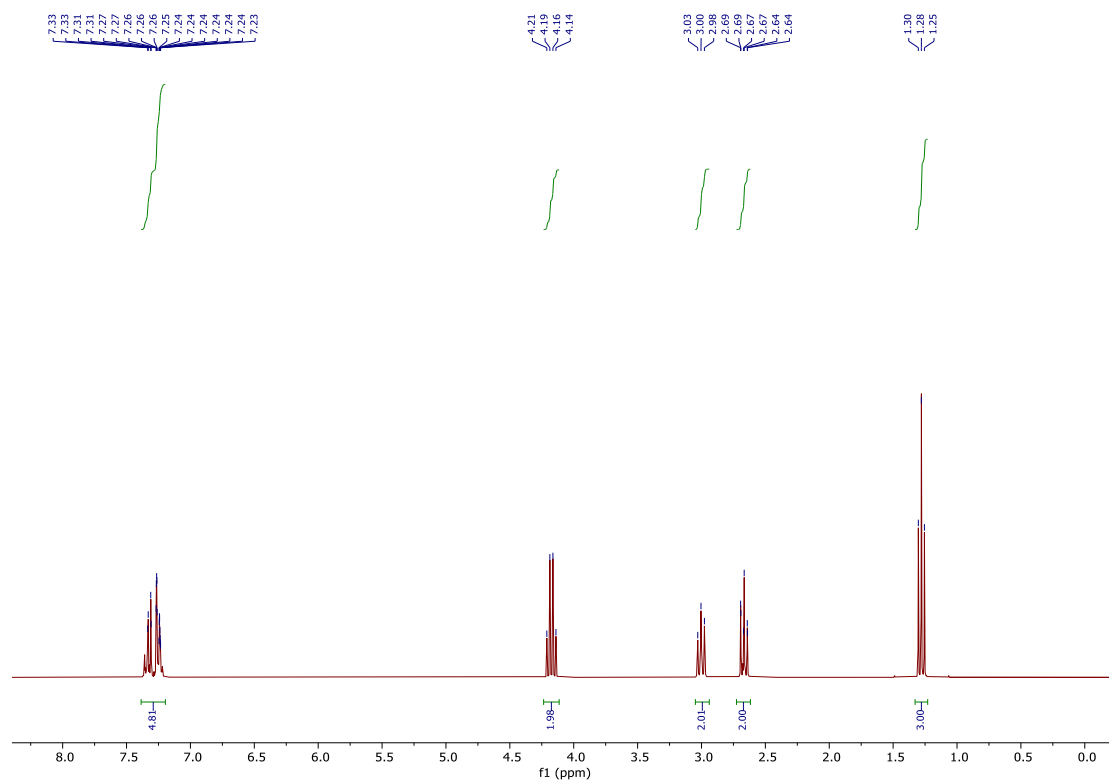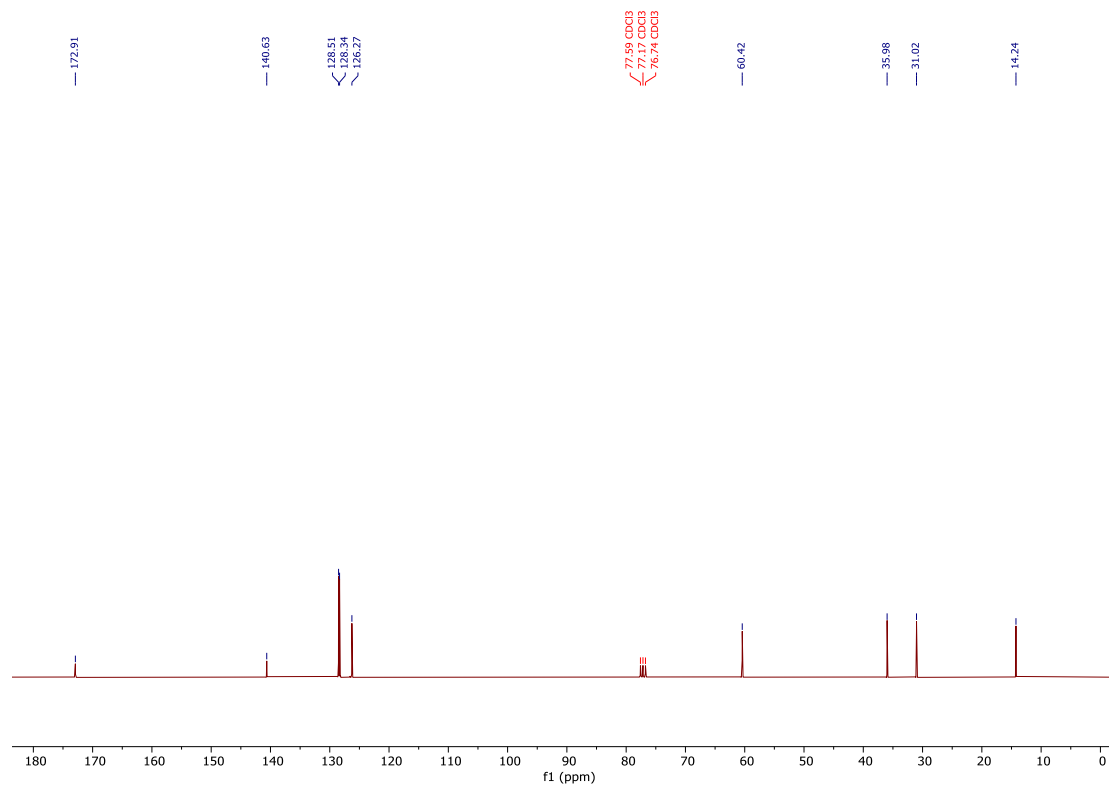



Propyl 3-phenylpropanoate (8)

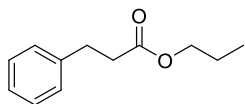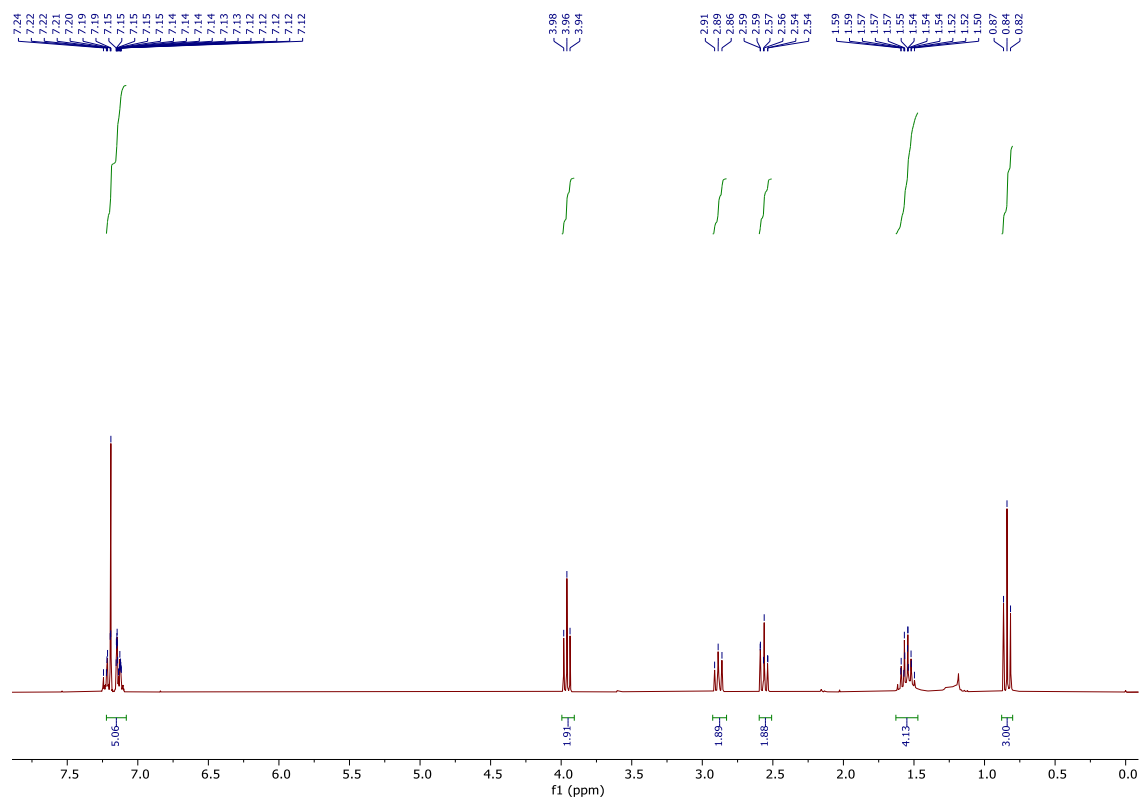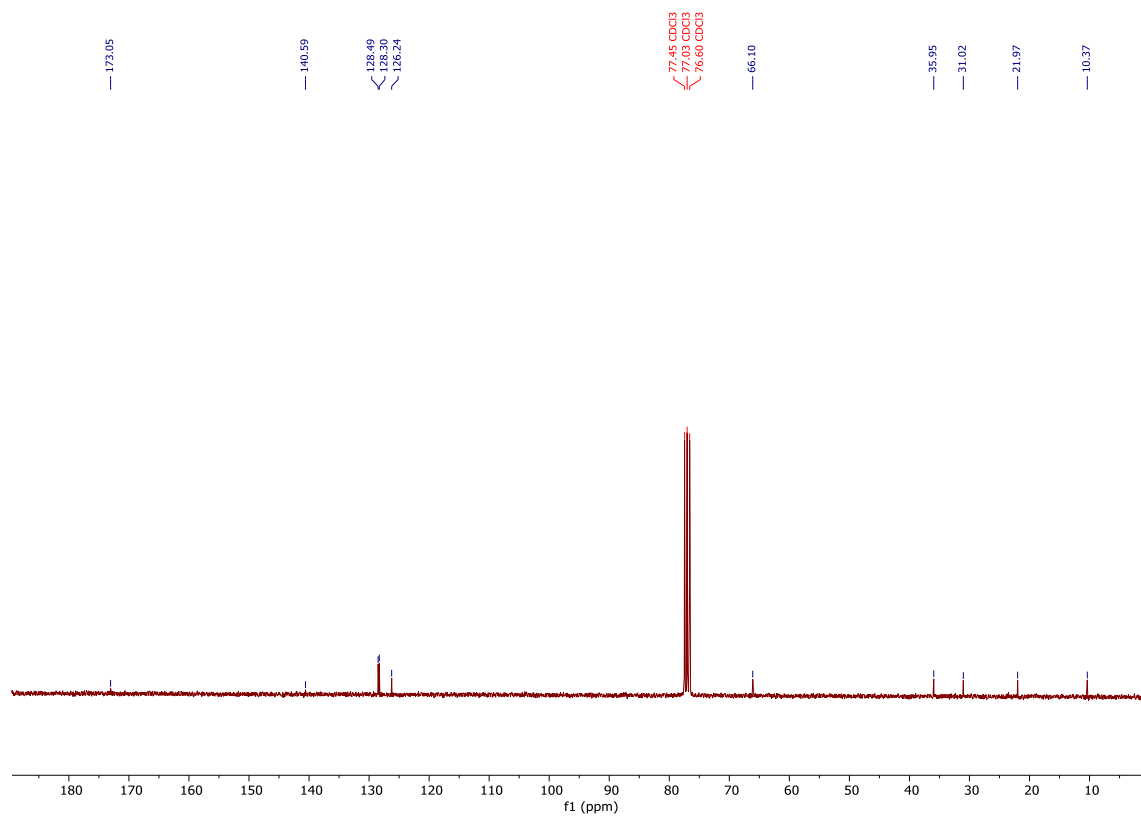

Octyl 3-phenylpropanoate (9)

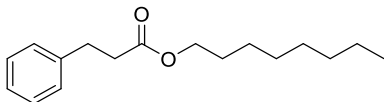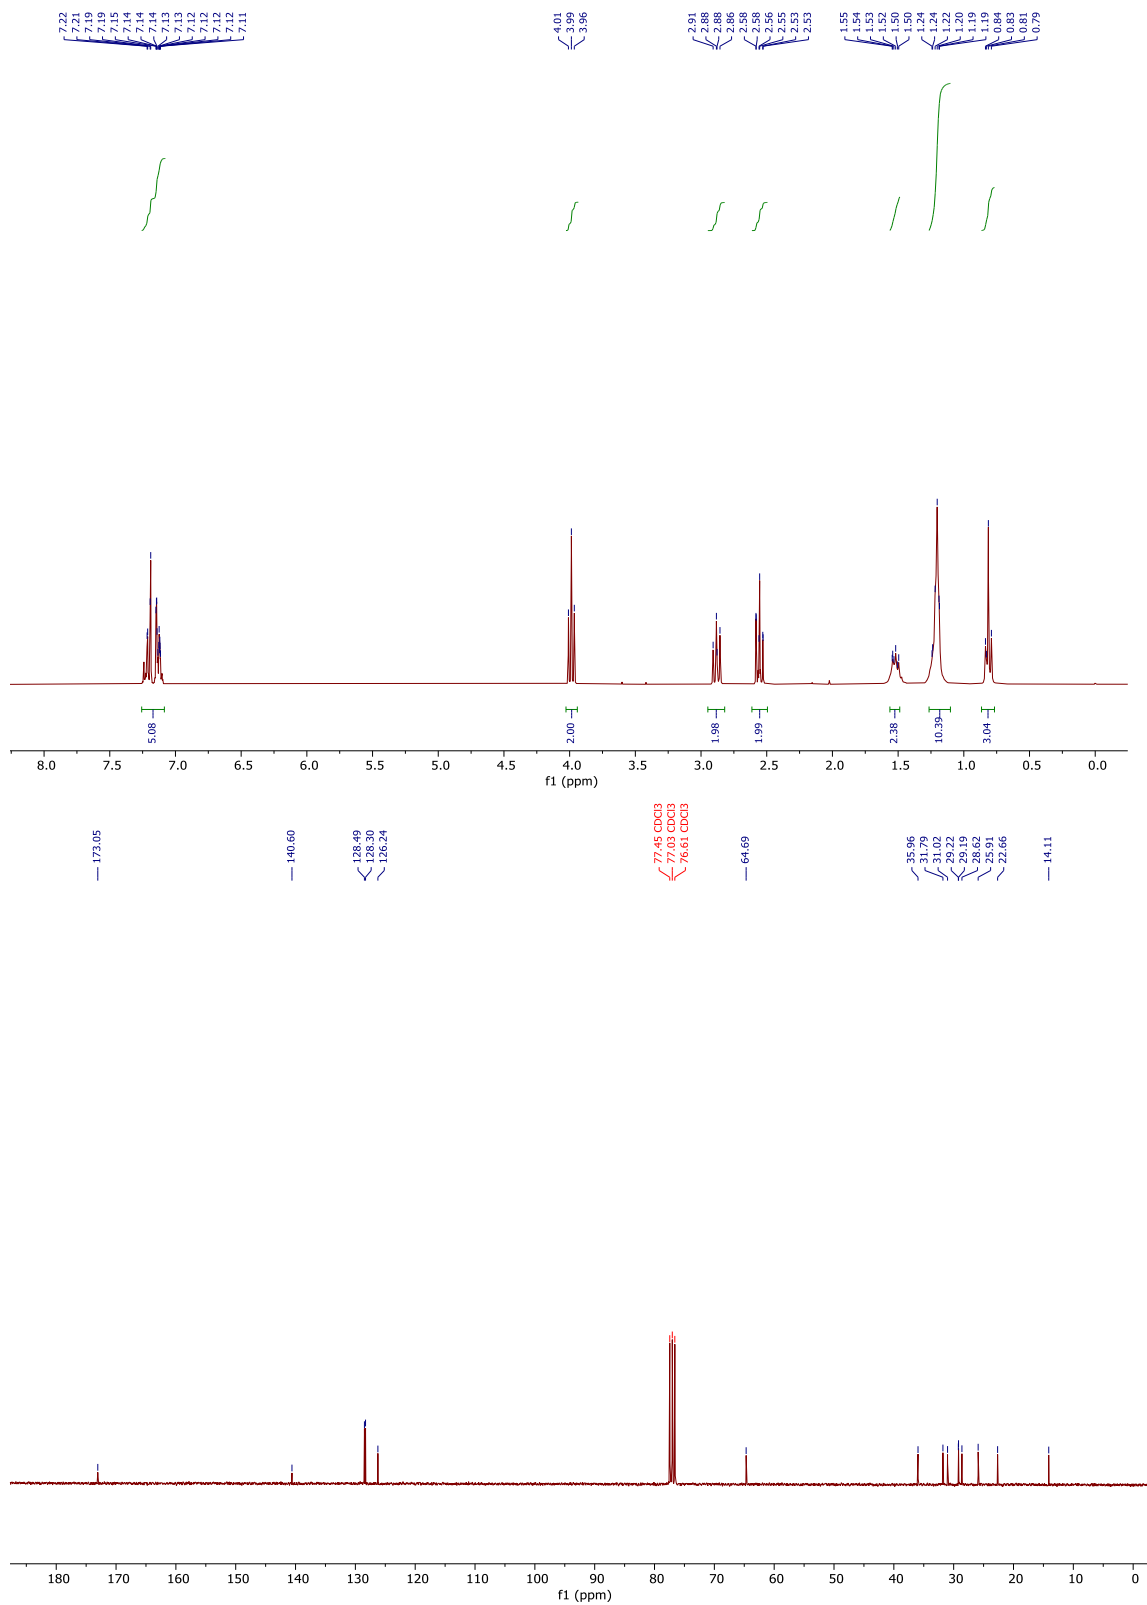

Decyl 3-phenylpropanoate (**10**)

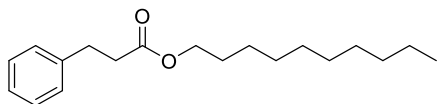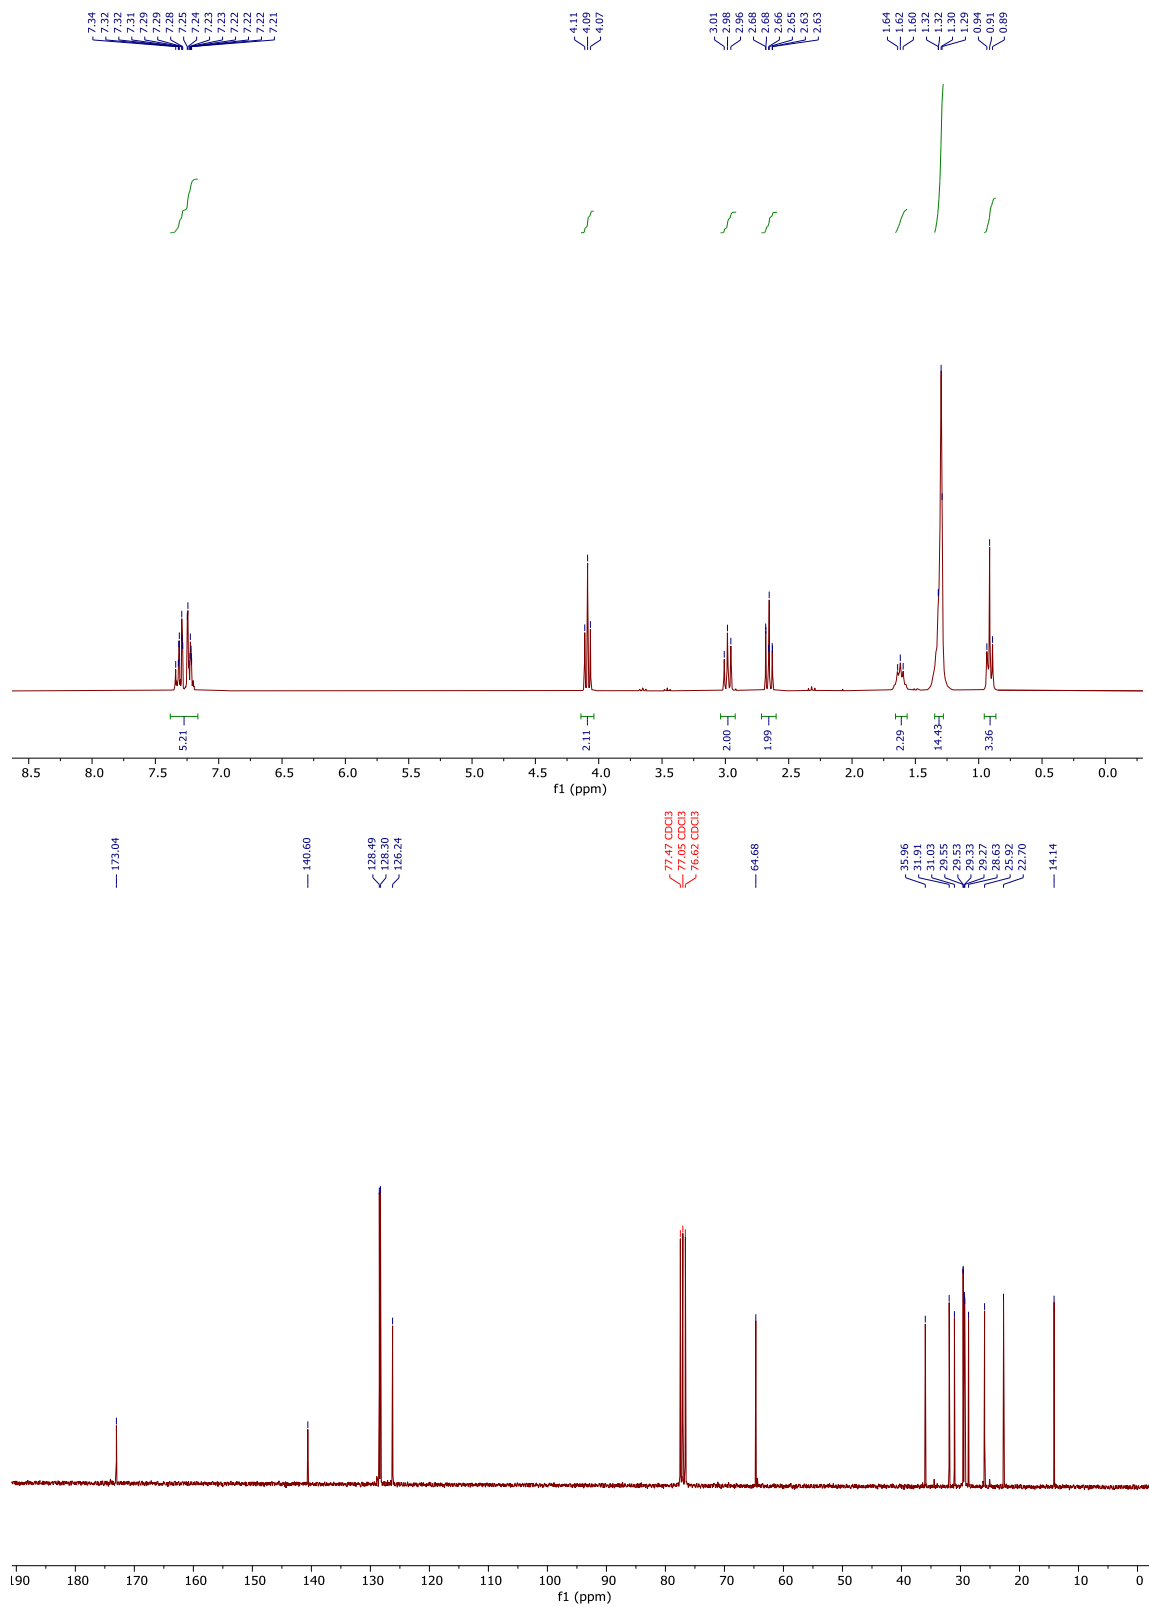

Cyclobutylmethyl 3-phenylpropanoate (**11**)

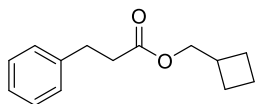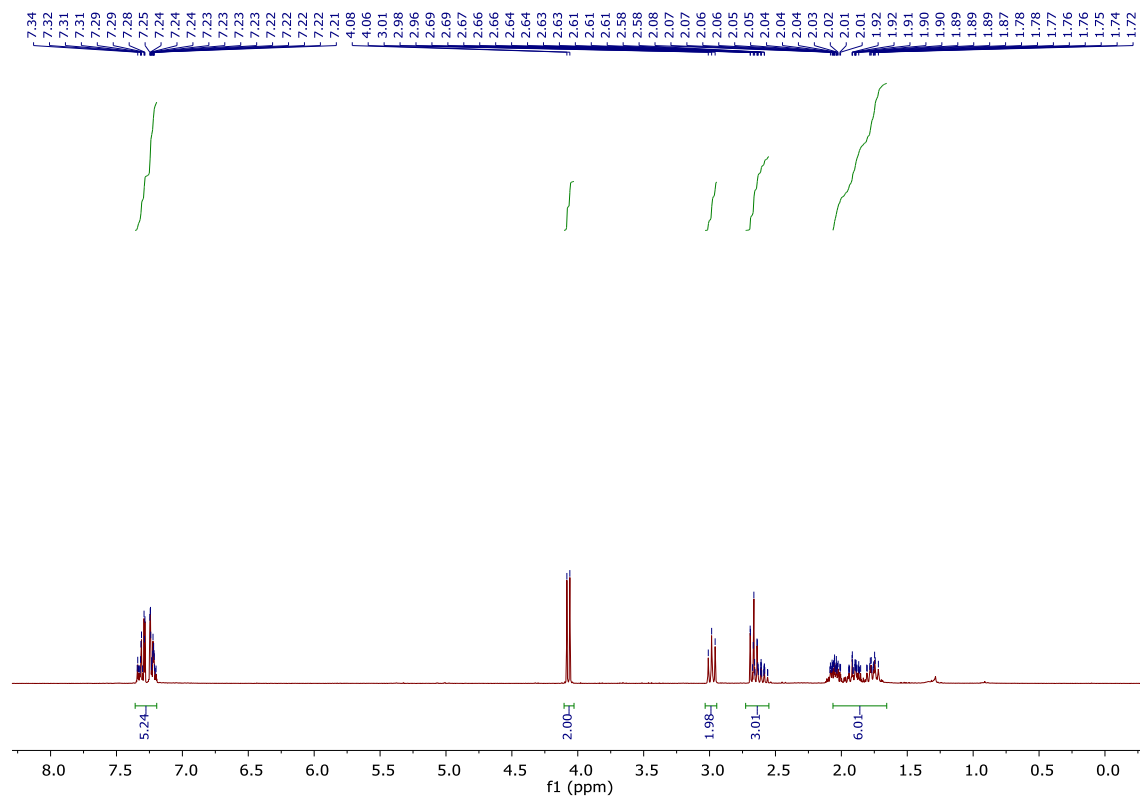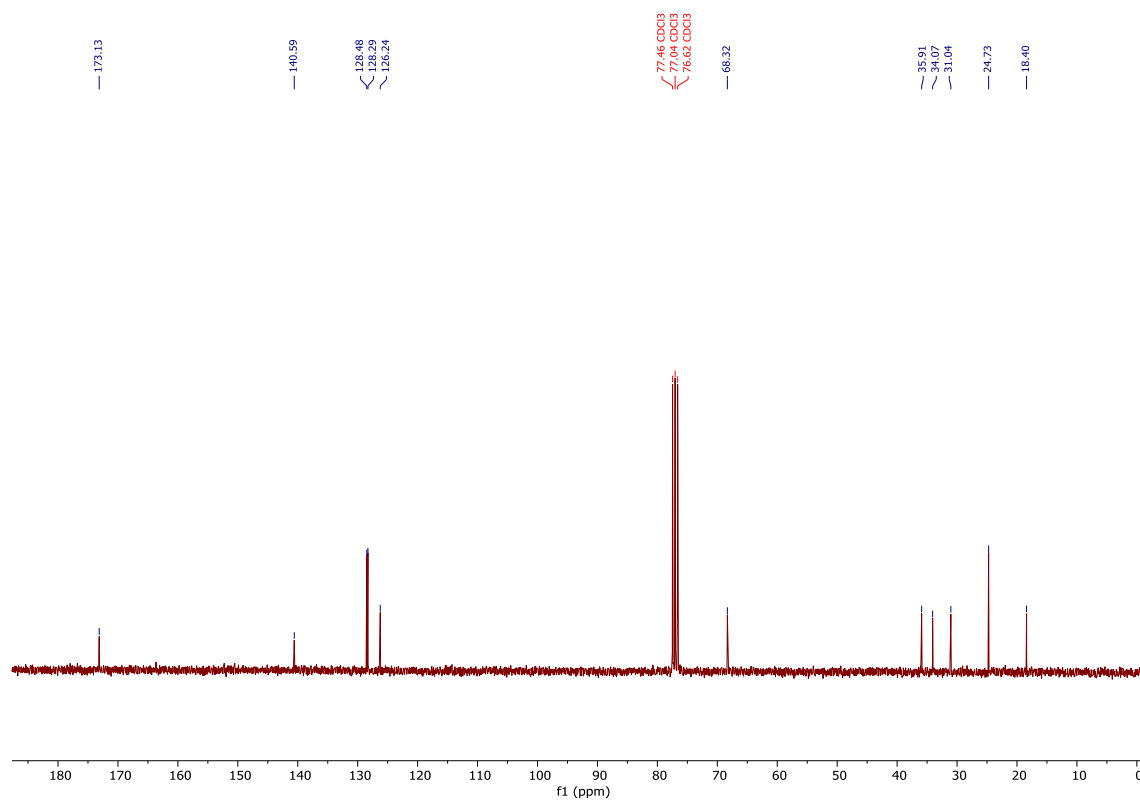

Cyclohexylmethyl 3-phenylpropanoate (**12**)

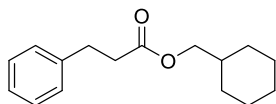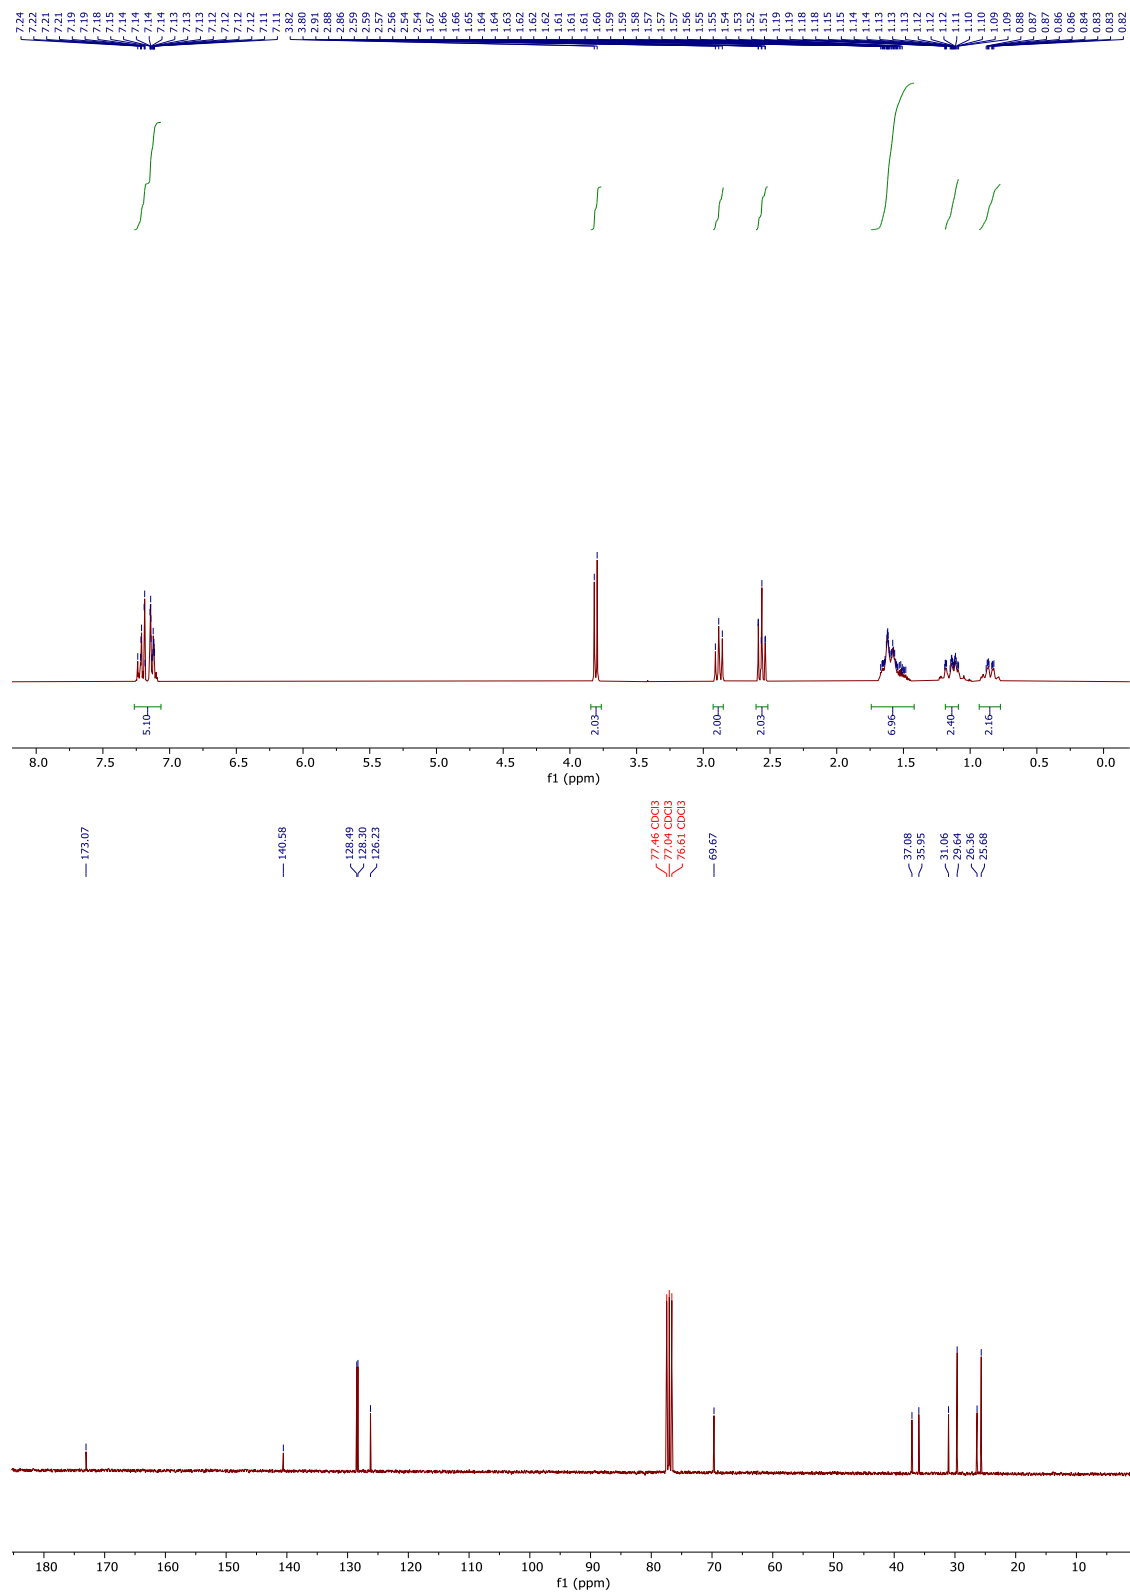

Phenethyl 3-phenylpropanoate (13)

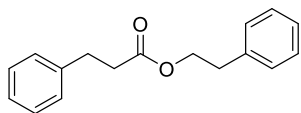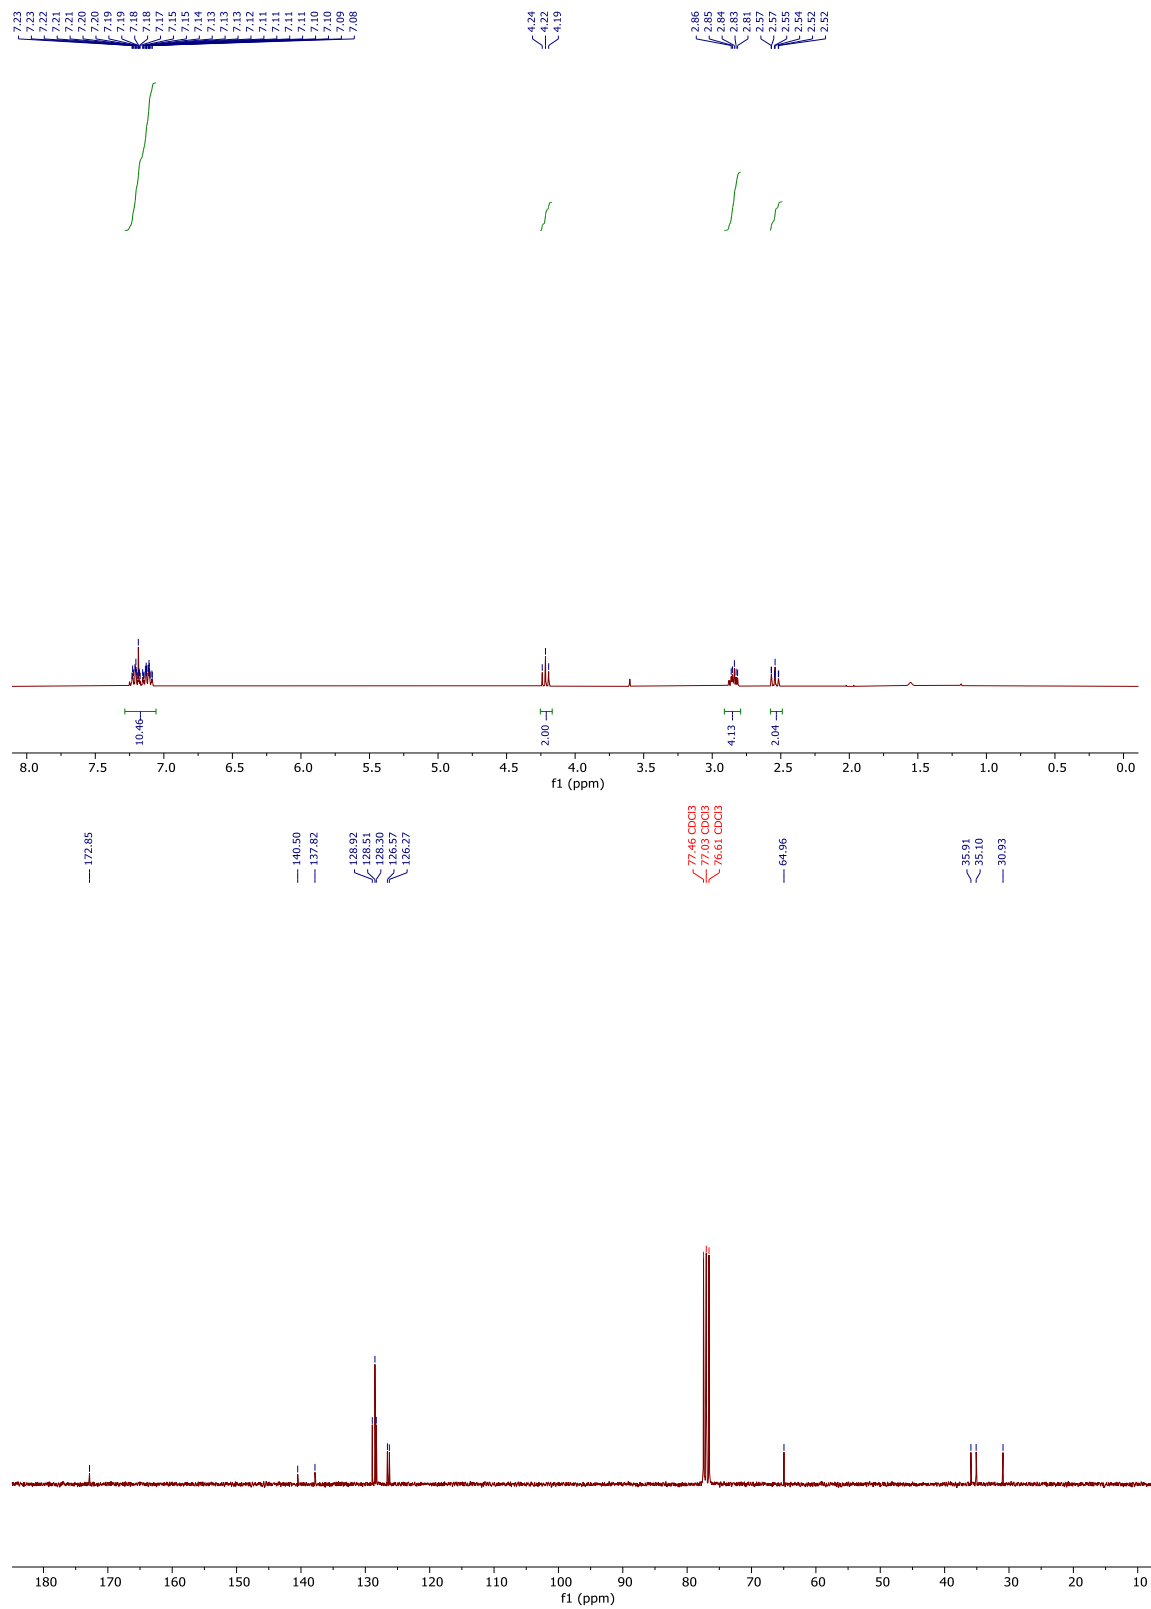

Benzyl 3-phenylpropanoate (**14**)

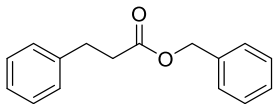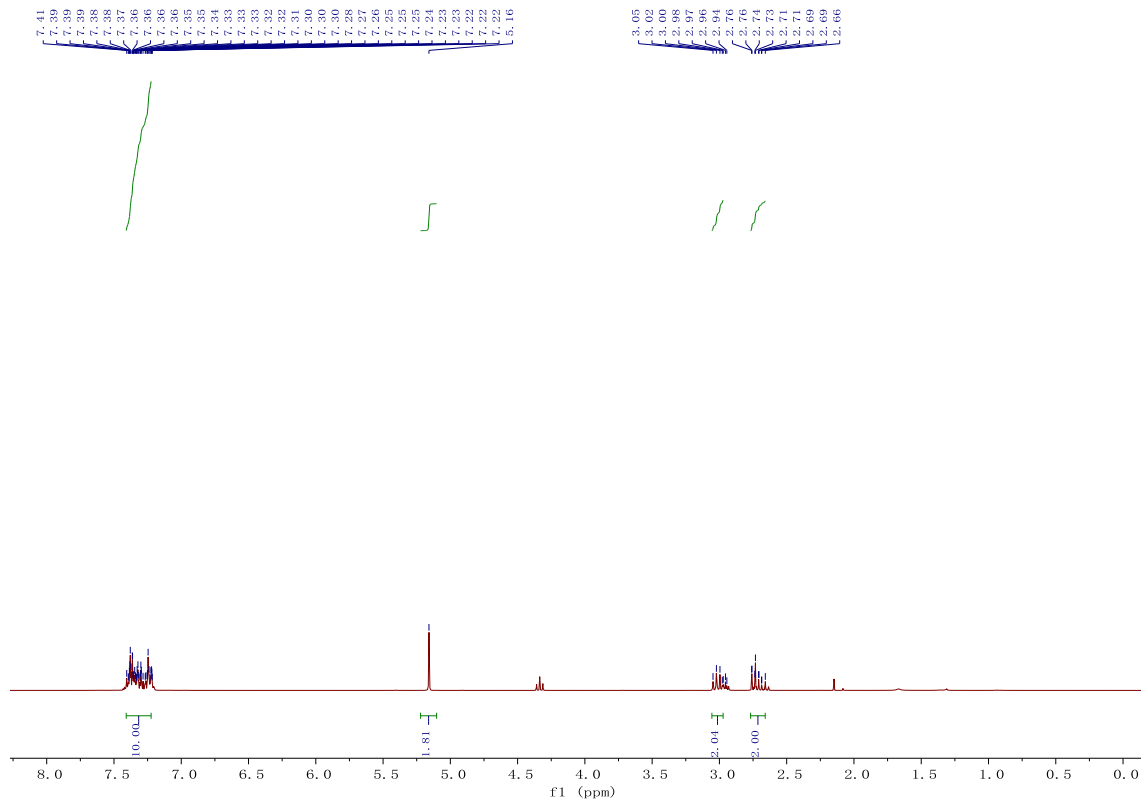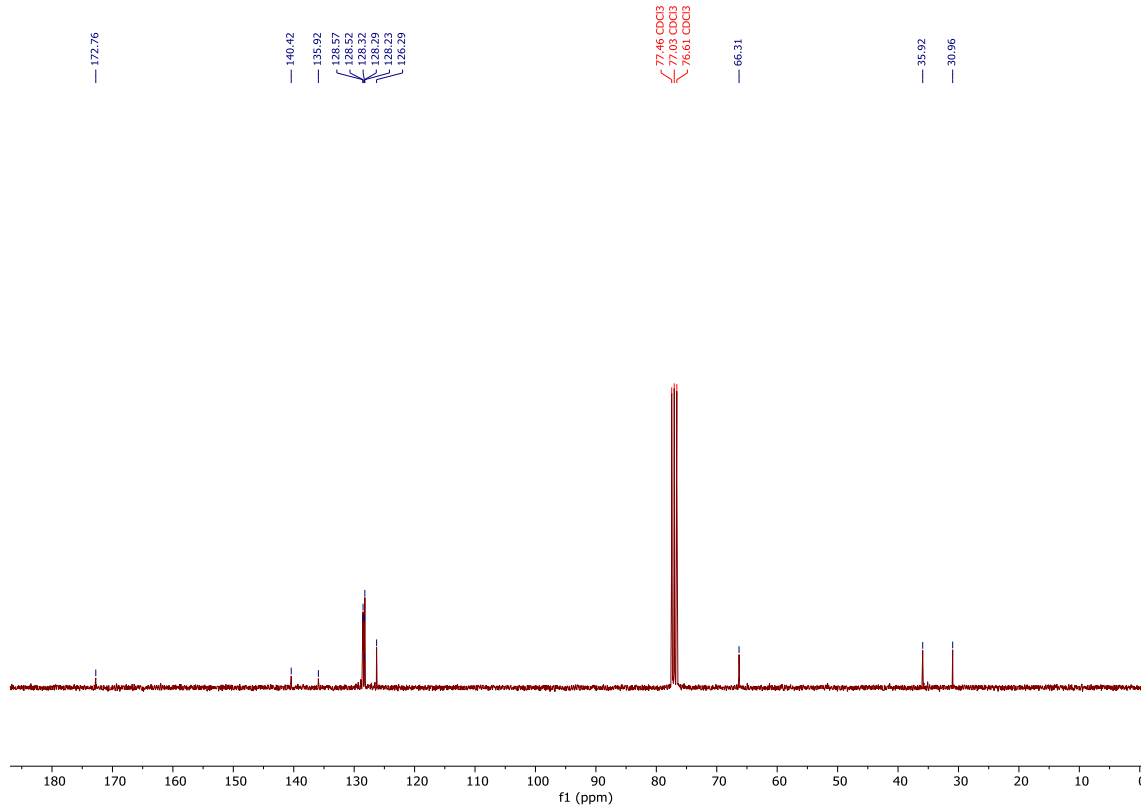

4-Fluorobenzyl 3-phenylpropanoate (15)

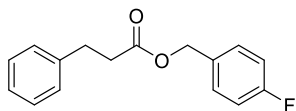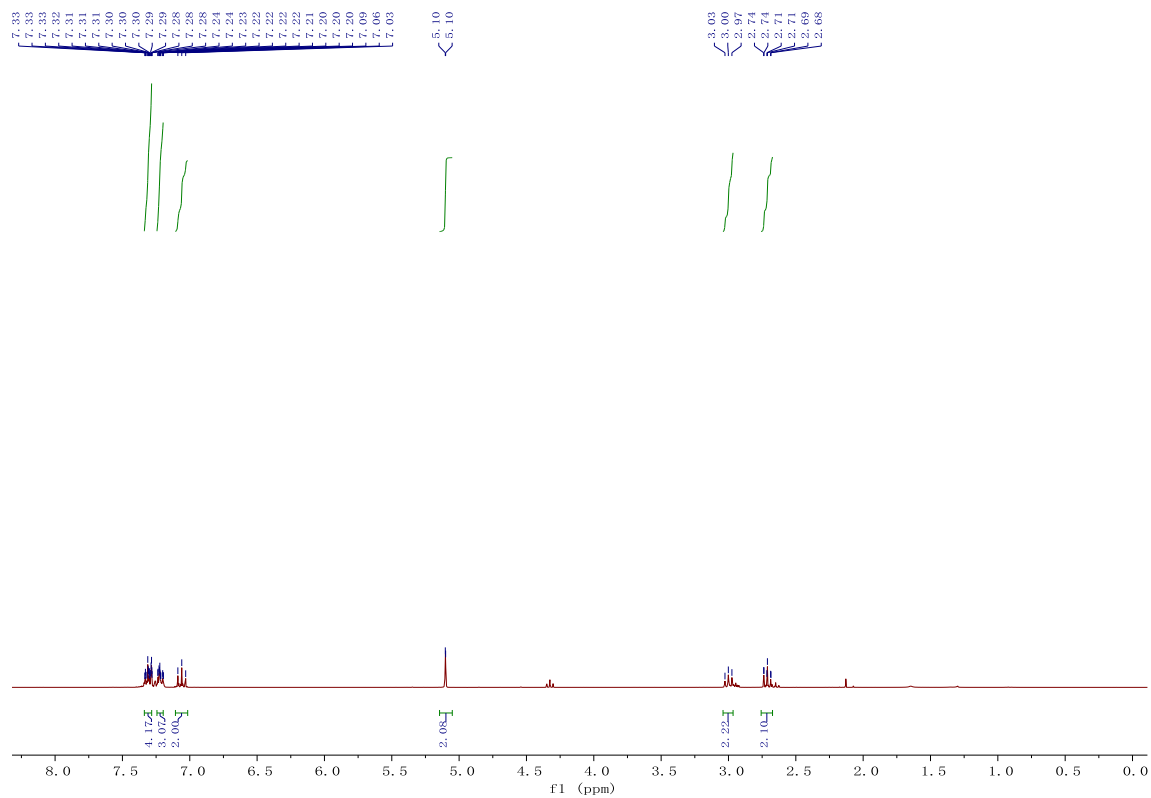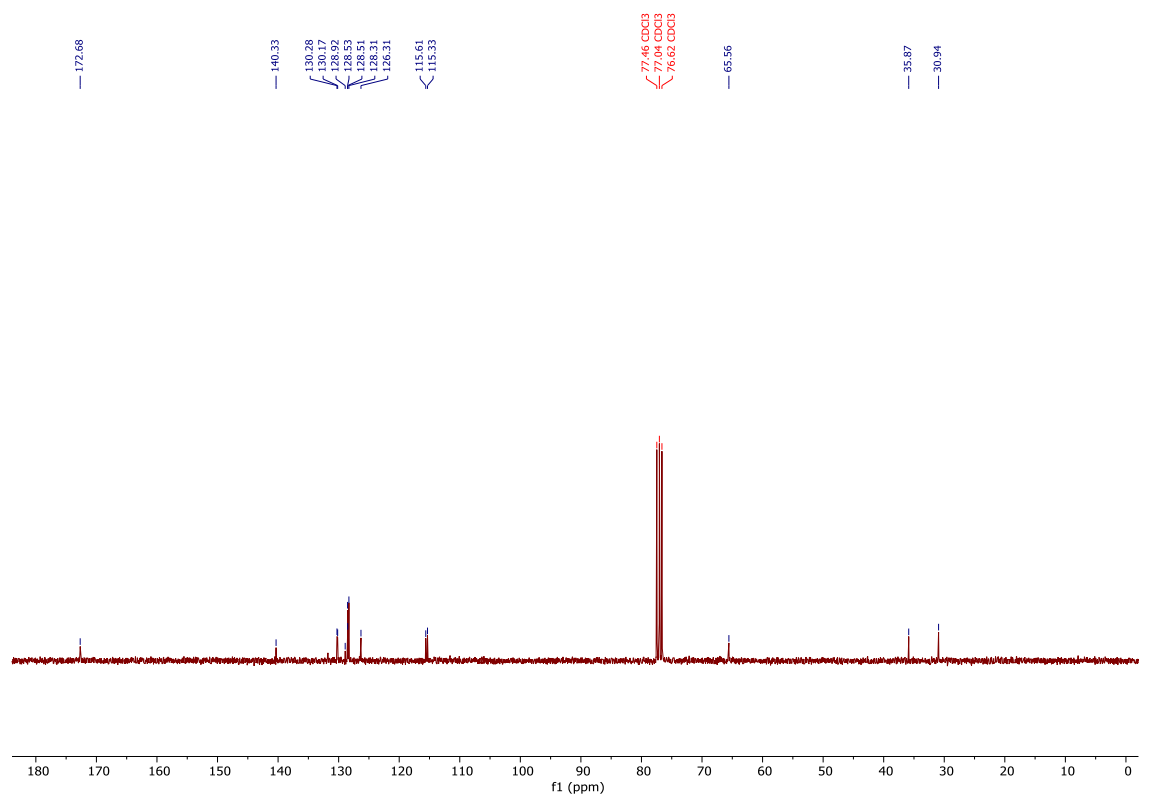



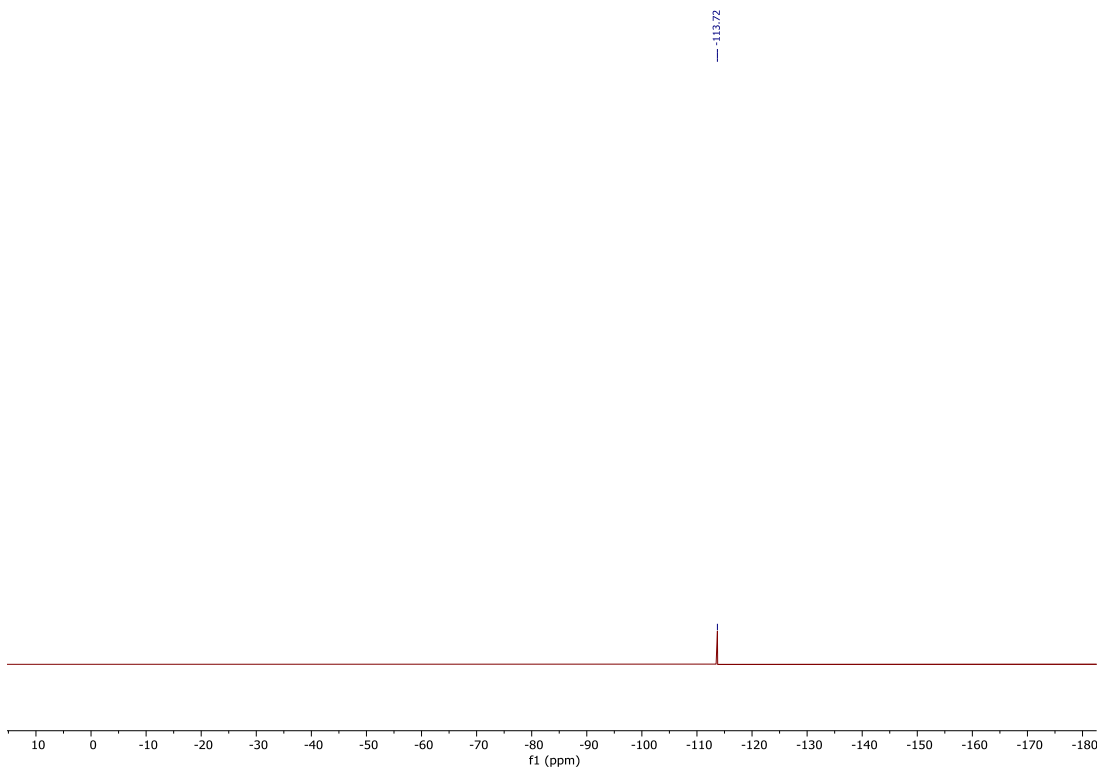

3,4-Dimethoxybenzyl 3-phenylpropanoate (**16**)

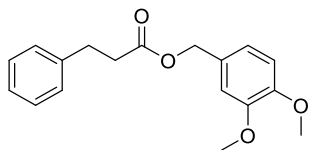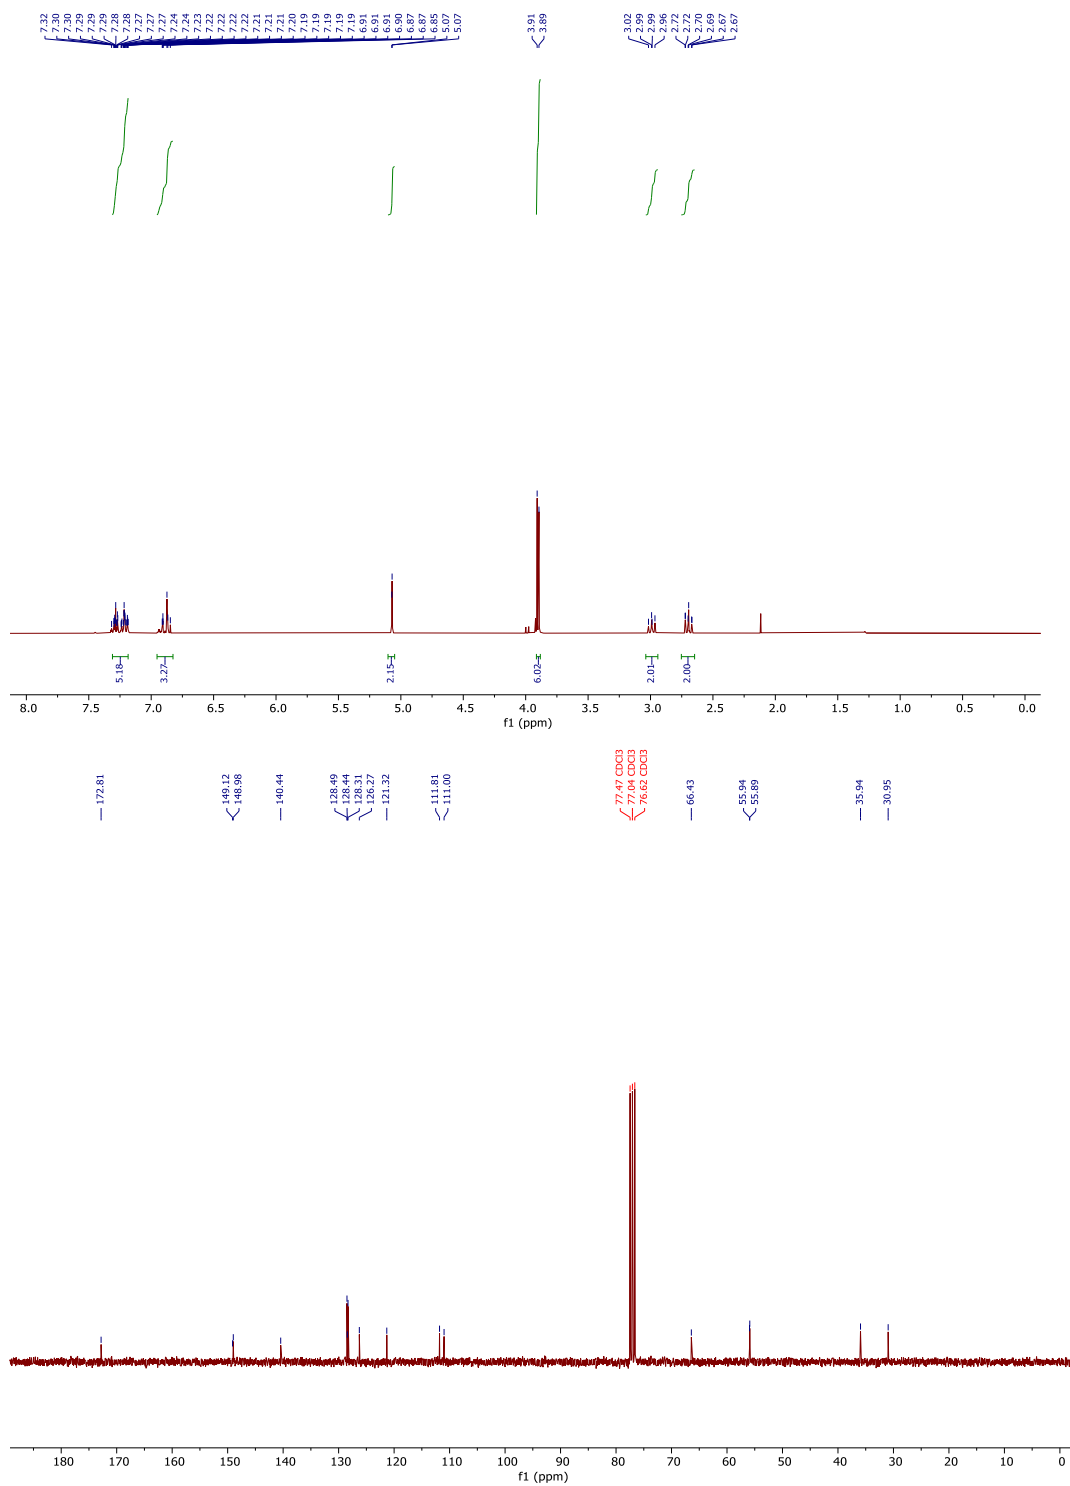

3,5-Dimethoxybenzyl 3-phenylpropanoate (**17**)

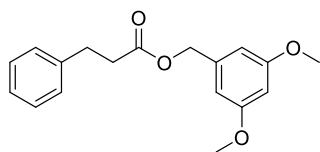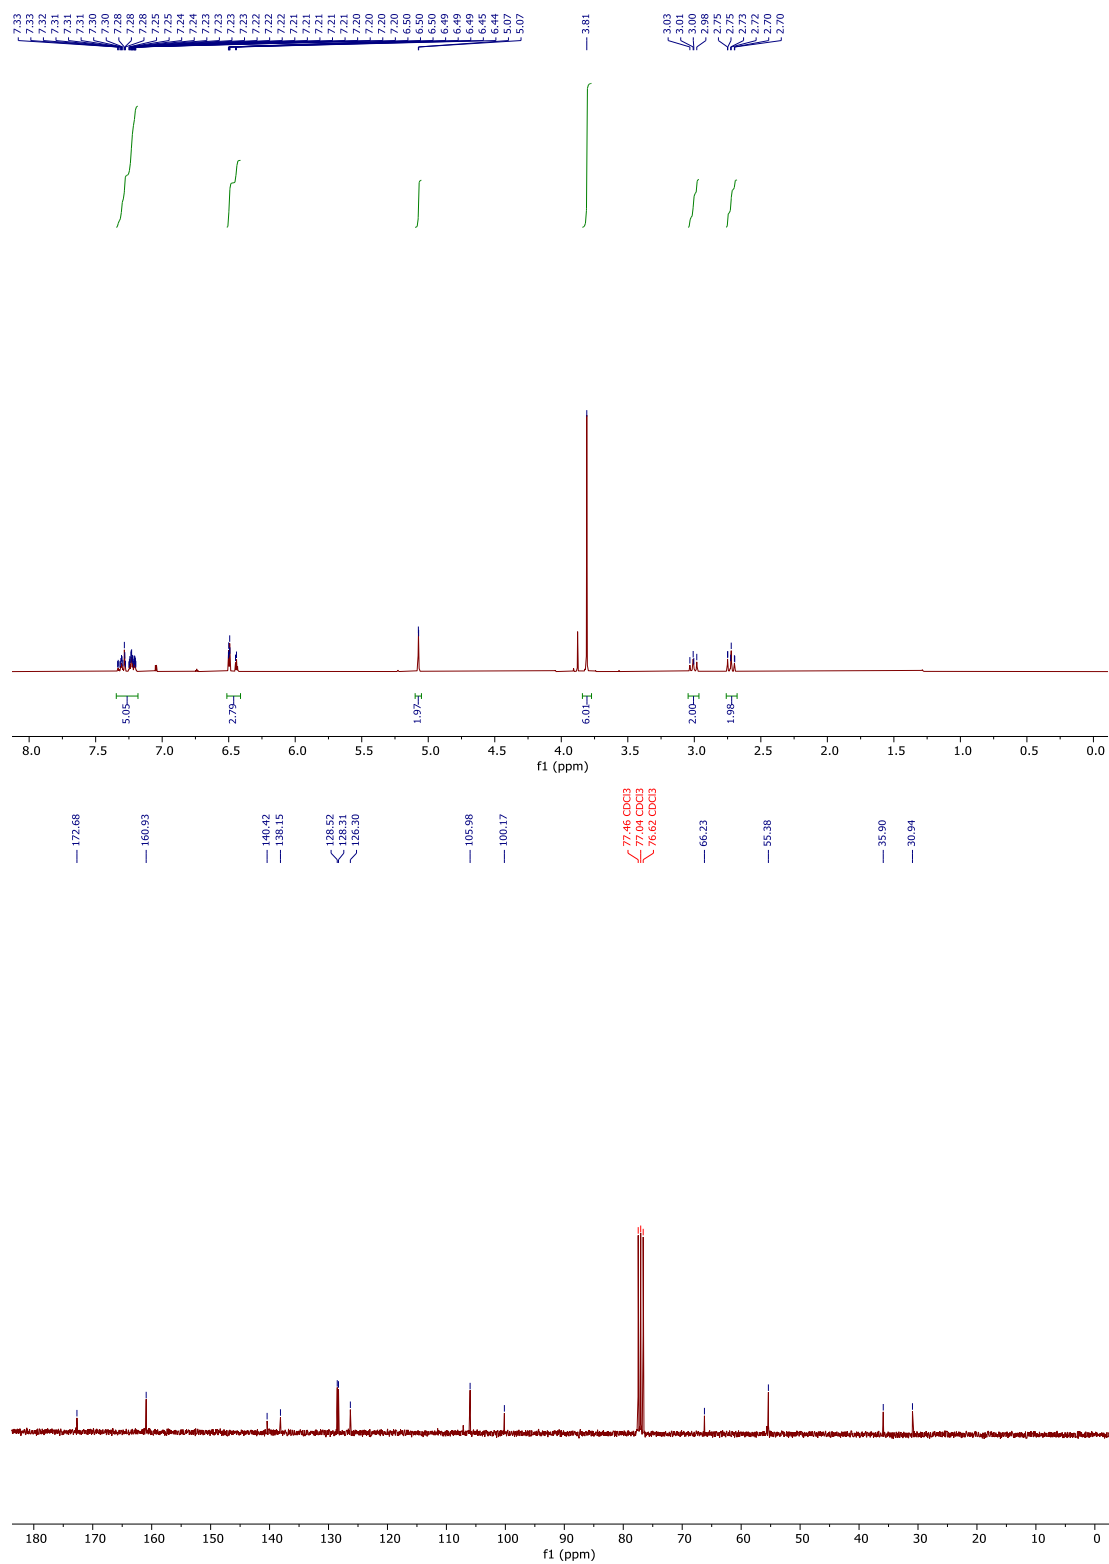

3,4,5-Trimethoxybenzyl 3-phenylpropanoate (**18**)

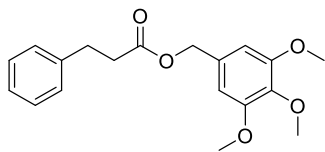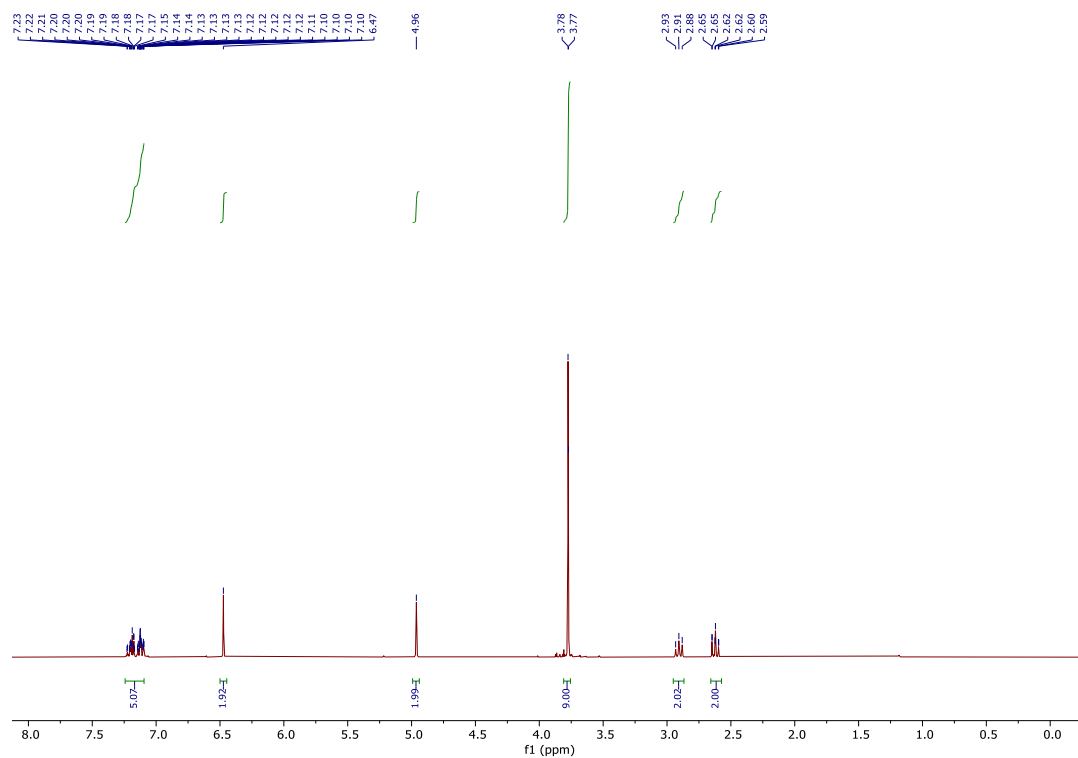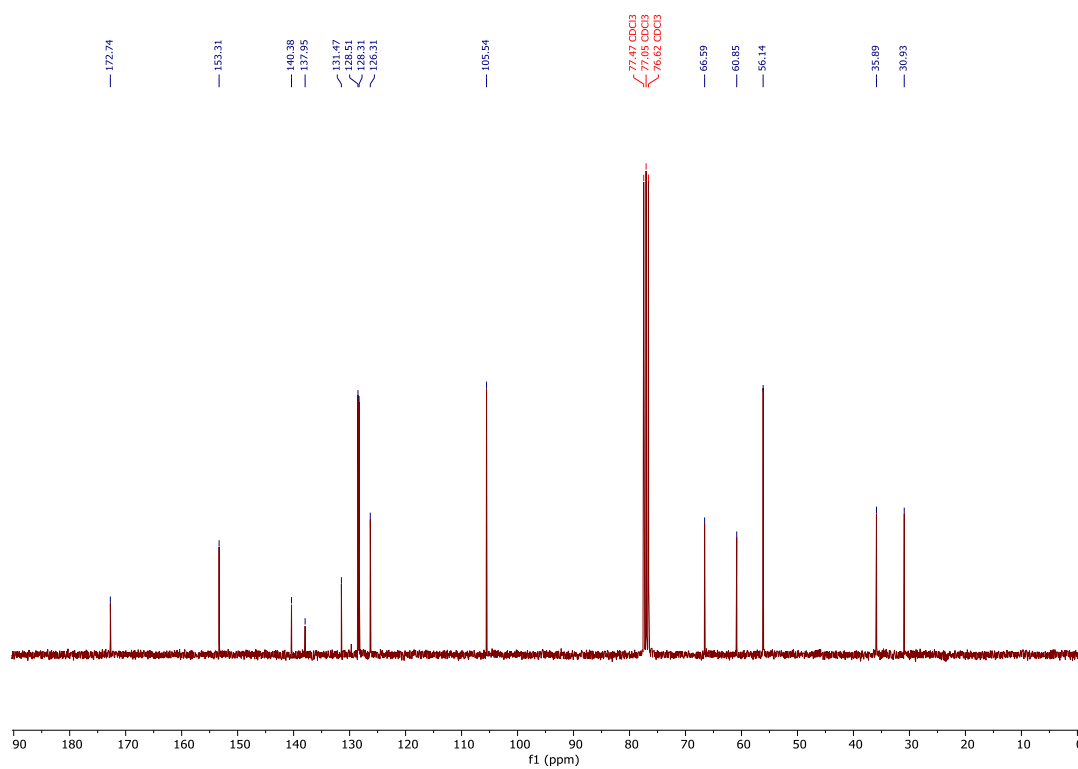

Benzo[d][1,3]dioxol-5-ylmethyl 3-phenylpropanoate (**19**)

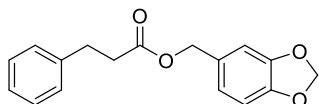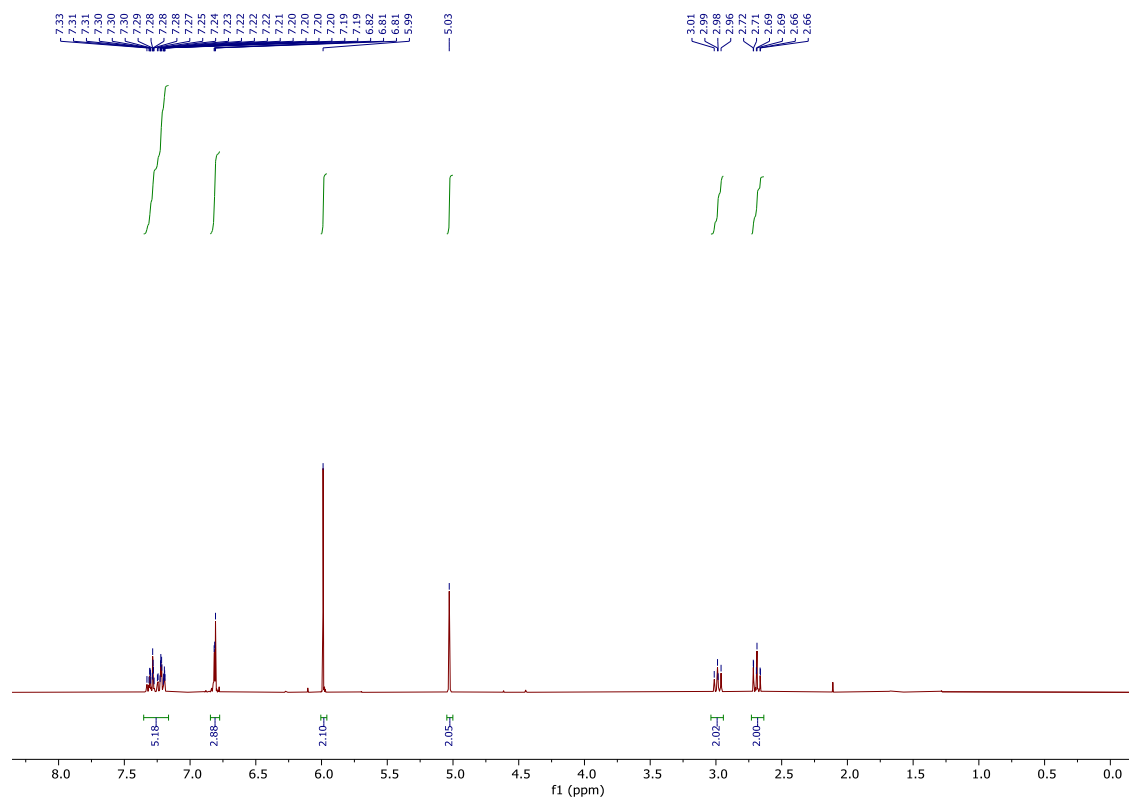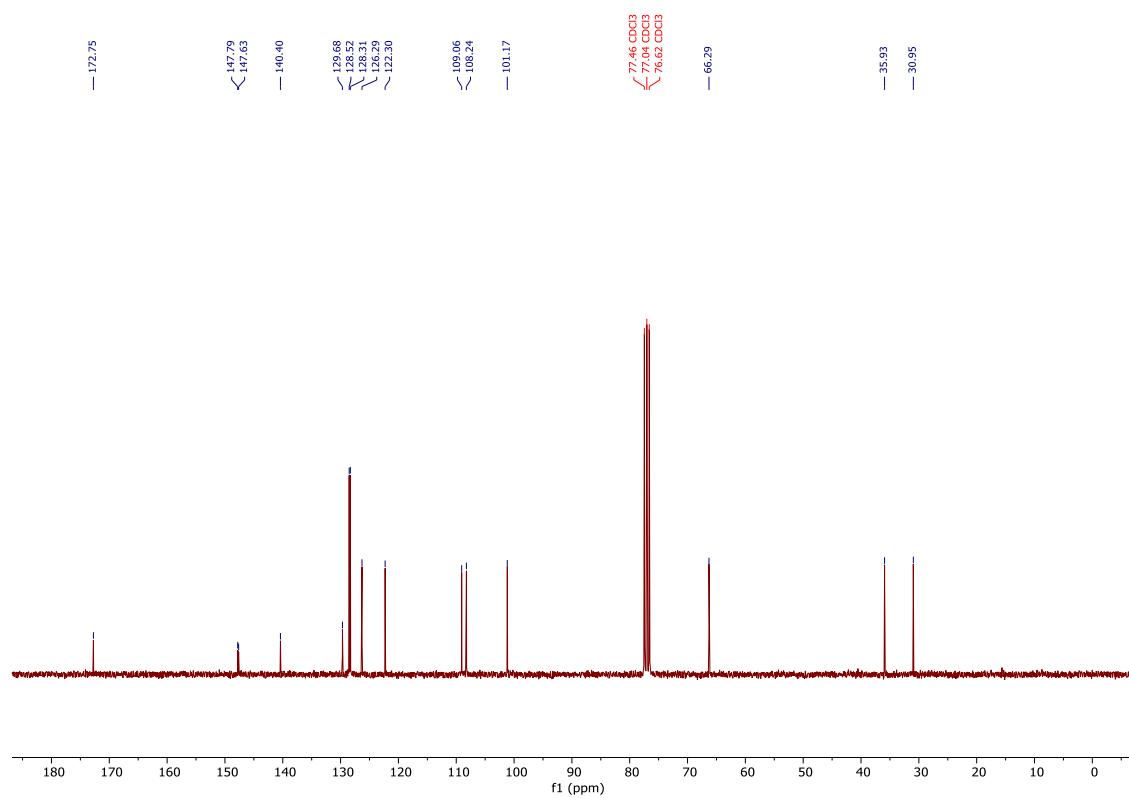

4-(Benzyloxy)benzyl 3-phenylpropanoate (**20**)

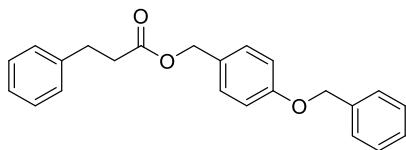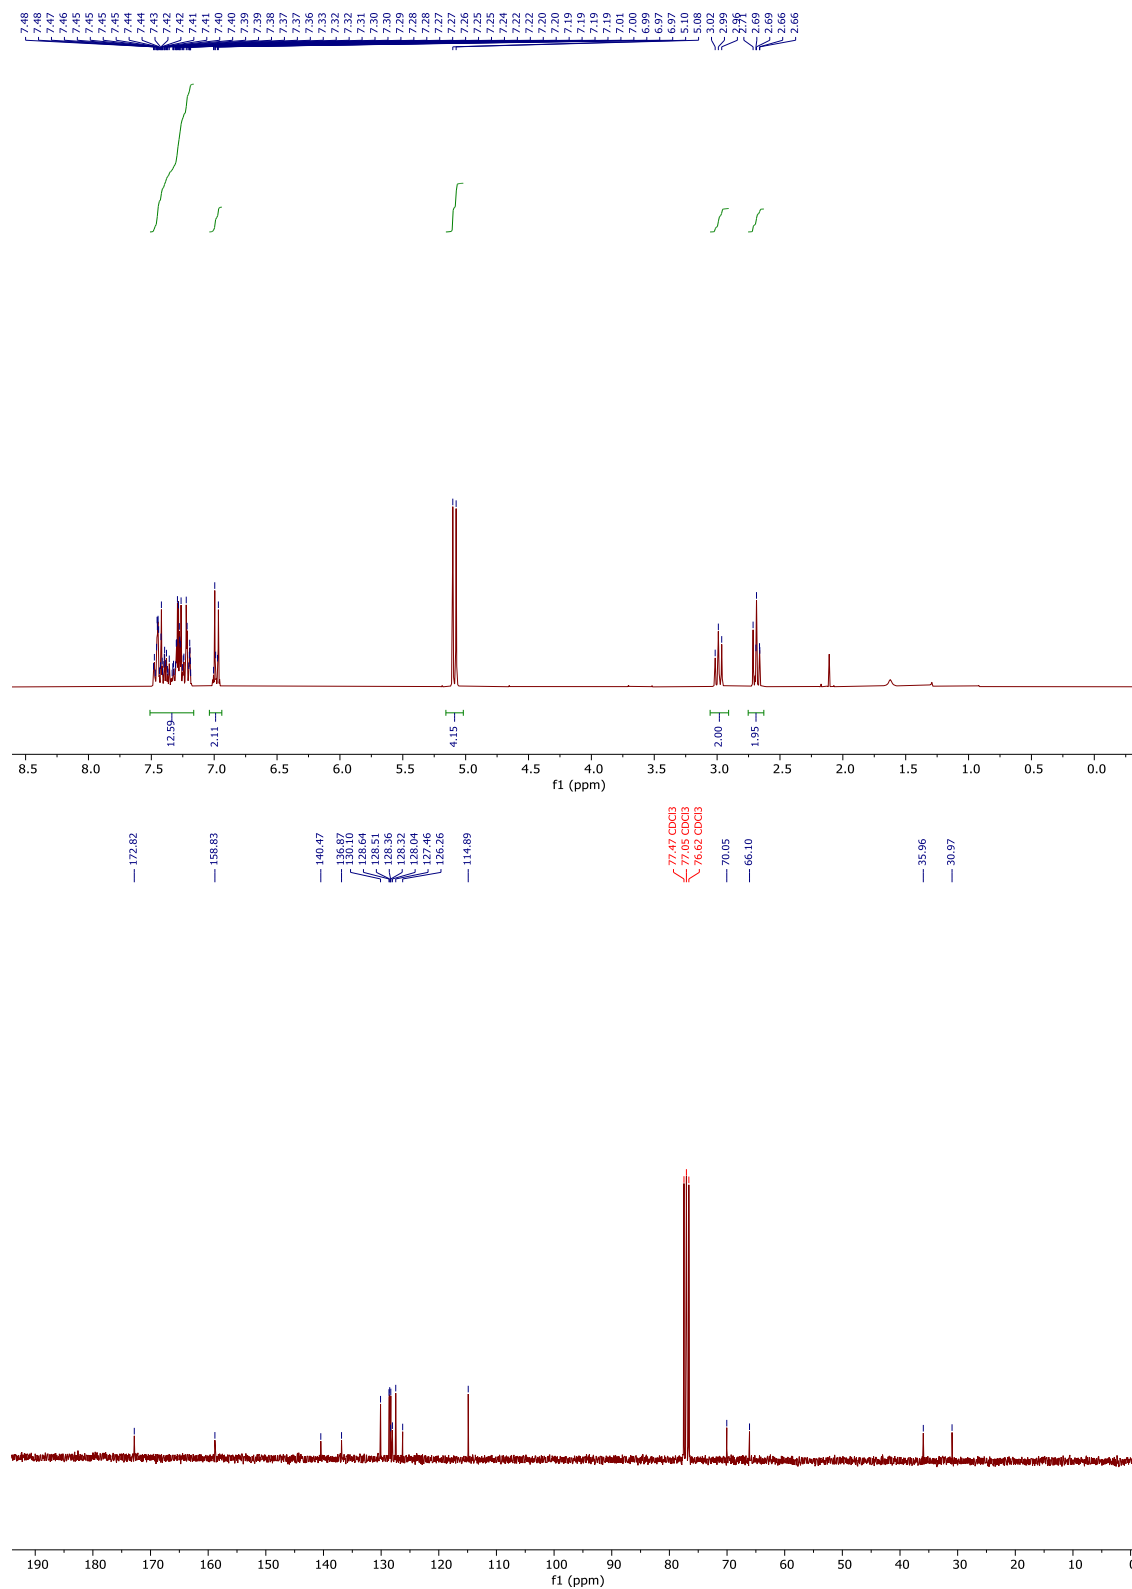

4-((4-(Trifluoromethyl)benzyl)oxy)benzyl 3-phenylpropanoate (**21**)

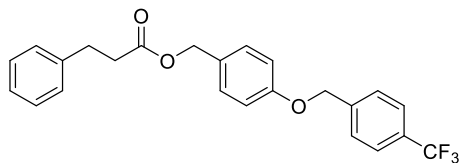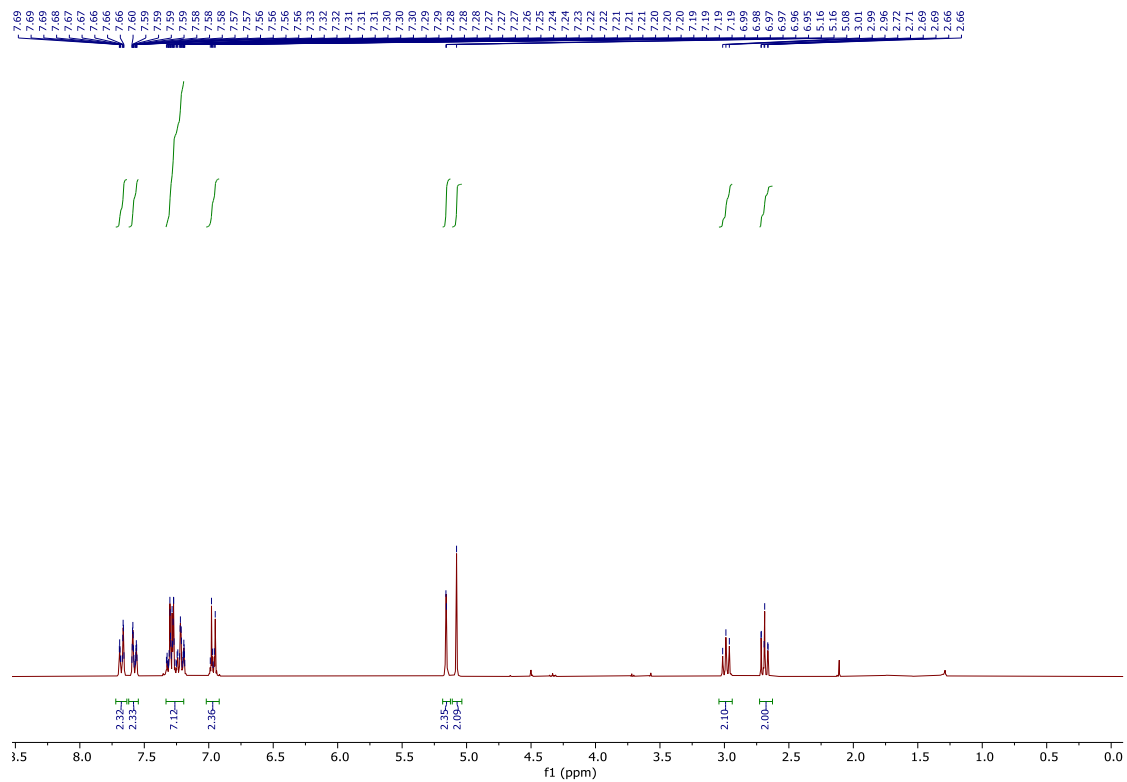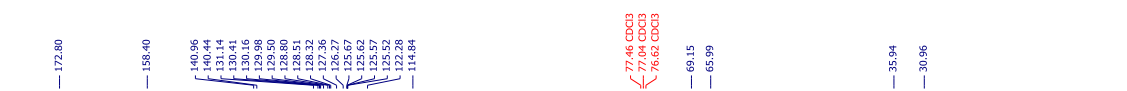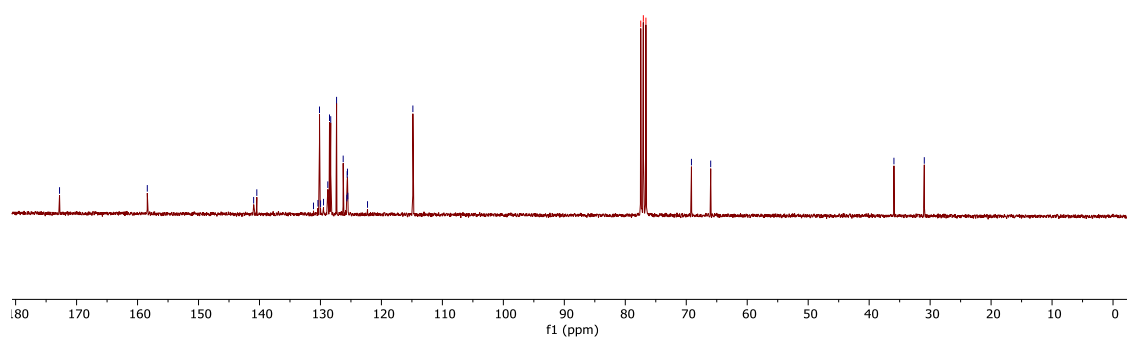

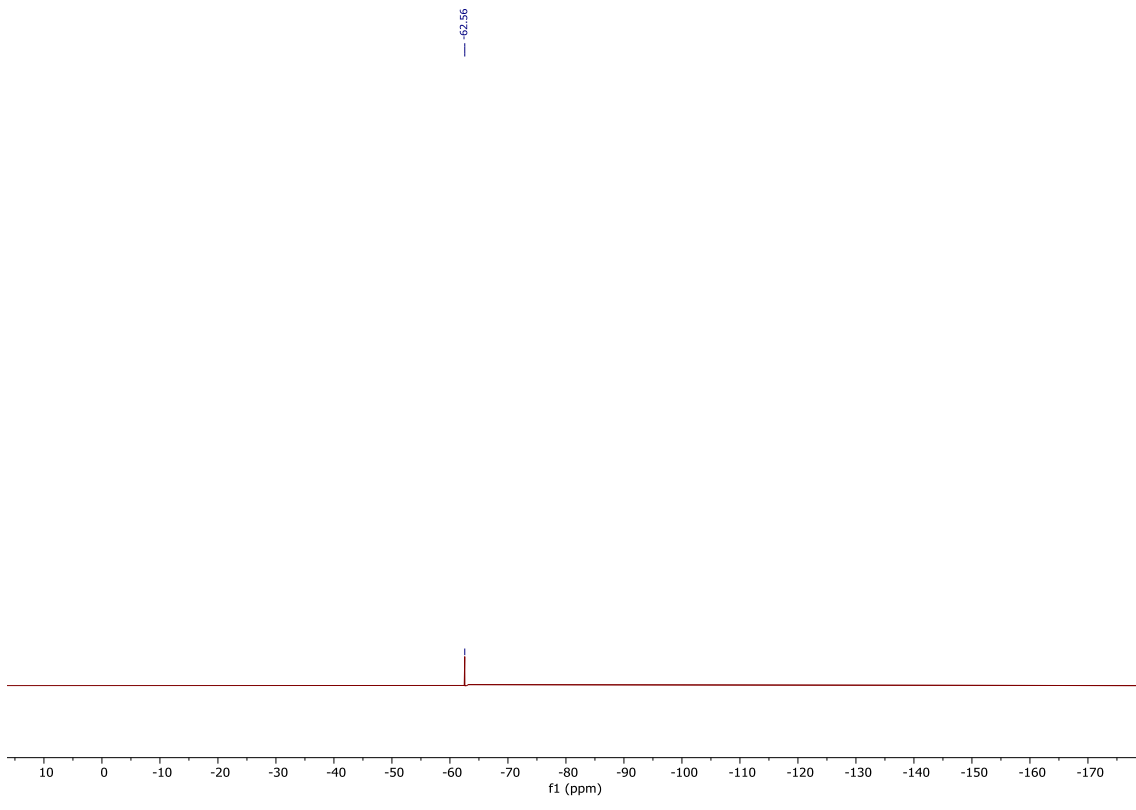



Cyclohexyl 3-phenylpropanoate (22)

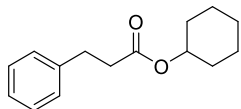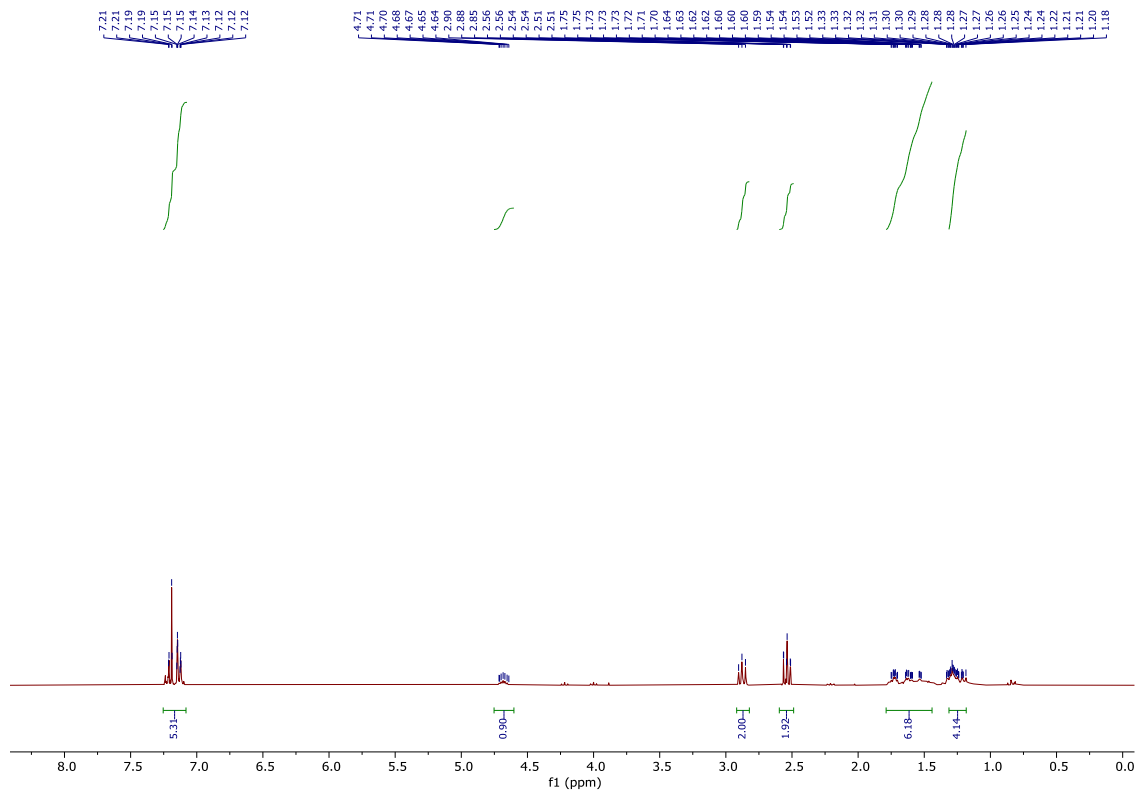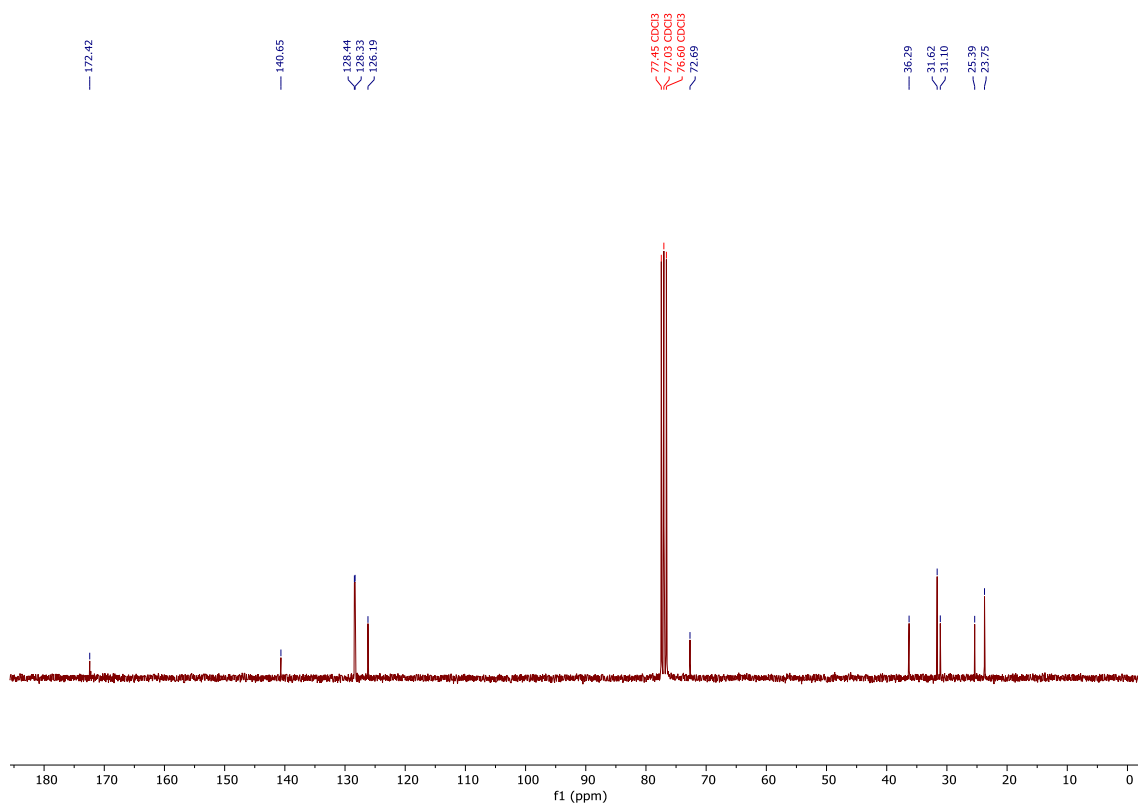

1-Cyclohexylethyl 3-phenylpropanoate (**23**)

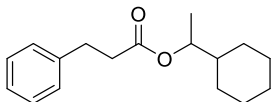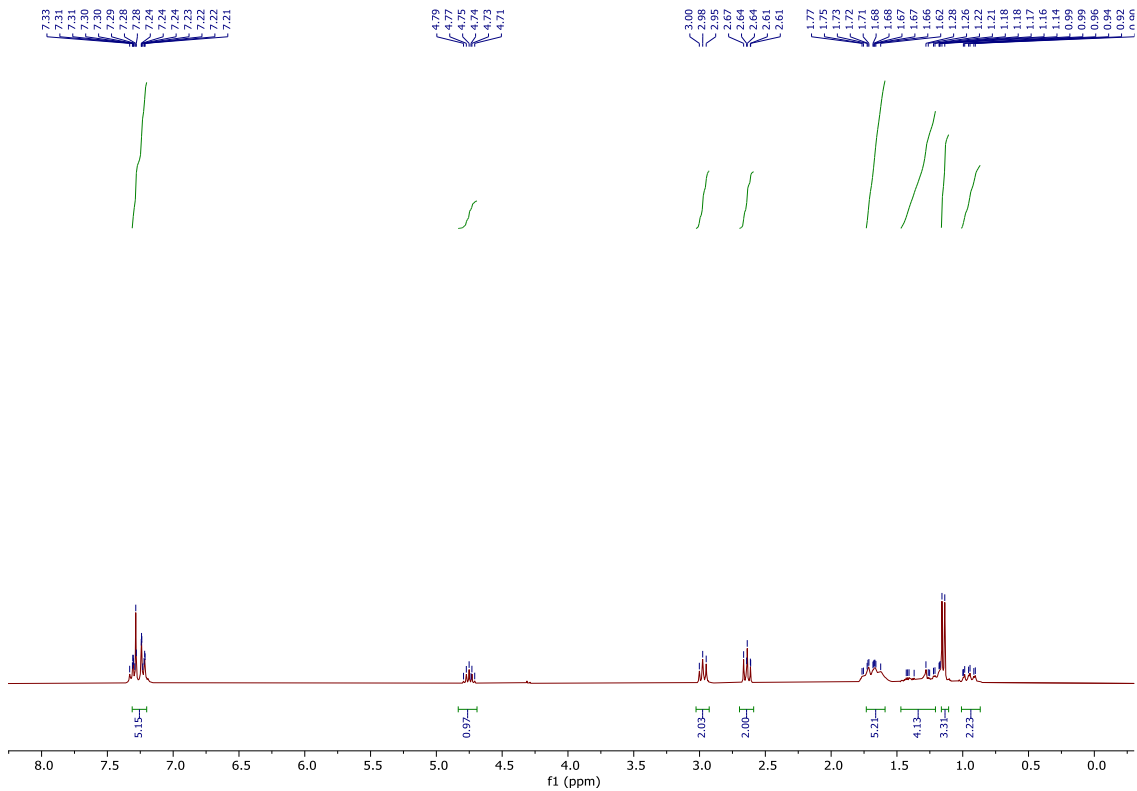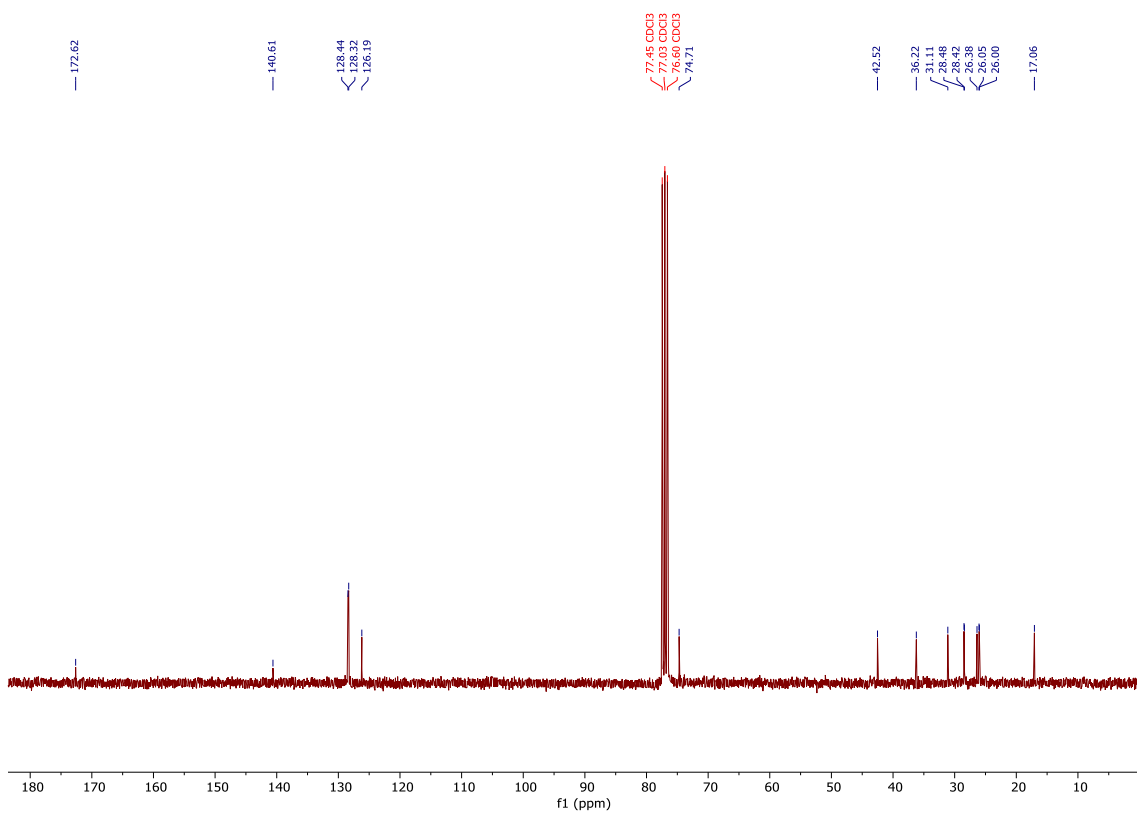

Hex-5-en-1-yl 3-phenylpropanoate (24)

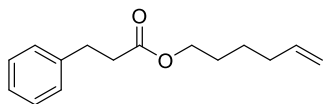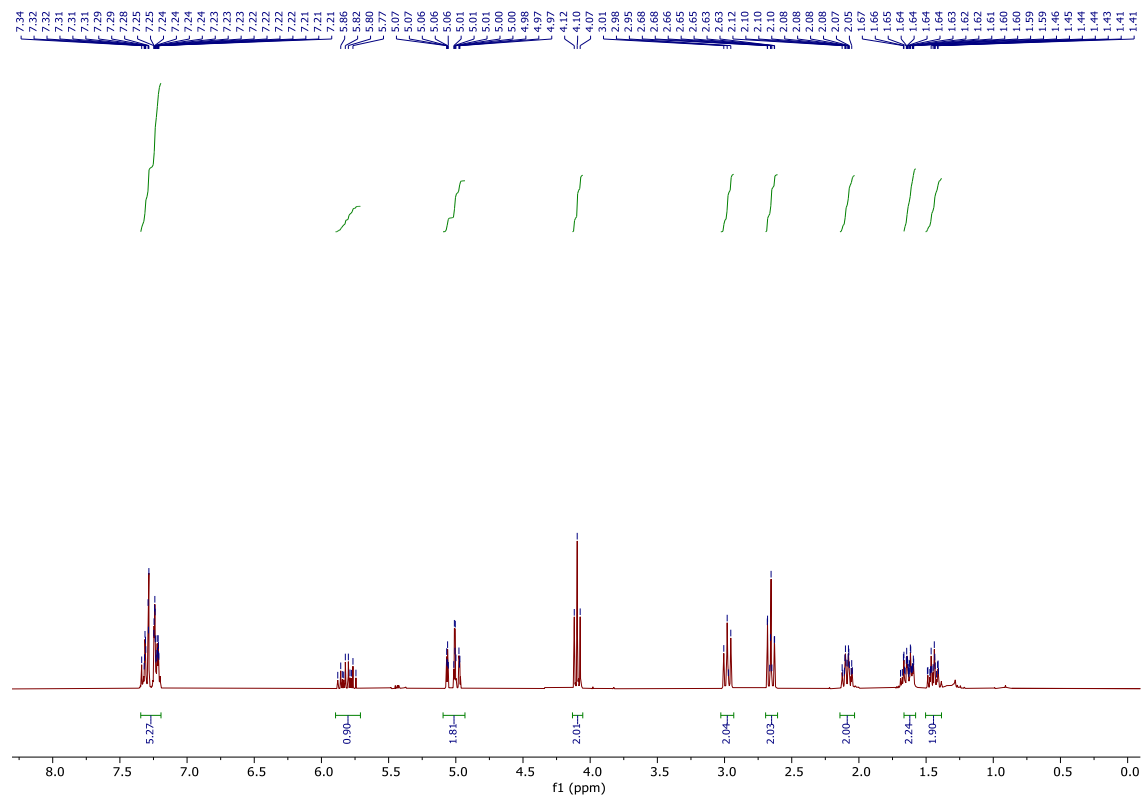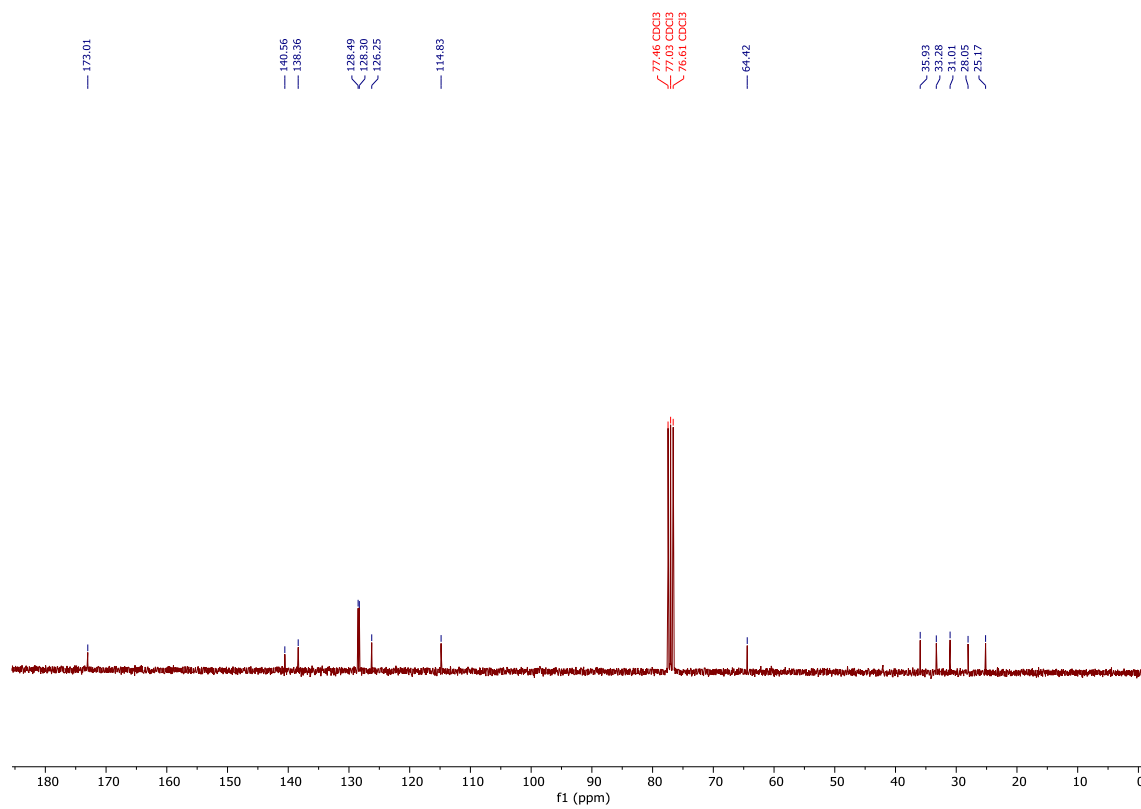

(E)-Hex-3-en-1-yl 3-phenylpropanoate (25)

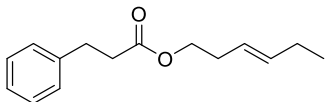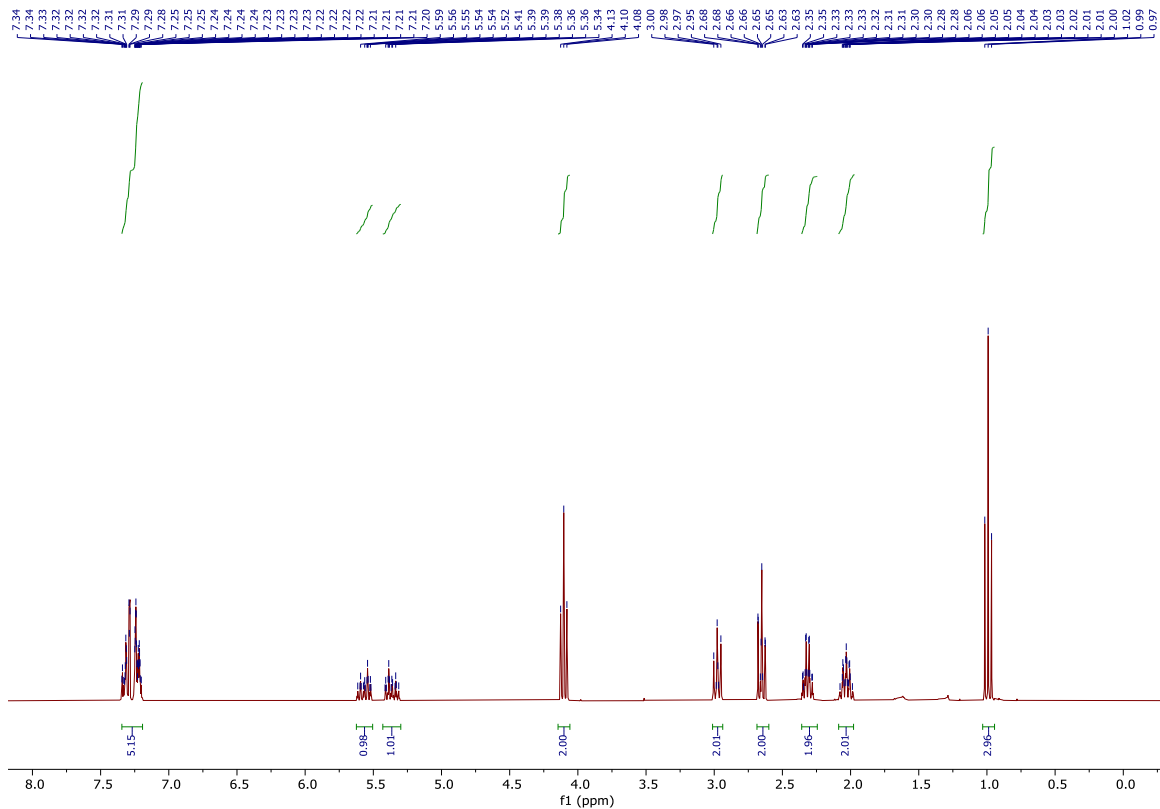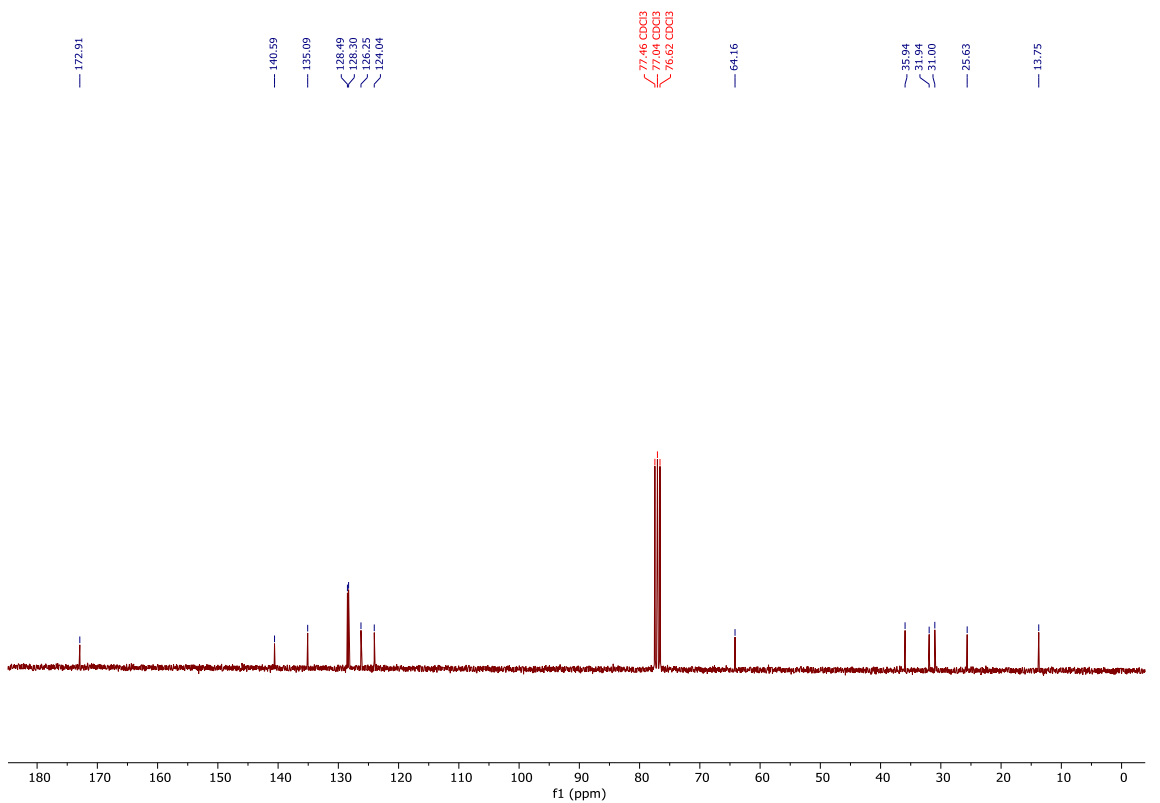

Cyclohex-3-en-1-ylmethyl 3-phenylpropanoate (26)

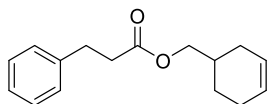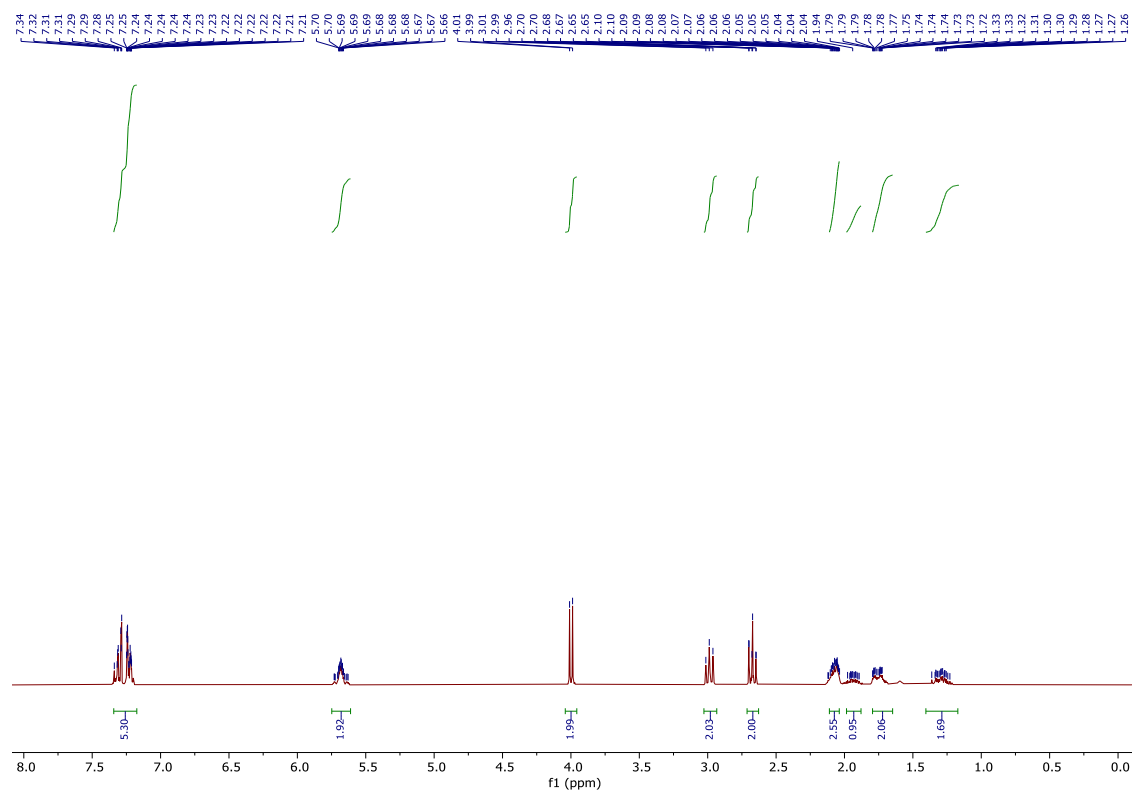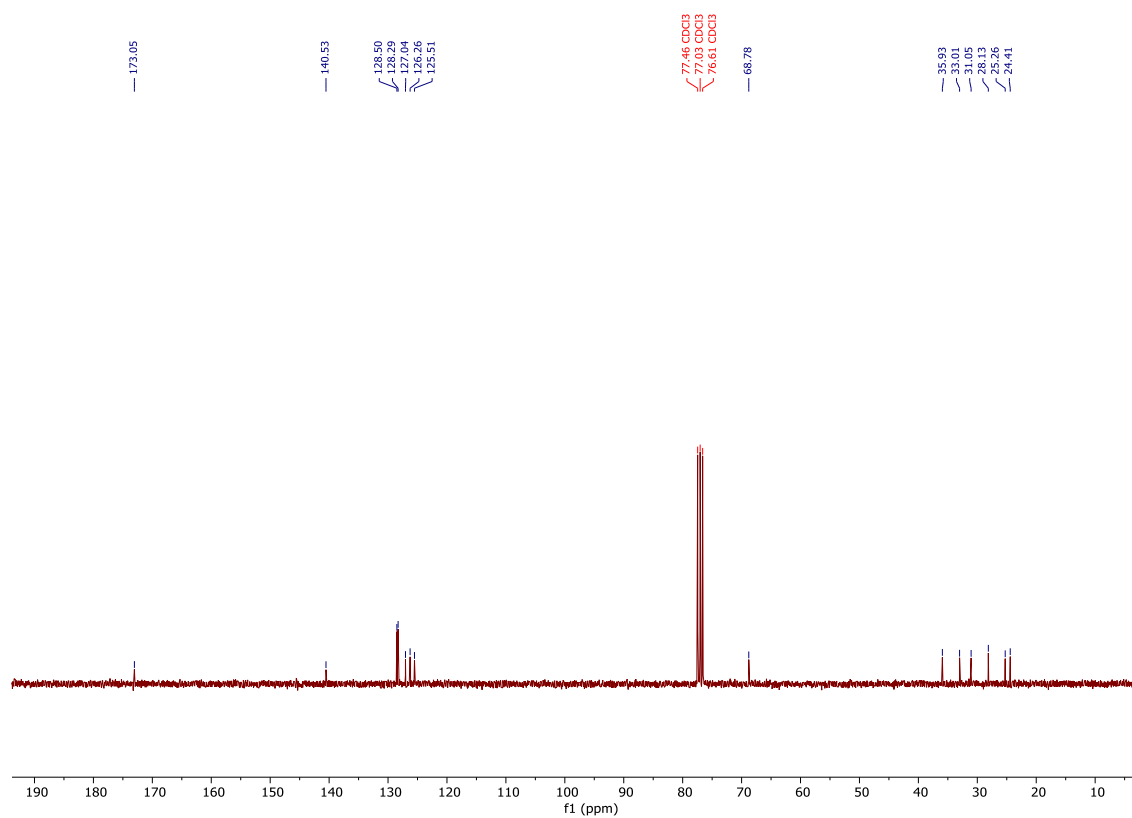

Cinnamyl 3-phenylpropanoate (**27**)

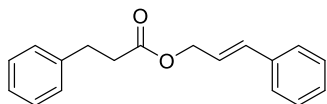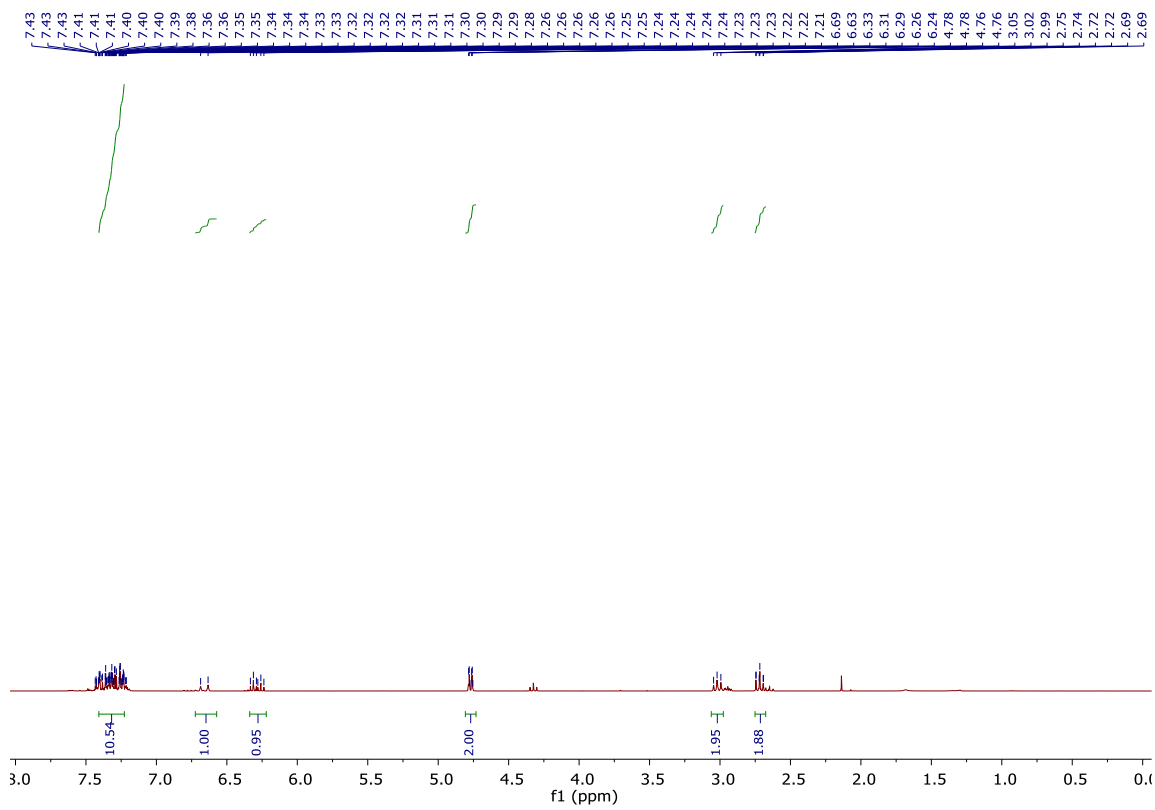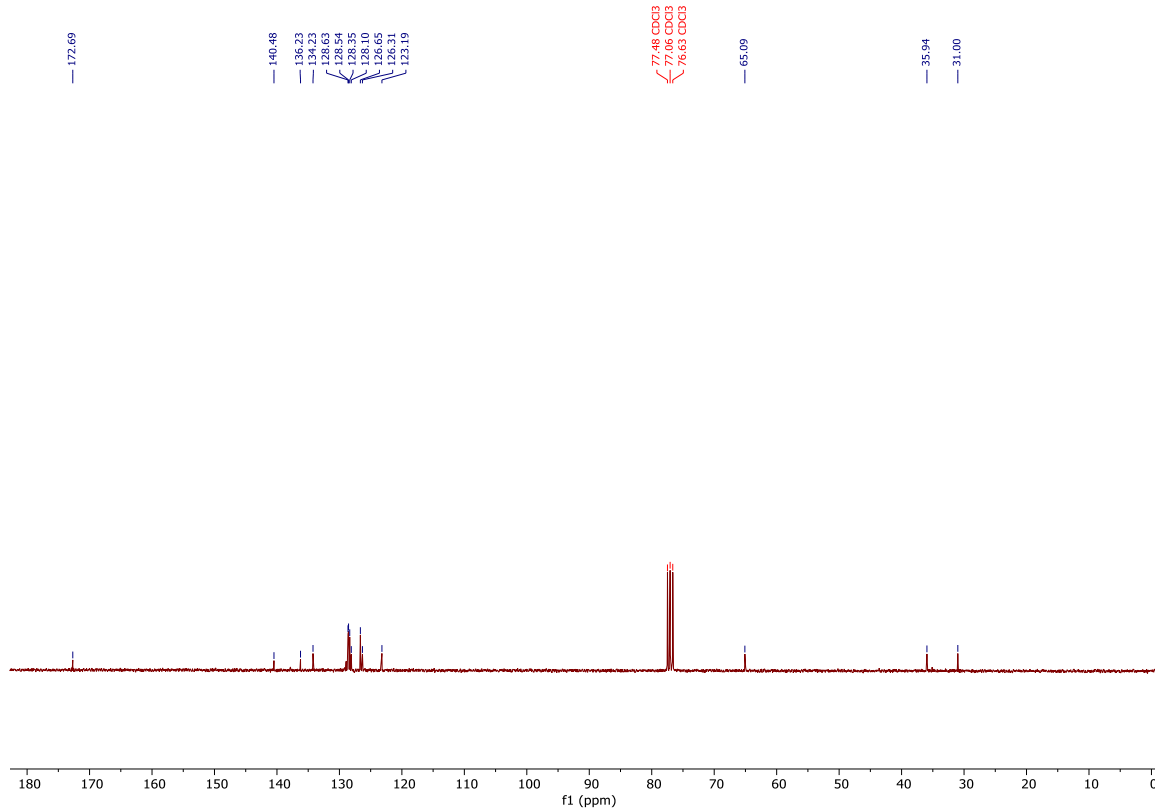

Butyl propionate (28)

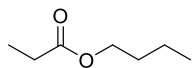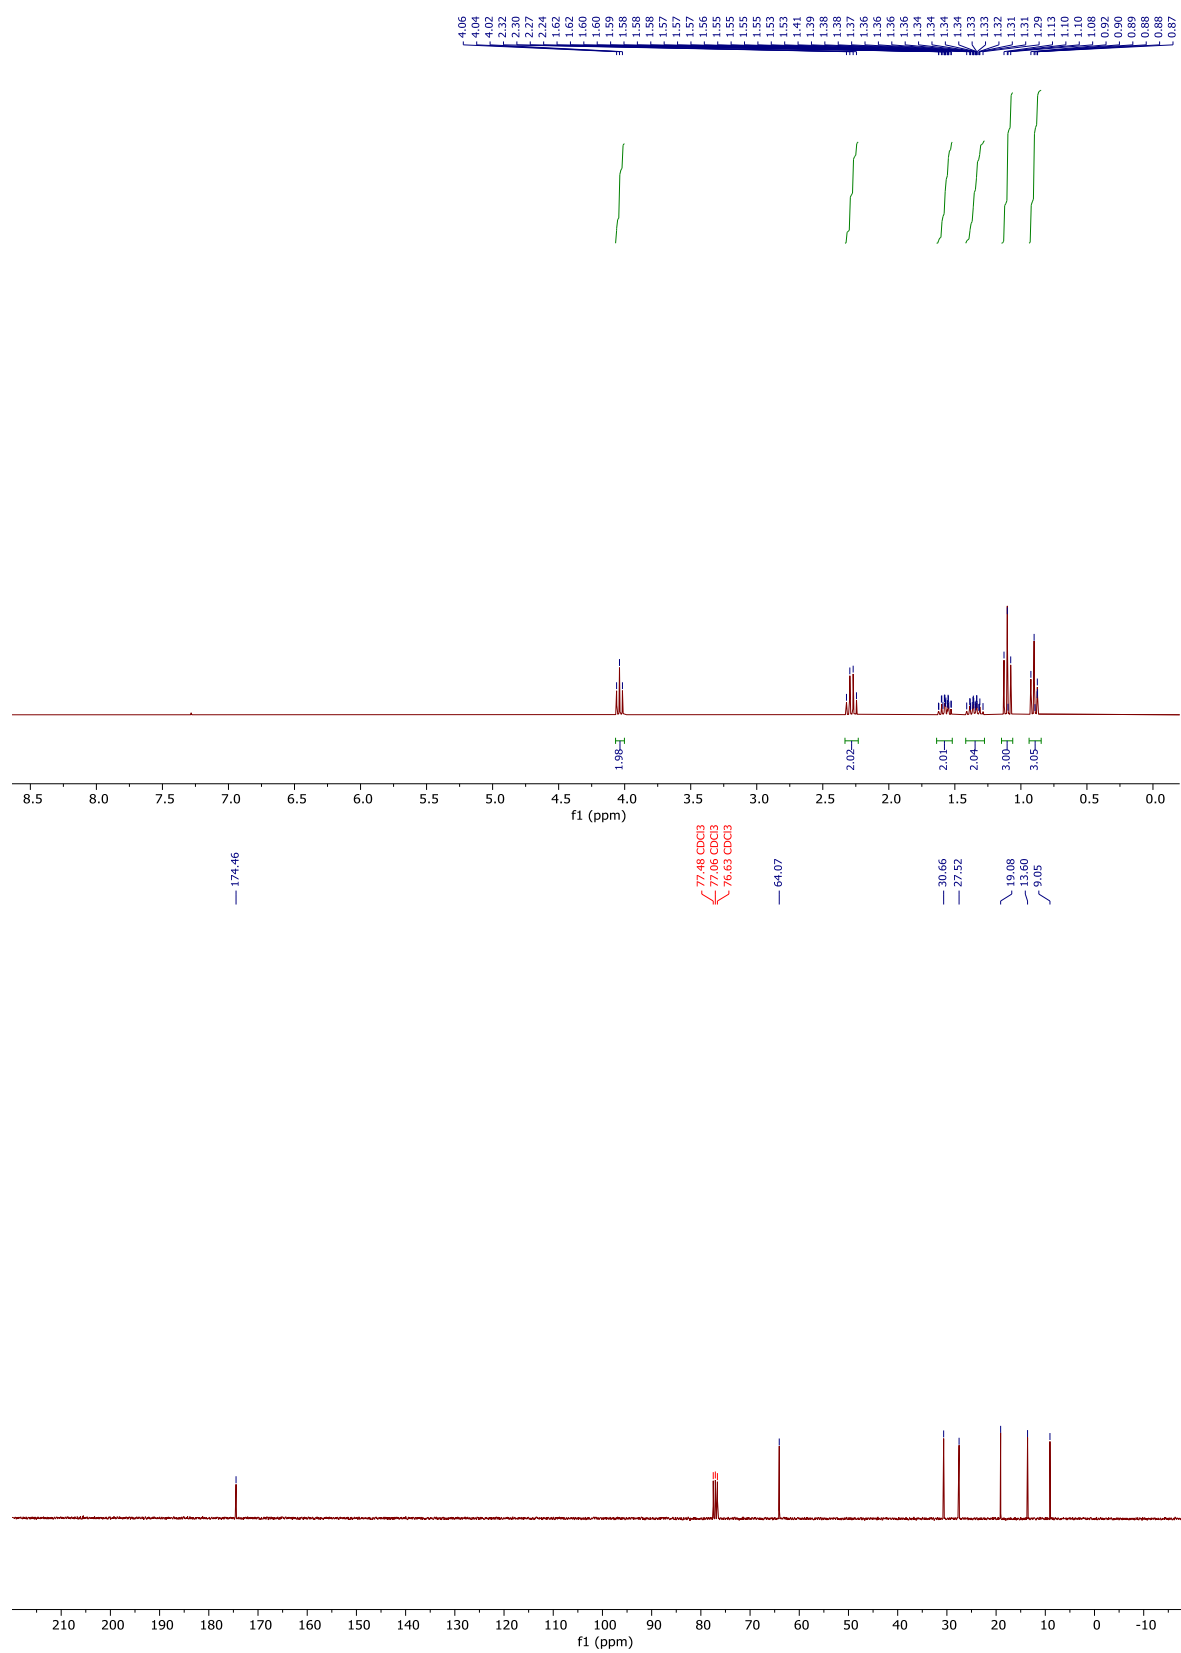

Butyl butyrate (29)

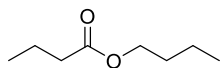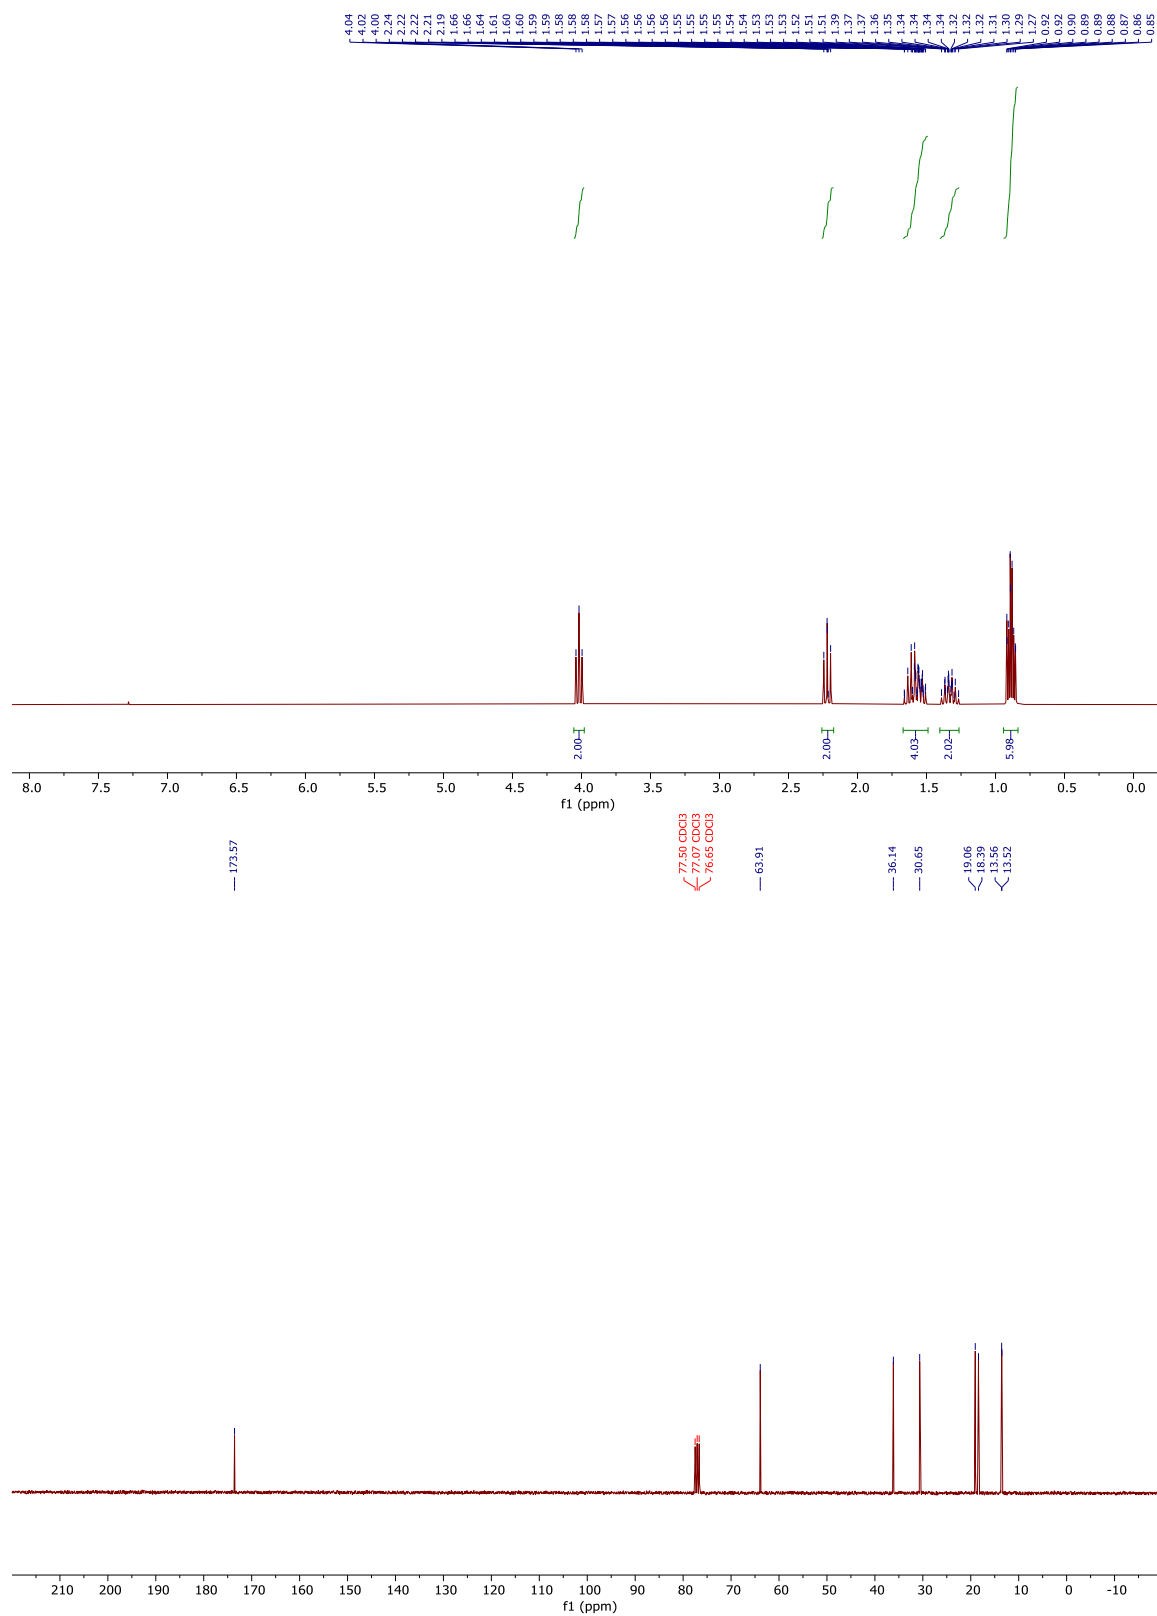



Butyl hexanoate (30)

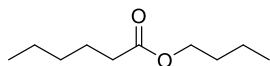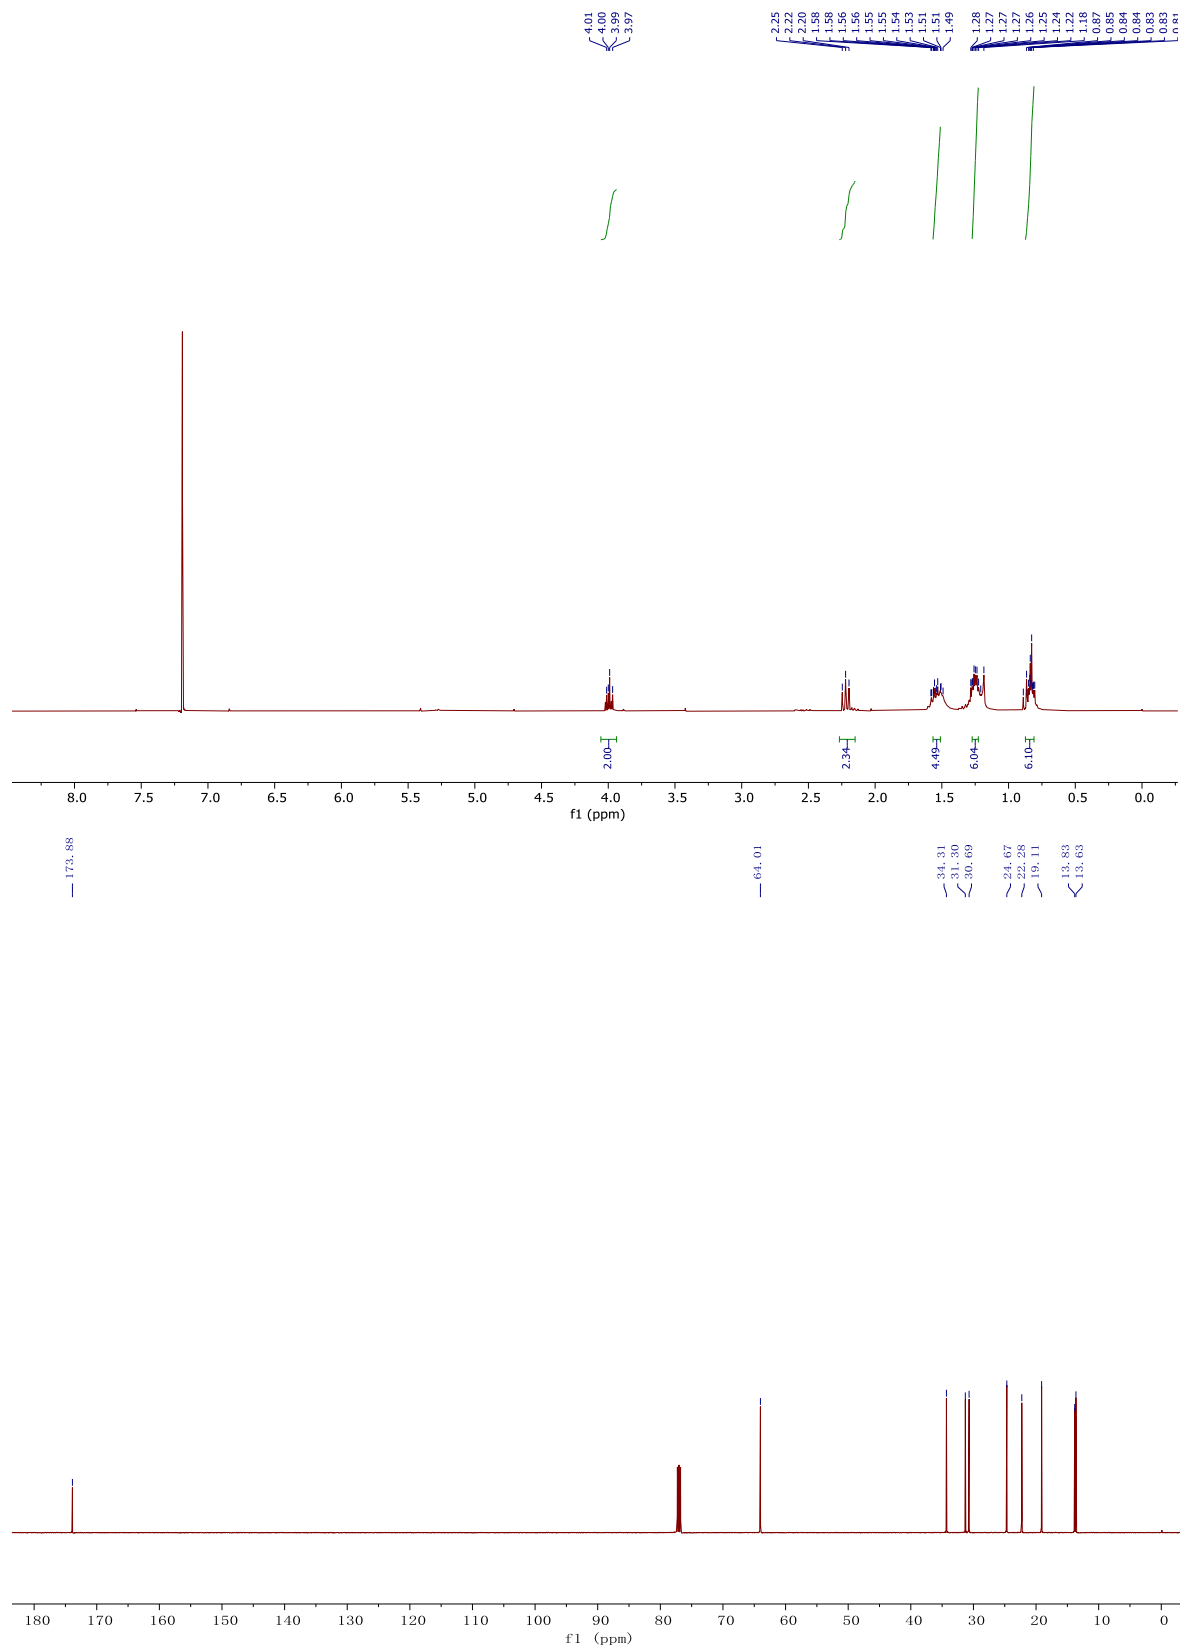

Butyl nonanoate (31)

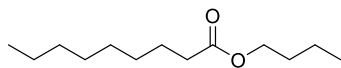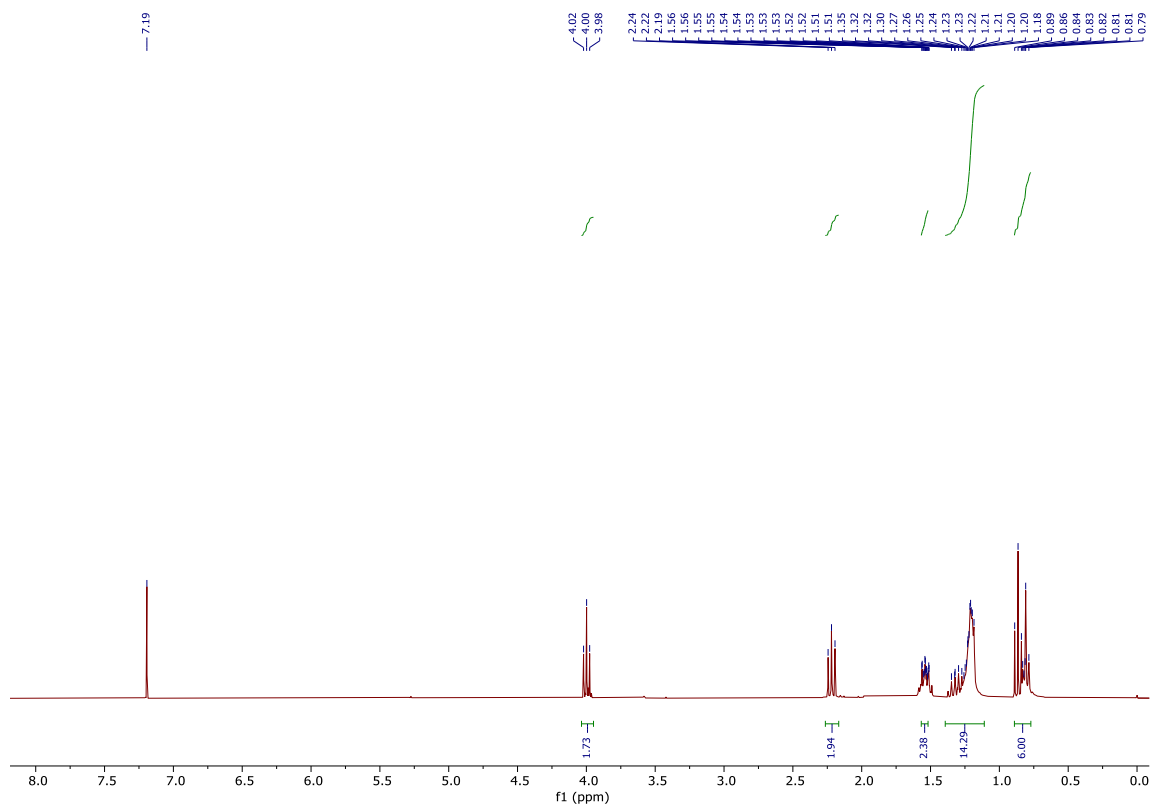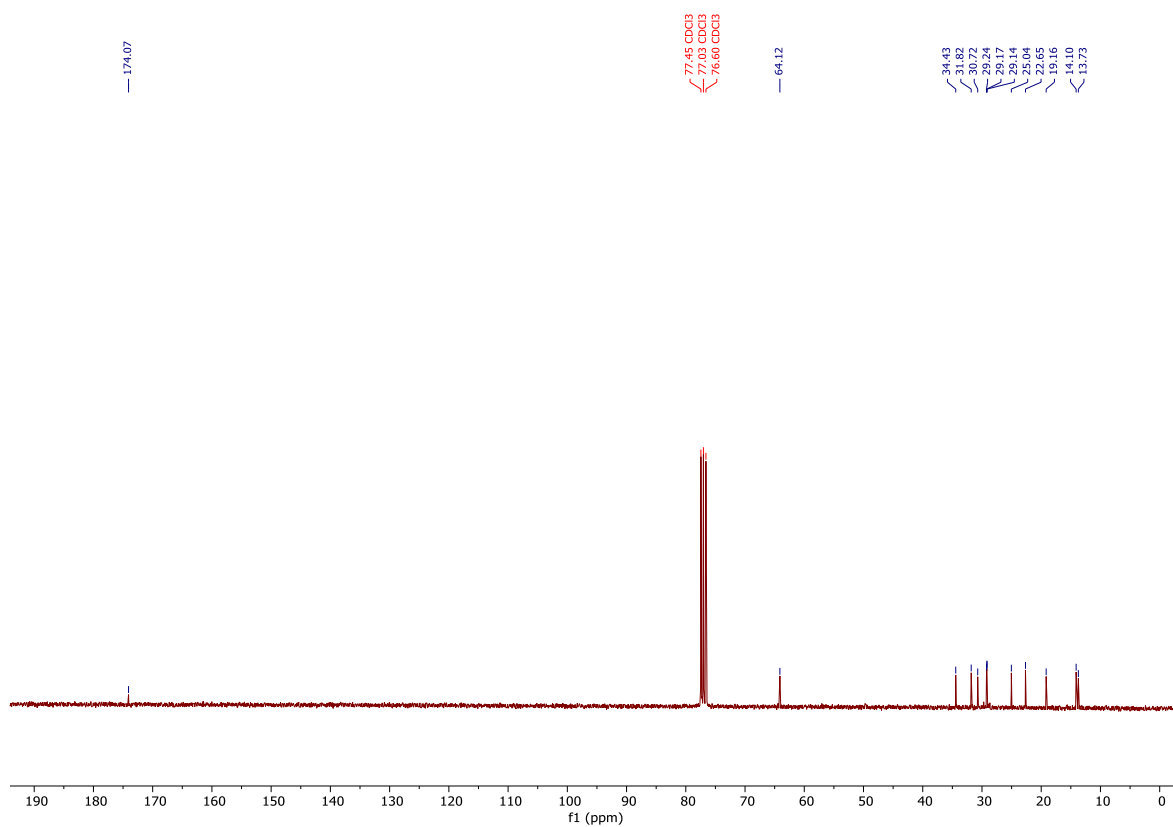

Butyl tetradecanoate (32)

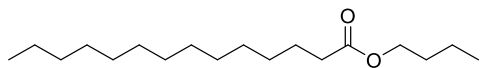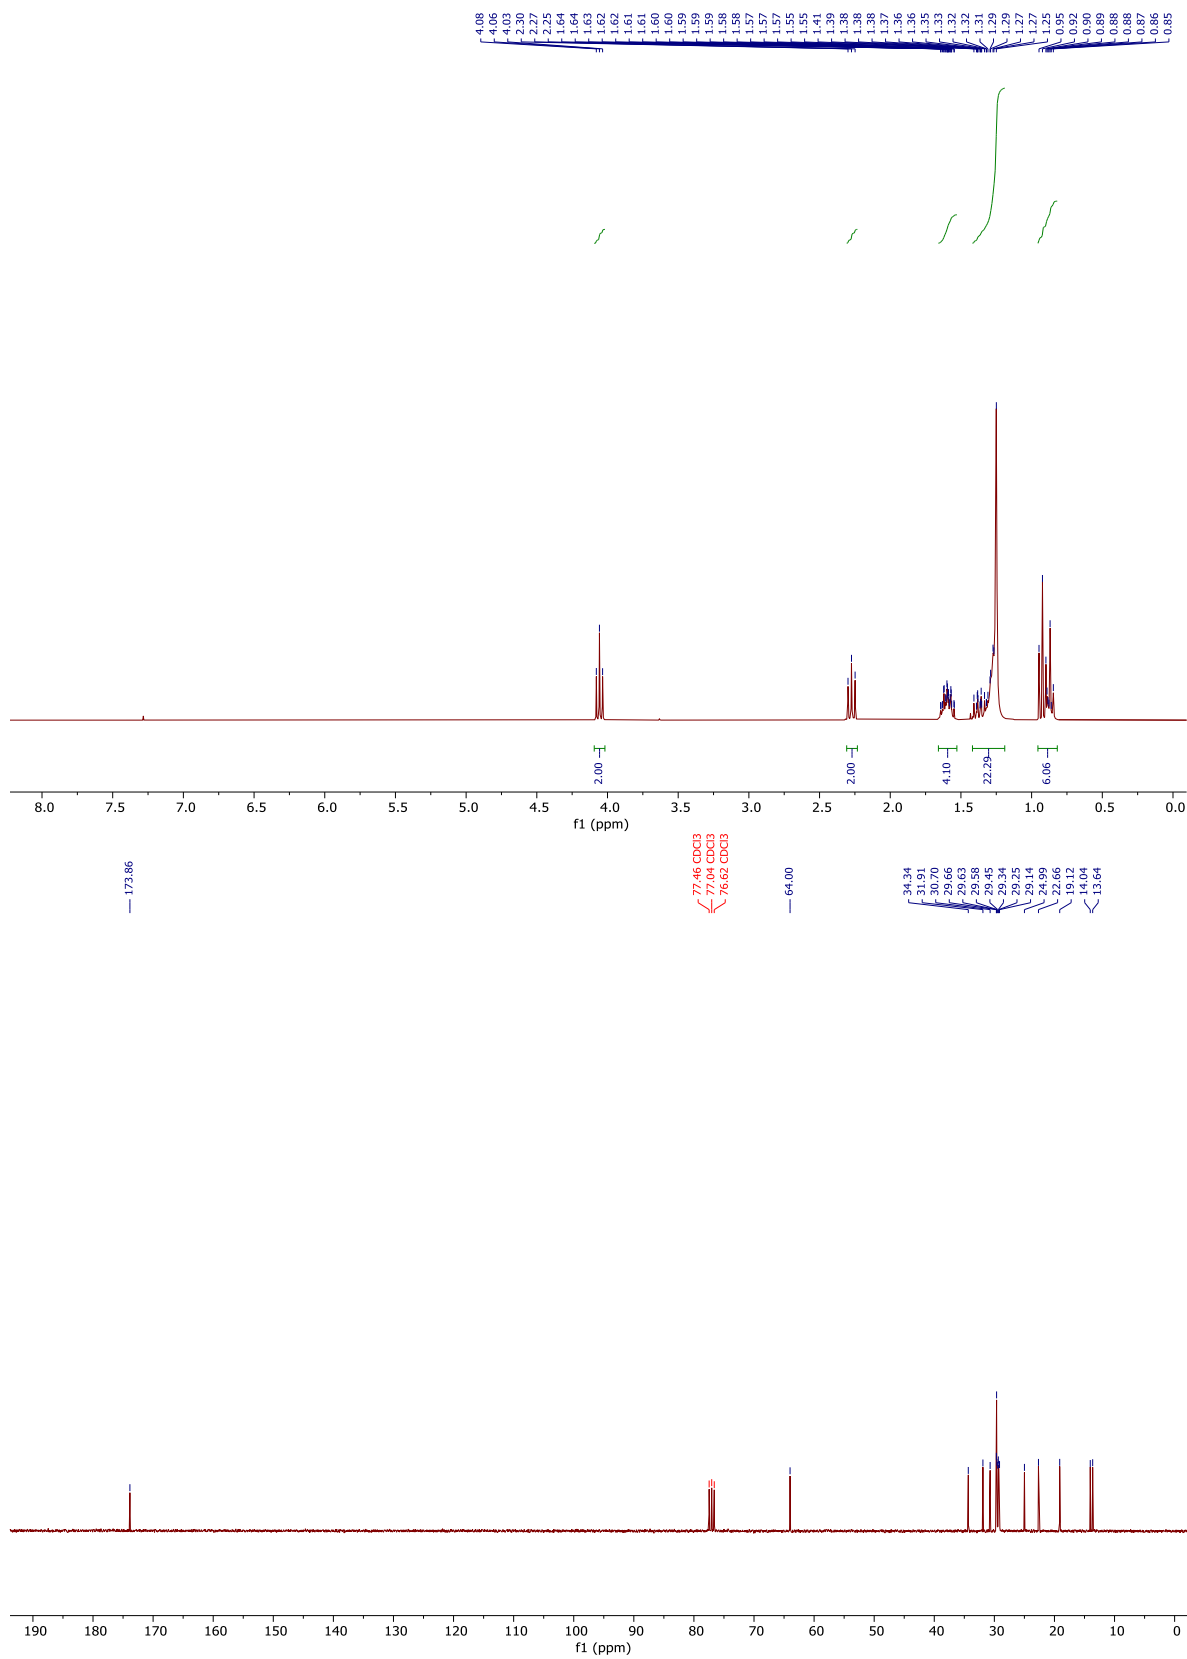

Phenyl 3-phenylpropanoate (33)

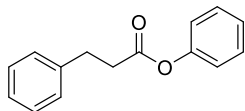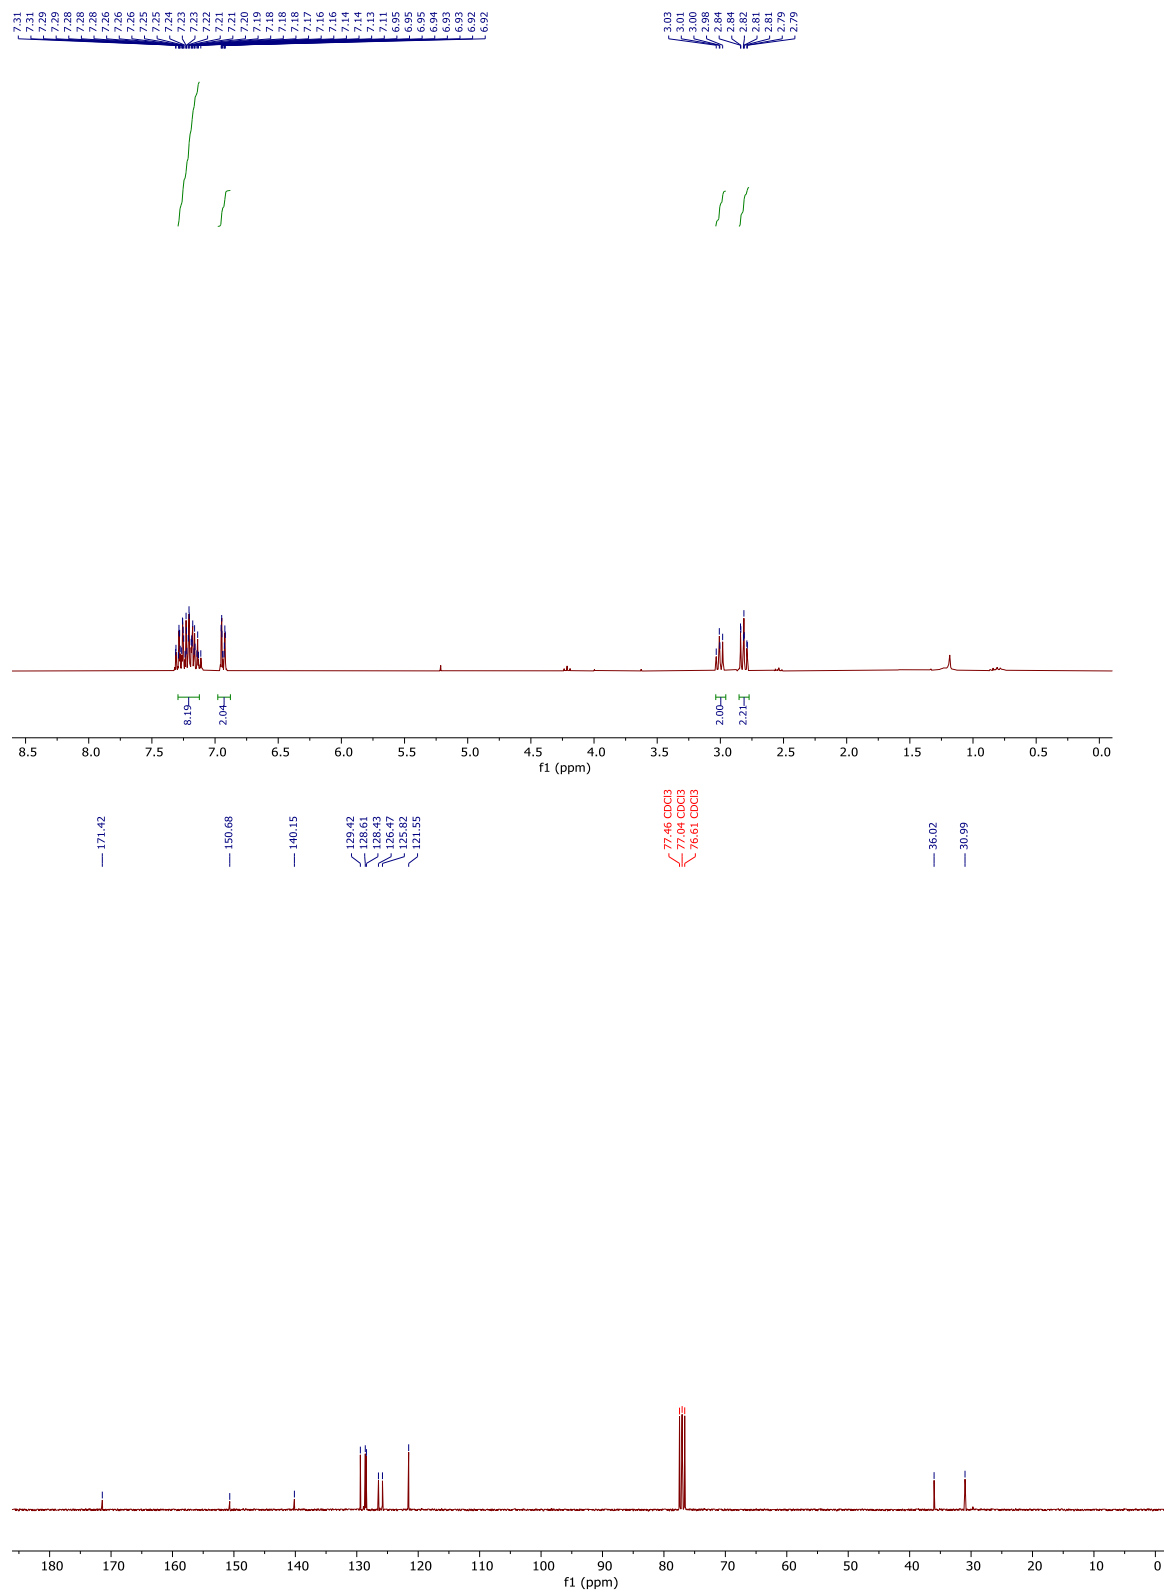

Naphthalen-2-yl 3-phenylpropanoate (34)

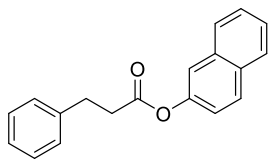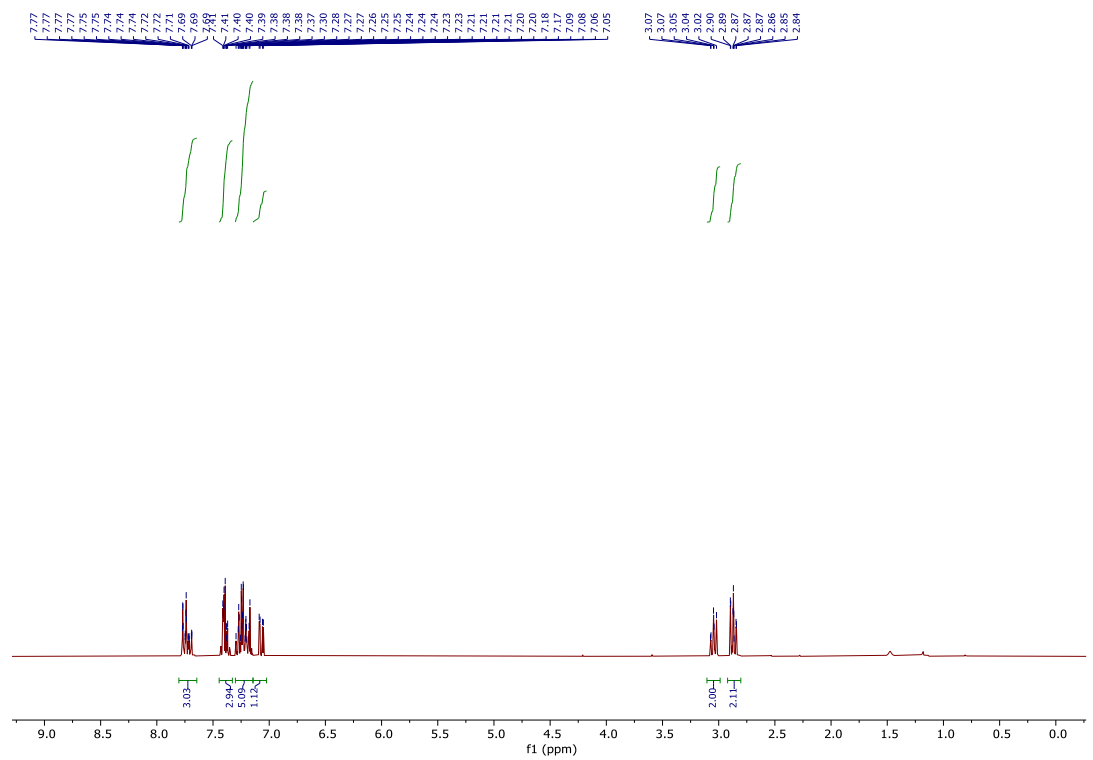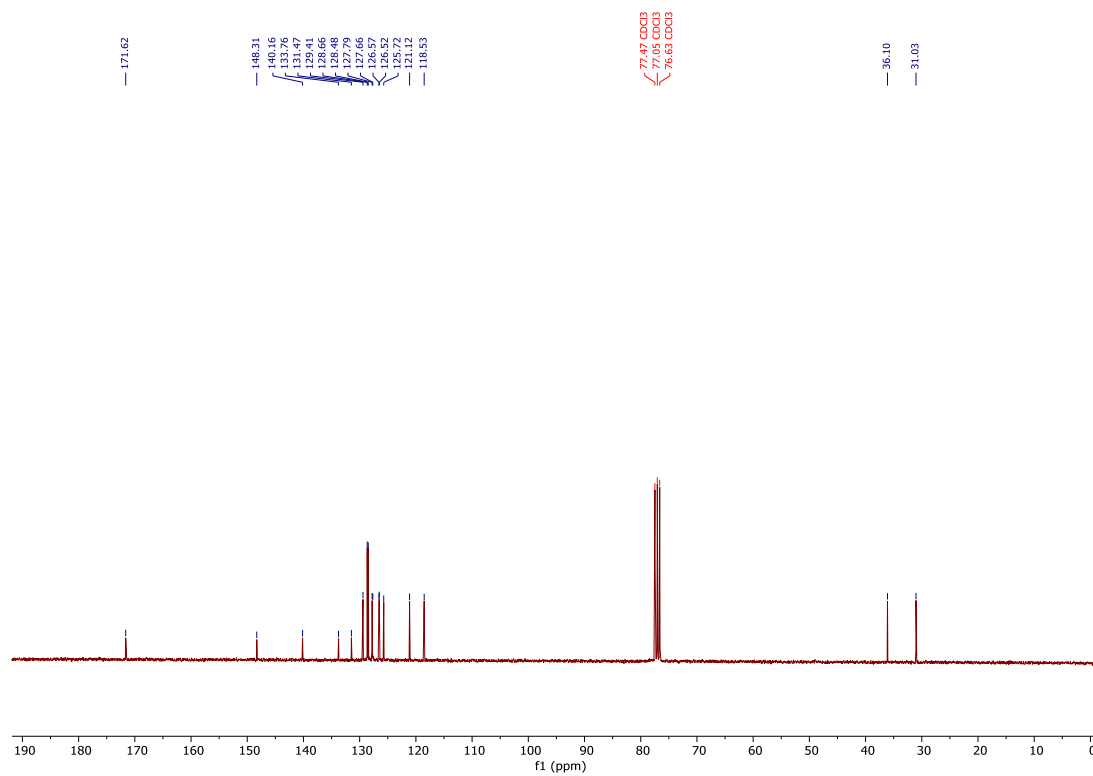

Naphthalen-1-yl 3-phenylpropanoate (35)

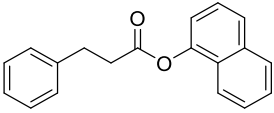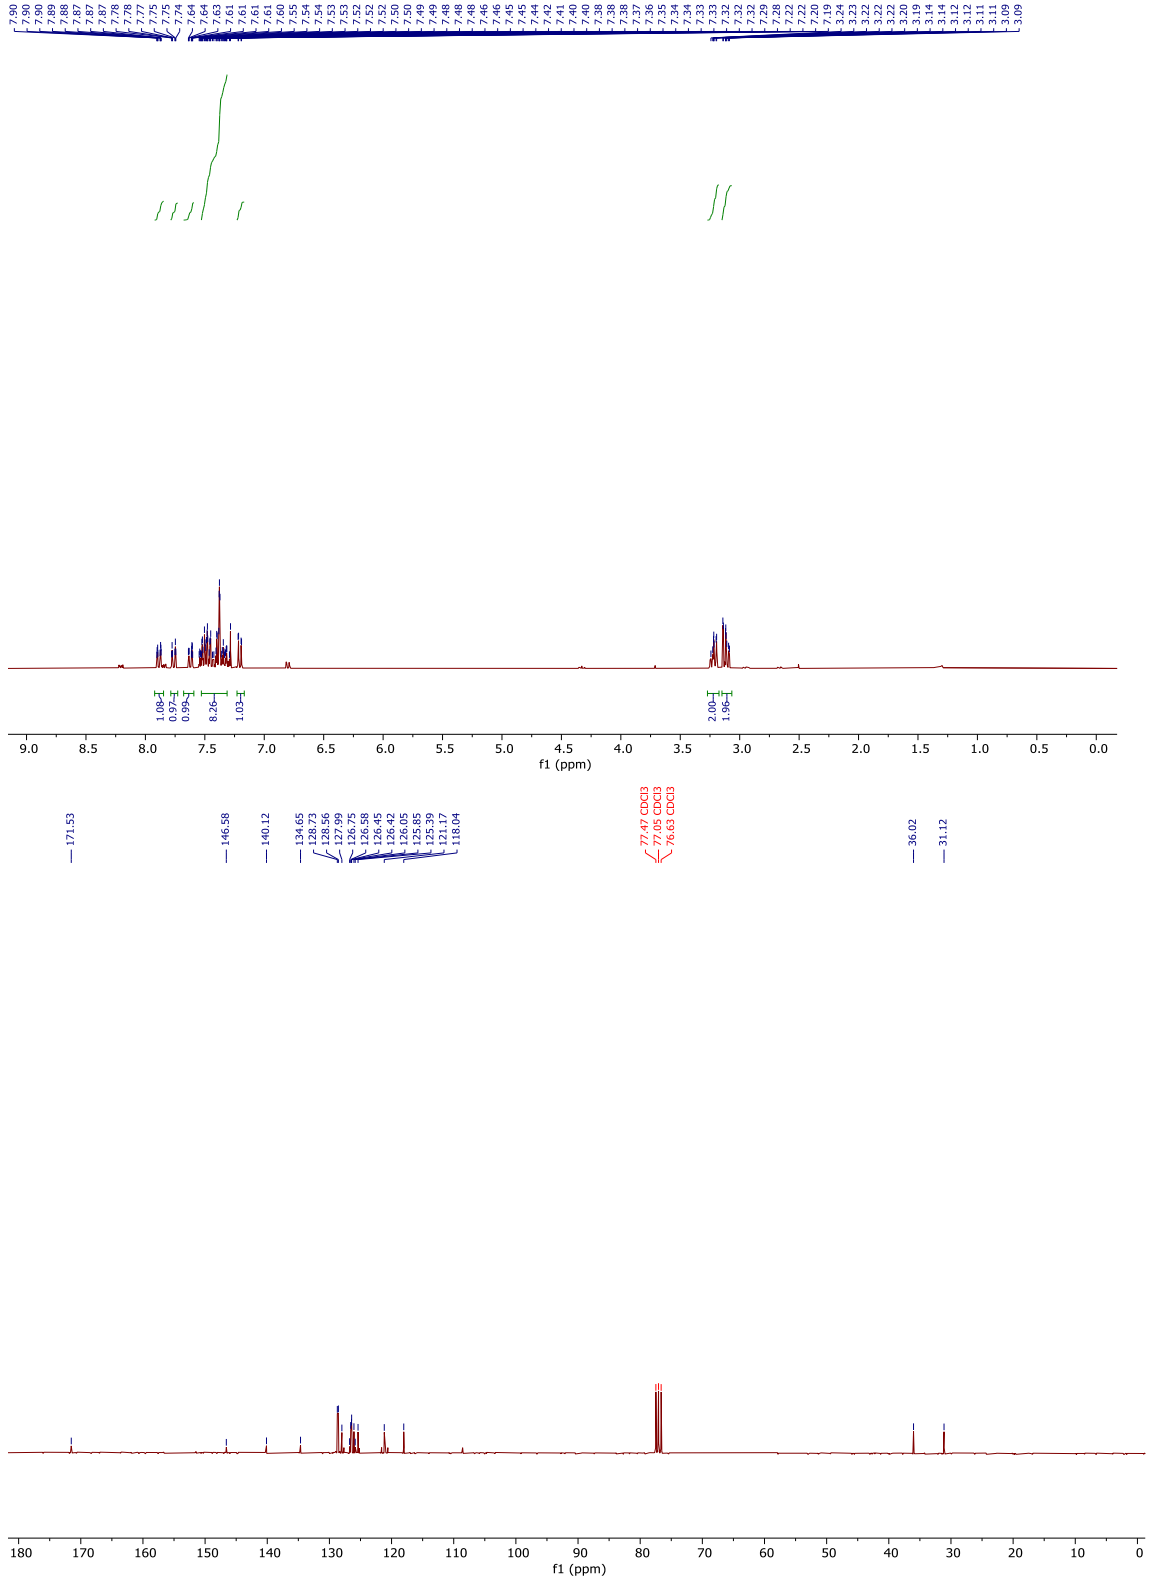

[1,1'-Biphenyl]-4-yl 3-phenylpropanoate (36)

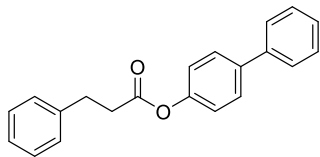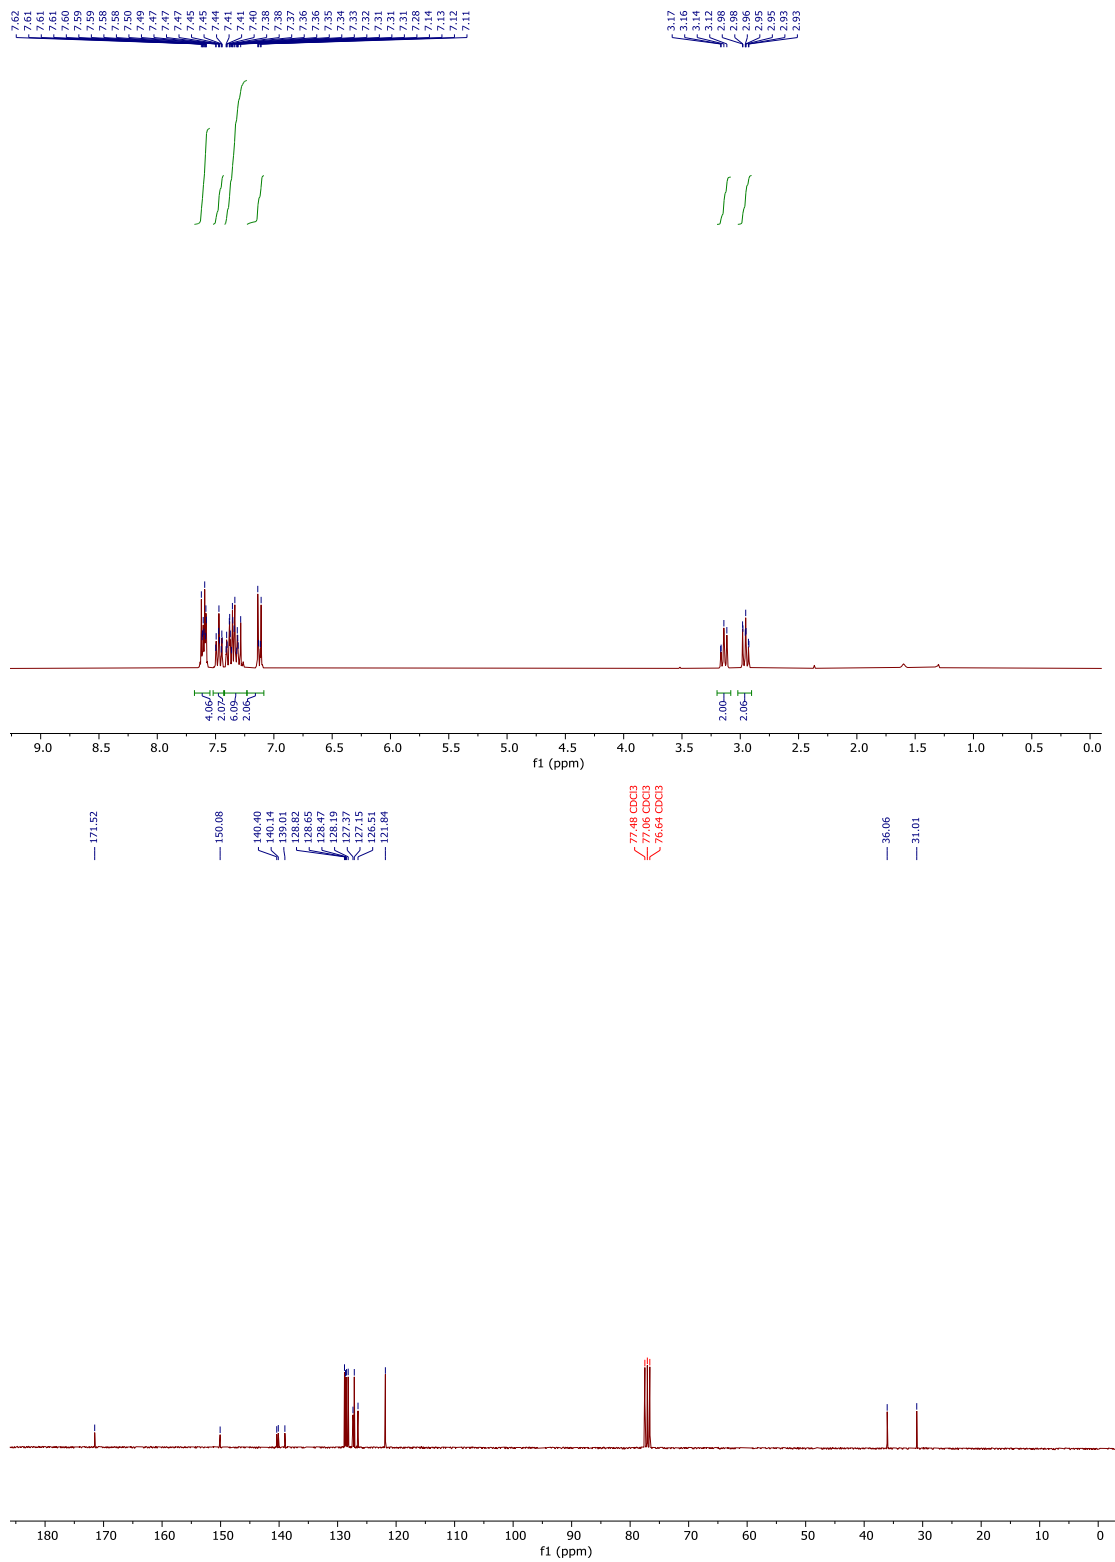

[1,1'-Biphenyl]-2-yl 3-phenylpropanoate (37)

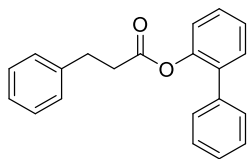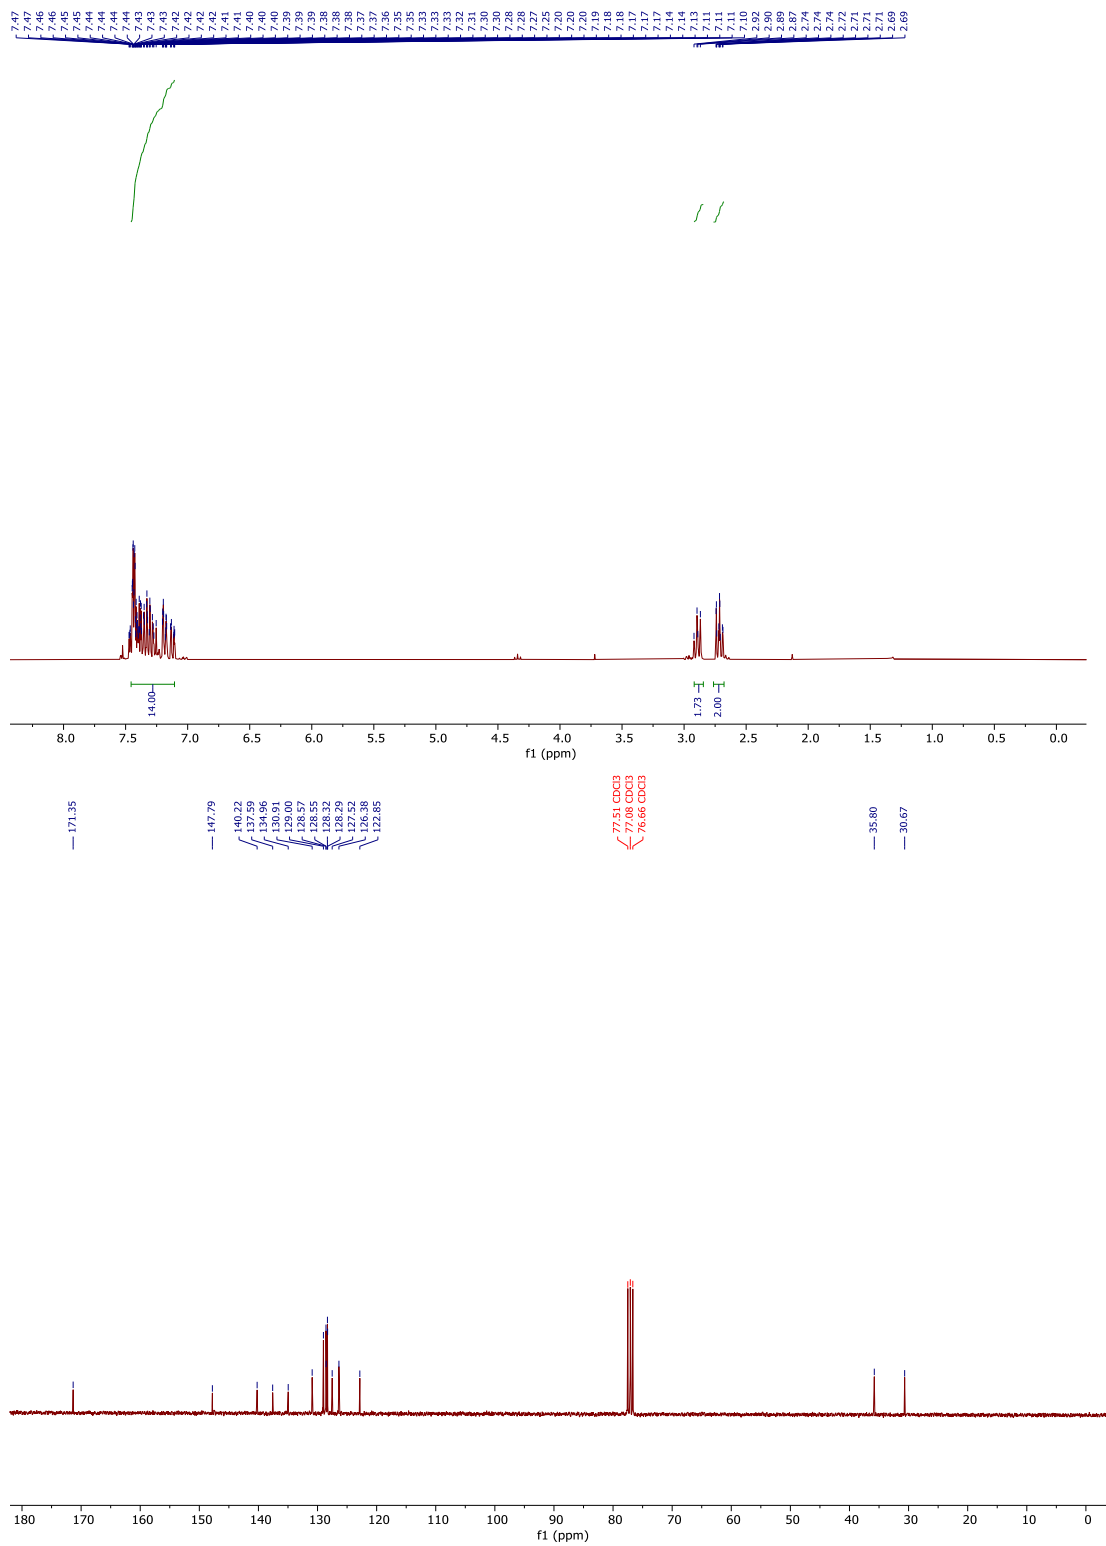



4-(2-Phenylpropan-2-yl)phenyl 3-phenylpropanoate (**38**)

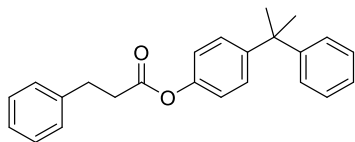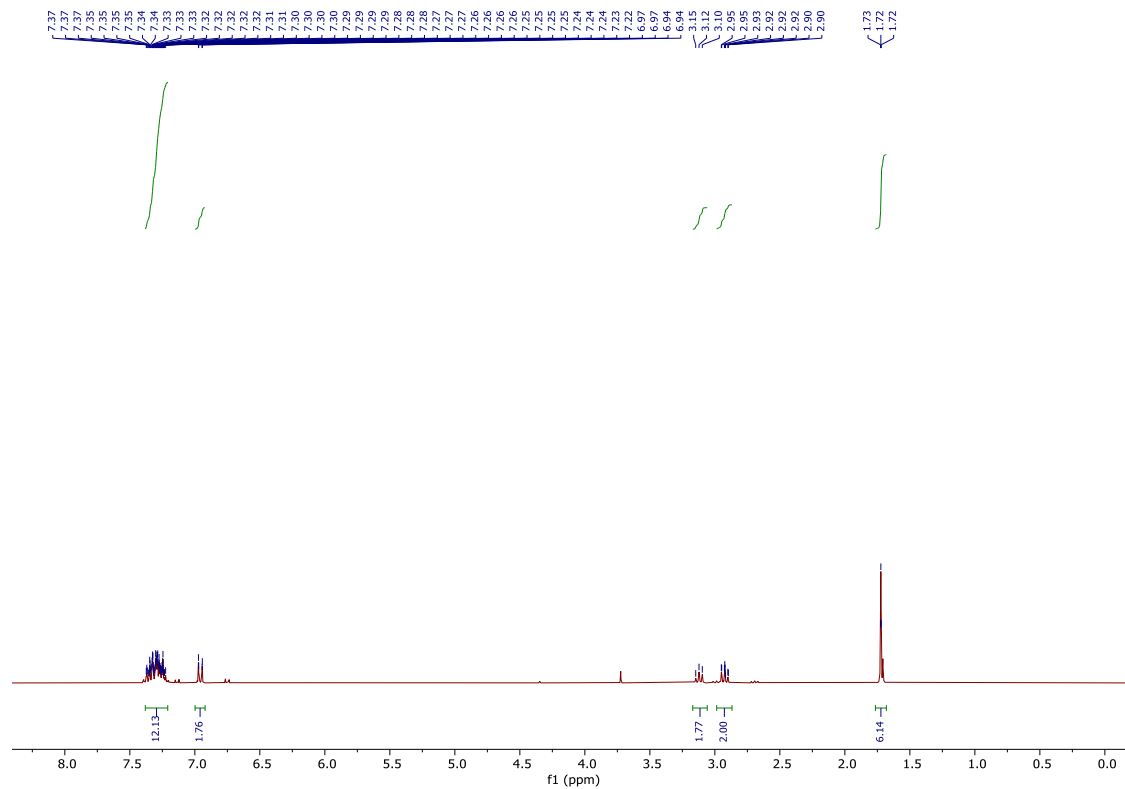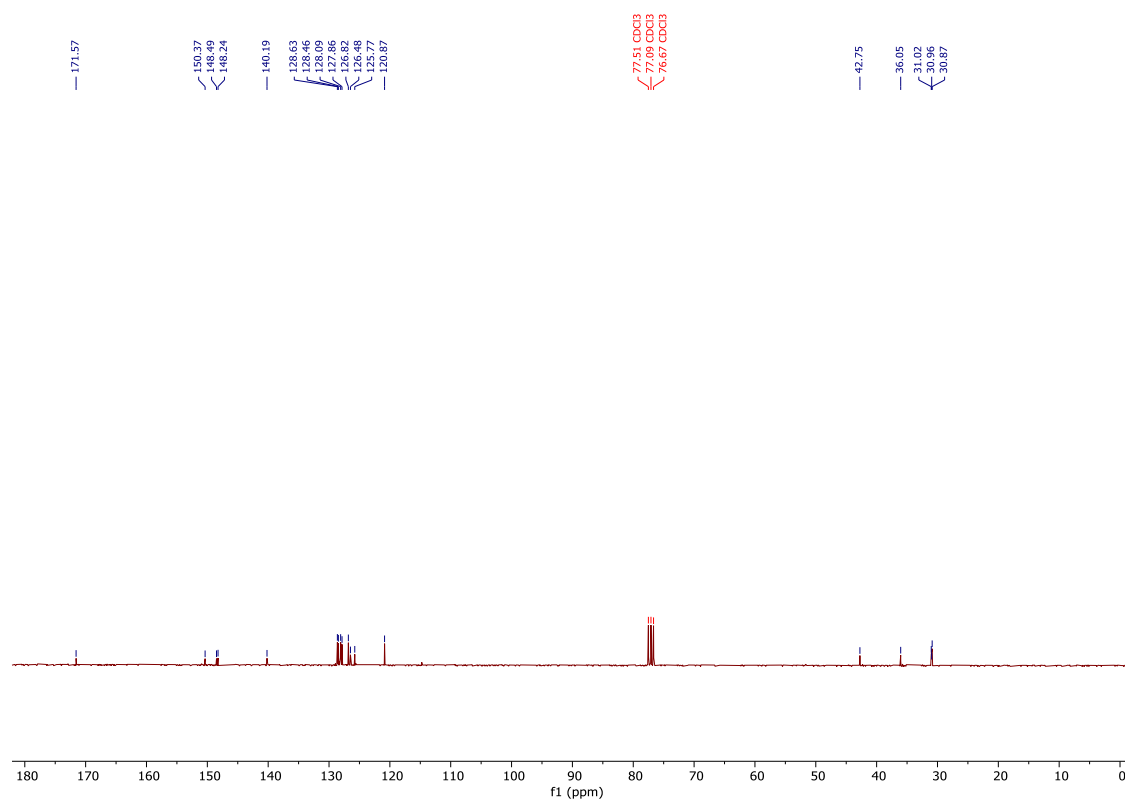

9H-Carbazol-2-yl 3-phenylpropanoate (39)

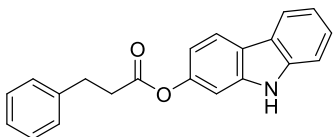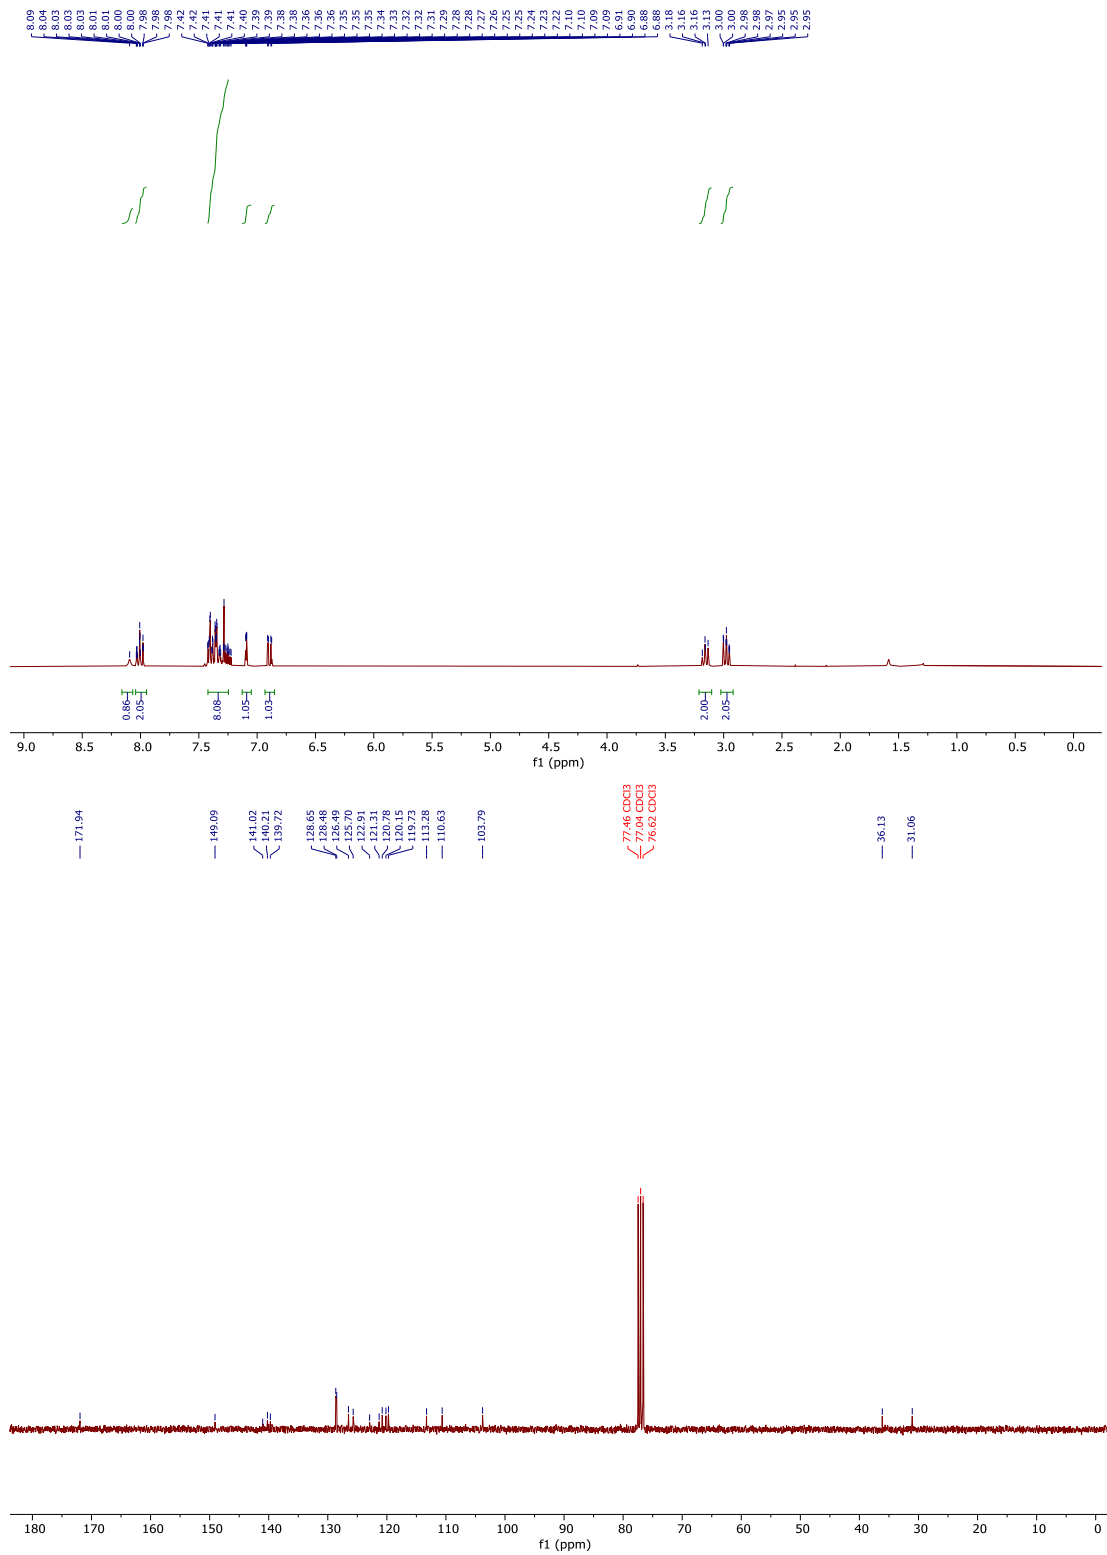

4-Fluorophenyl 3-phenylpropanoate (40)

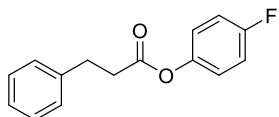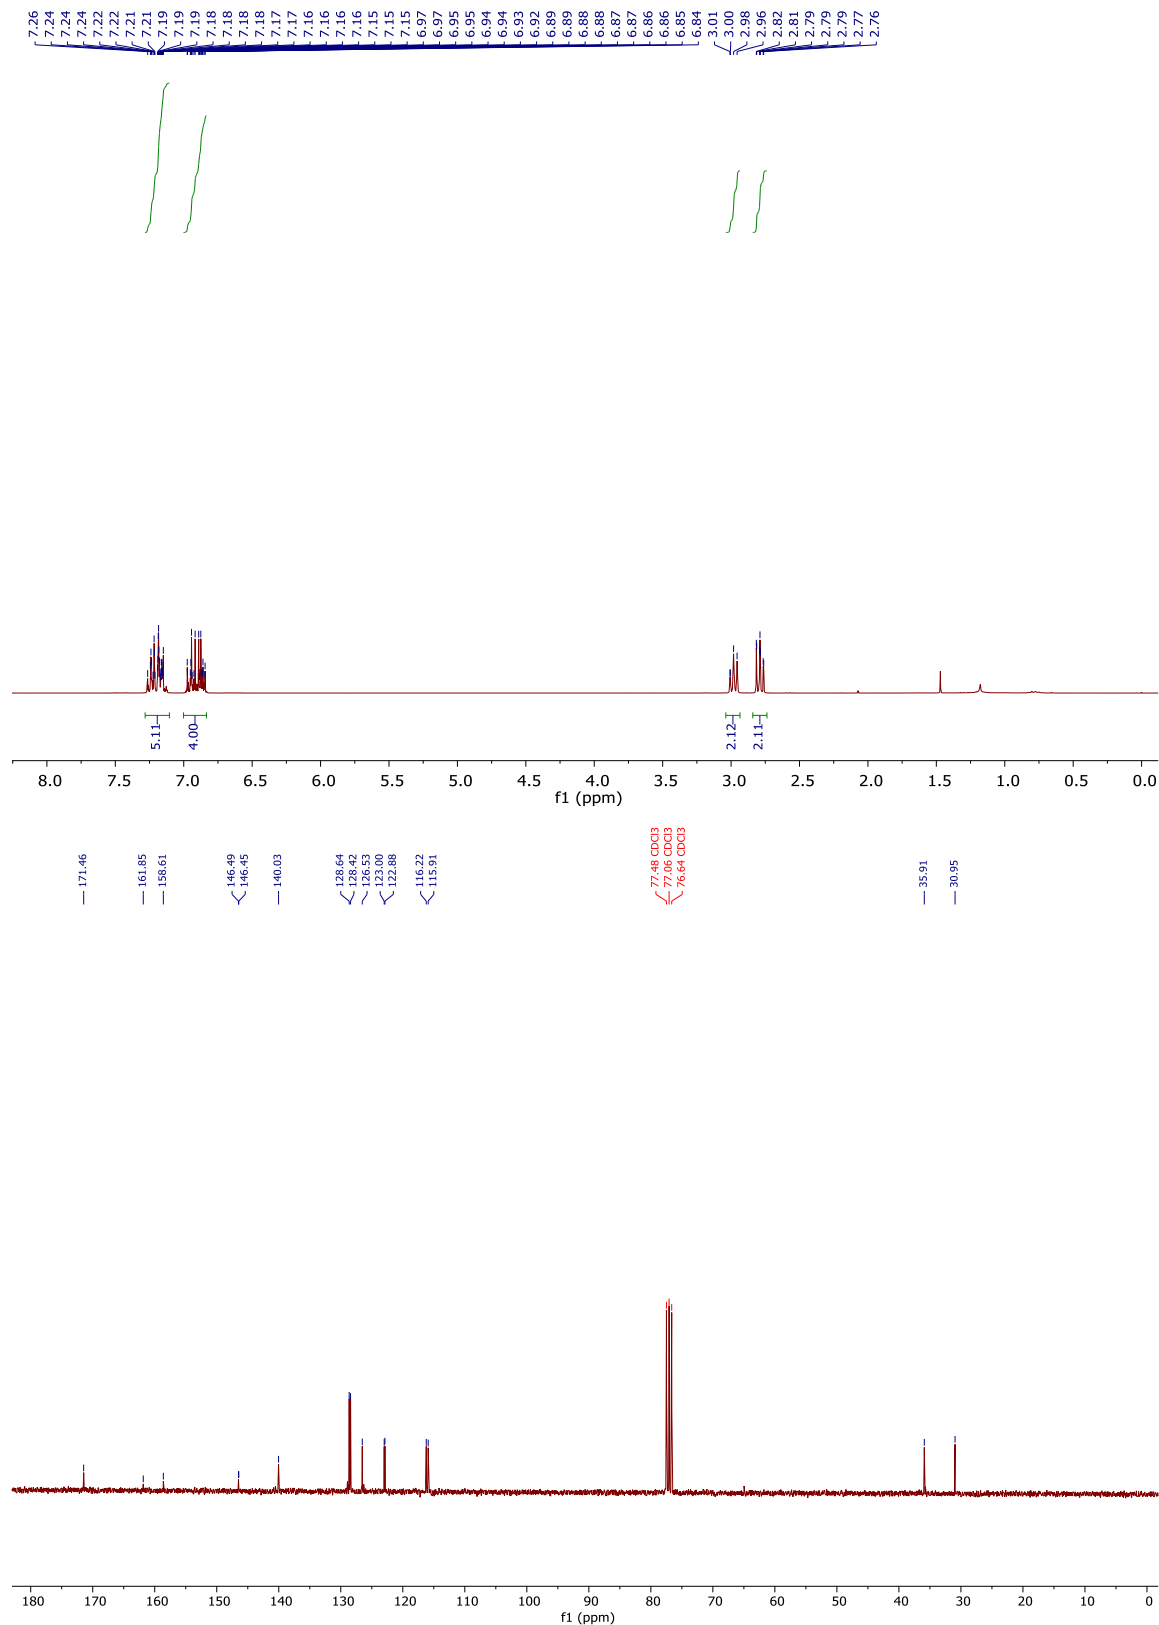

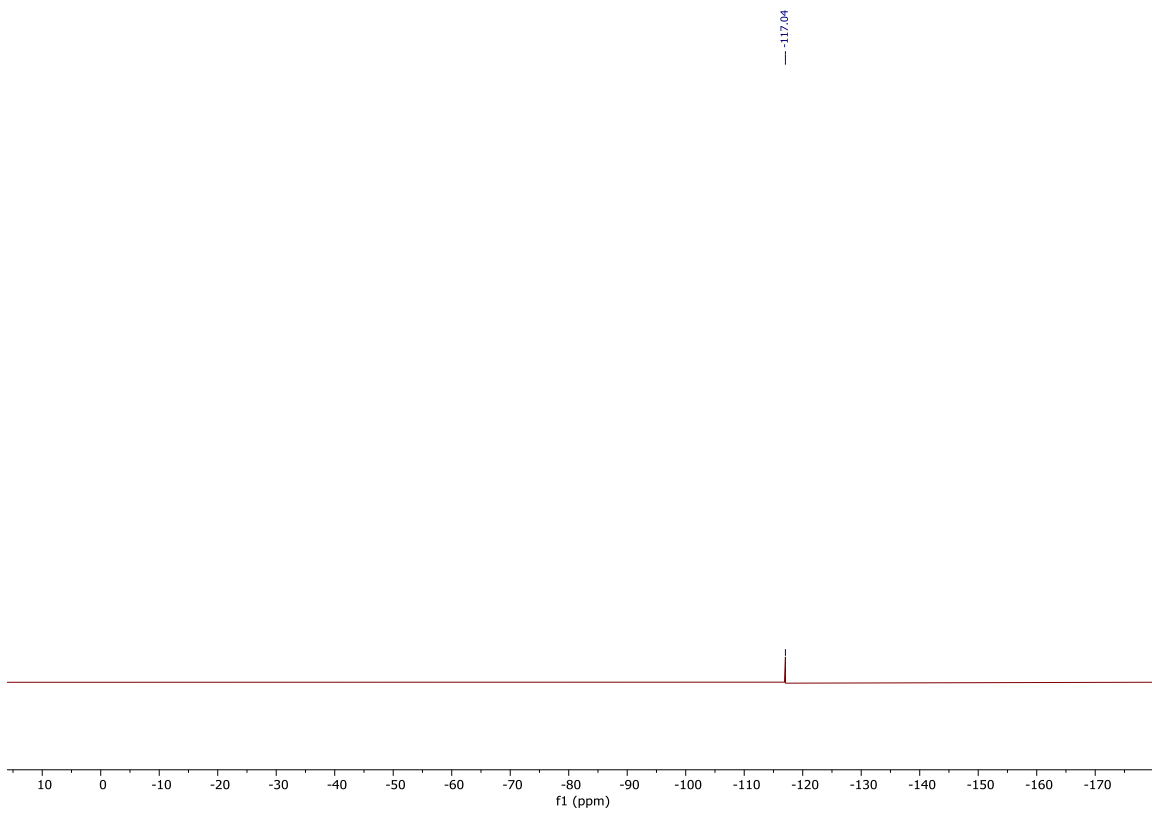

2-Fluorophenyl 3-phenylpropanoate (41)

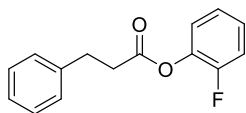

7.27  
7.25  
7.24  
7.23  
7.22  
7.21  
7.21  
7.20  
7.20  
7.19  
7.18  
7.18  
7.17  
7.17  
7.16  
7.13  
7.13  
7.12  
7.11  
7.11  
7.10  
7.09  
7.09  
7.08  
7.07  
7.07  
7.06  
7.06  
7.04  
7.04  
7.04  
7.03  
7.03  
7.02  
7.01  
7.01  
7.00  
7.00  
6.99  
6.99  
6.97  
6.97  
6.97  
3.04  
3.04  
3.02  
3.02  
3.01  
2.99  
2.88  
2.88  
2.87  
2.85  
2.85  
2.83  
2.82

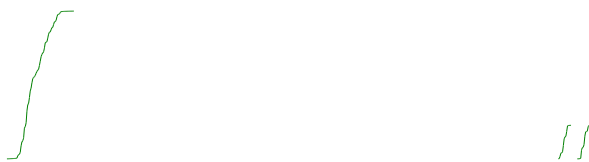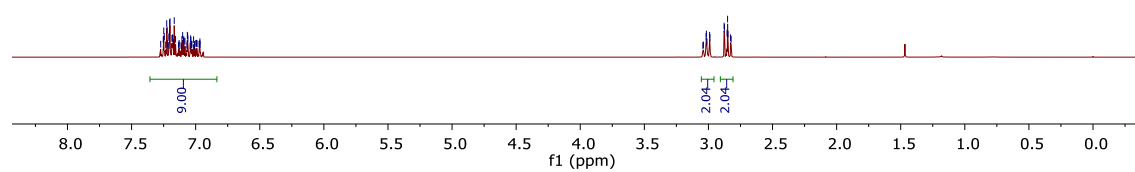

170.39  
155.76  
152.46  
140.01  
138.19  
138.02  
128.61  
128.38  
127.13  
127.03  
126.48  
124.42  
123.74  
116.82  
116.58  
77.47  
77.25  
77.04  
76.62  
35.53  
30.90

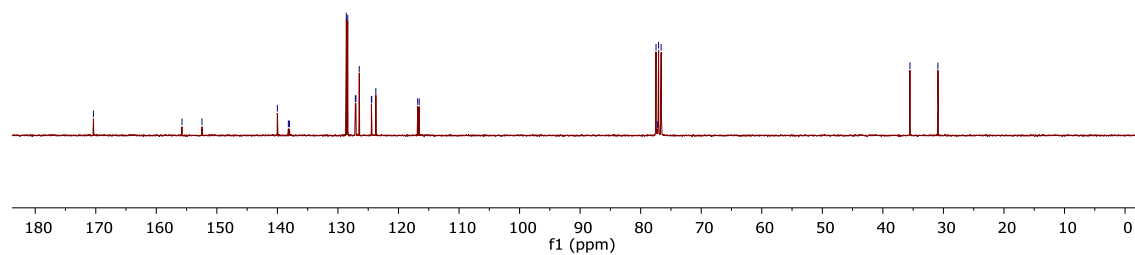

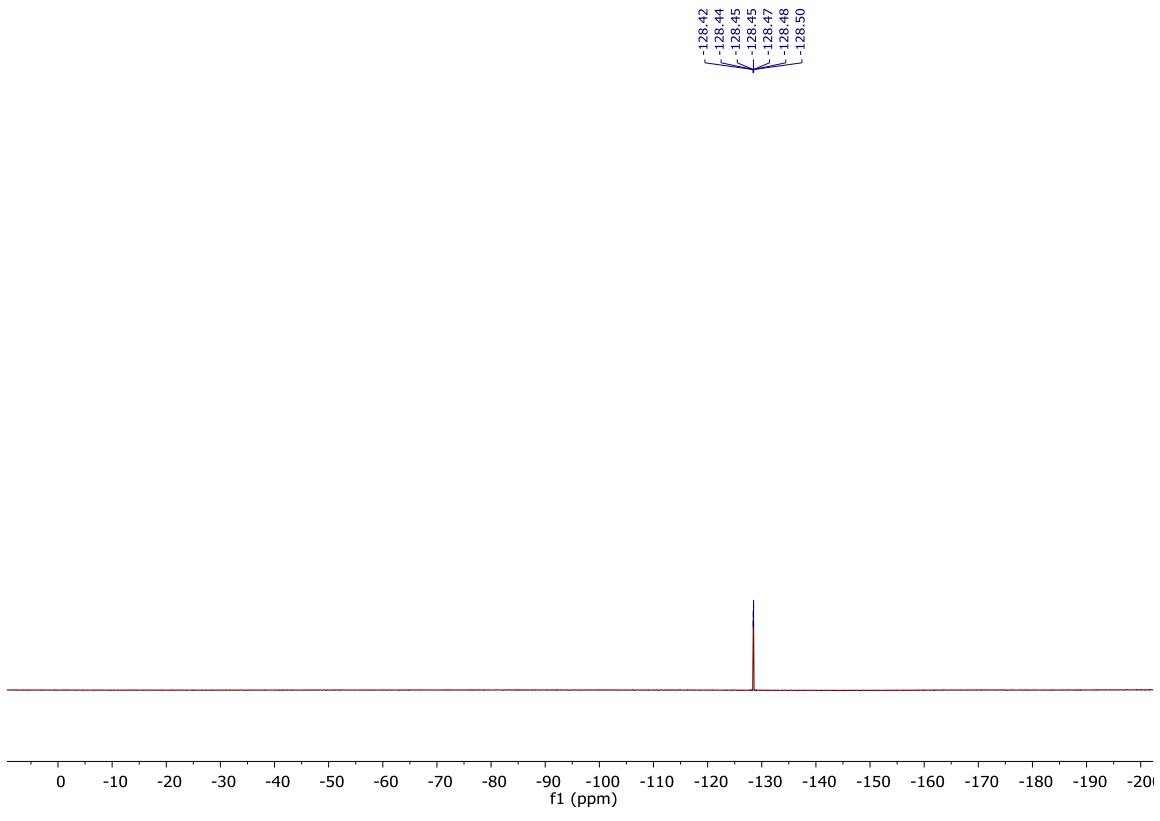

3-Fluorophenyl 3-phenylpropanoate (42)

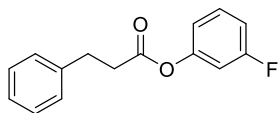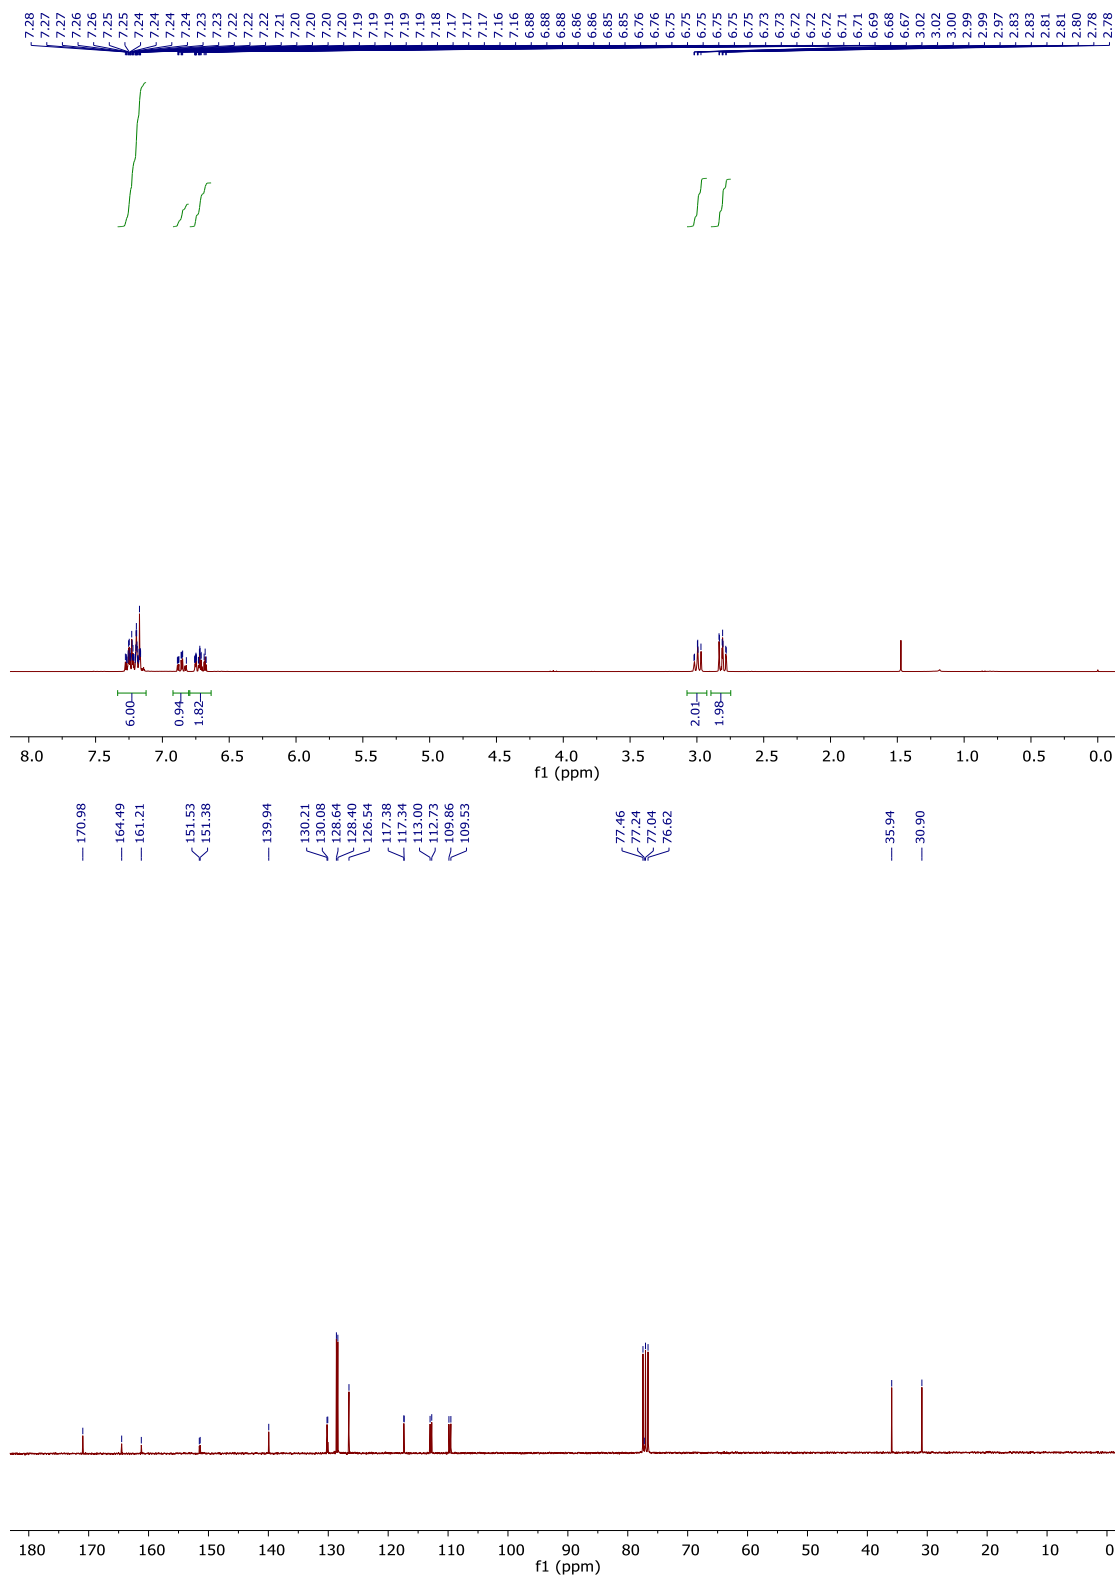

-111.08  
-111.09  
-111.11  
-111.12  
-111.14

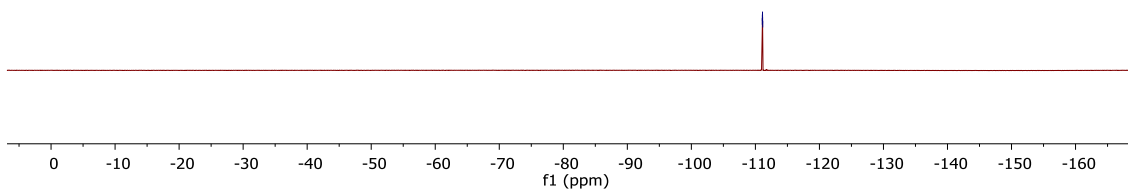





4-Acetylphenyl 3-phenylpropanoate (**44**)

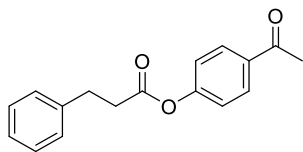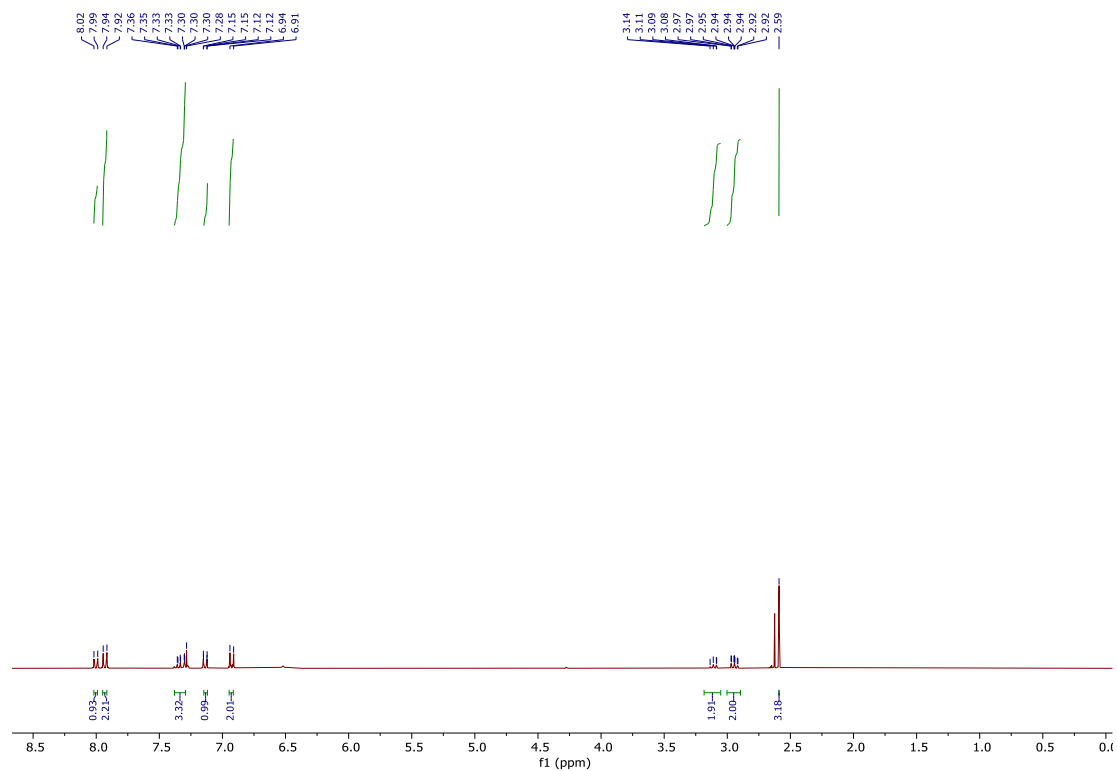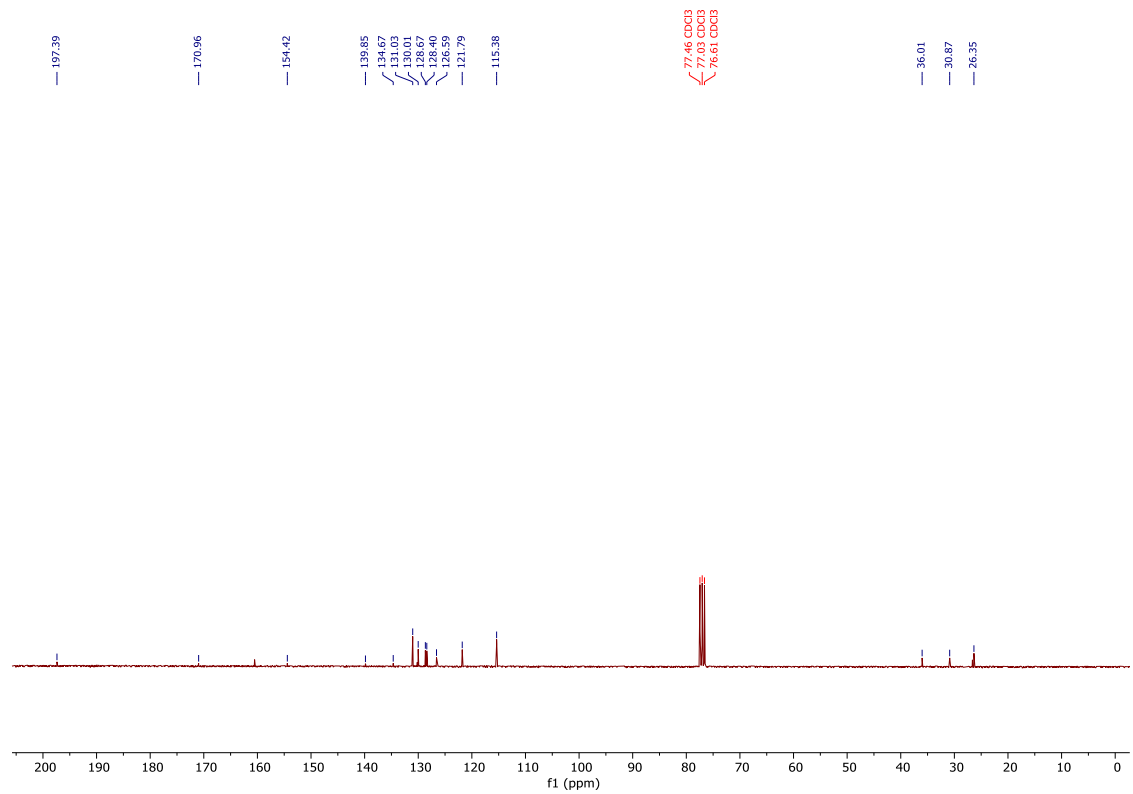

*o*-Tolyl 3-phenylpropanoate (45)

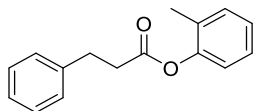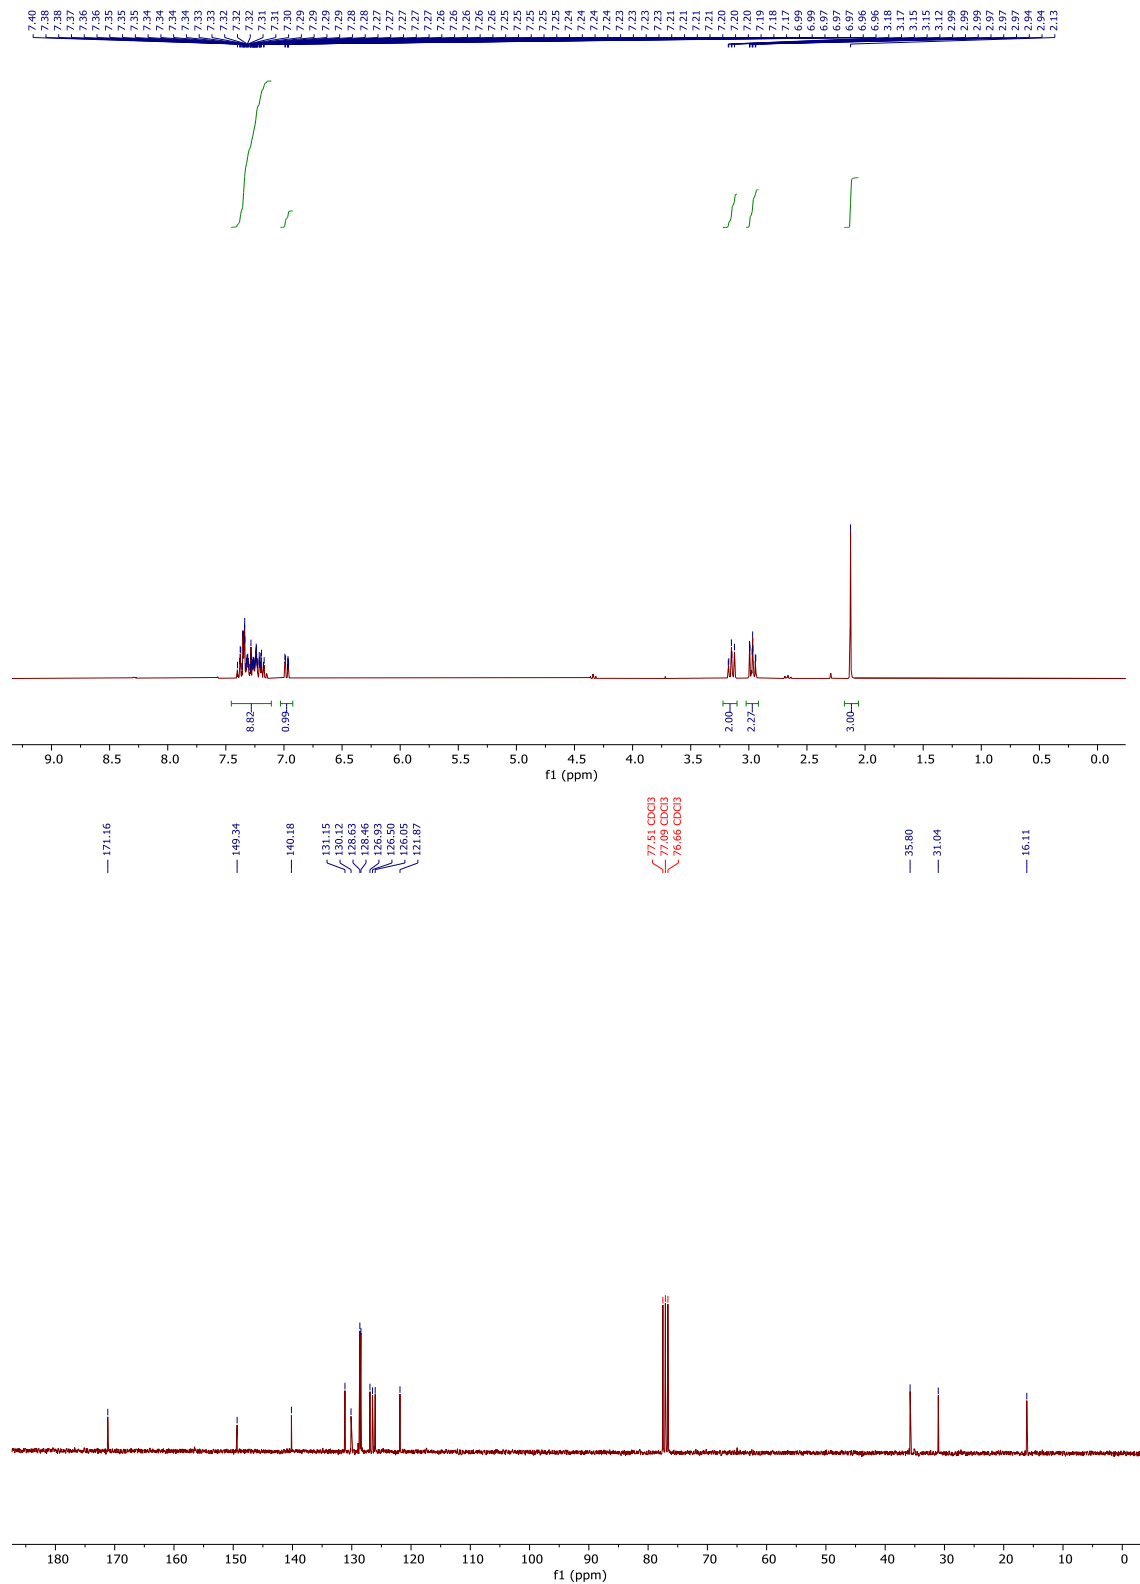

*m*-Tolyl 3-phenylpropanoate (46)

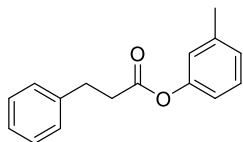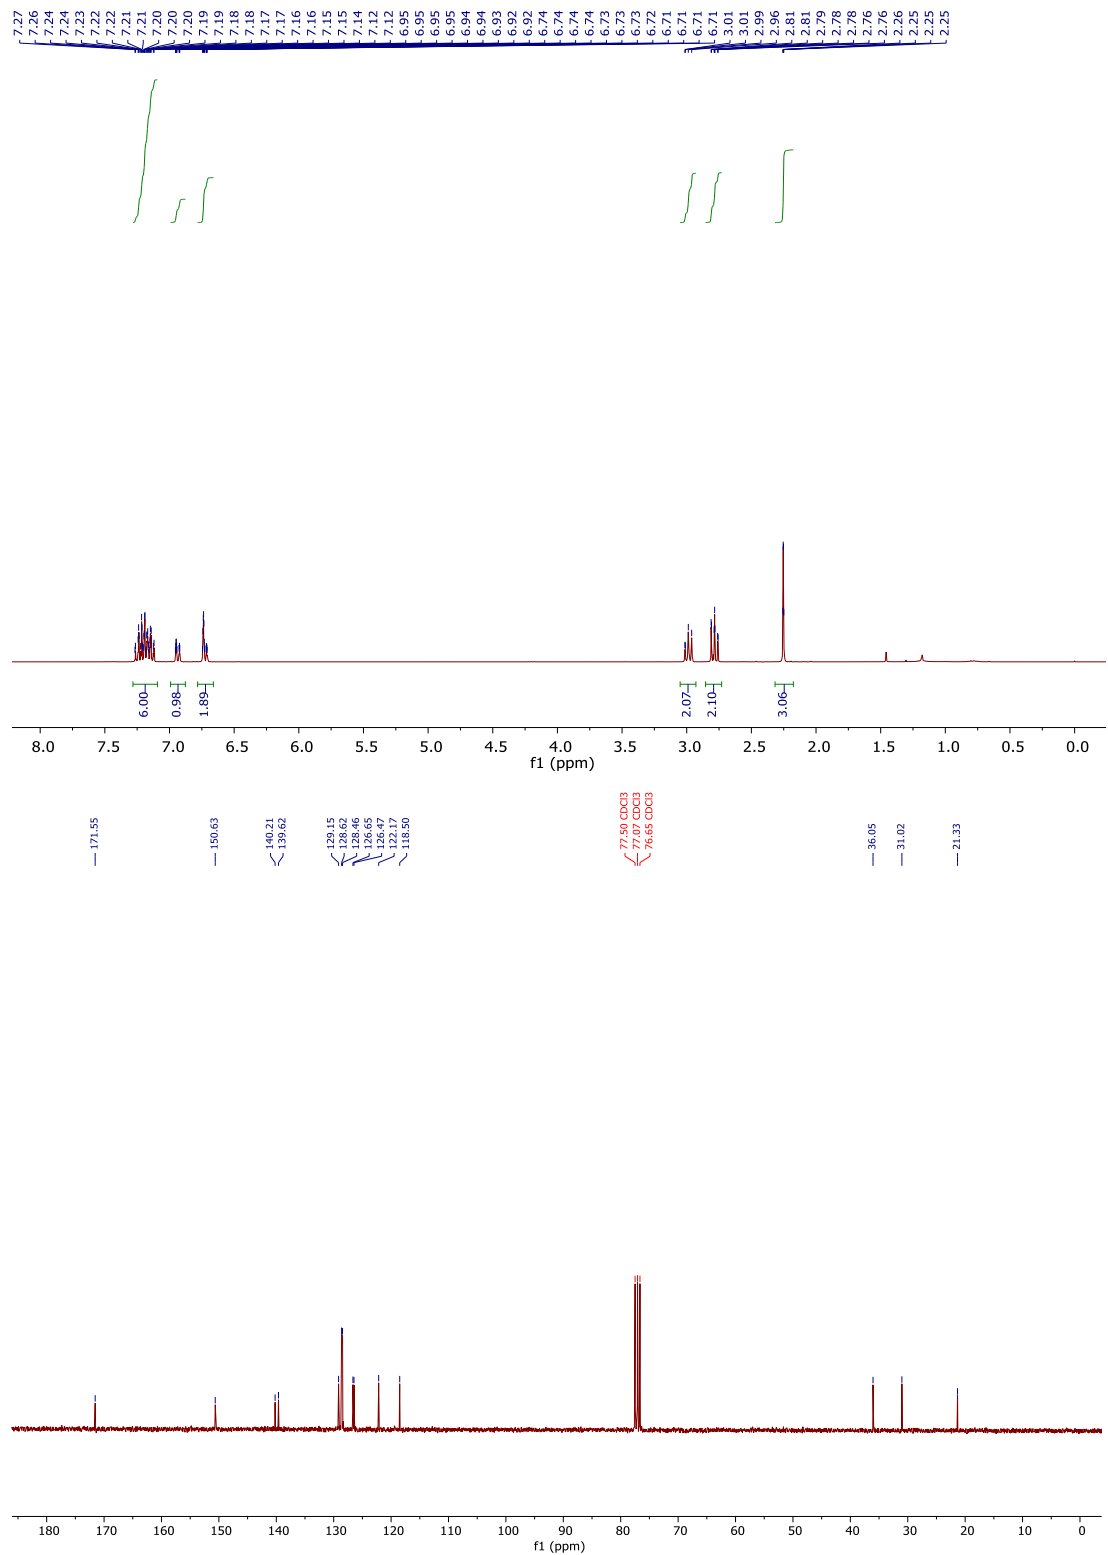

*p*-Tolyl 3-phenylpropanoate (47)

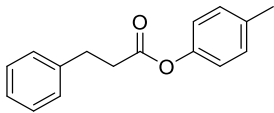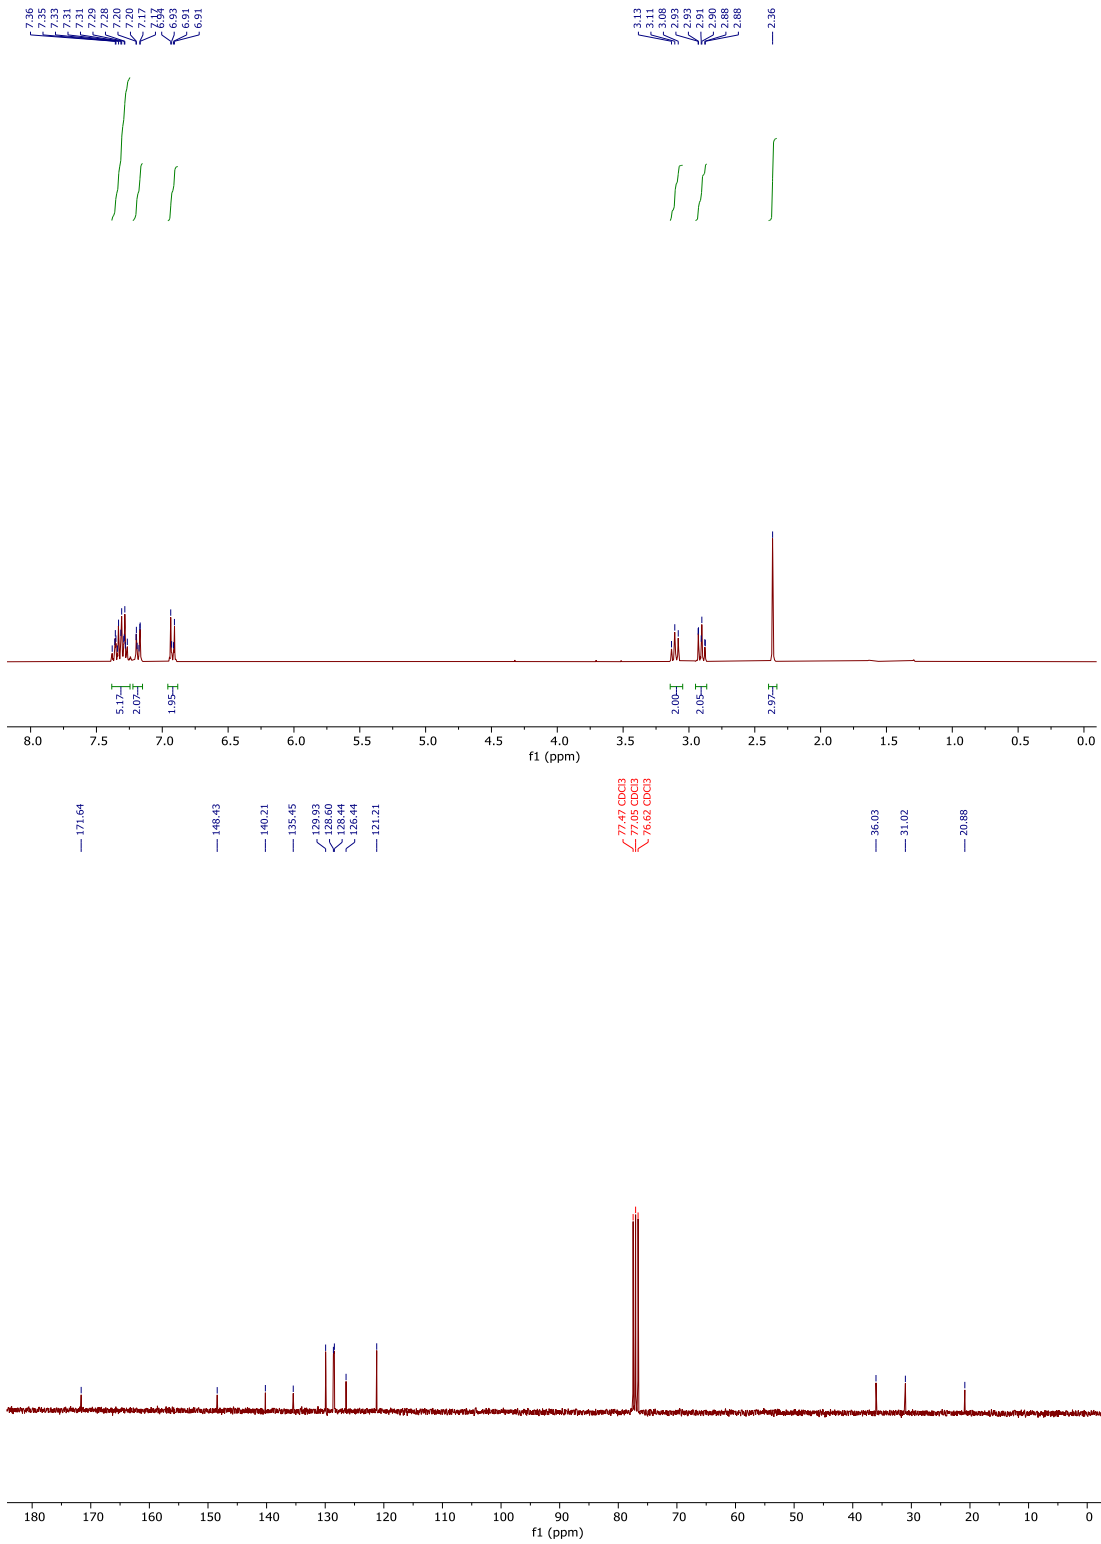

2,6-Dimethylphenyl 3-phenylpropanoate (48)

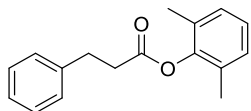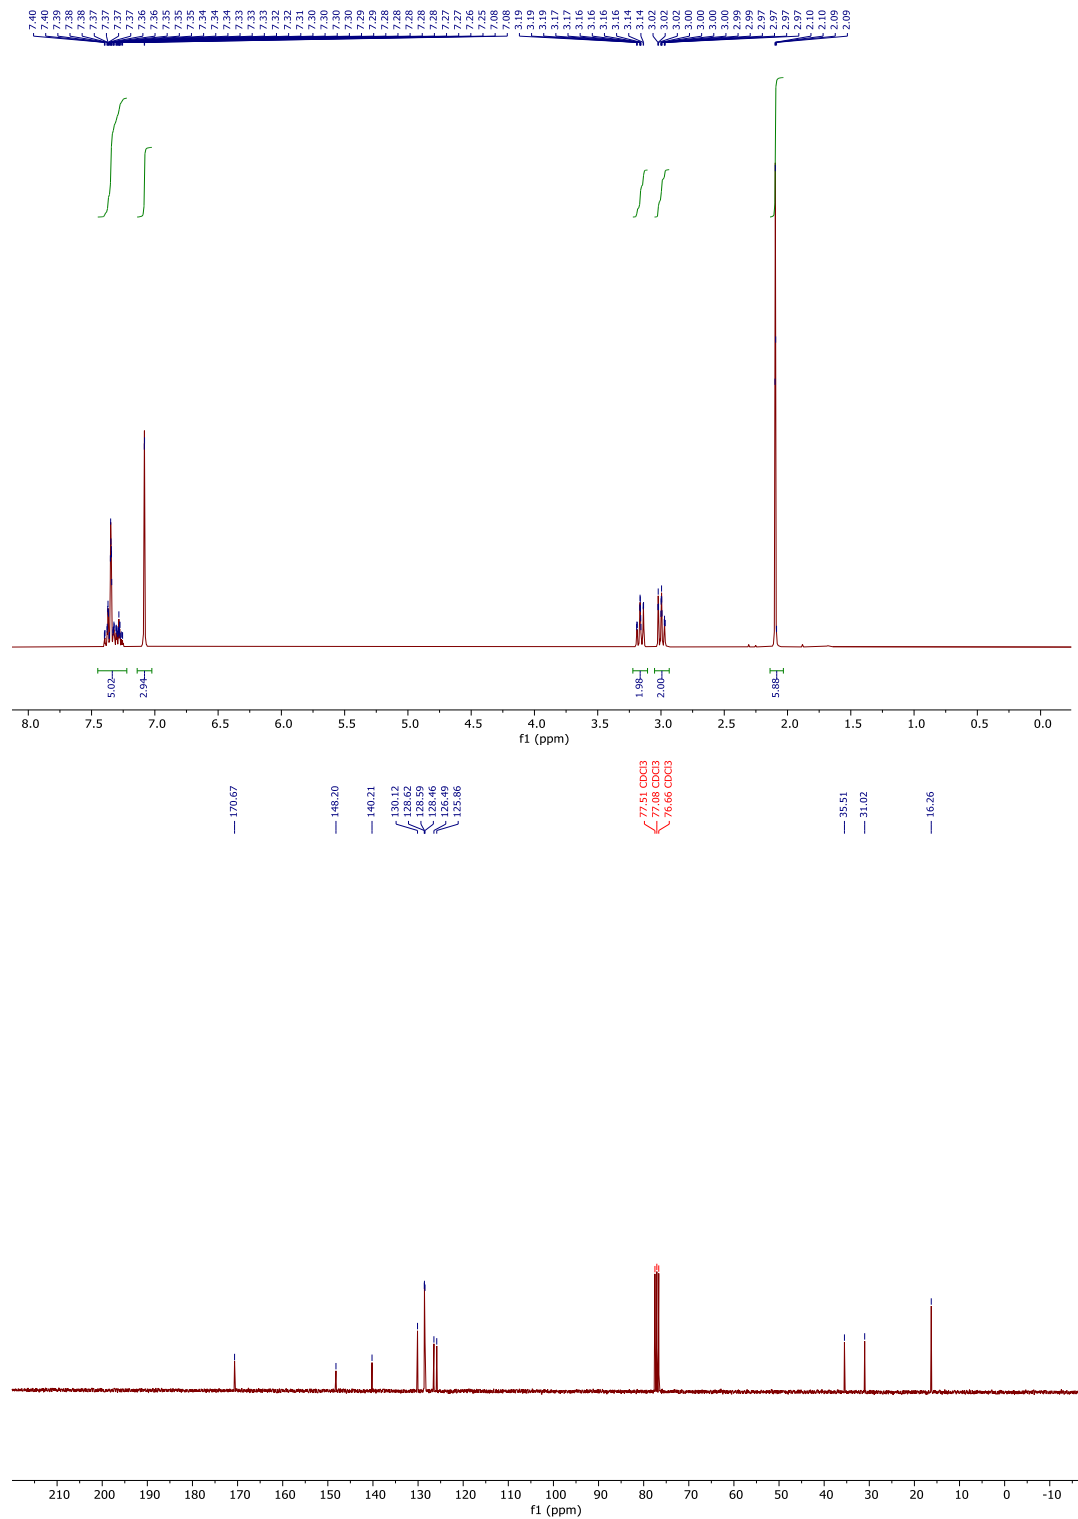

2,4-Dimethylphenyl 3-phenylpropanoate (49)

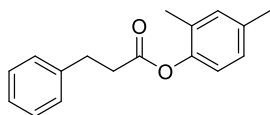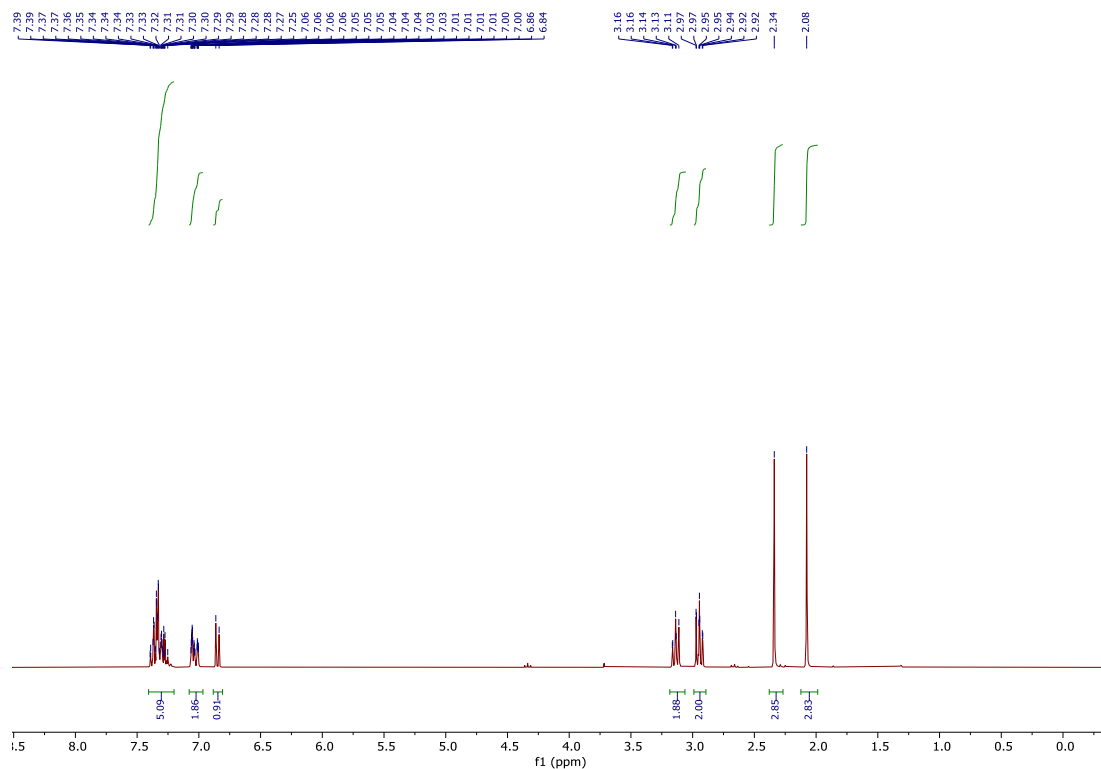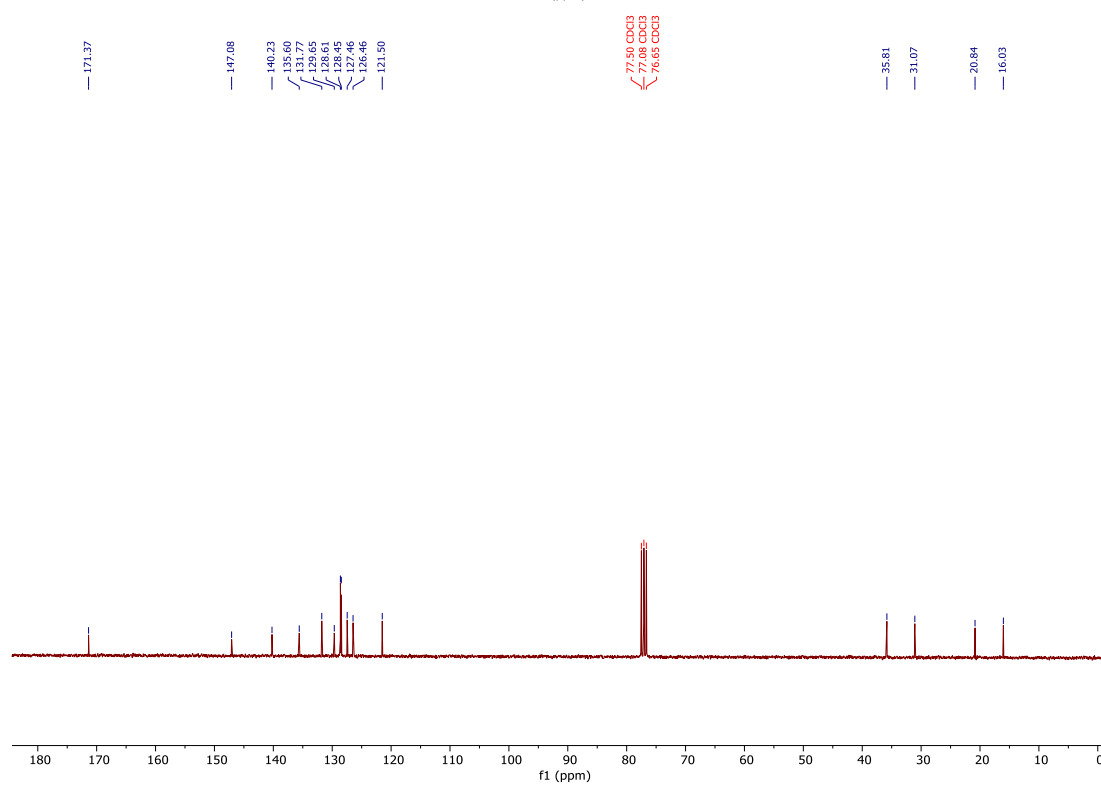

2-*tert*-Butylphenyl 3-phenylpropanoate (**50**)

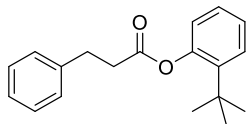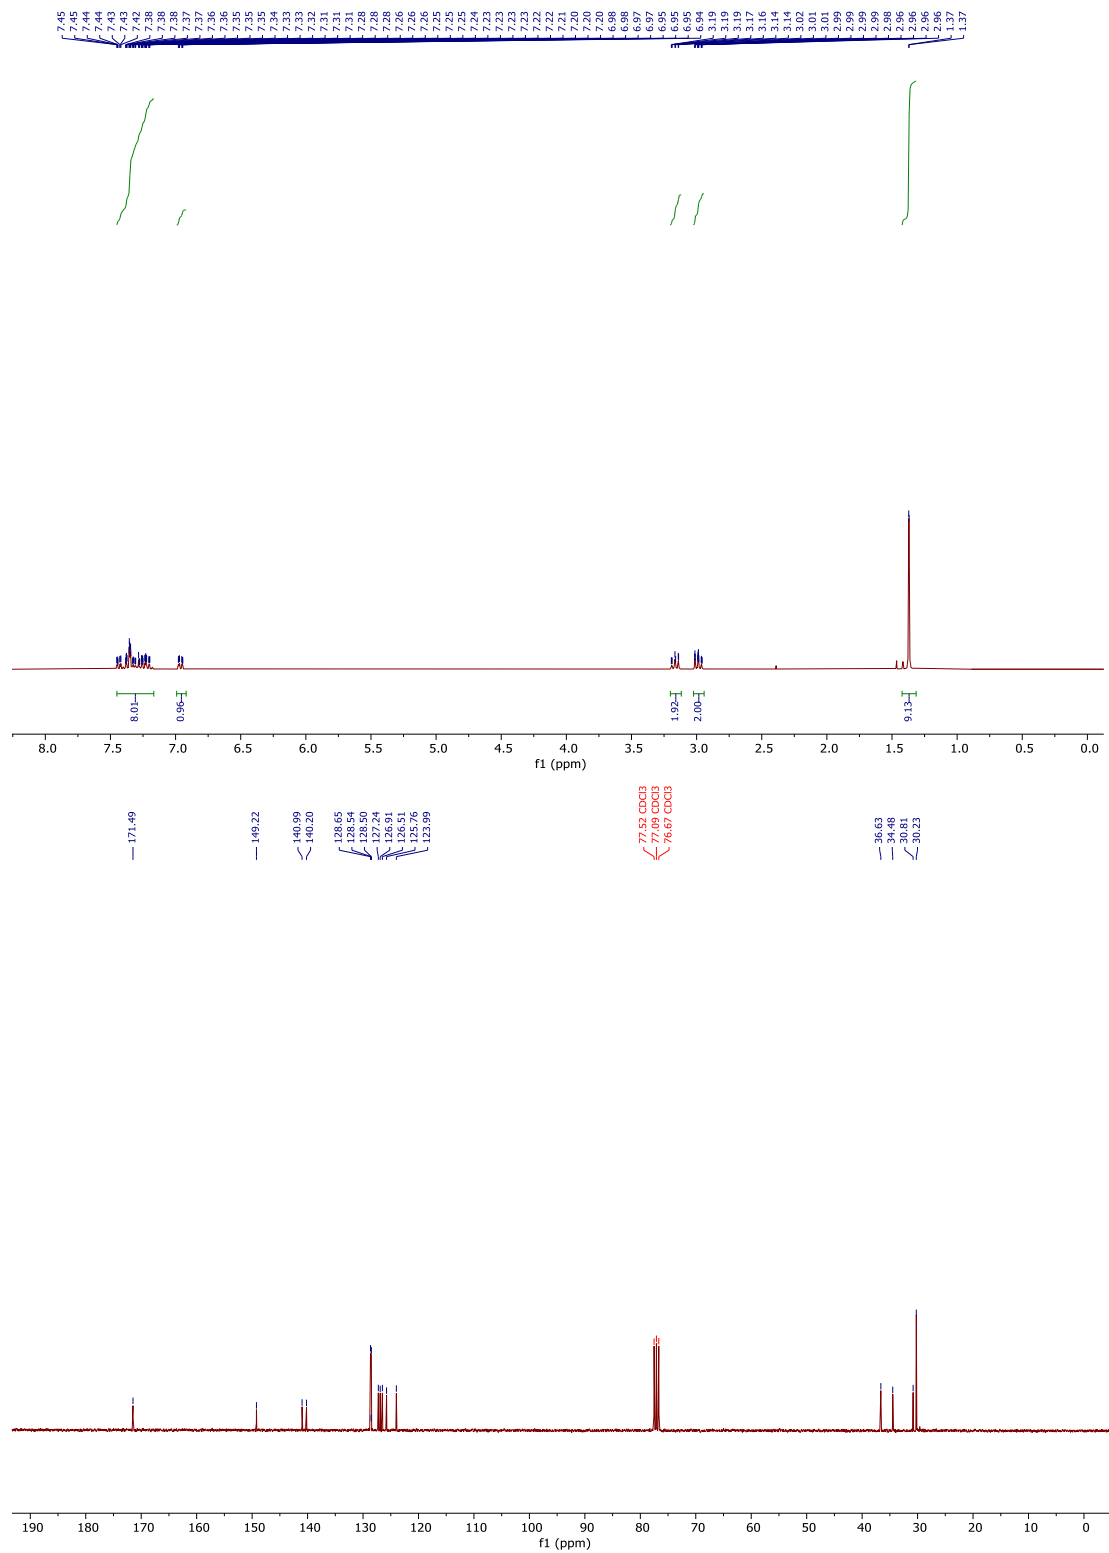



4-*tert*-Butylphenyl 3-phenylpropanoate (**51**)

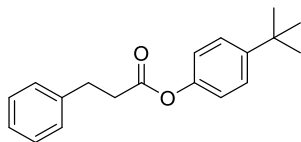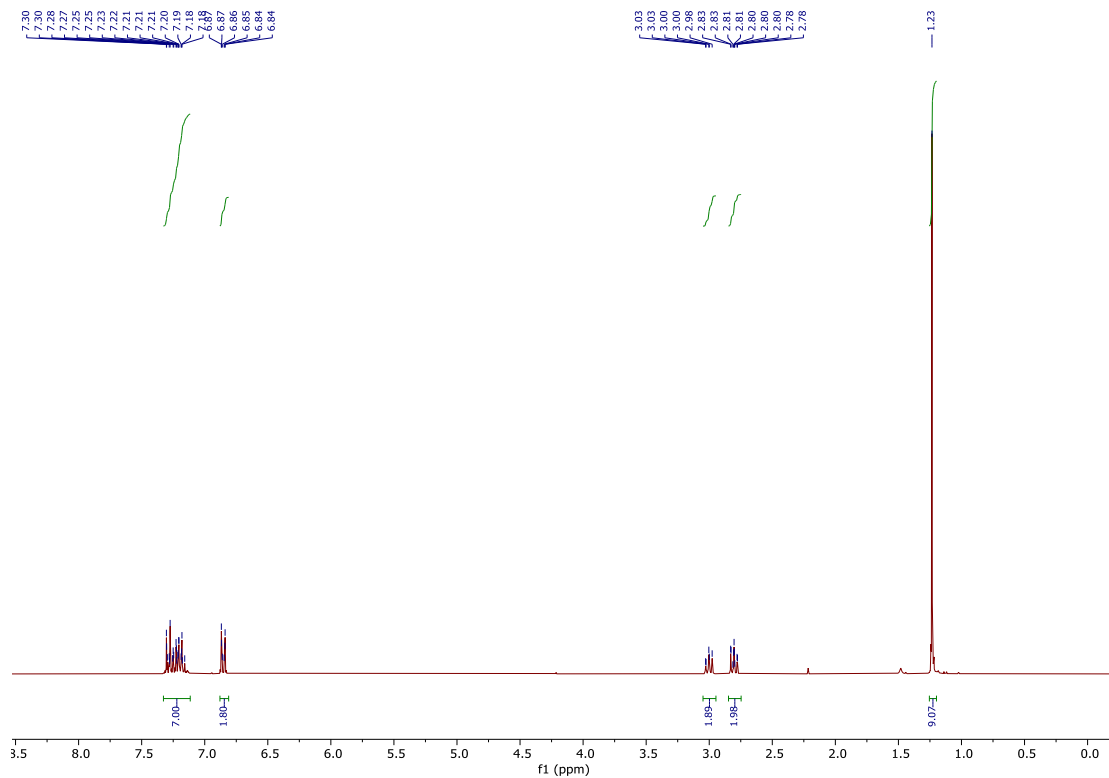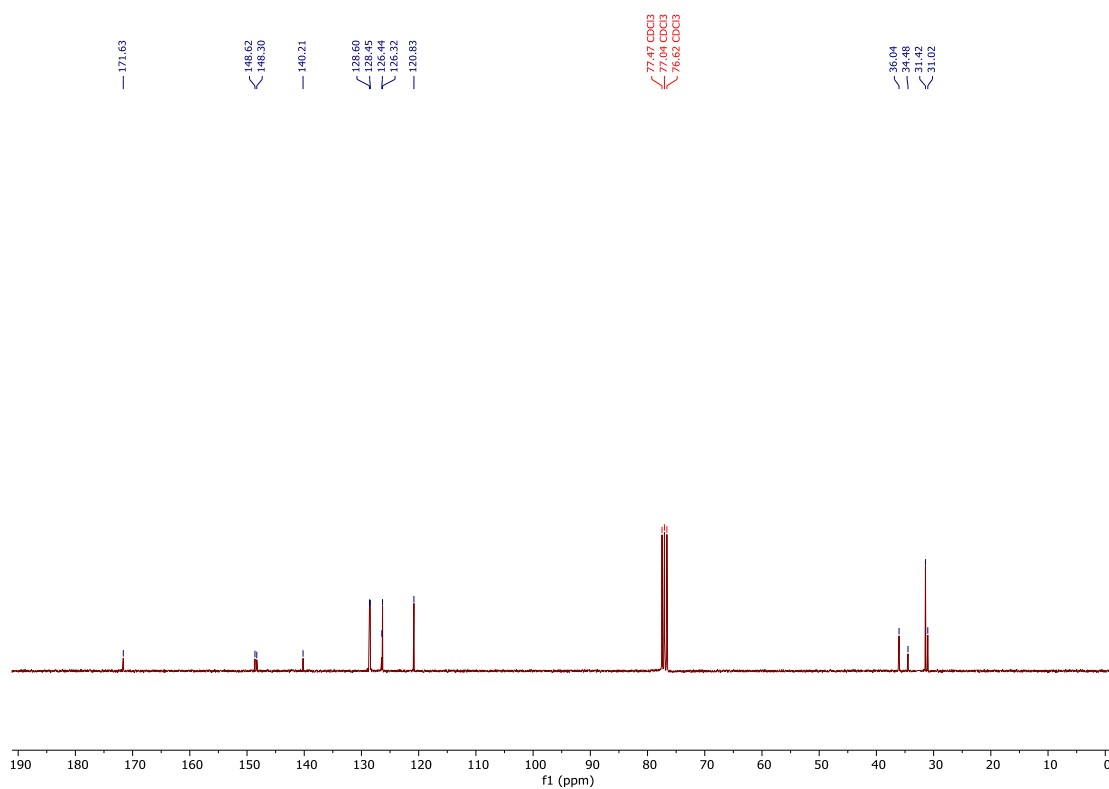

2,4-di-*tert*-Butylphenyl 3-phenylpropanoate (**52**)

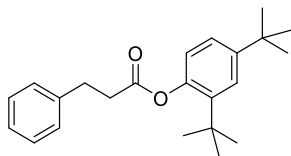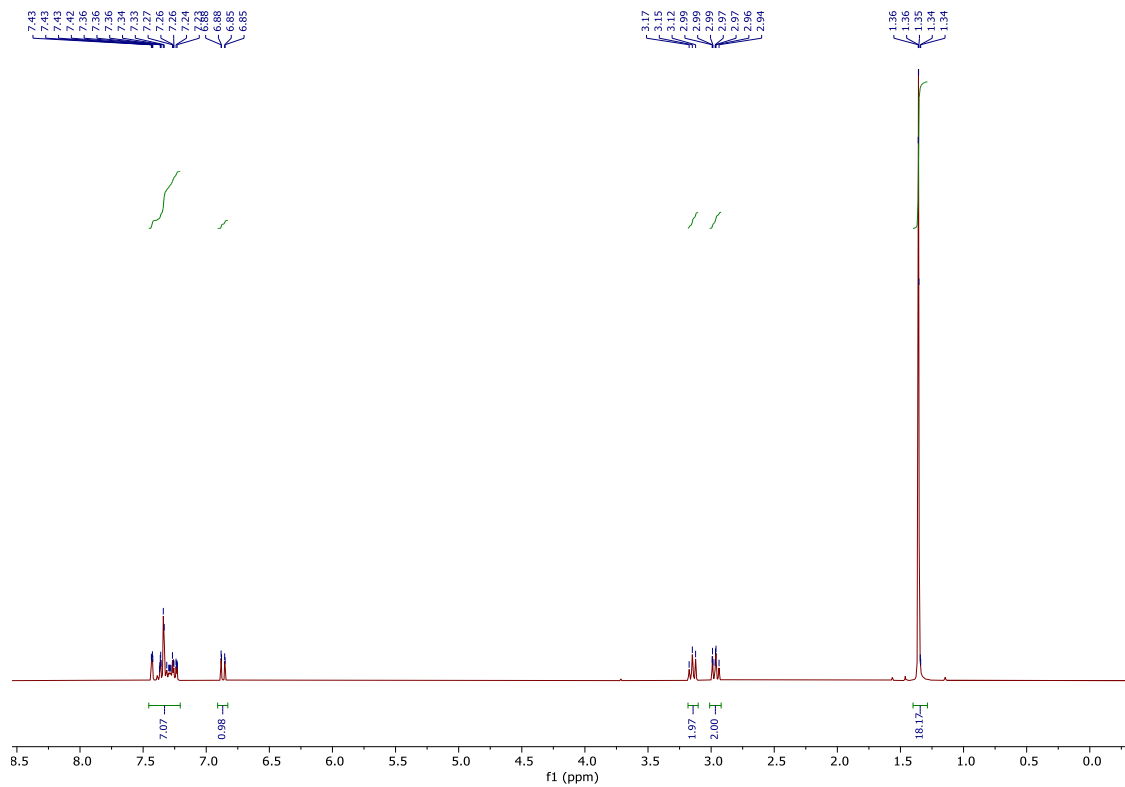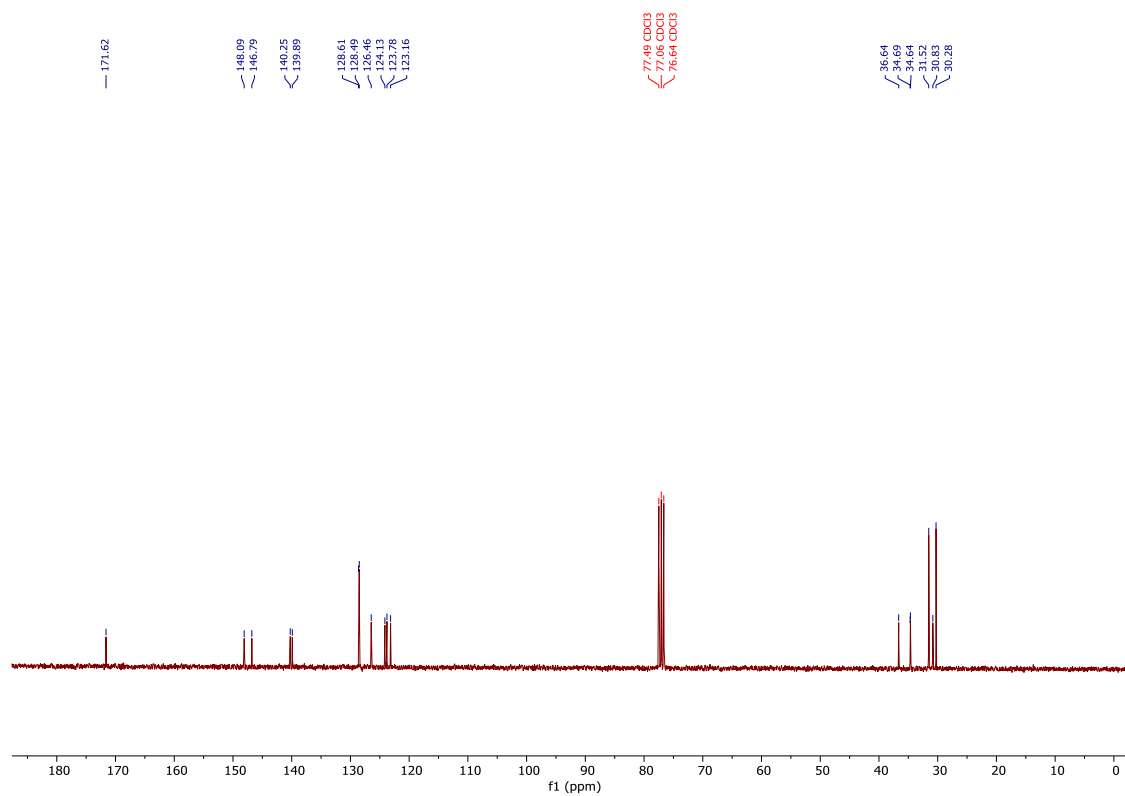

4-Methoxyphenyl 3-phenylpropanoate (**53**)

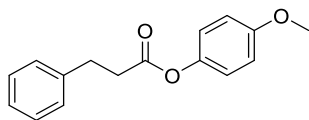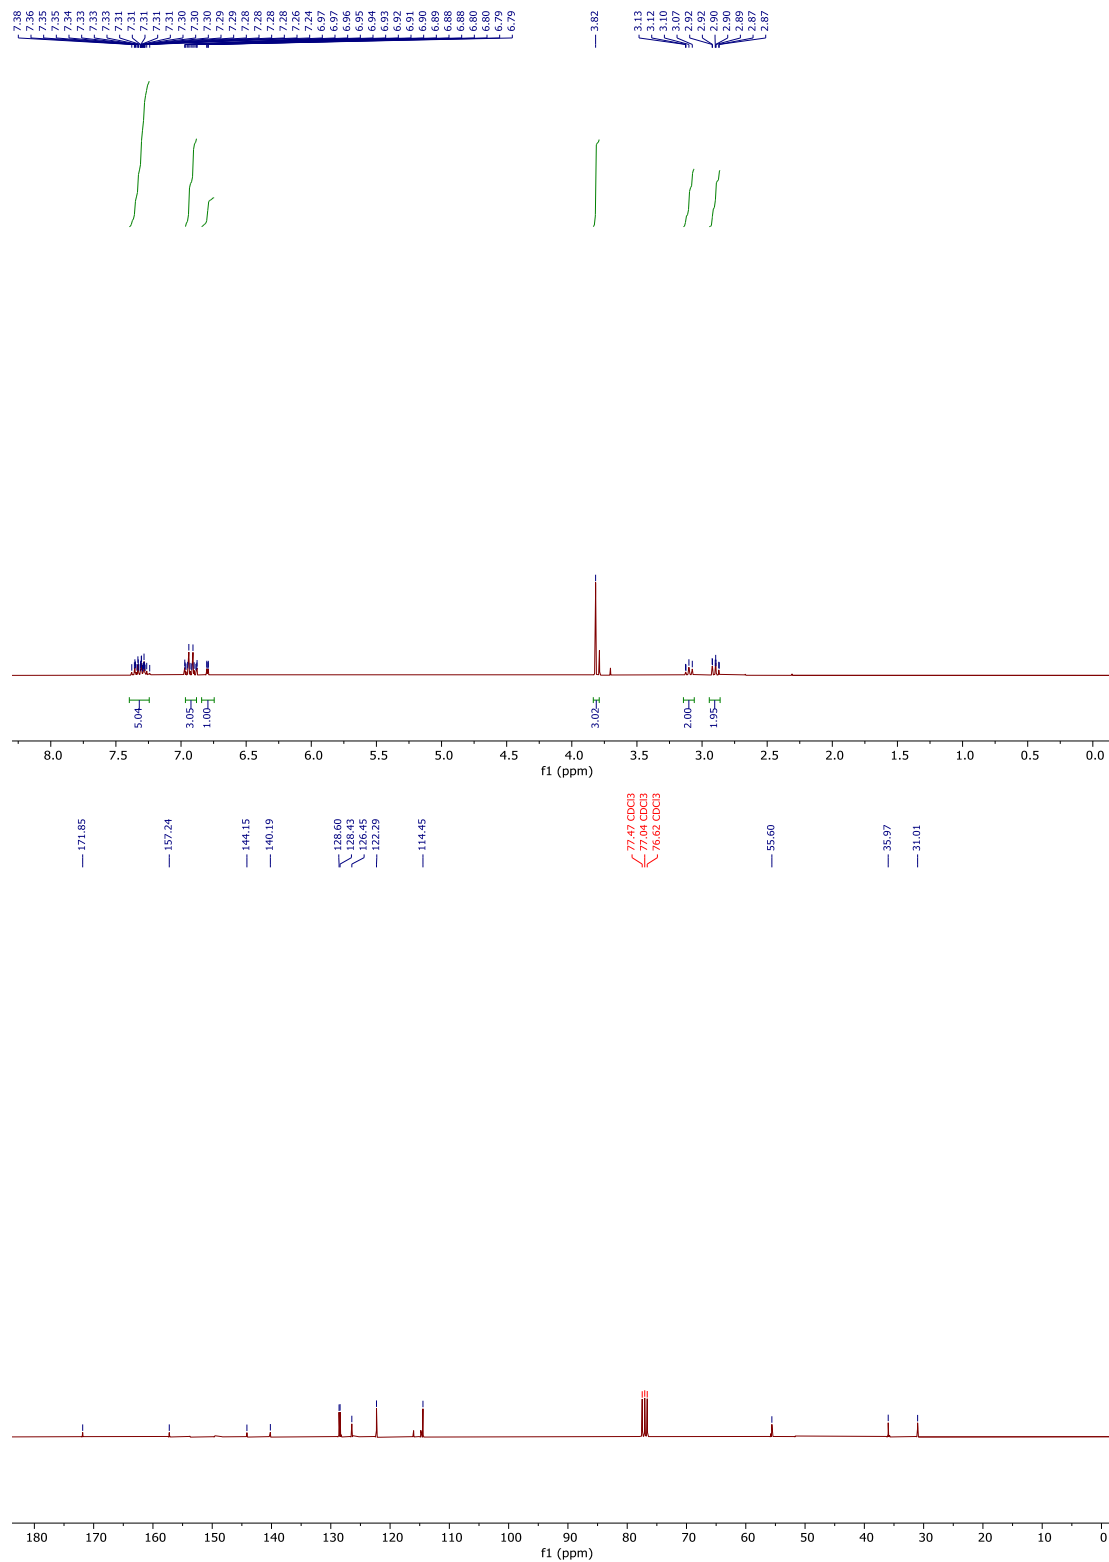

Phenyl butyrate (54)

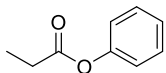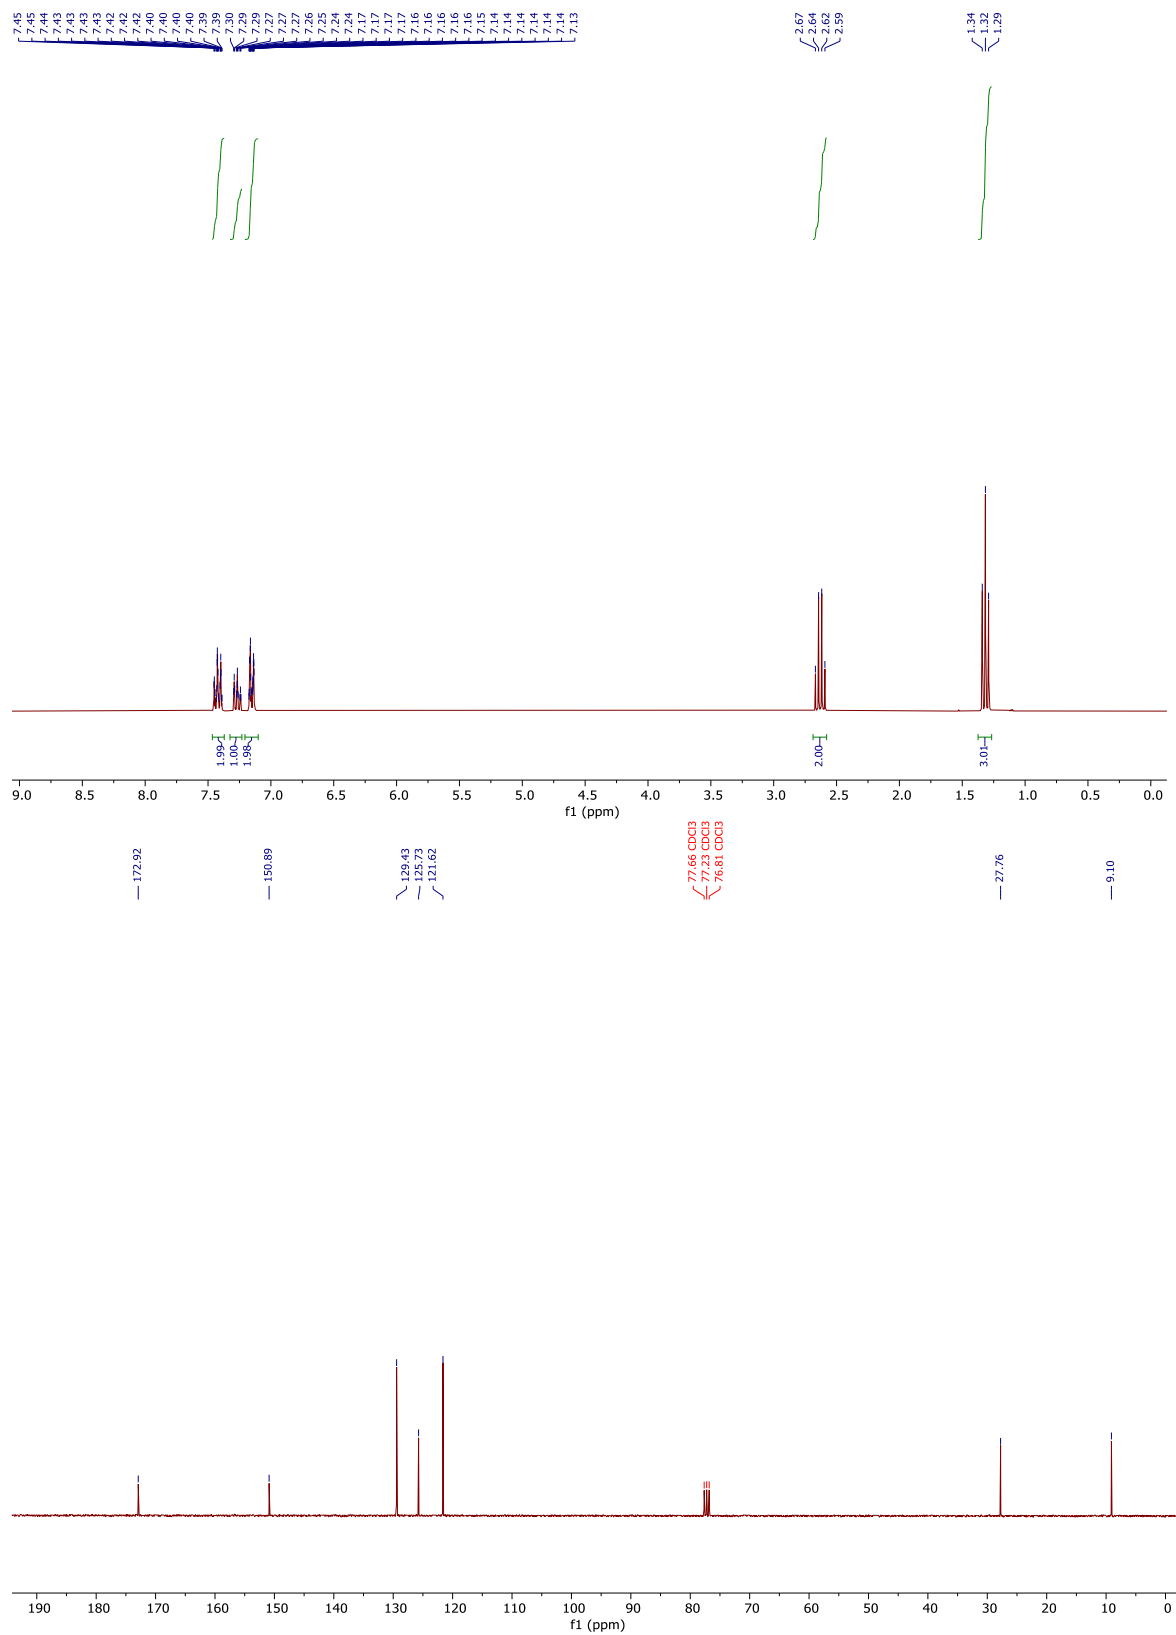

Phenyl hexanoate (55)

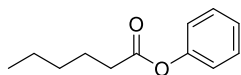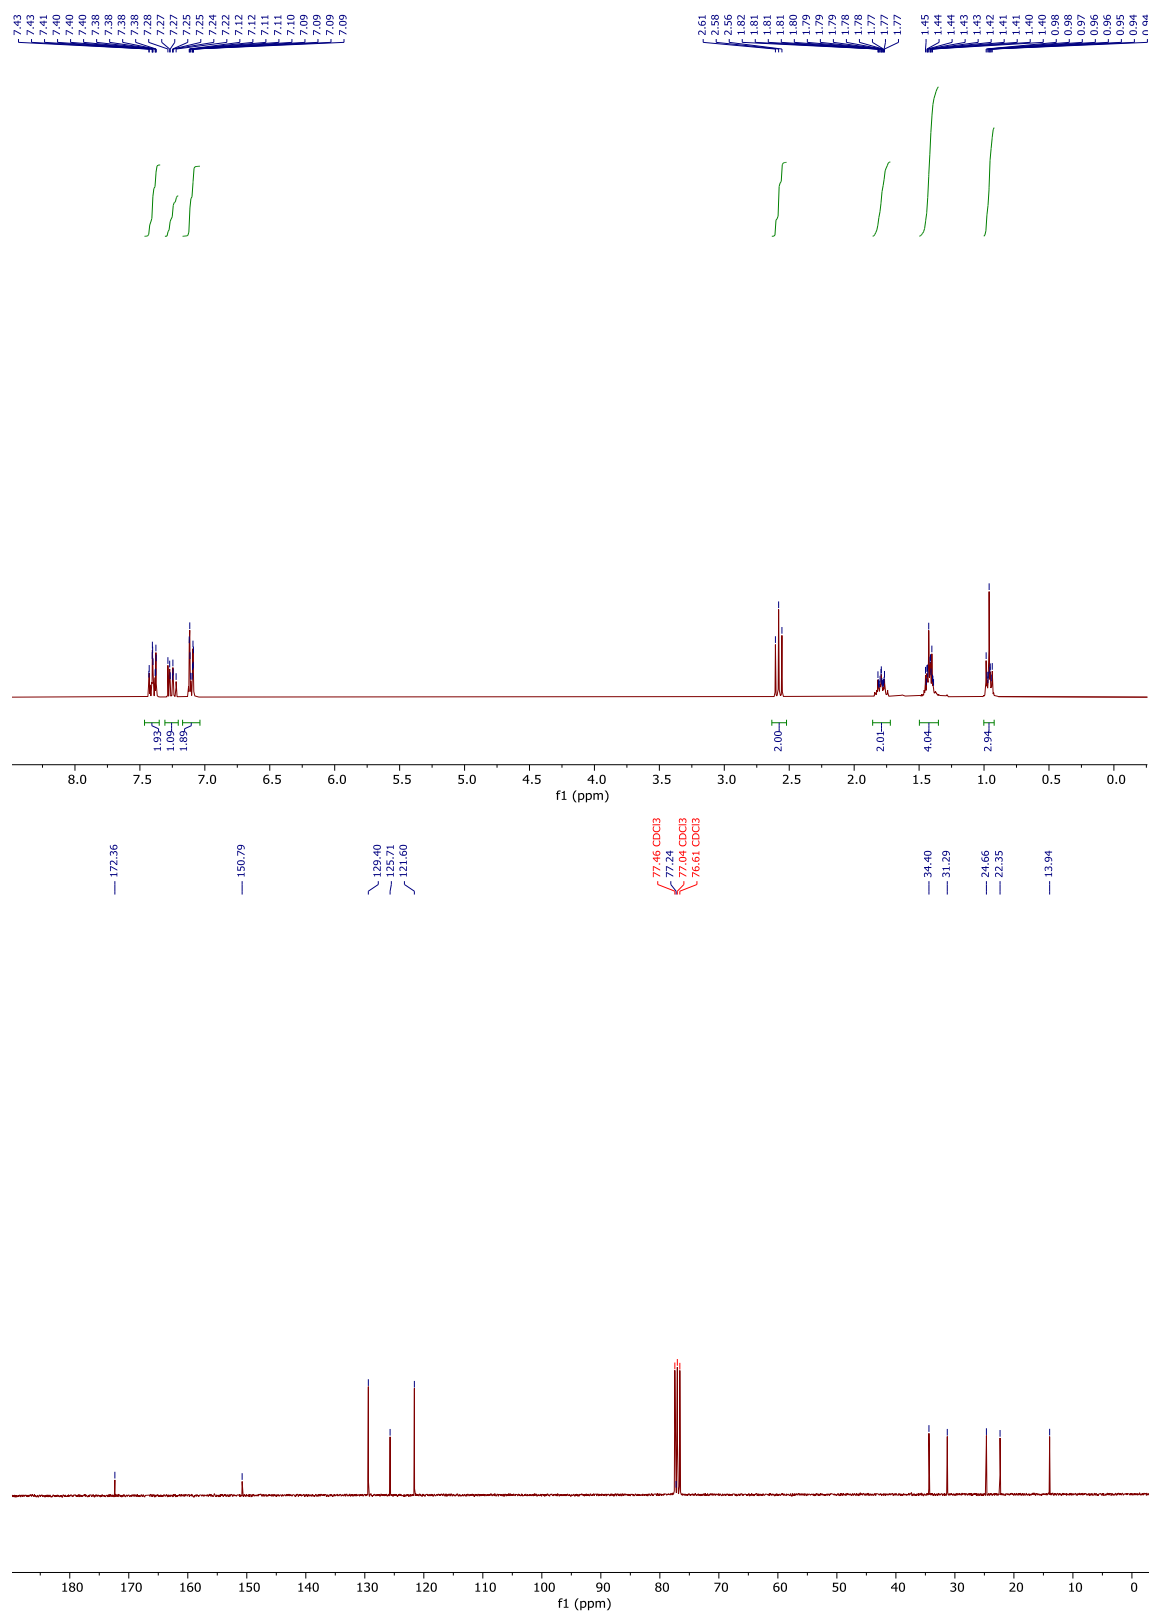

Phenyl nonanoate (**56**)

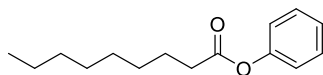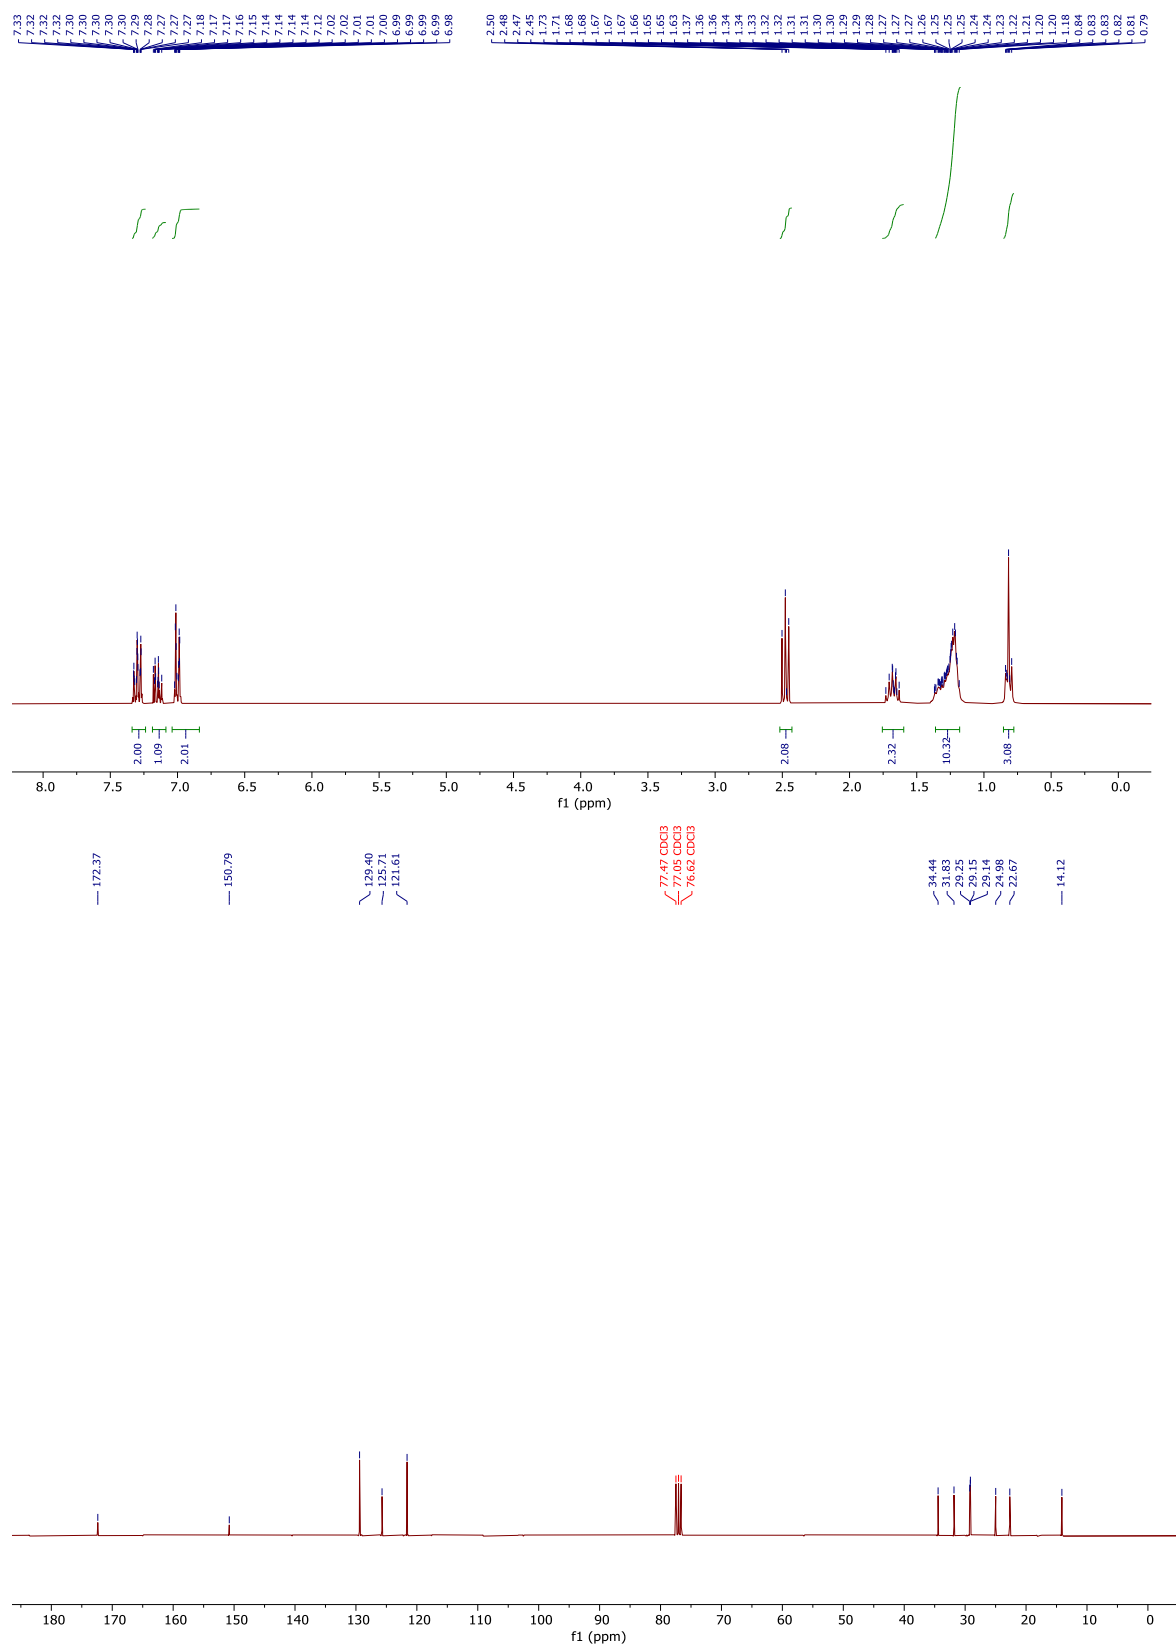

Phenyl tetradecanoate (57)

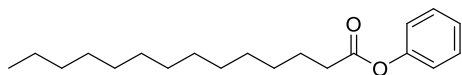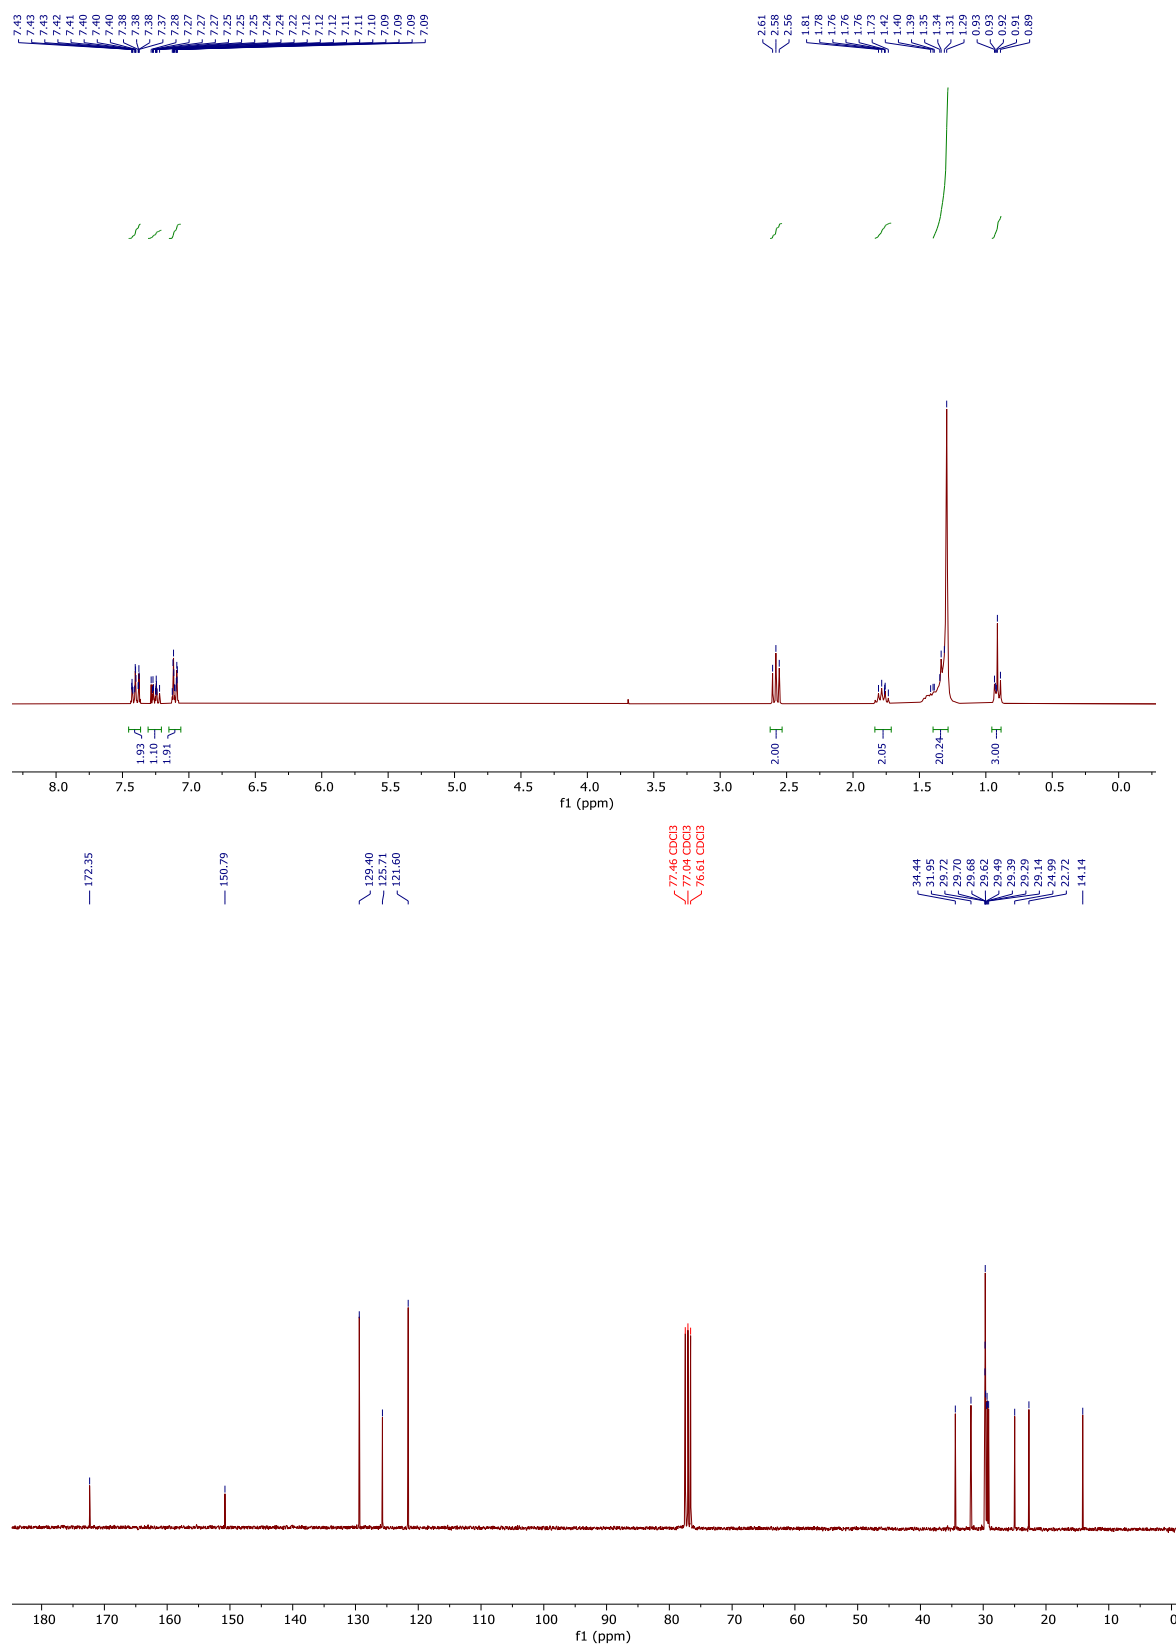

Methyl acetate (58)

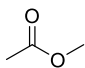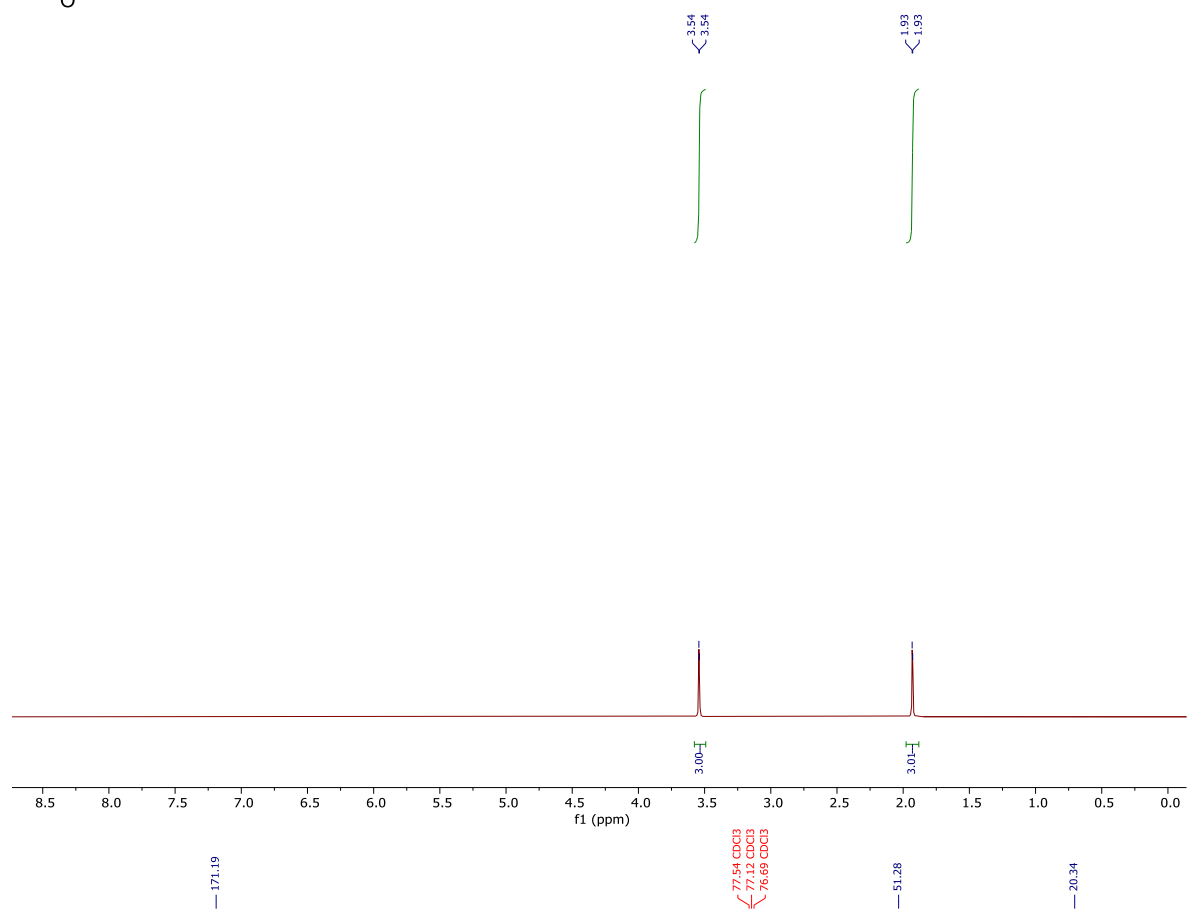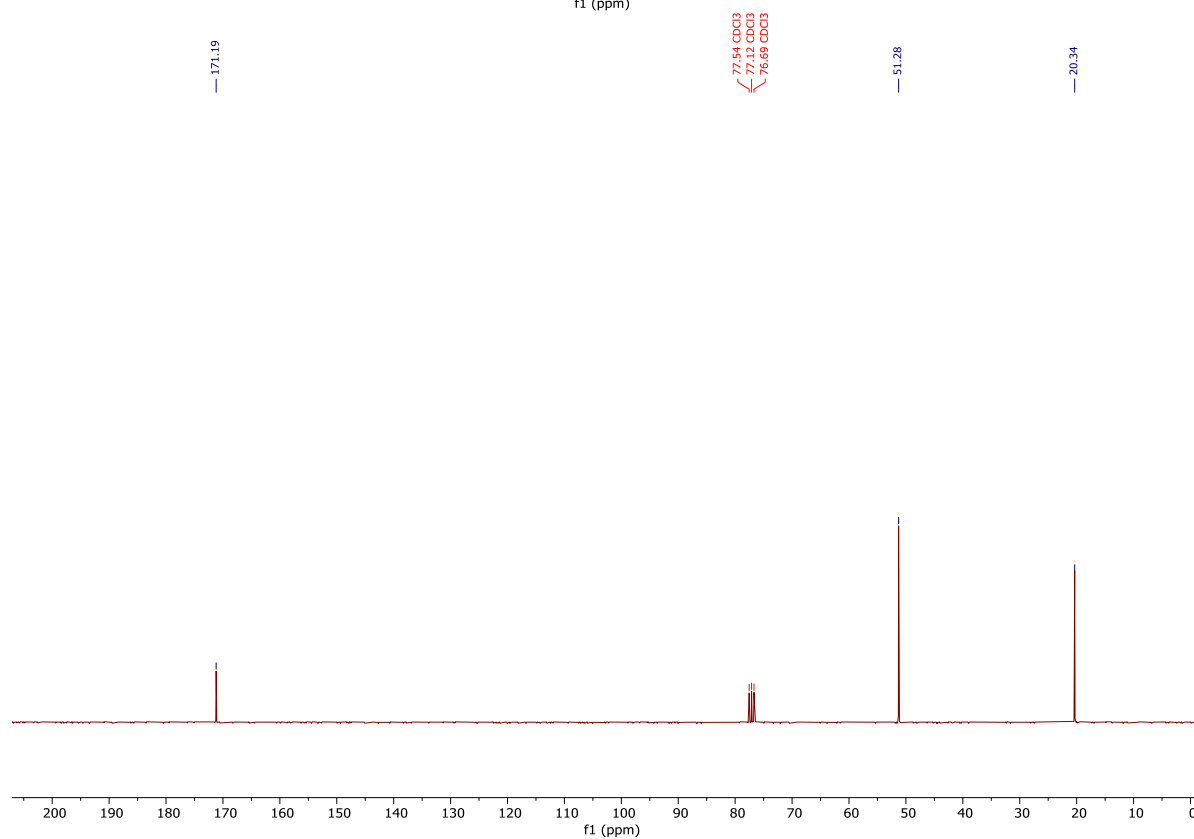



Ethyl acetate (59)

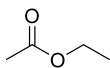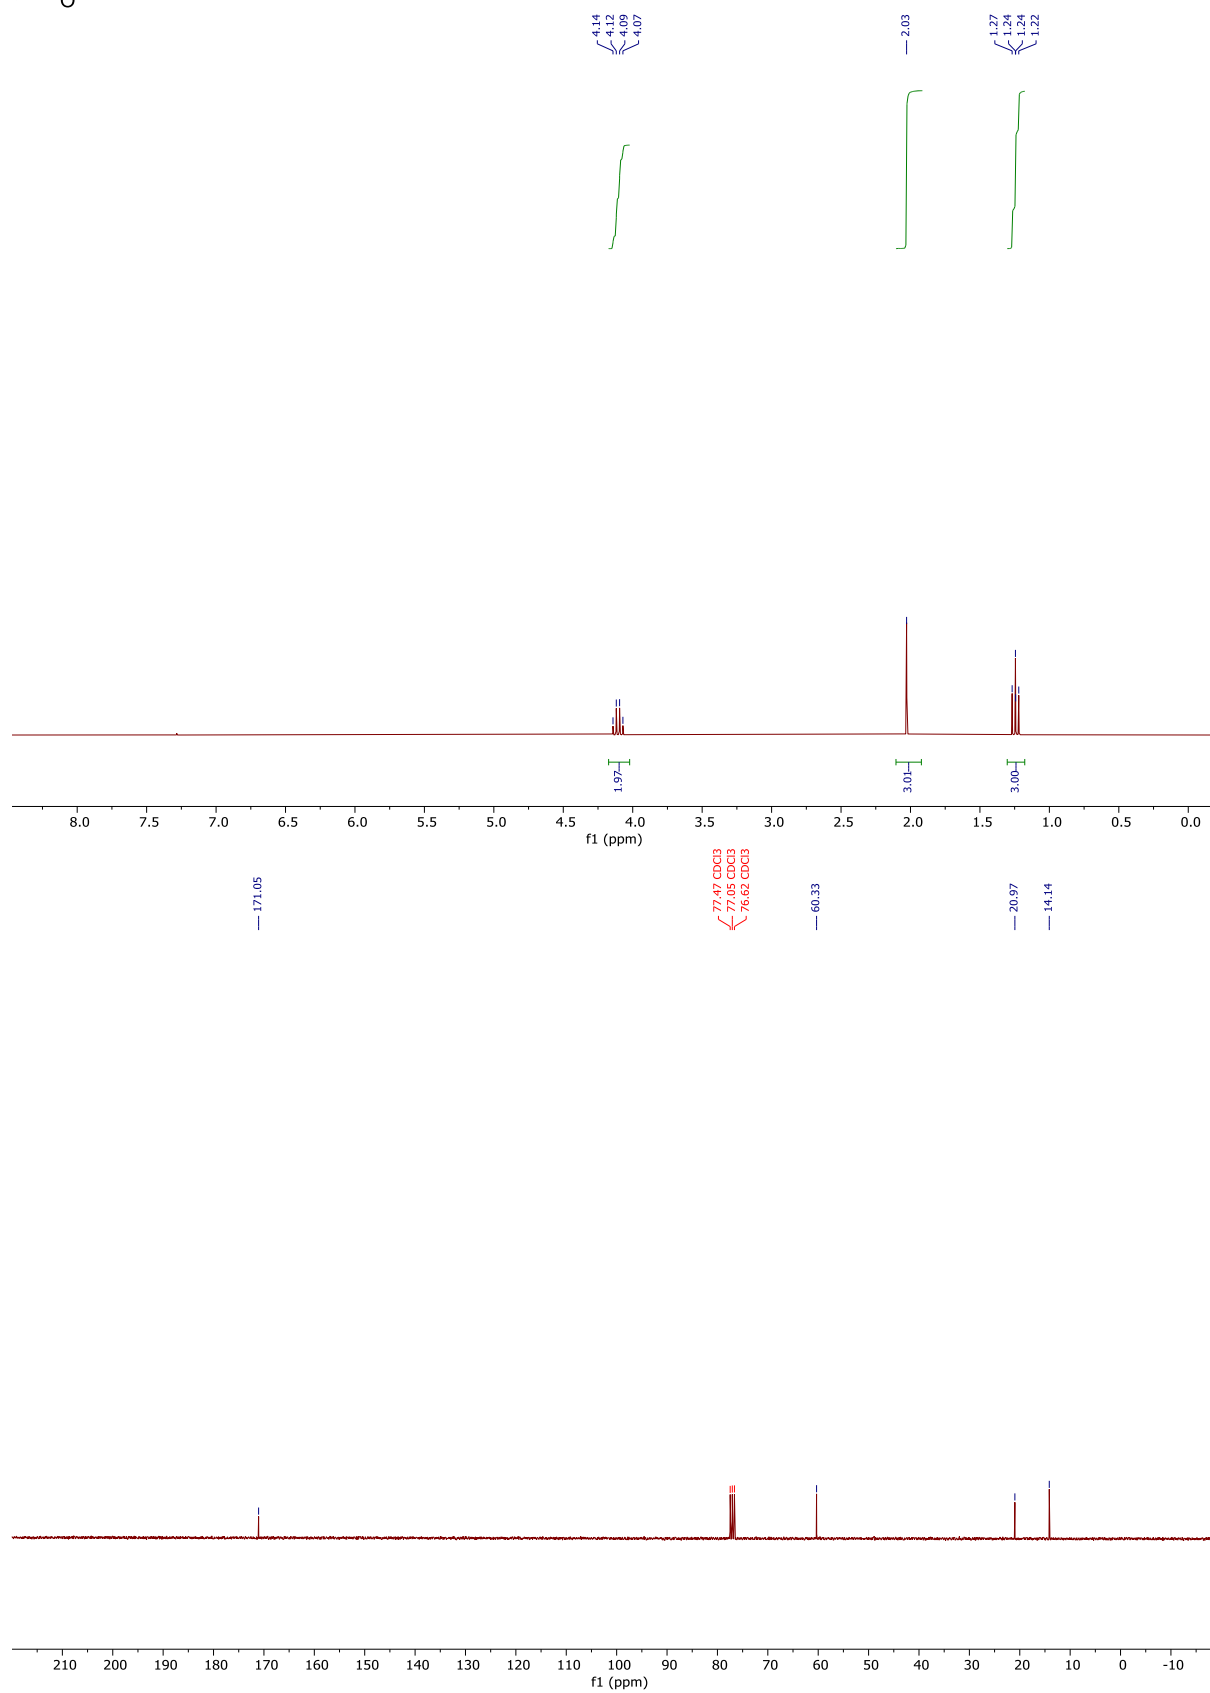

Butyl acetate (60)

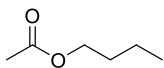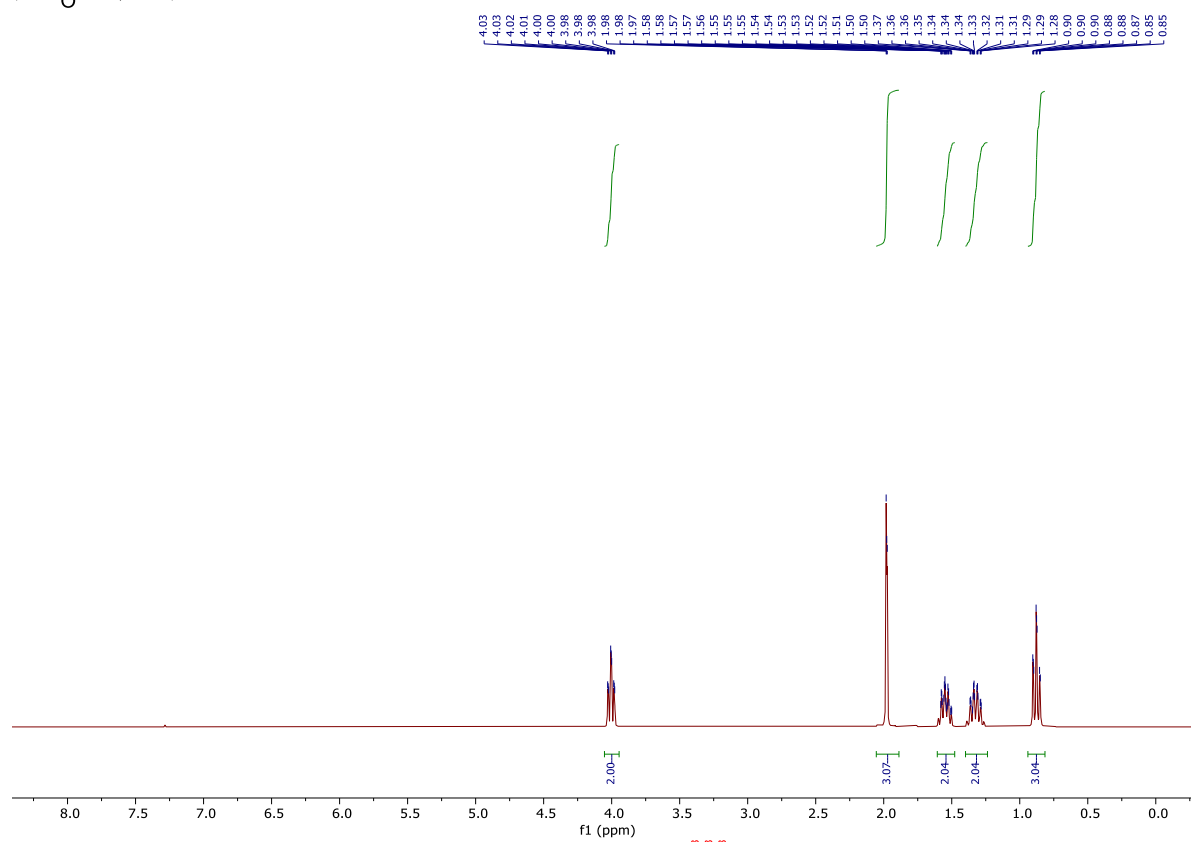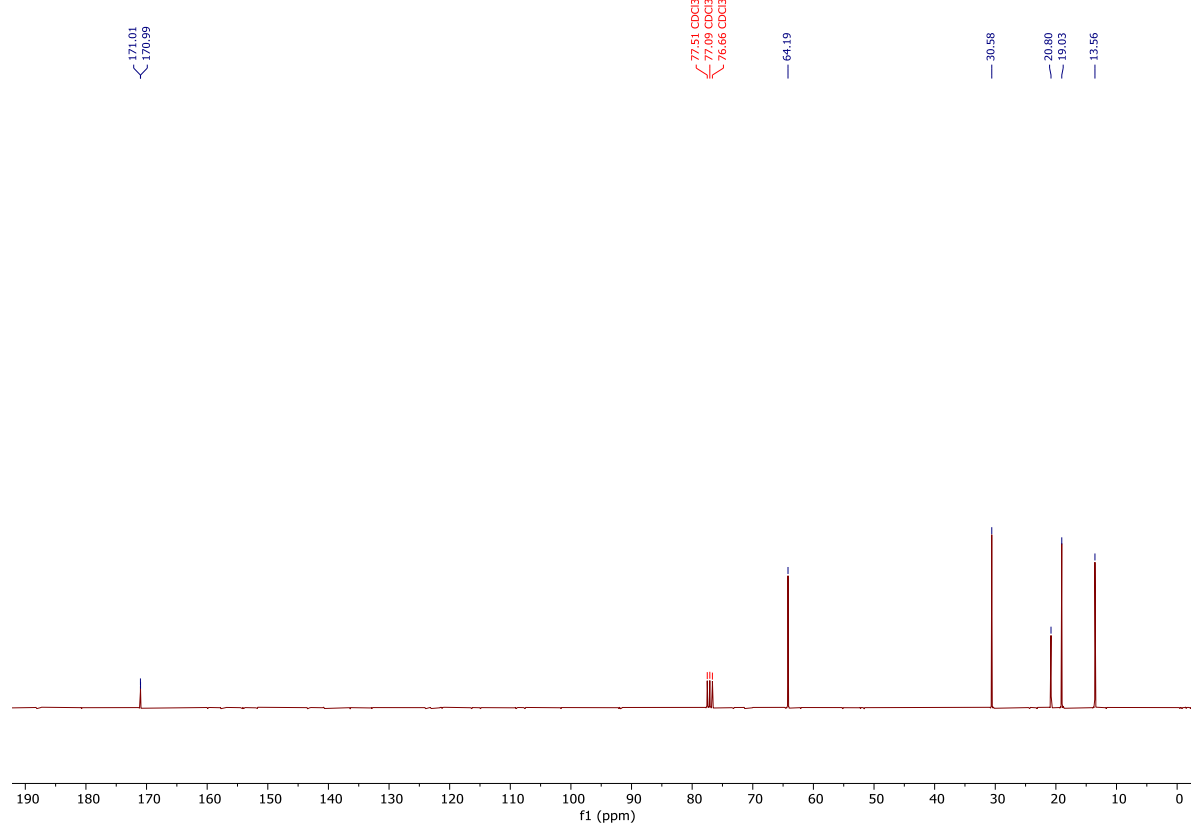

Decyl acetate (61)

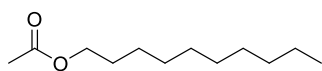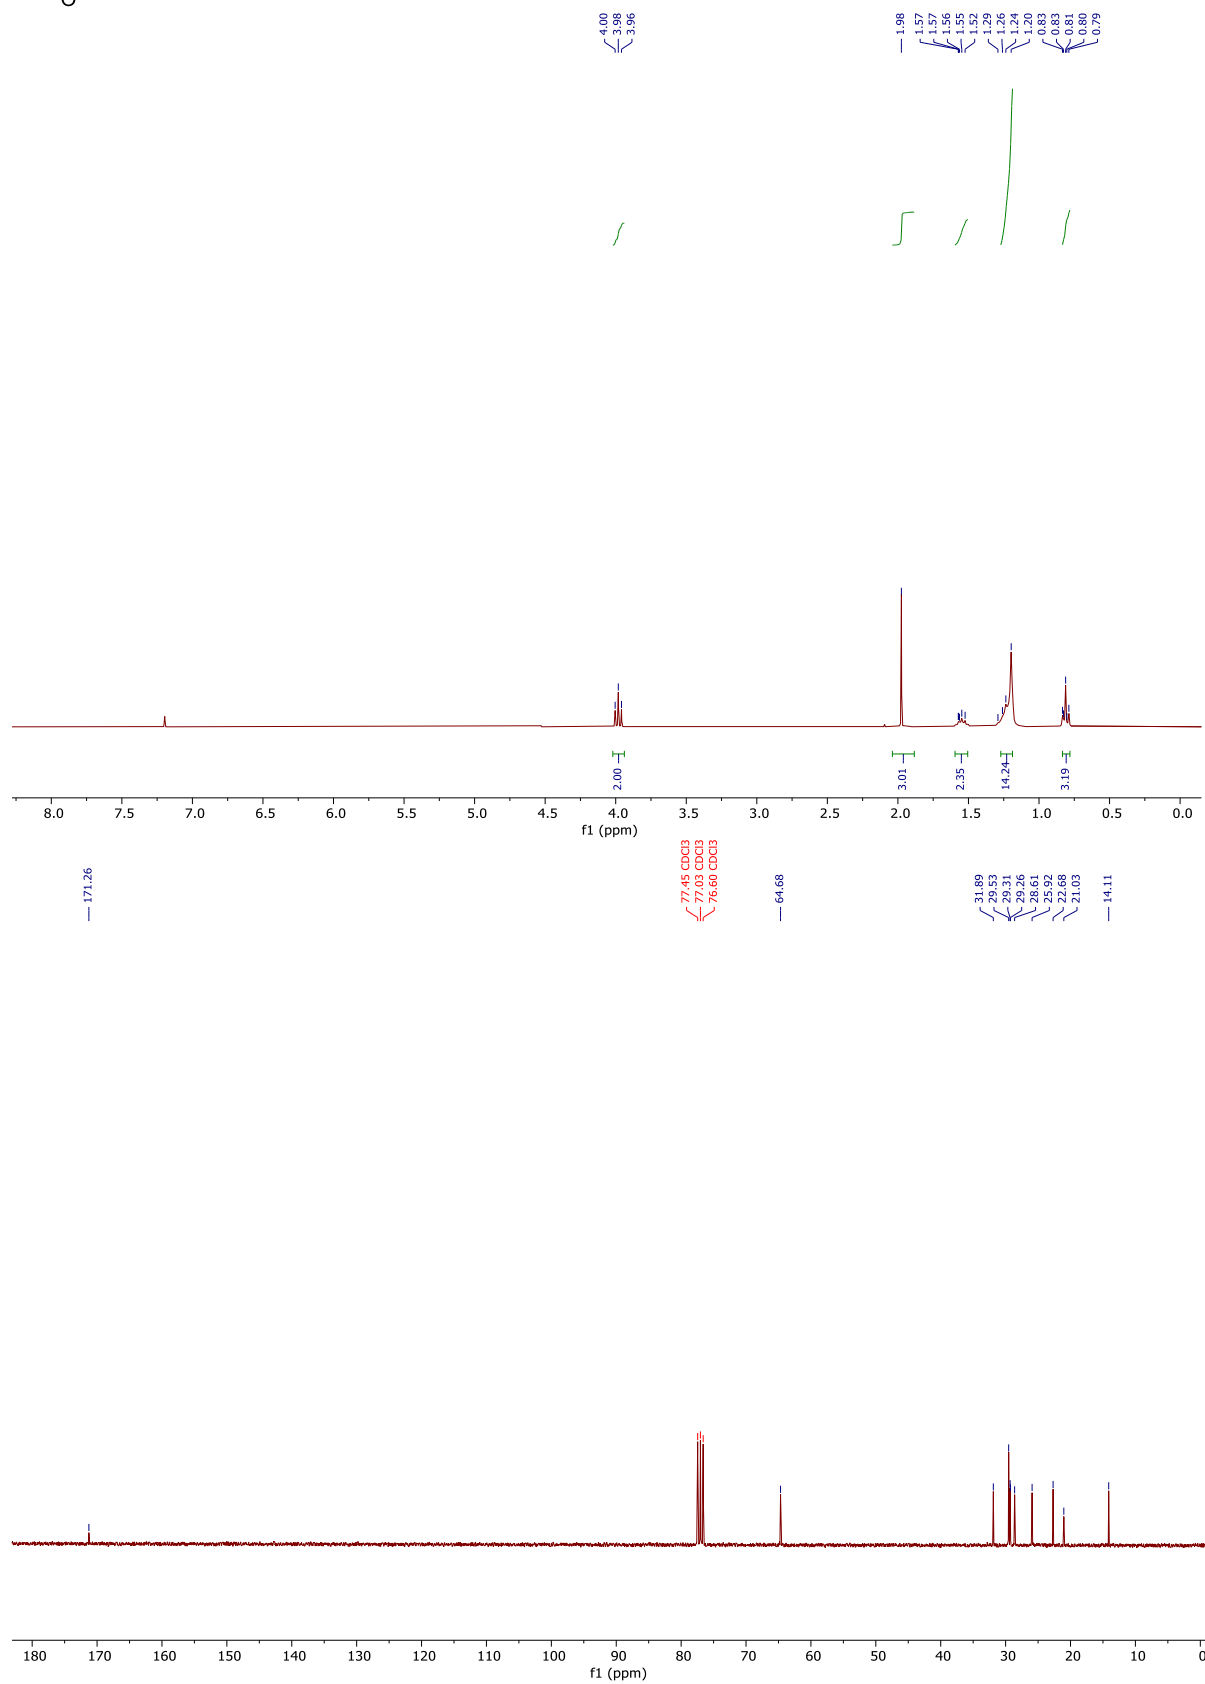

Phenyl acetate (62)

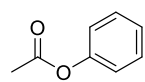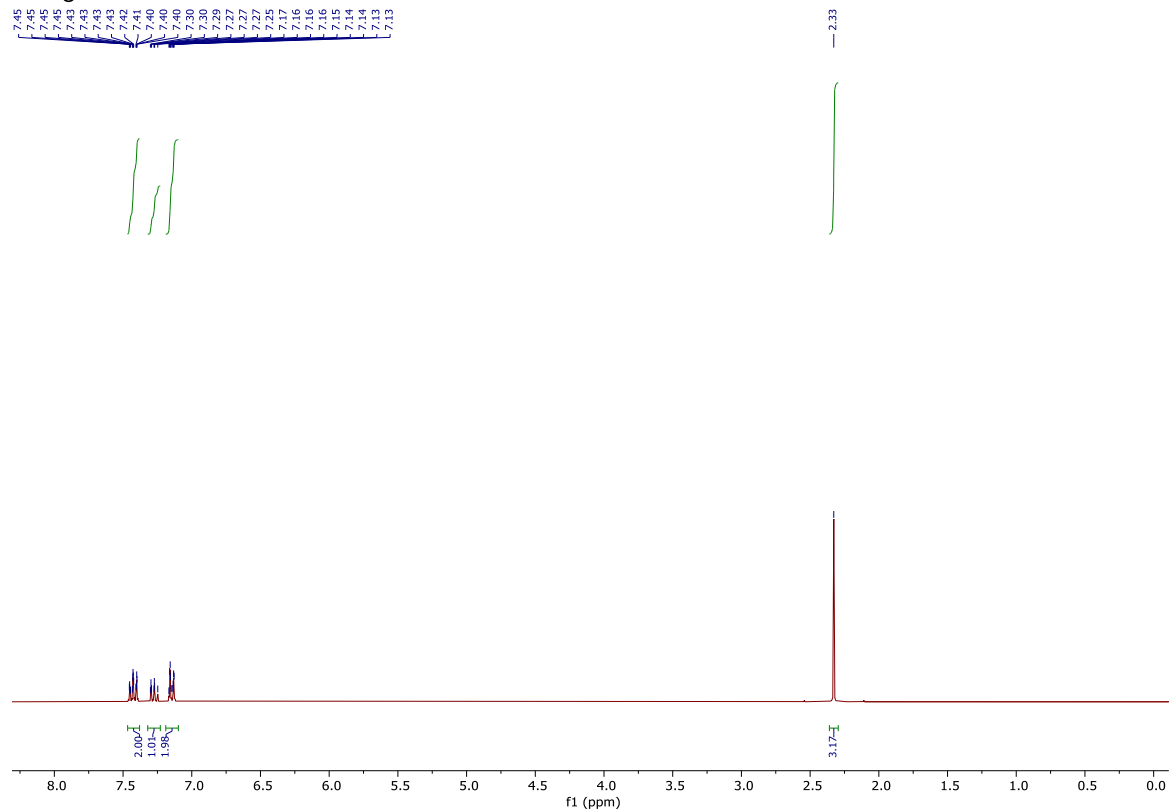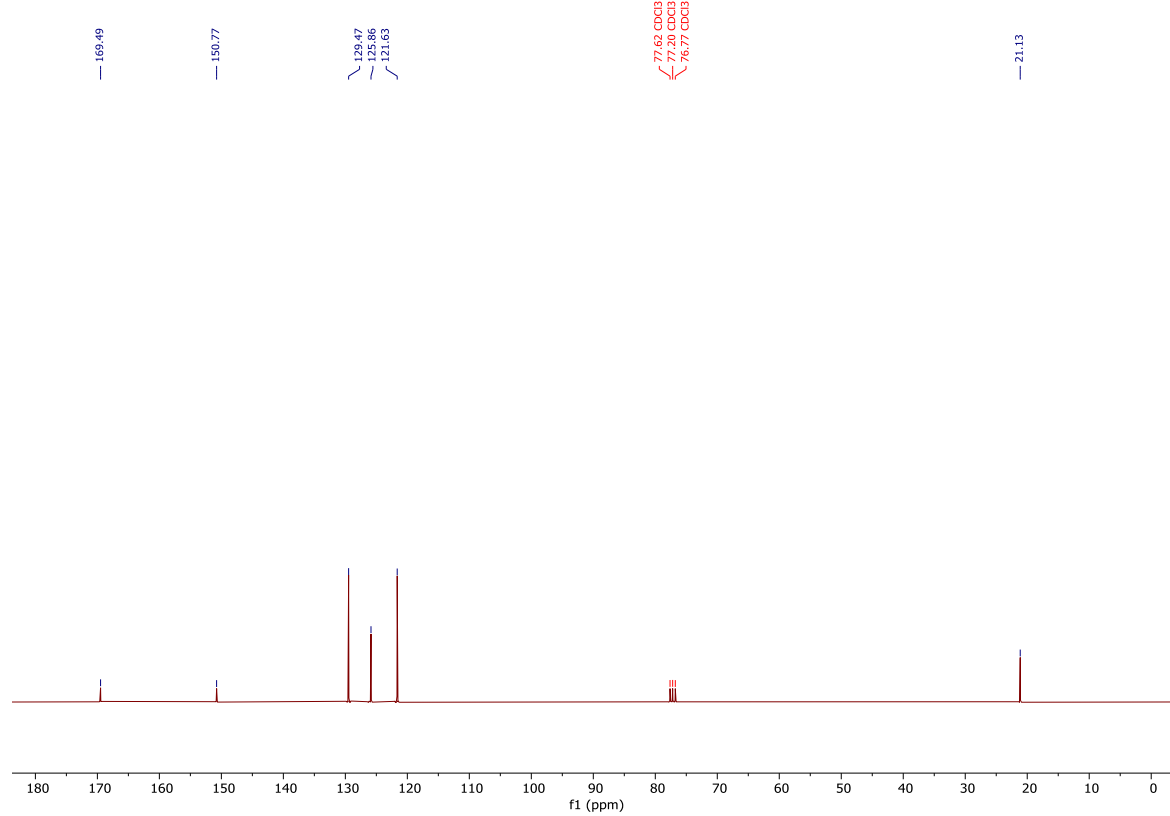

Octyl acetate (**63**)

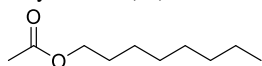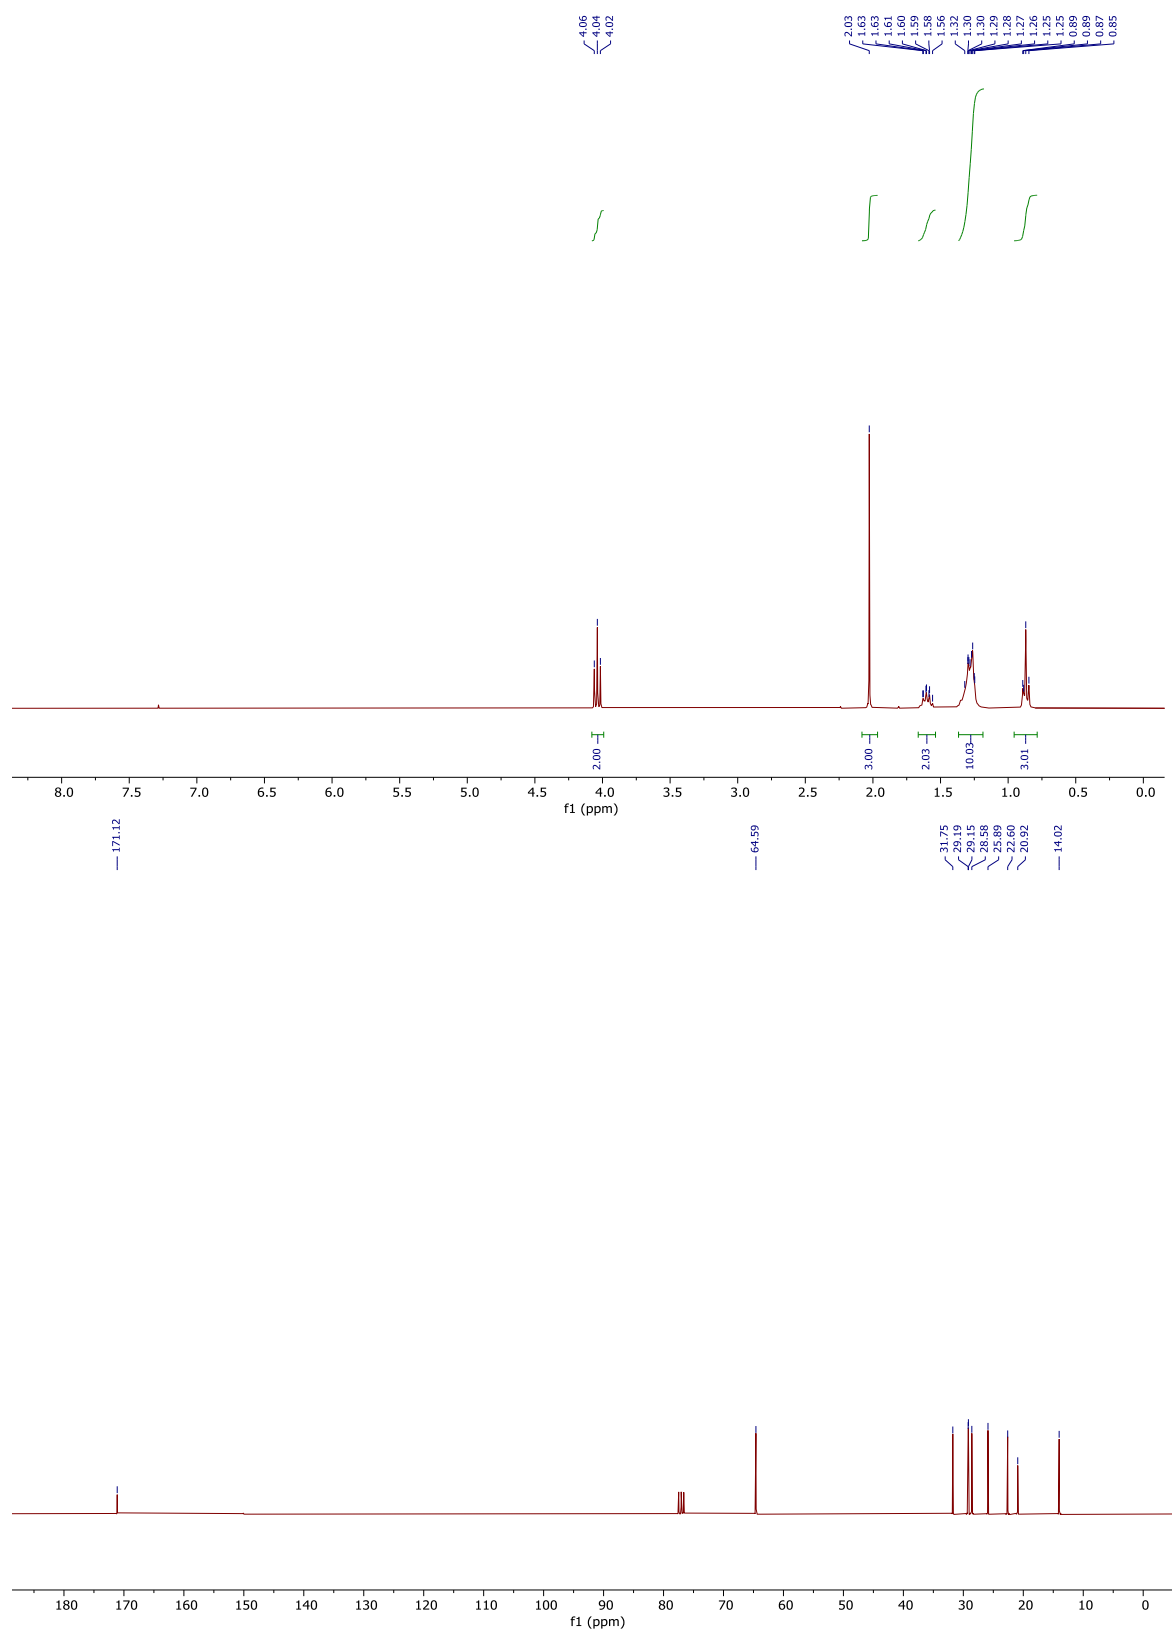

Isopropyl acetate (64)

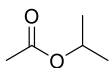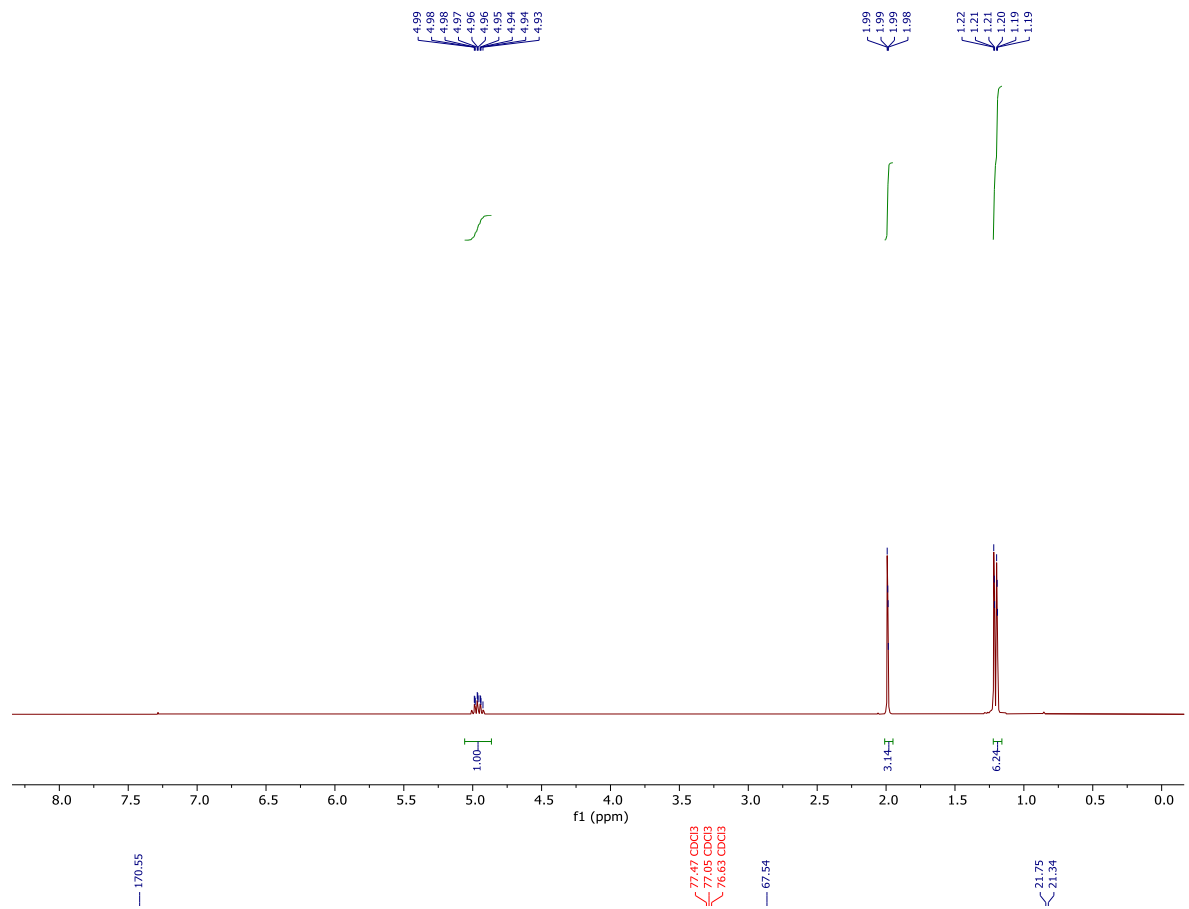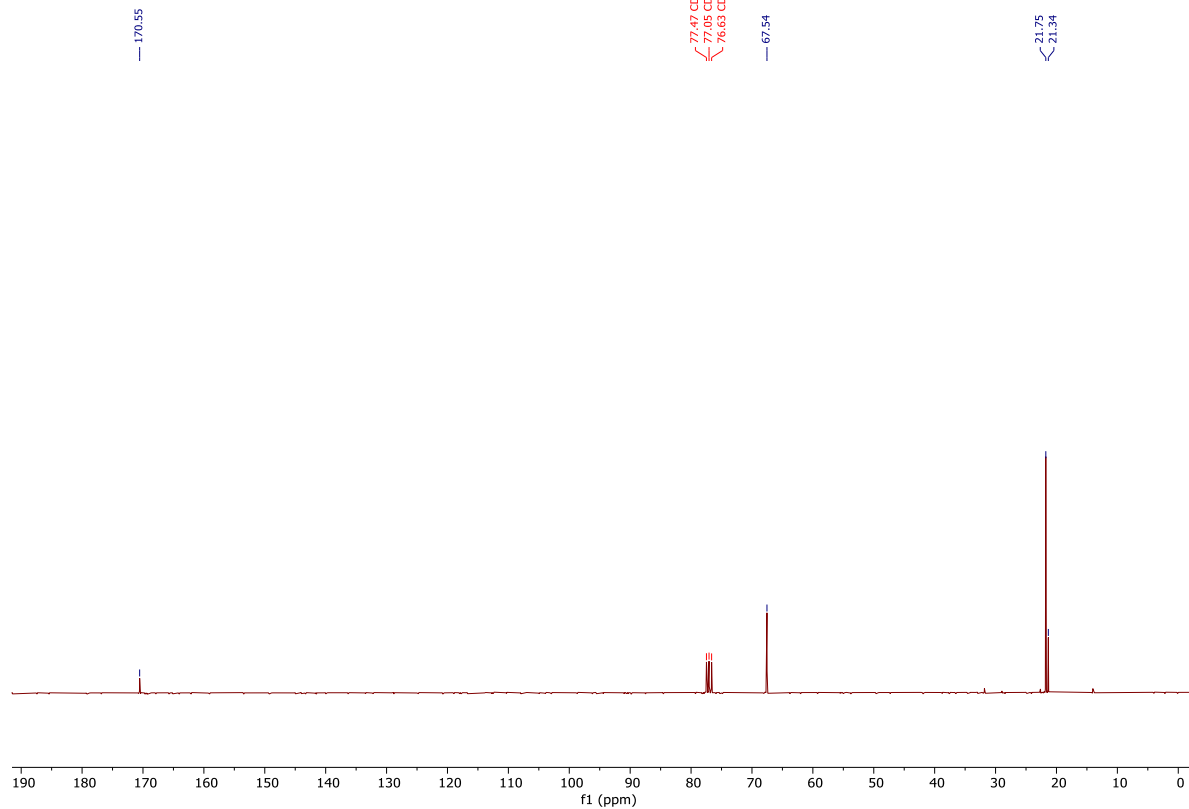

Allyl acetate (65)

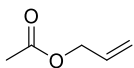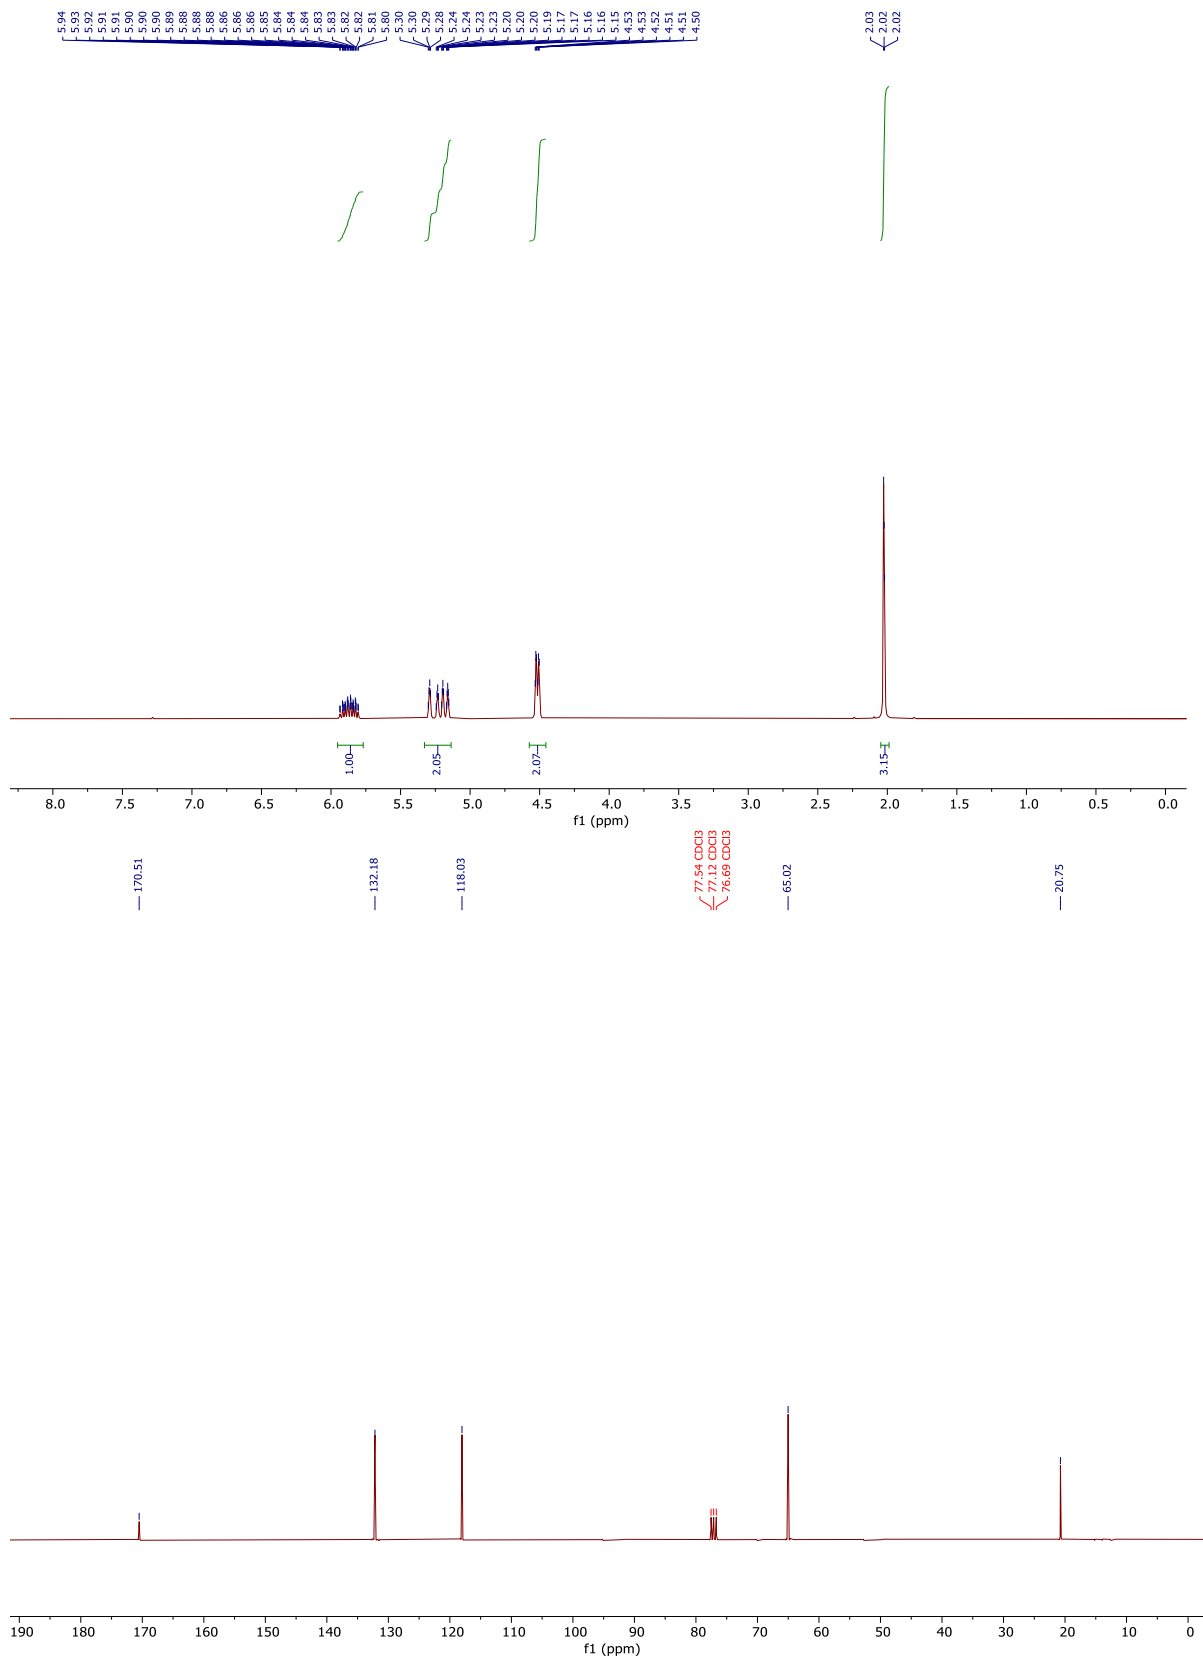

Hex-5-en-1-yl acetate (**66**)

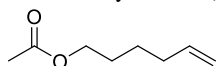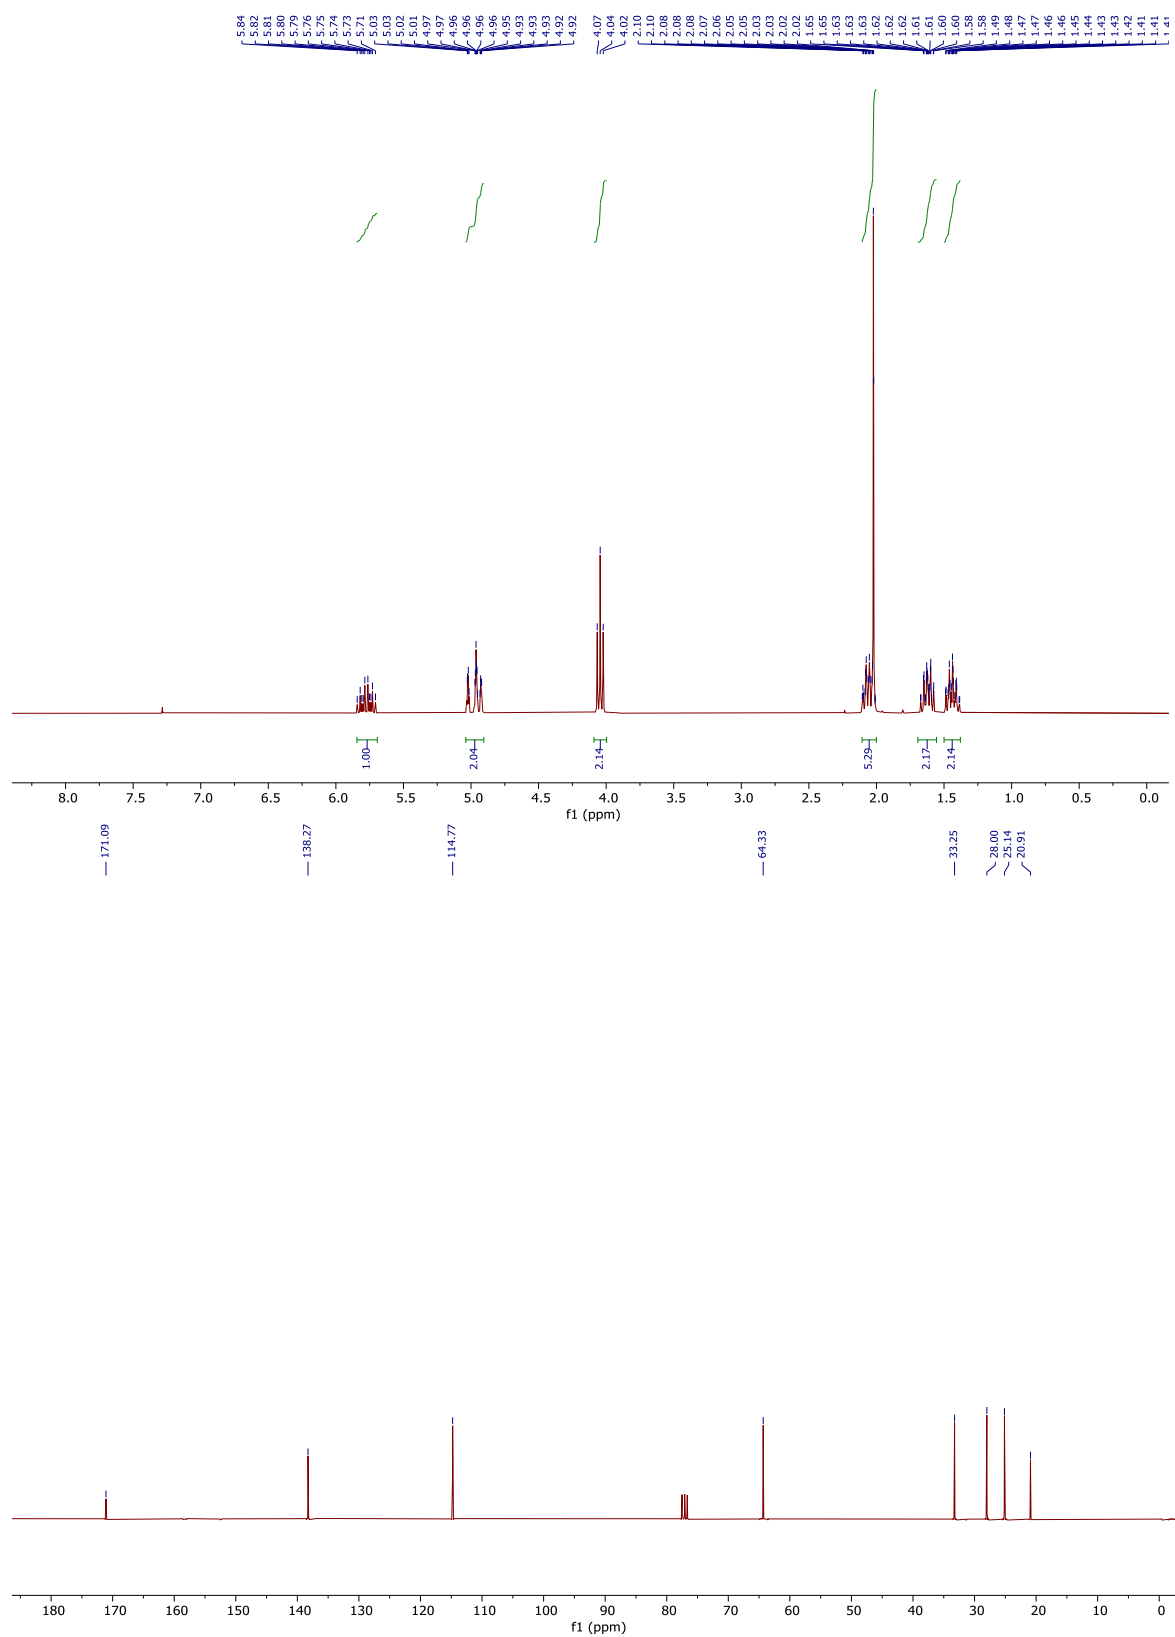



(E)-1,3-Diphenylallyl acetate (**67**)

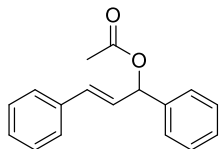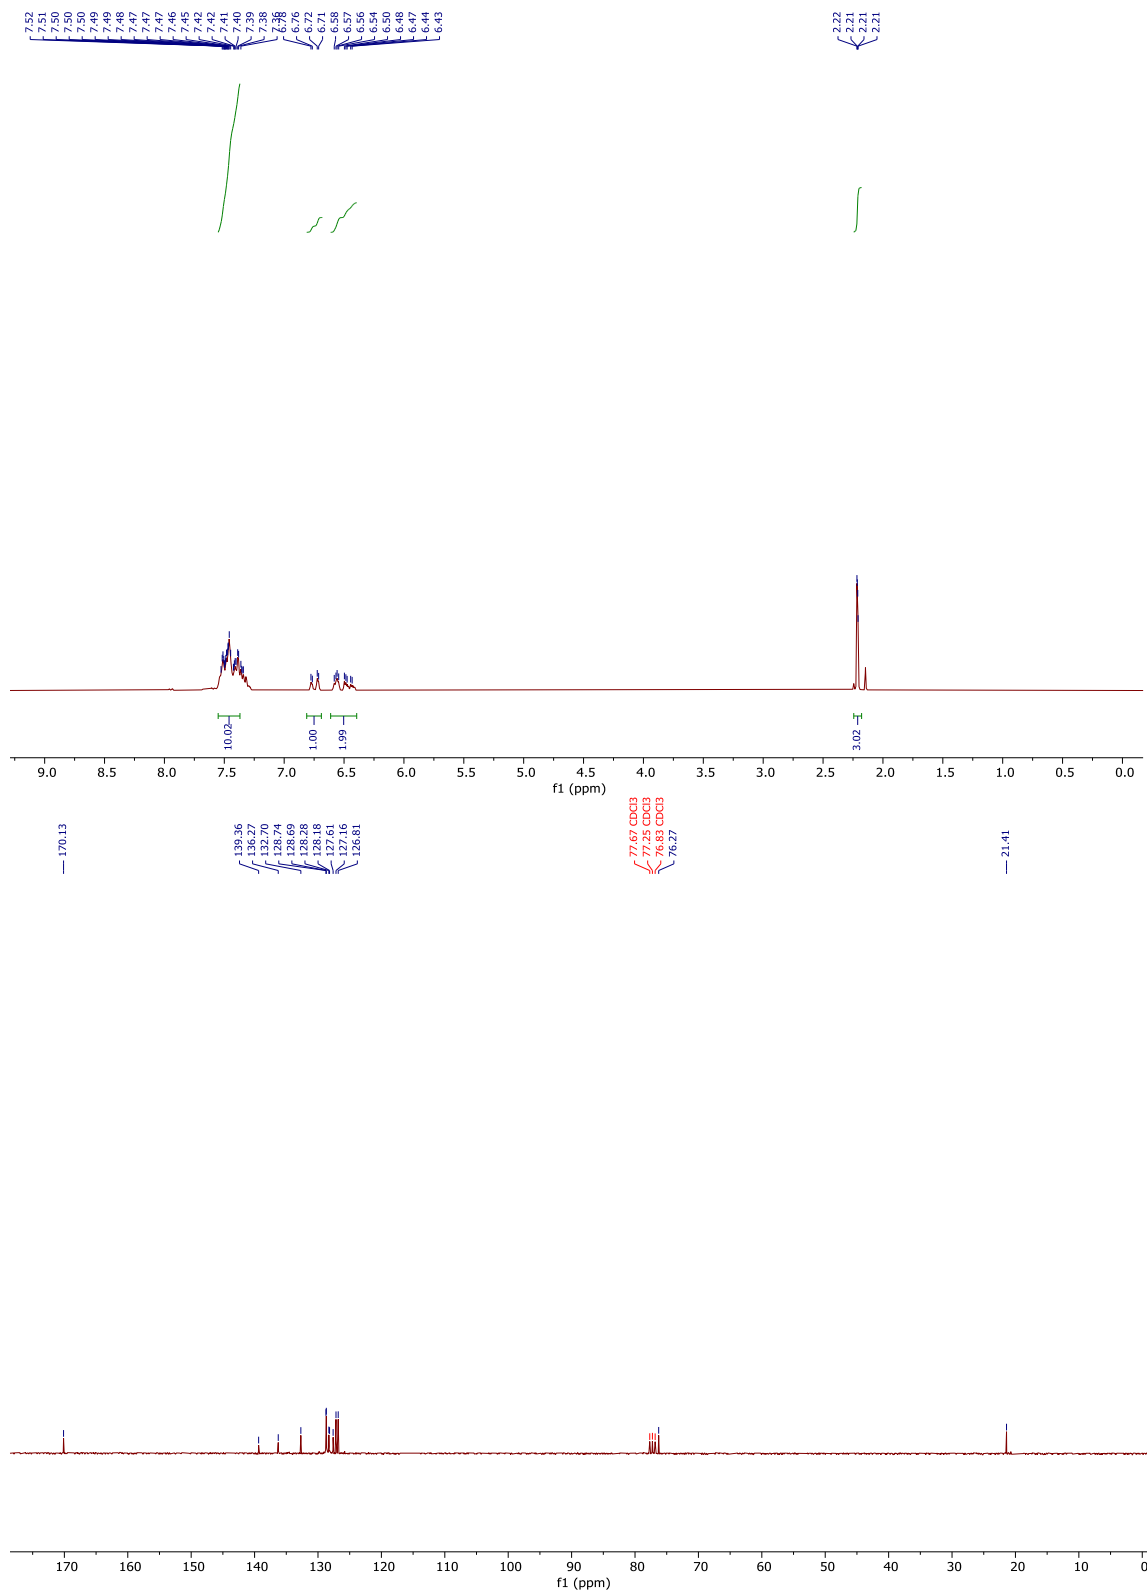

4-Methoxybenzyl acetate (**68**)

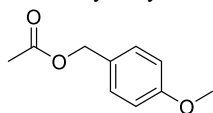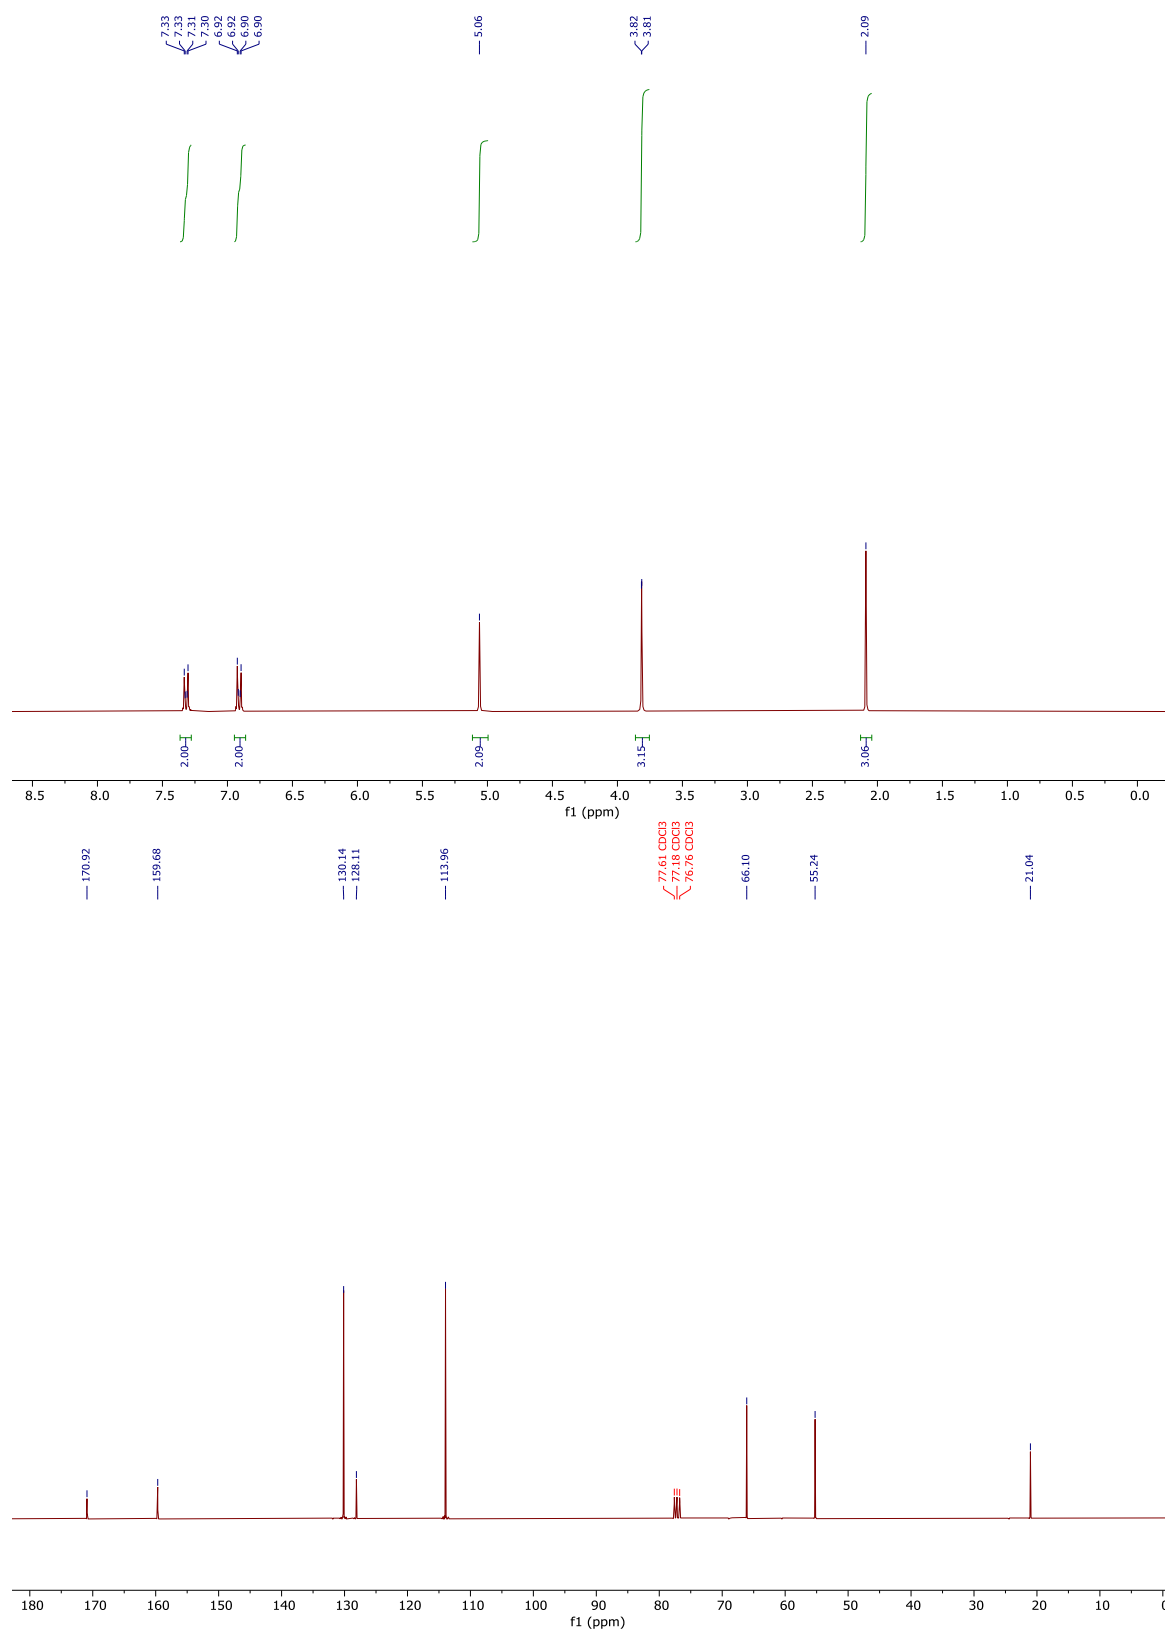

4-Formyl-2-methoxyphenyl acetate (**69**)

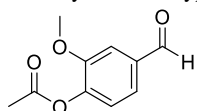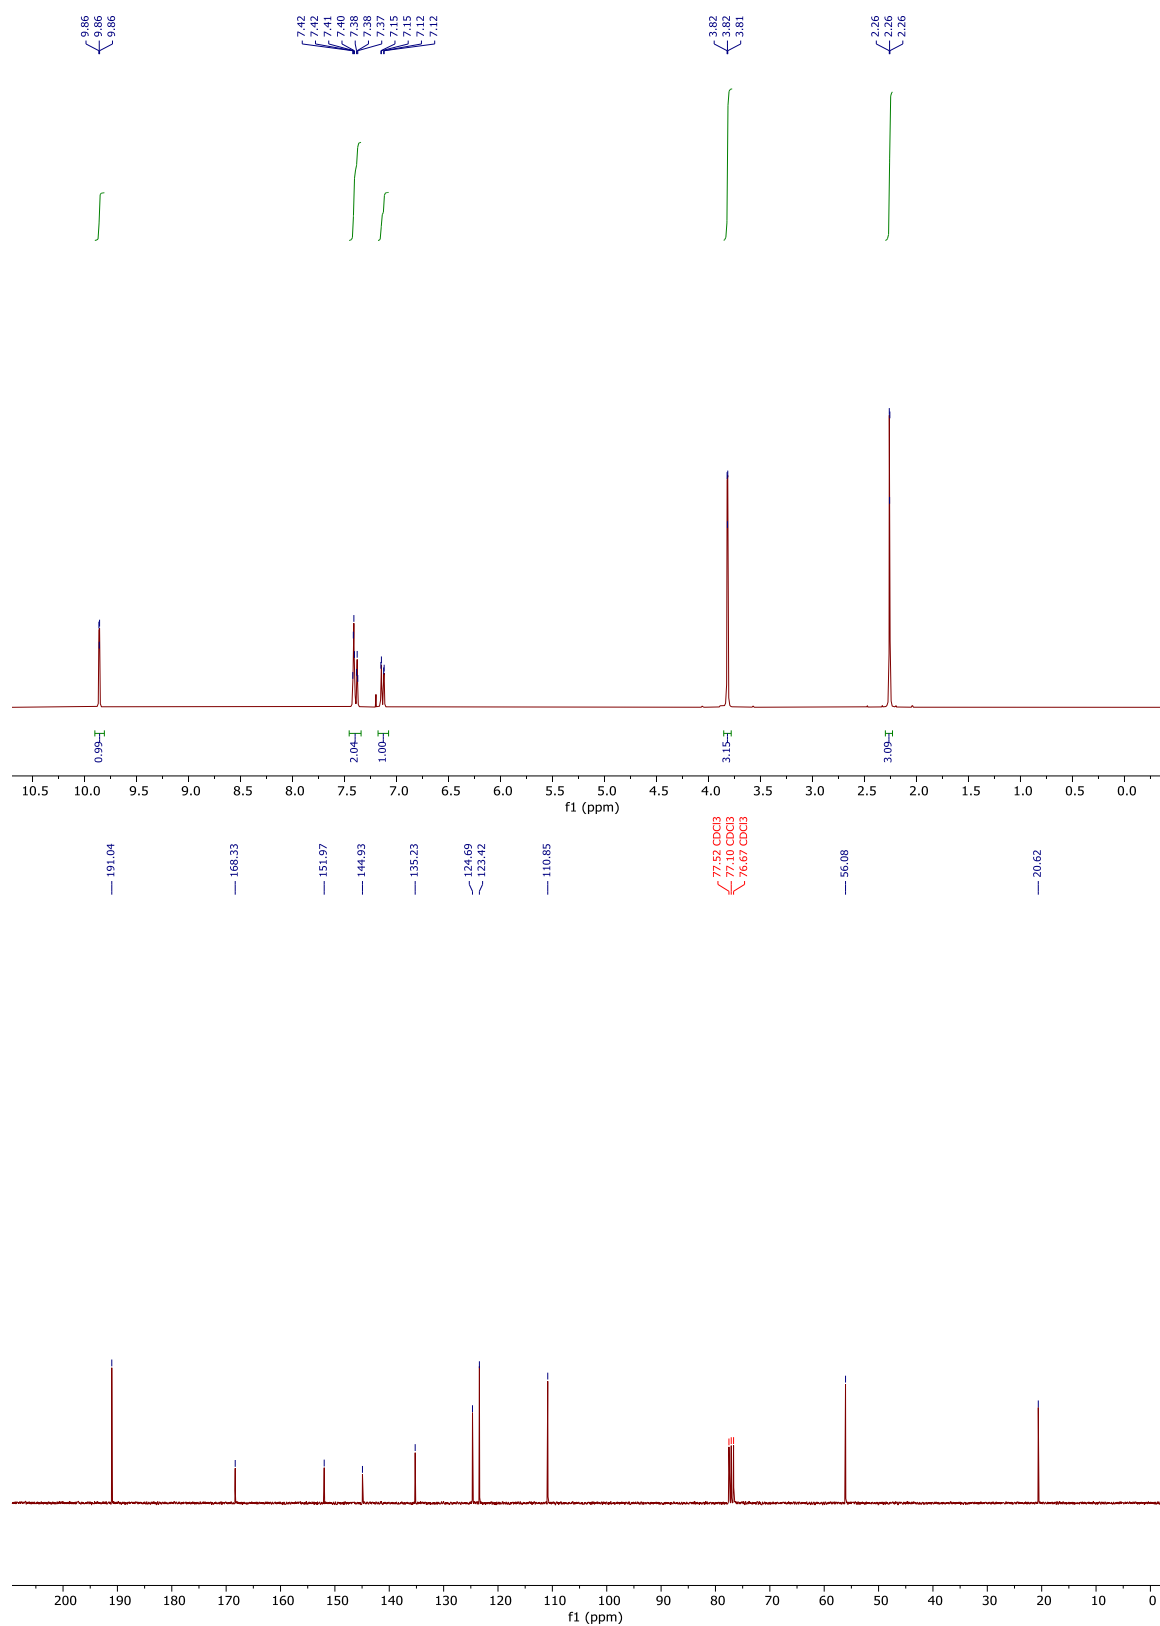

Dimethyl adipate (70)

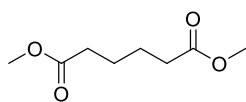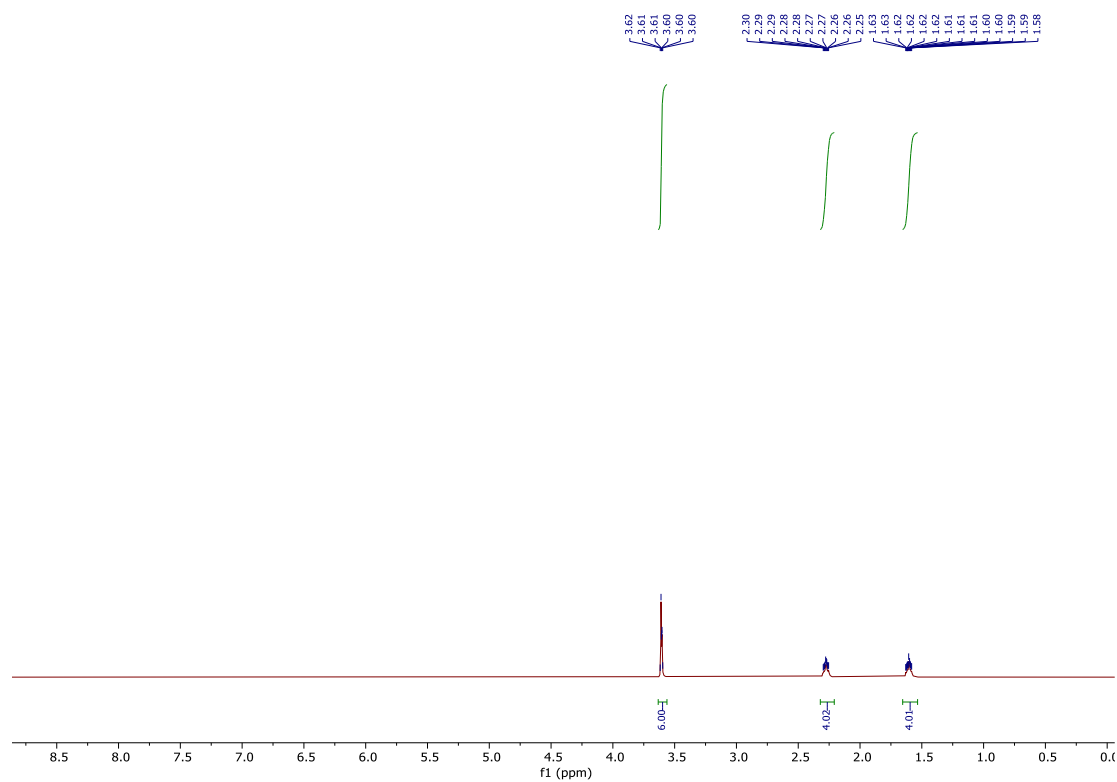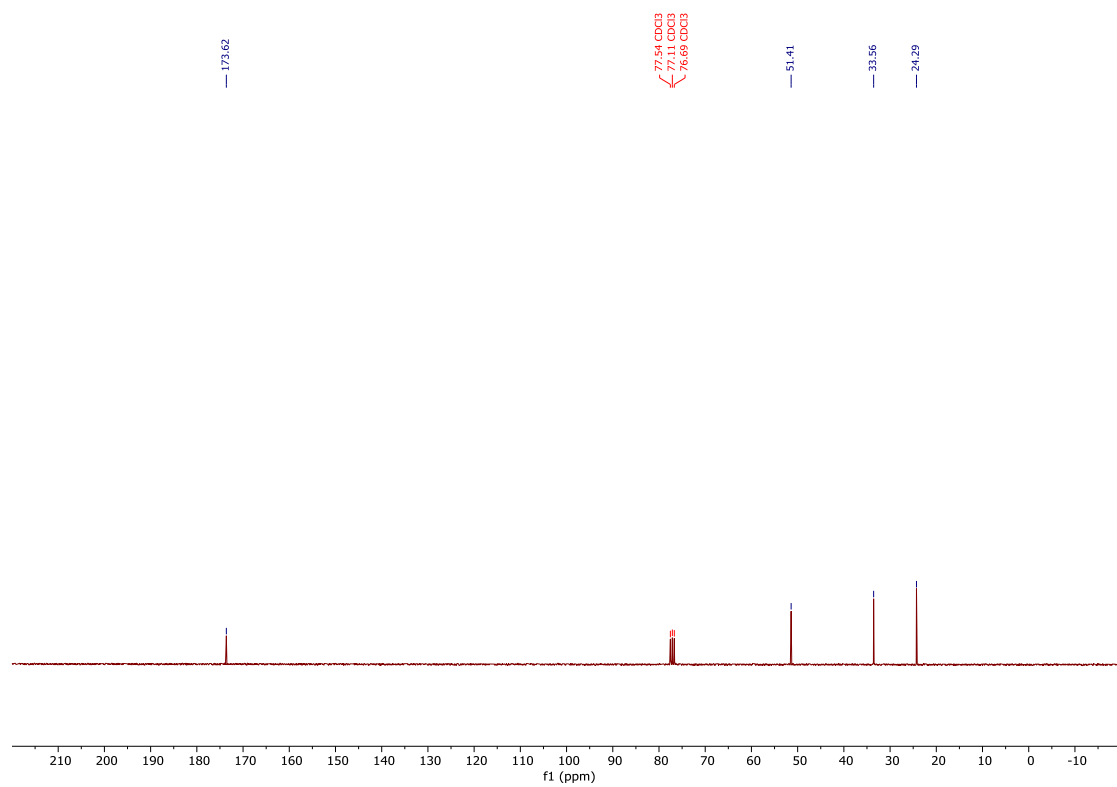

Dibutyl adipate (71)

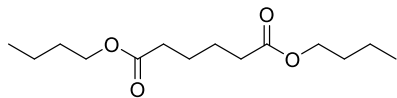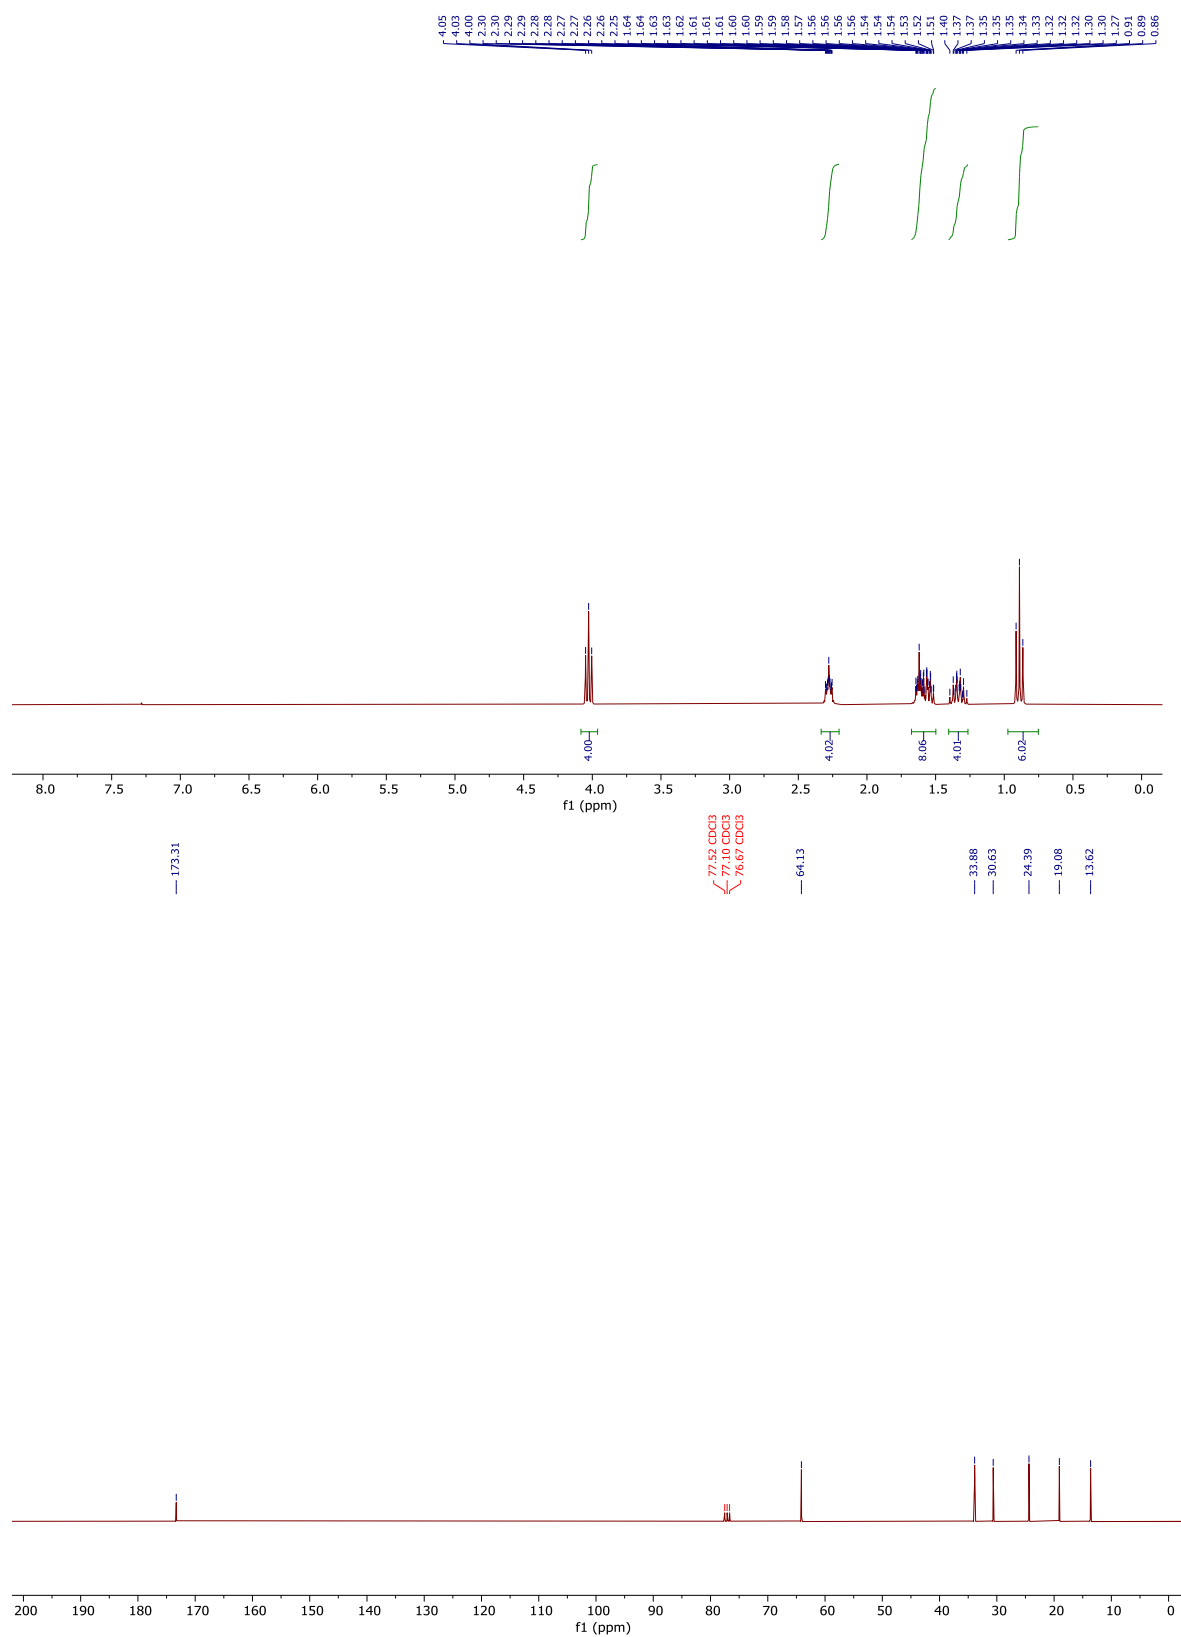

Benzo[d][1,3]dioxol-5-yl 3-phenylpropanoate (72)

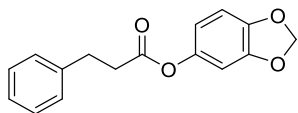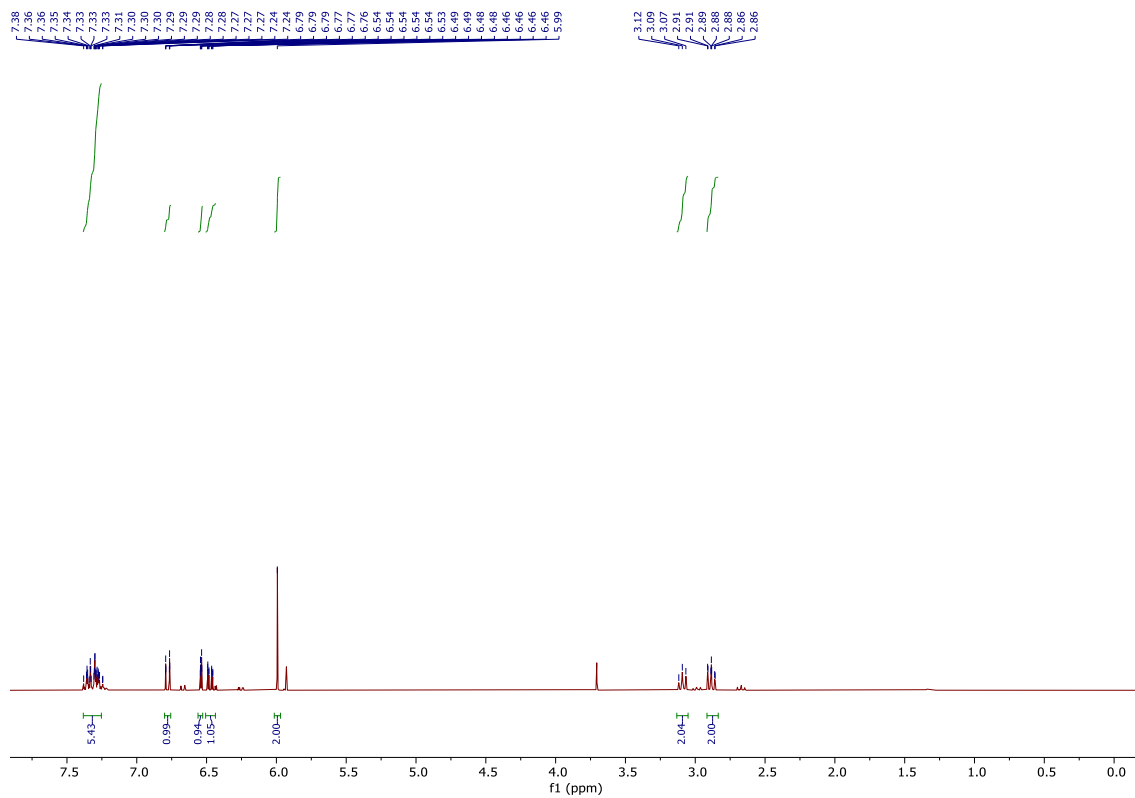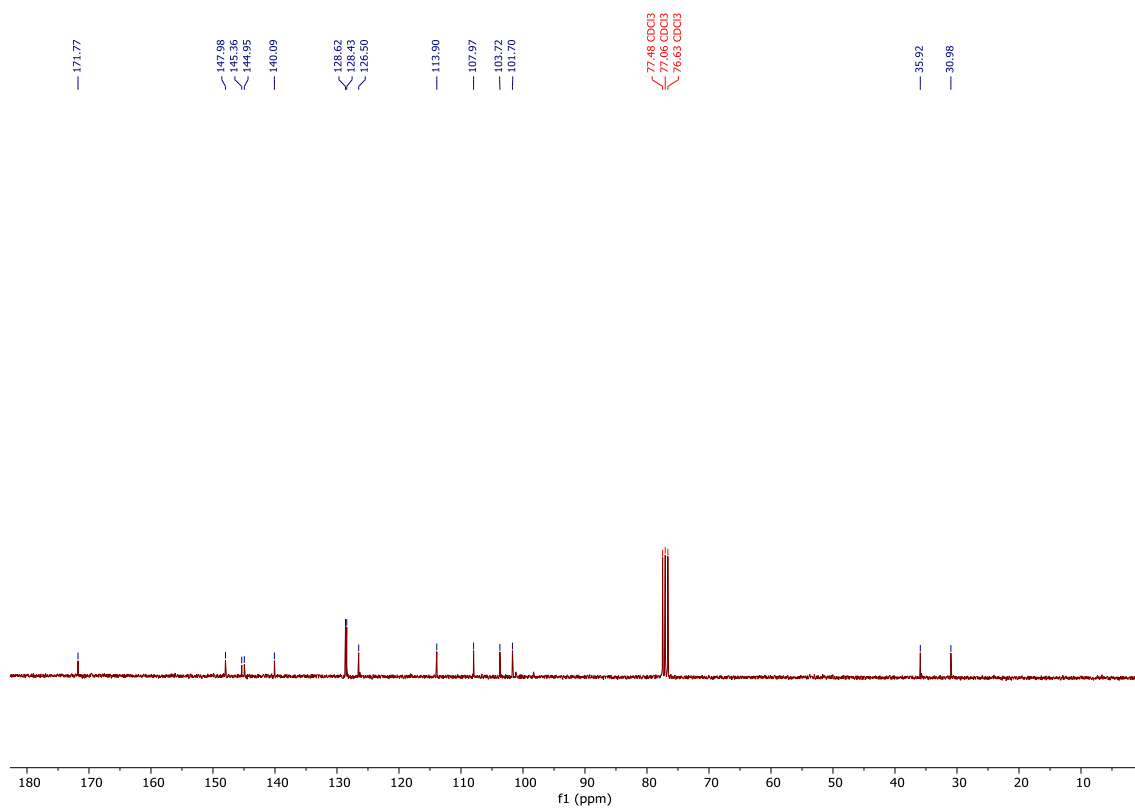

2,5,7,8-Tetramethyl-2-(4,8,12-trimethyltridecyl)chroman-6-yl 3-phenylpropanoate (73)

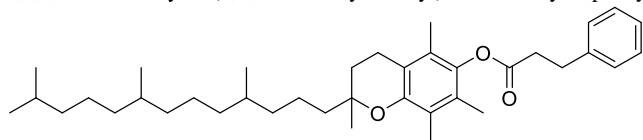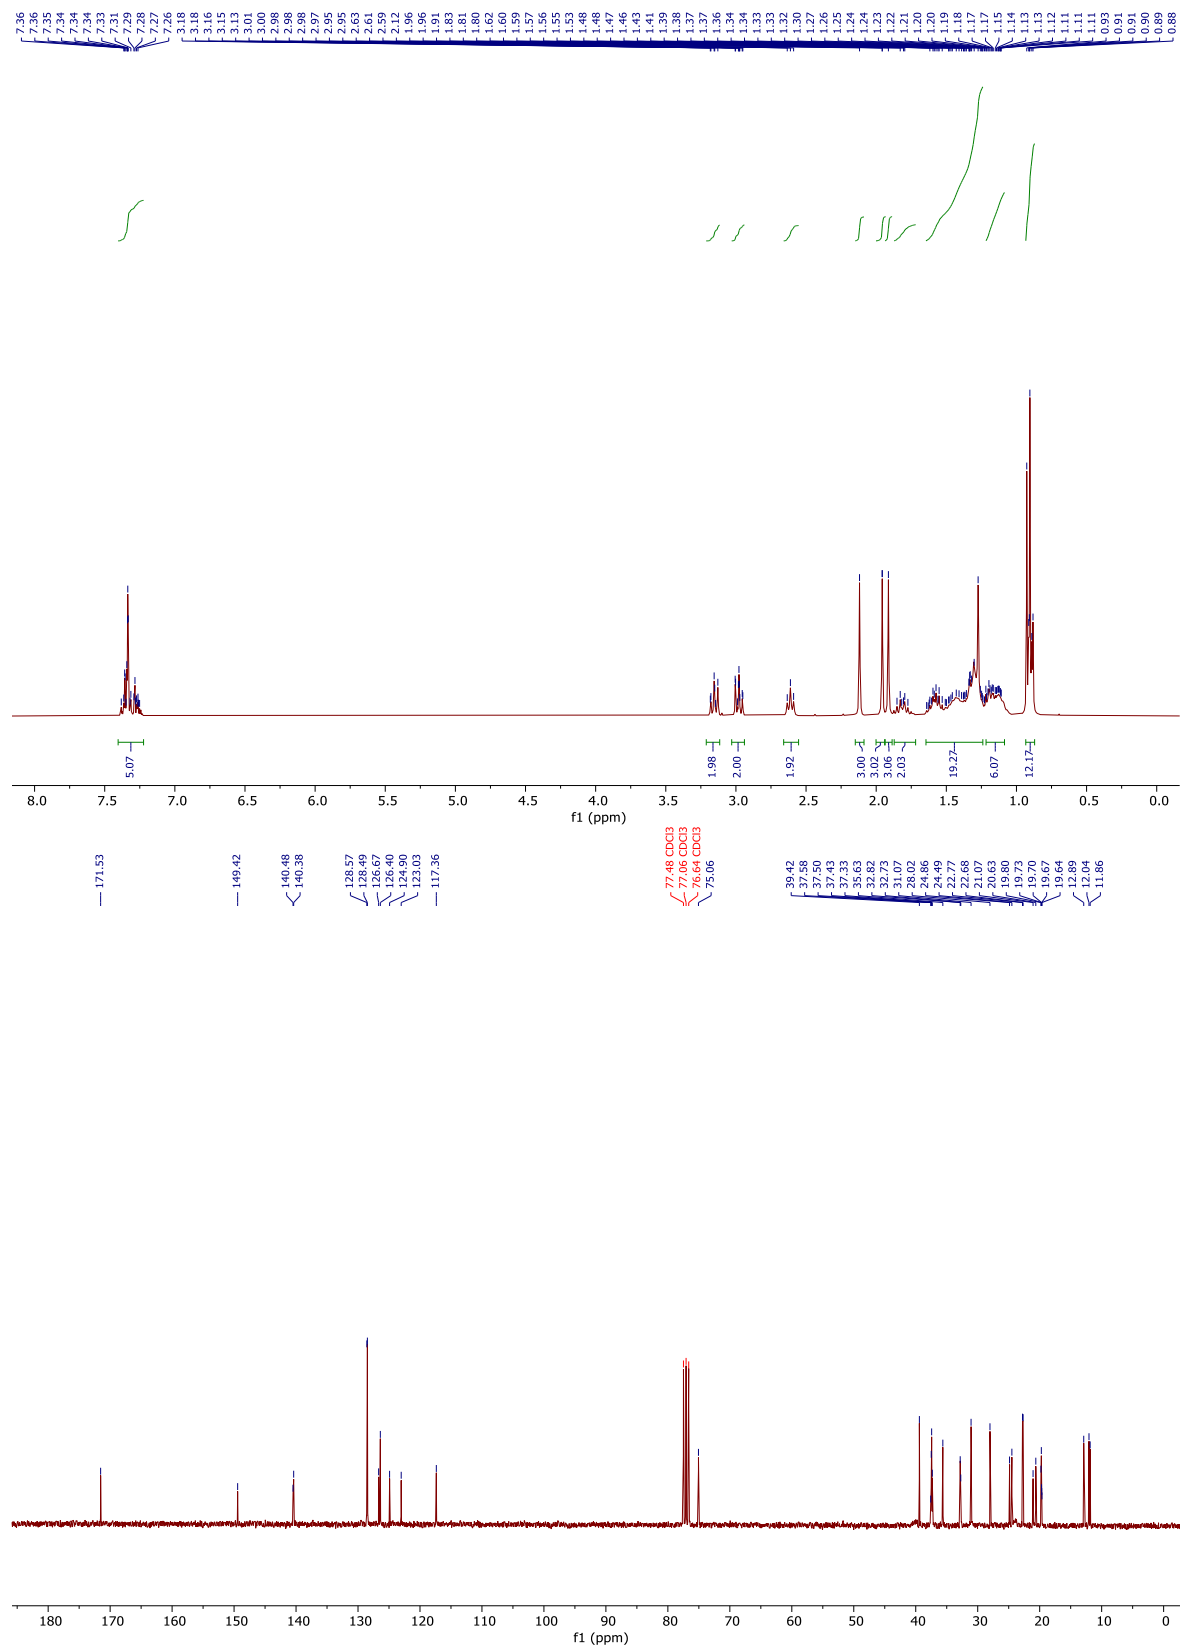

4-((2S,3R)-1-(4-Fluorophenyl)-3-((S)-3-(4-fluorophenyl)-3-hydroxypropyl)-4-oxoazetidin-2-yl)phenyl 3-phenylpropanoate (74)

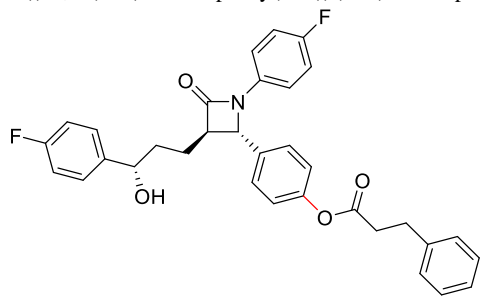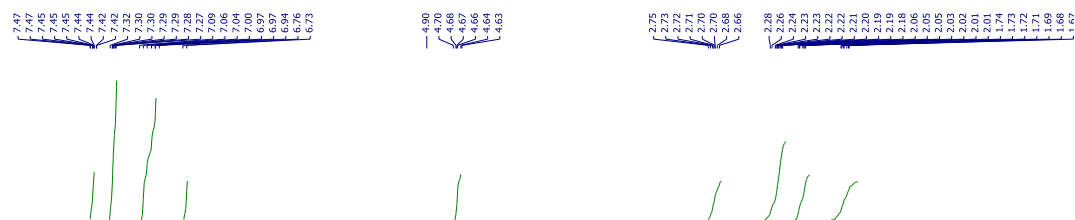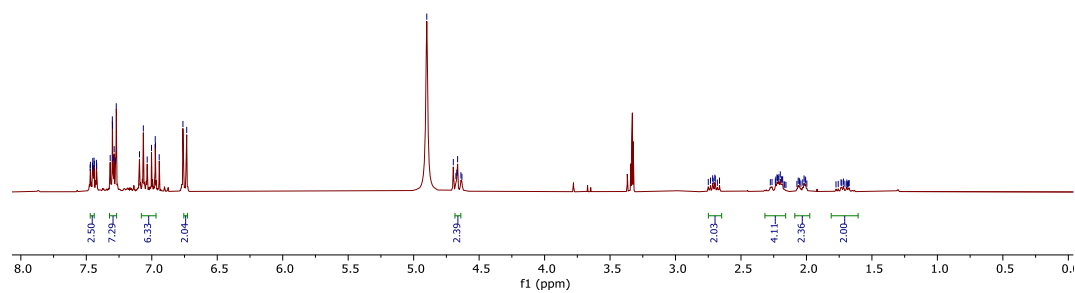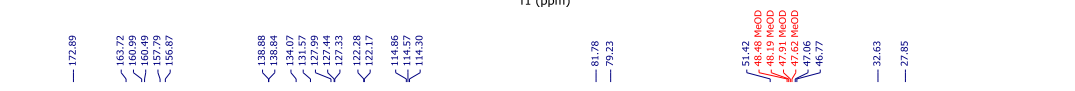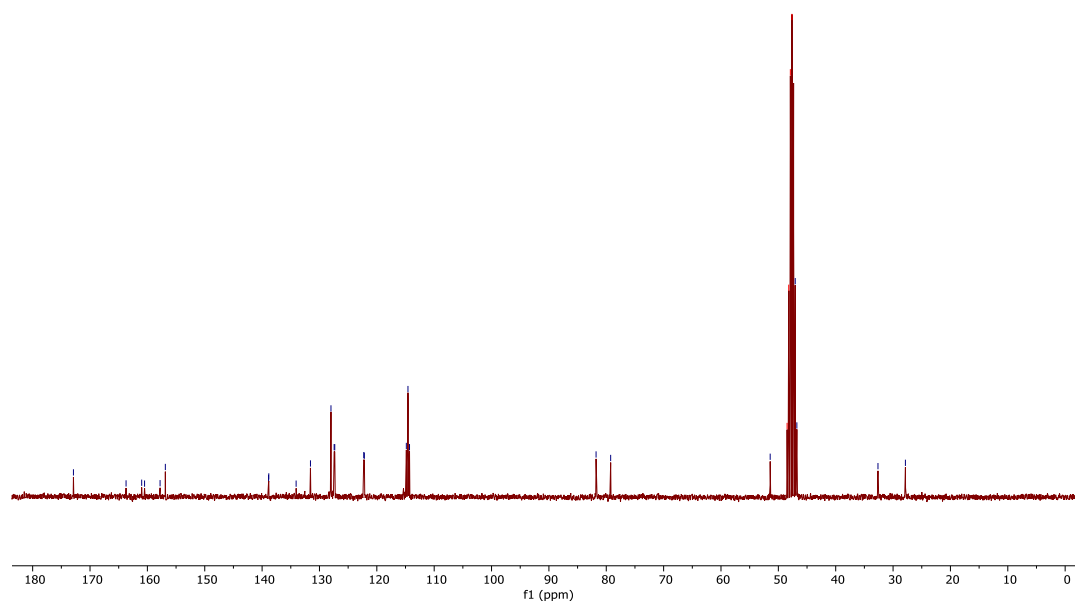



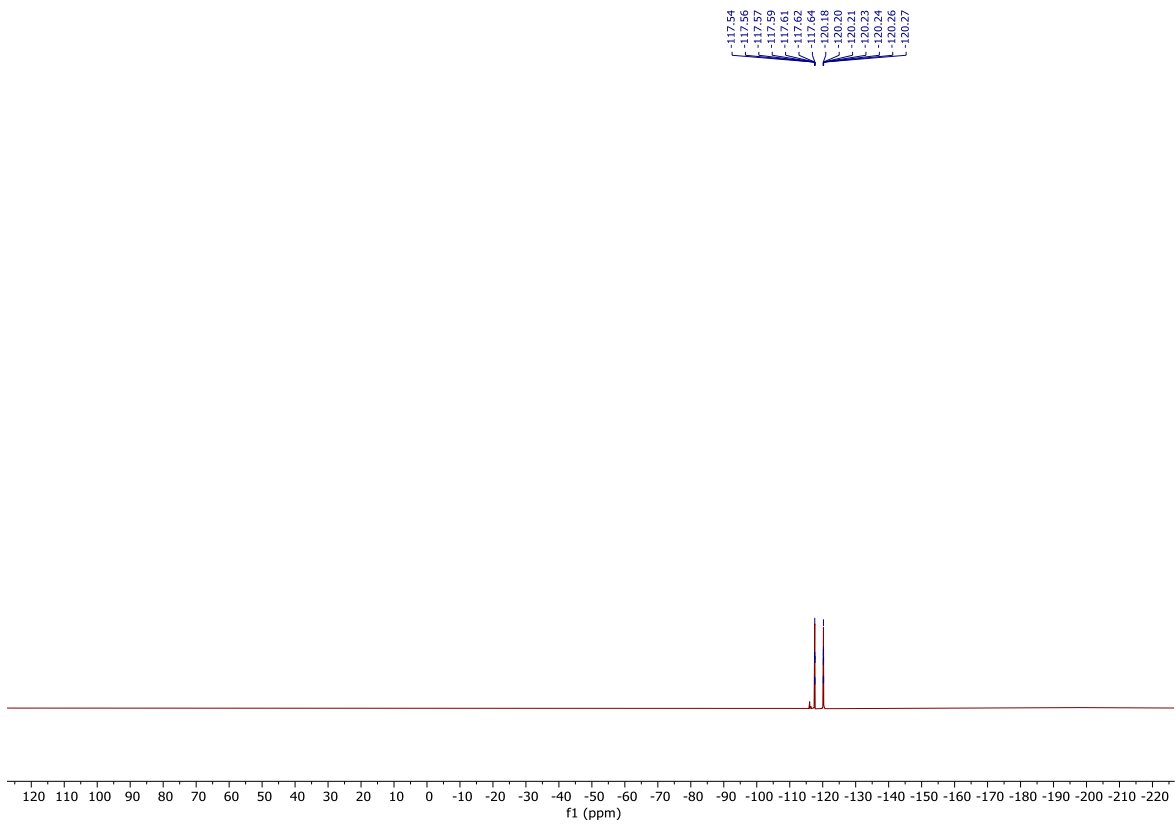

(S)-1-(4-Fluorophenyl)-3-((2S,3R)-1-(4-fluorophenyl)-2-(4-hydroxyphenyl)-4-oxoazetidin-3-yl)propyl 3-phenylpropanoate (75)

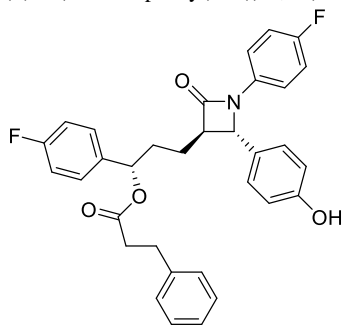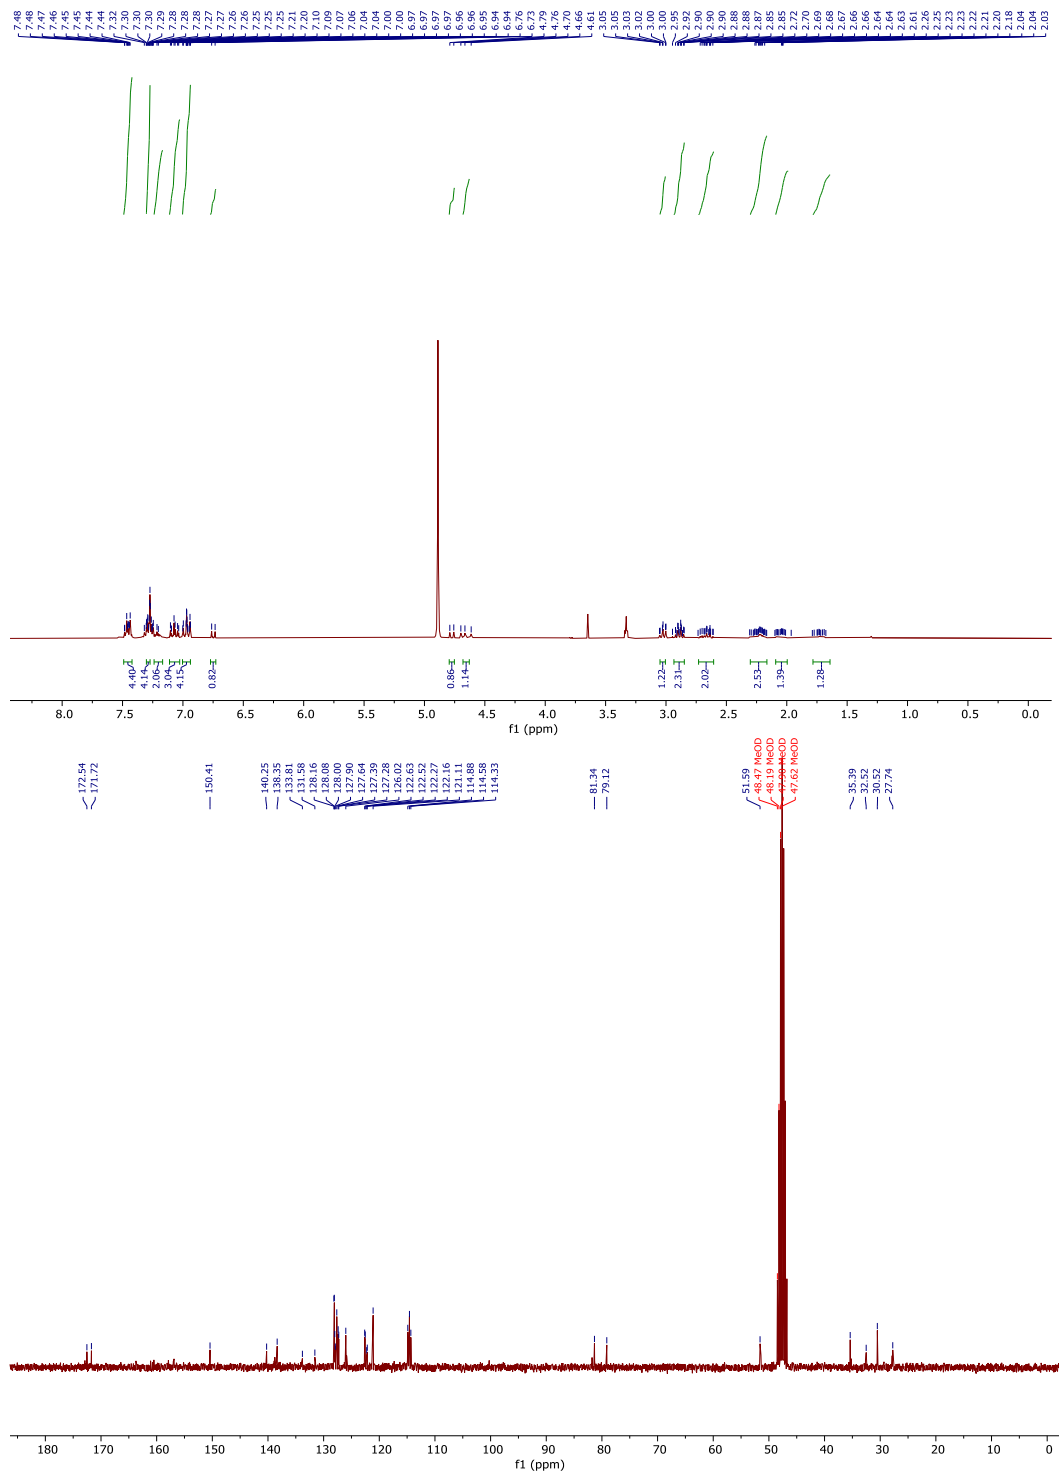

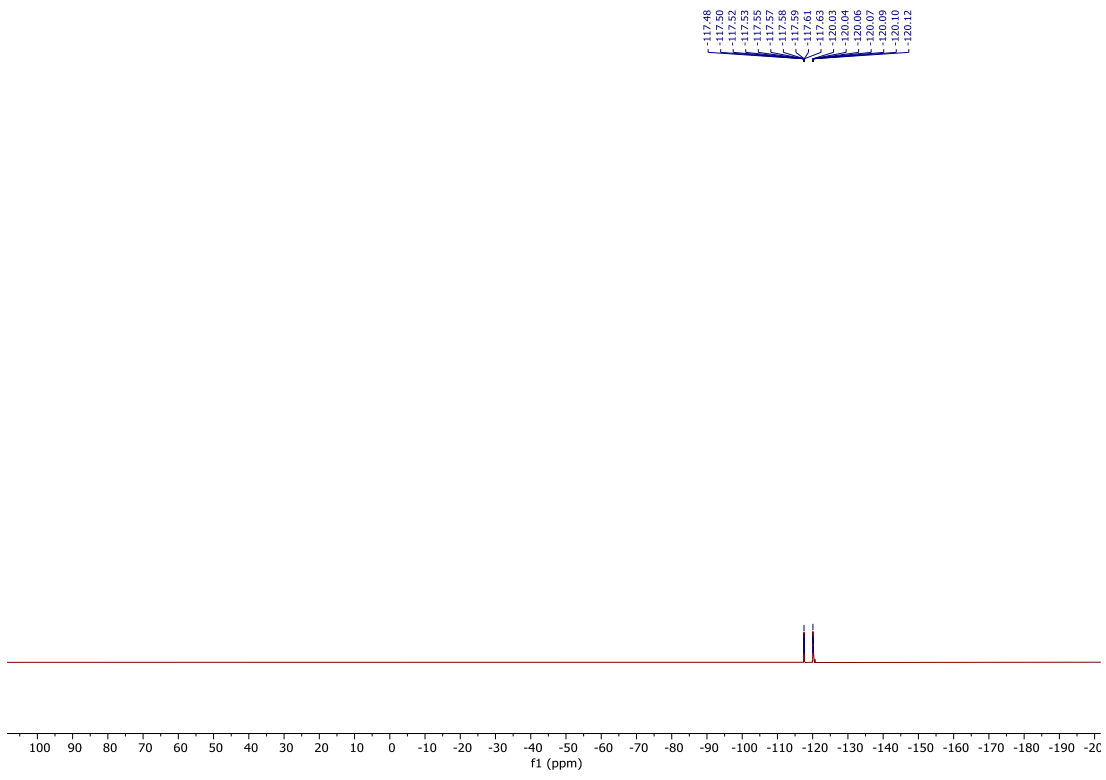

(8R,9S,13S,14S)-13-Methyl-17-oxo-7,8,9,11,12,13,14,15,16,17-decahydro-6H-cyclopenta[a]phenanthren-3-yl 3-phenylpropanoate (76)

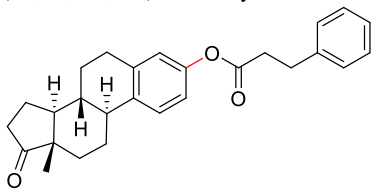

7.35  
7.33  
7.33  
7.33  
7.32  
7.32  
7.31  
7.31  
7.30  
7.30  
7.28  
7.28  
7.26  
6.83  
6.82  
6.80  
6.77  
6.76  
6.75  
3.12  
3.10  
3.10  
3.07  
2.92  
2.92  
2.91  
2.91  
2.90  
2.90  
2.89  
2.87  
2.87  
2.86  
2.85  
2.85  
2.84  
2.41  
2.41  
2.18  
2.14  
2.12  
2.12  
2.11  
2.07  
2.07  
2.06  
2.06  
2.04  
2.04  
2.00  
2.00  
1.99  
1.98  
1.97  
1.85  
1.65  
1.64  
1.63  
1.62  
1.61  
1.61  
1.59  
1.58  
1.56  
1.55  
1.55  
1.54  
1.54  
1.52  
1.52  
1.51  
1.51  
1.50  
1.49  
1.47  
0.93

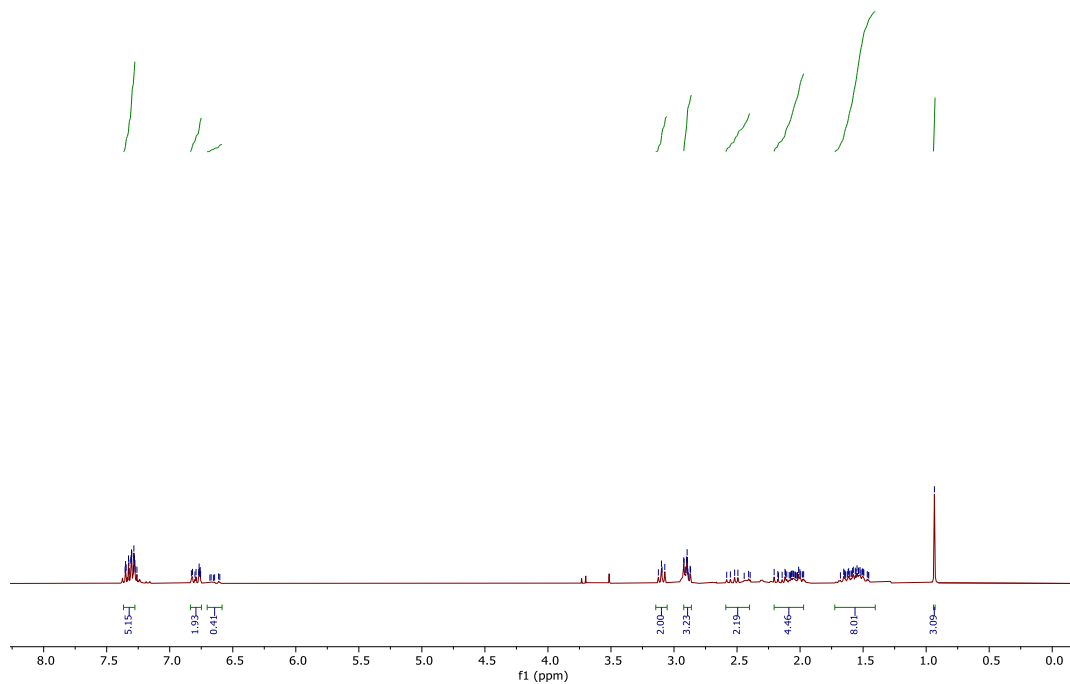

— 220.90  
— 171.74  
— 148.54  
140.19  
138.00  
137.38  
136.60  
128.45  
126.45  
126.40  
121.56  
118.73  
77.48 CDCl3  
77.05 CDCl3  
76.63 CDCl3  
50.44  
47.98  
44.16  
38.01  
35.88  
31.56  
31.02  
26.35  
25.76  
21.61  
13.85

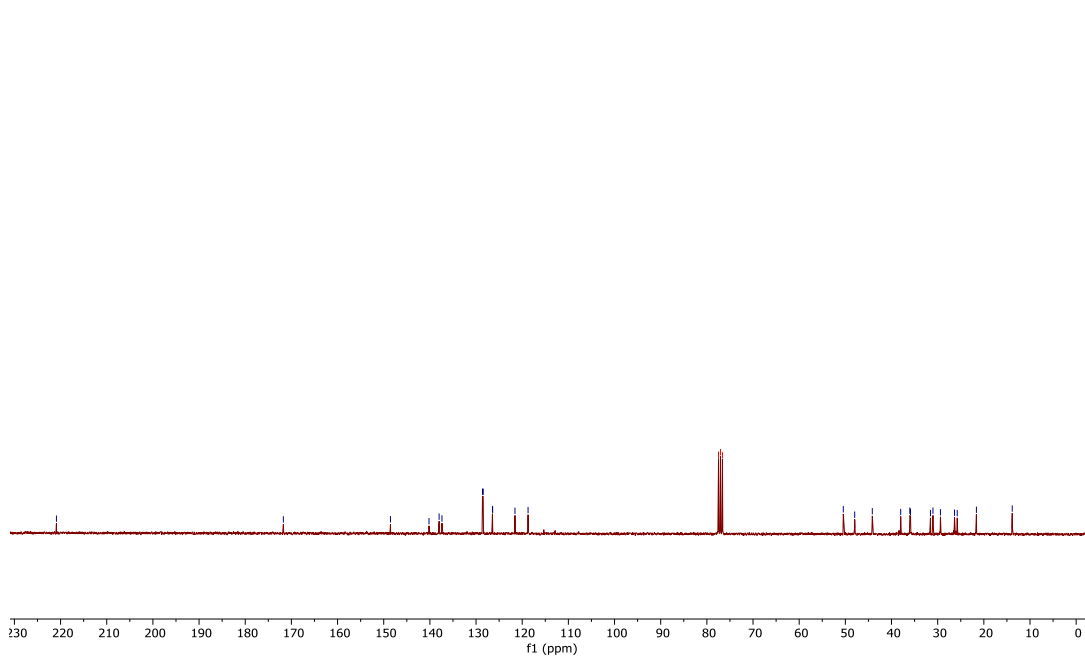

Citronellyl acetate (77)

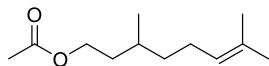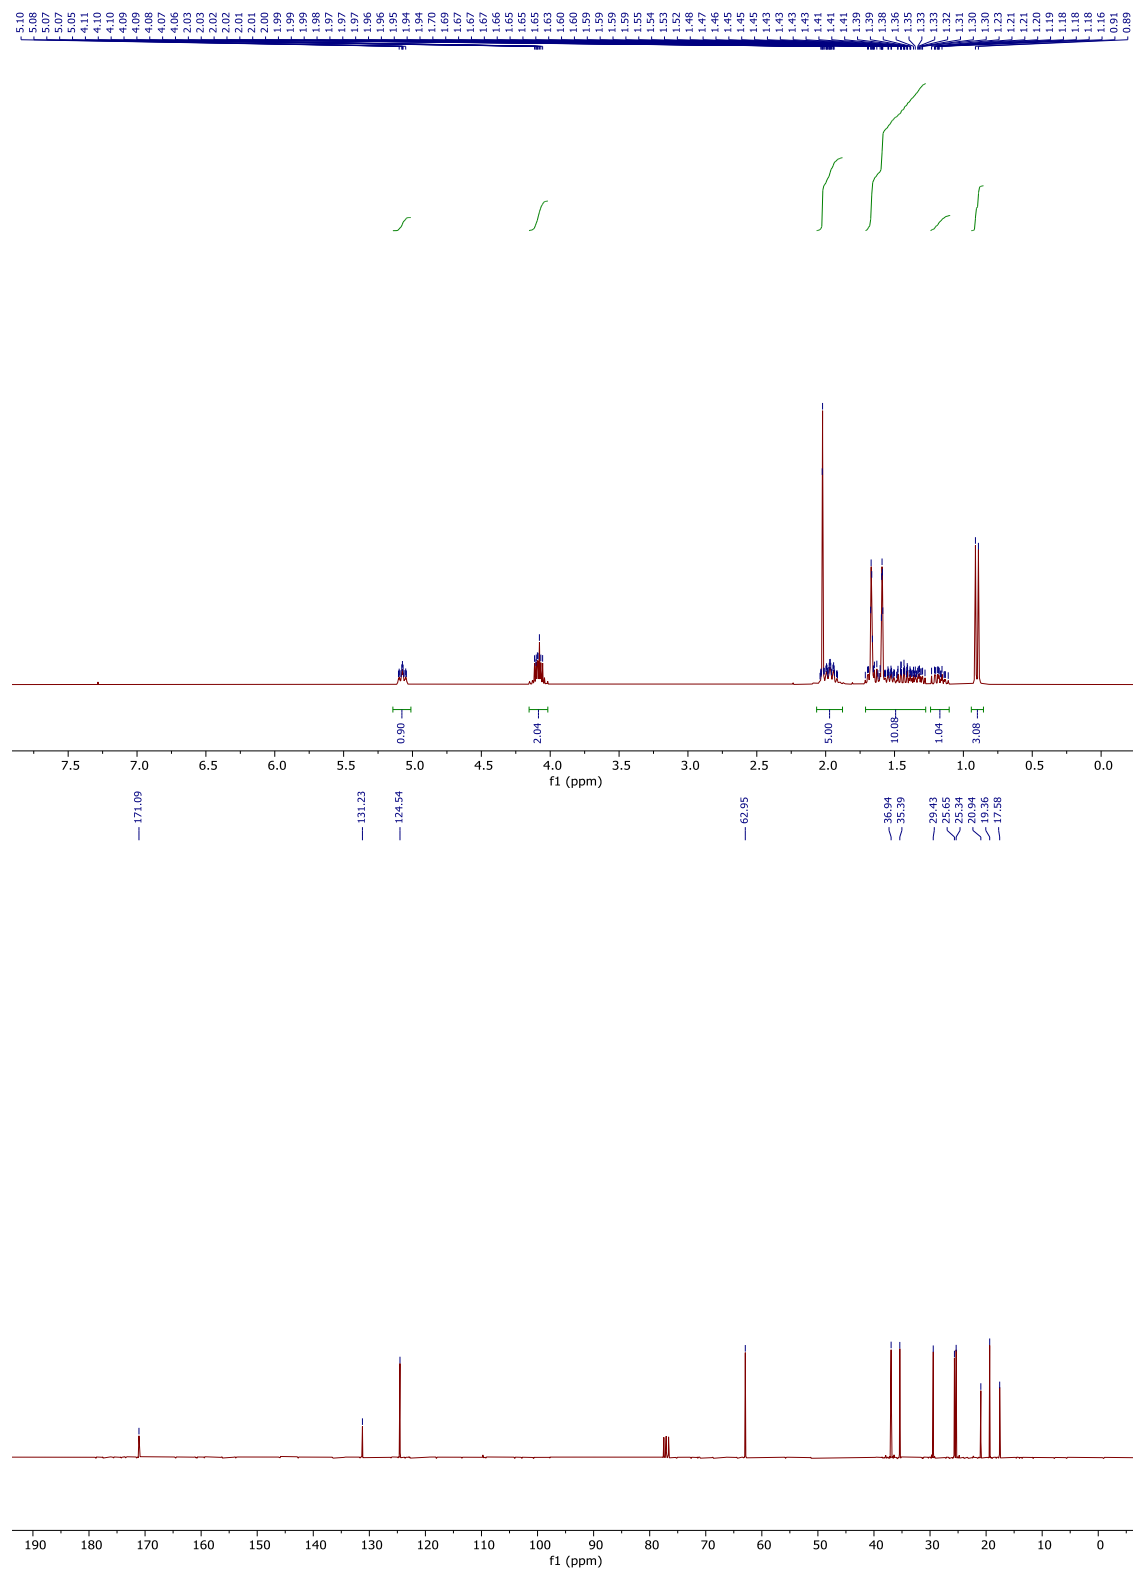

(3S,8S,9S,10R,13R,14S,17R)-10,13-Dimethyl-17-((R)-6-methylheptan-2-yl)-2,3,4,7,8,9,10,11,12,13,14,15,16,17-tetradecahydro-1H-cyclopenta[a]phenanthren-3-yl 3-phenylpropanoate (**78**)

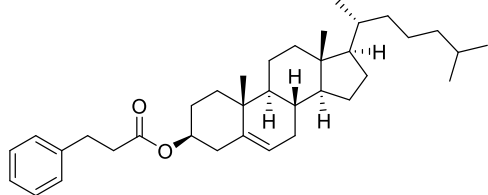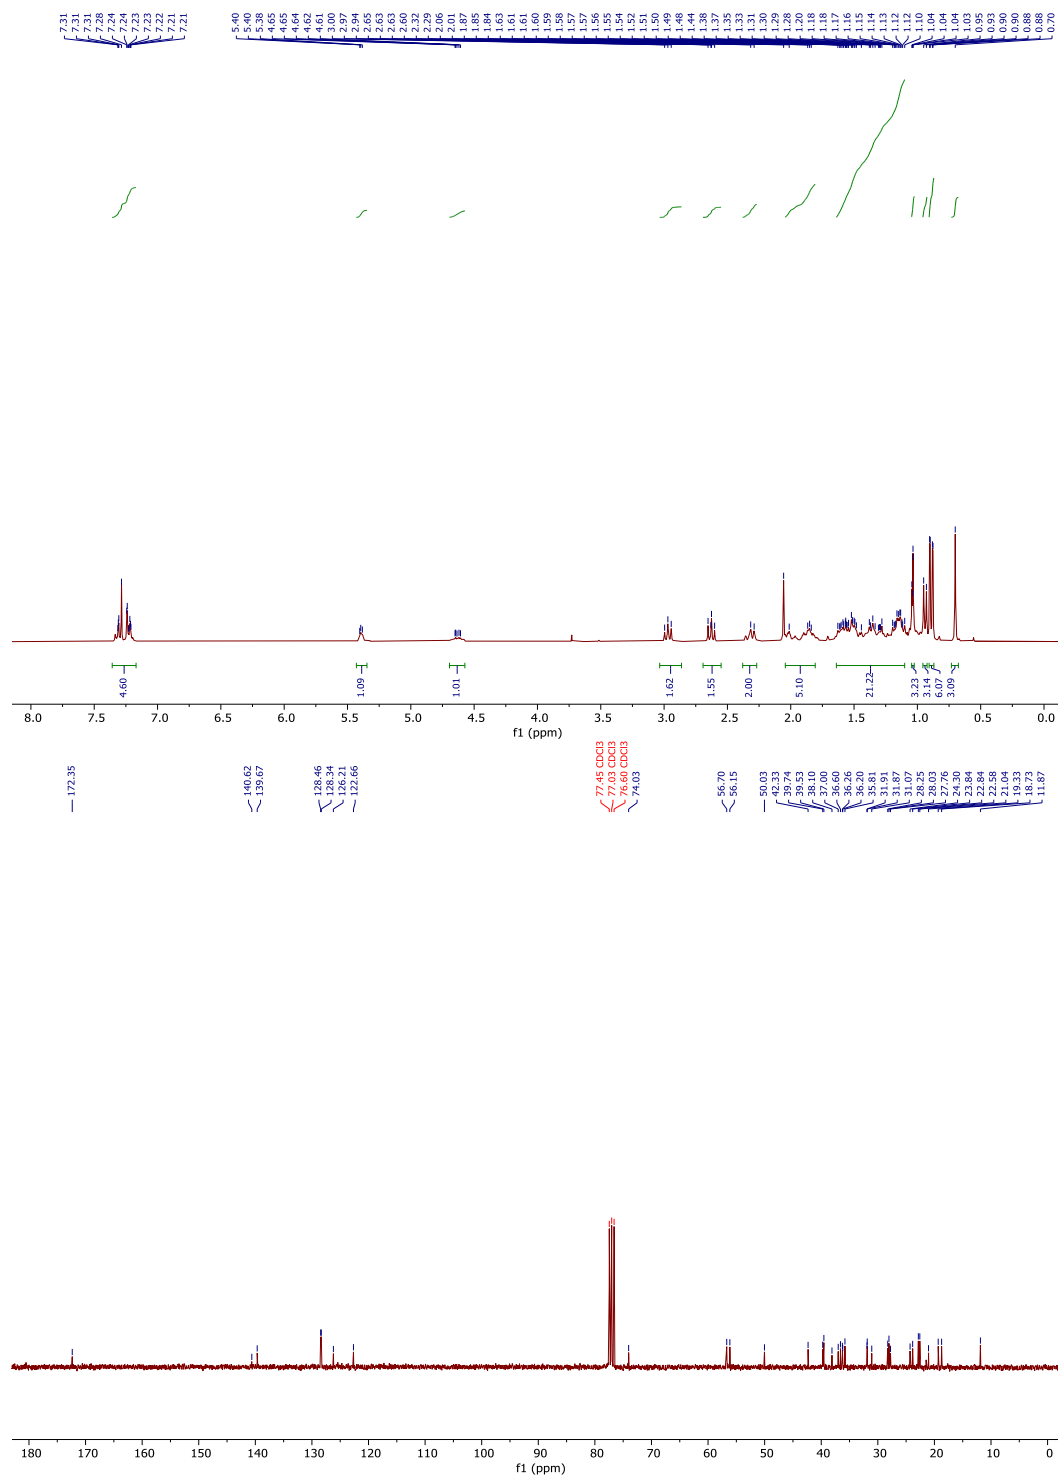

(3S,5S,8R,9S,10S,13R,14S,17R)-10,13-Dimethyl-17-((R)-6-methylheptan-2-yl)hexadecahydro-1H-cyclopenta[a]phenanthren-3-yl 3-phenylpropanoate (**79**)

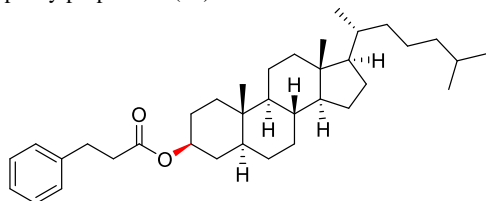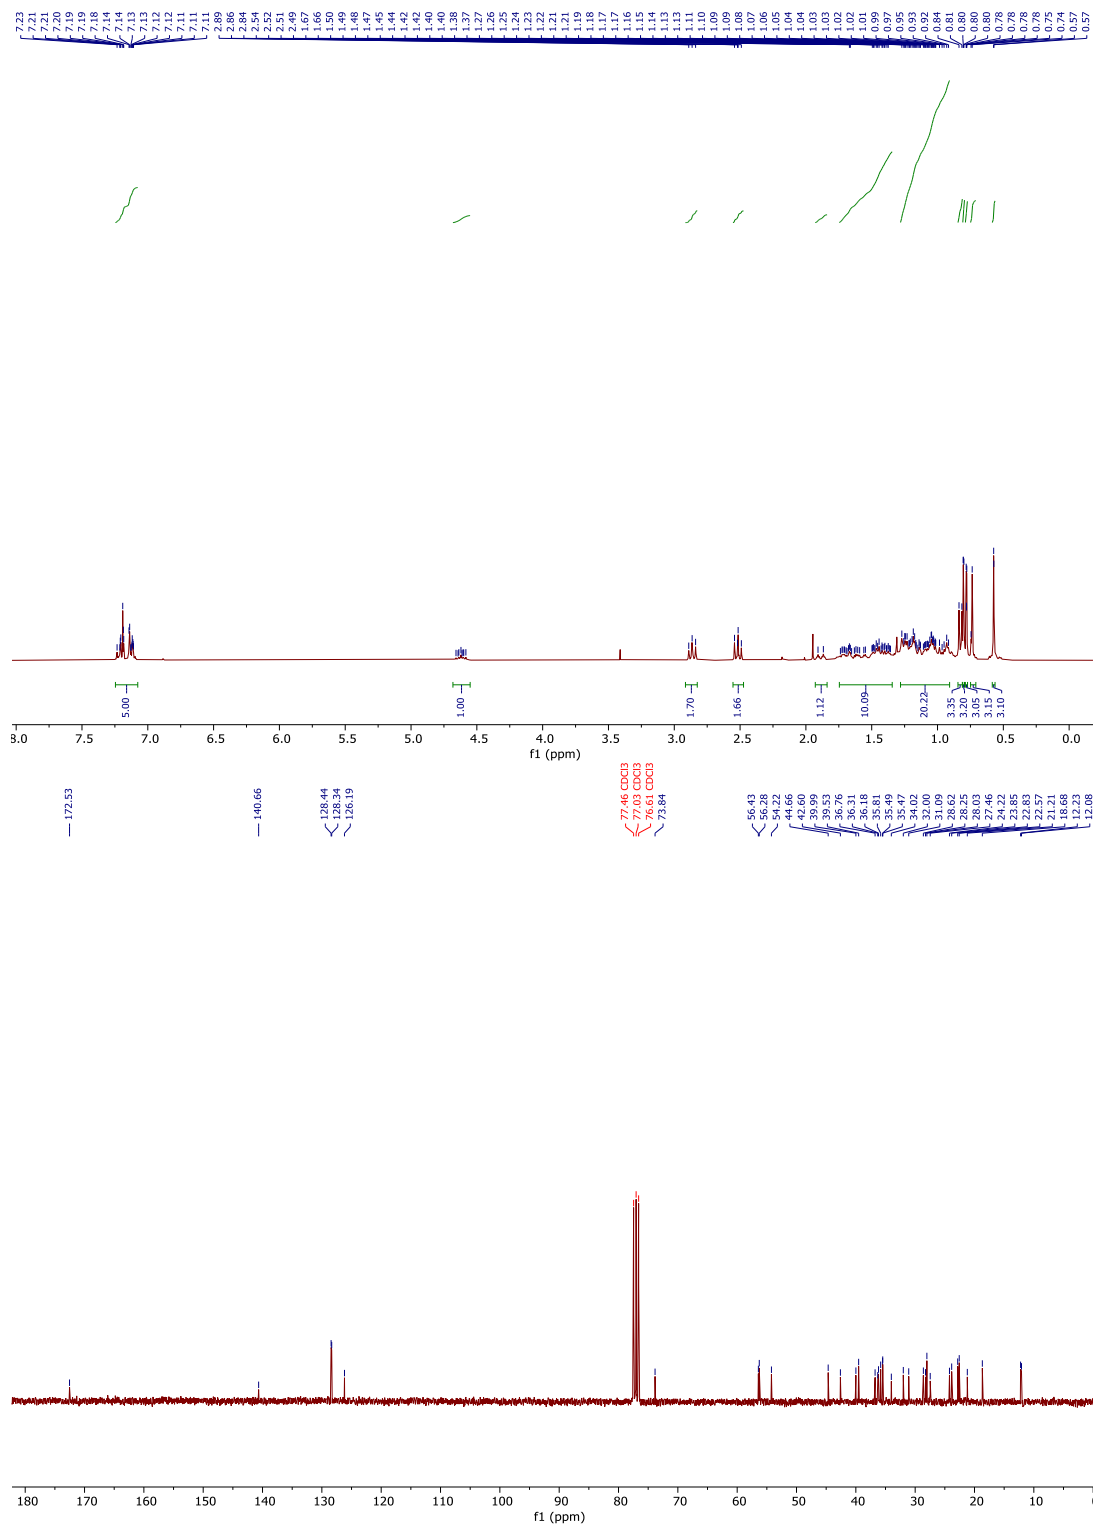

(3S,8S,9S,10R,13R,14S,17R)-10,13-Dimethyl-17-((R)-6-methylheptan-2-yl)-2,3,4,7,8,9,10,11,12,13,14,15,16,17-tetradecahydro-1H-cyclopenta[a]phenanthren-3-yl acetate (**80**)

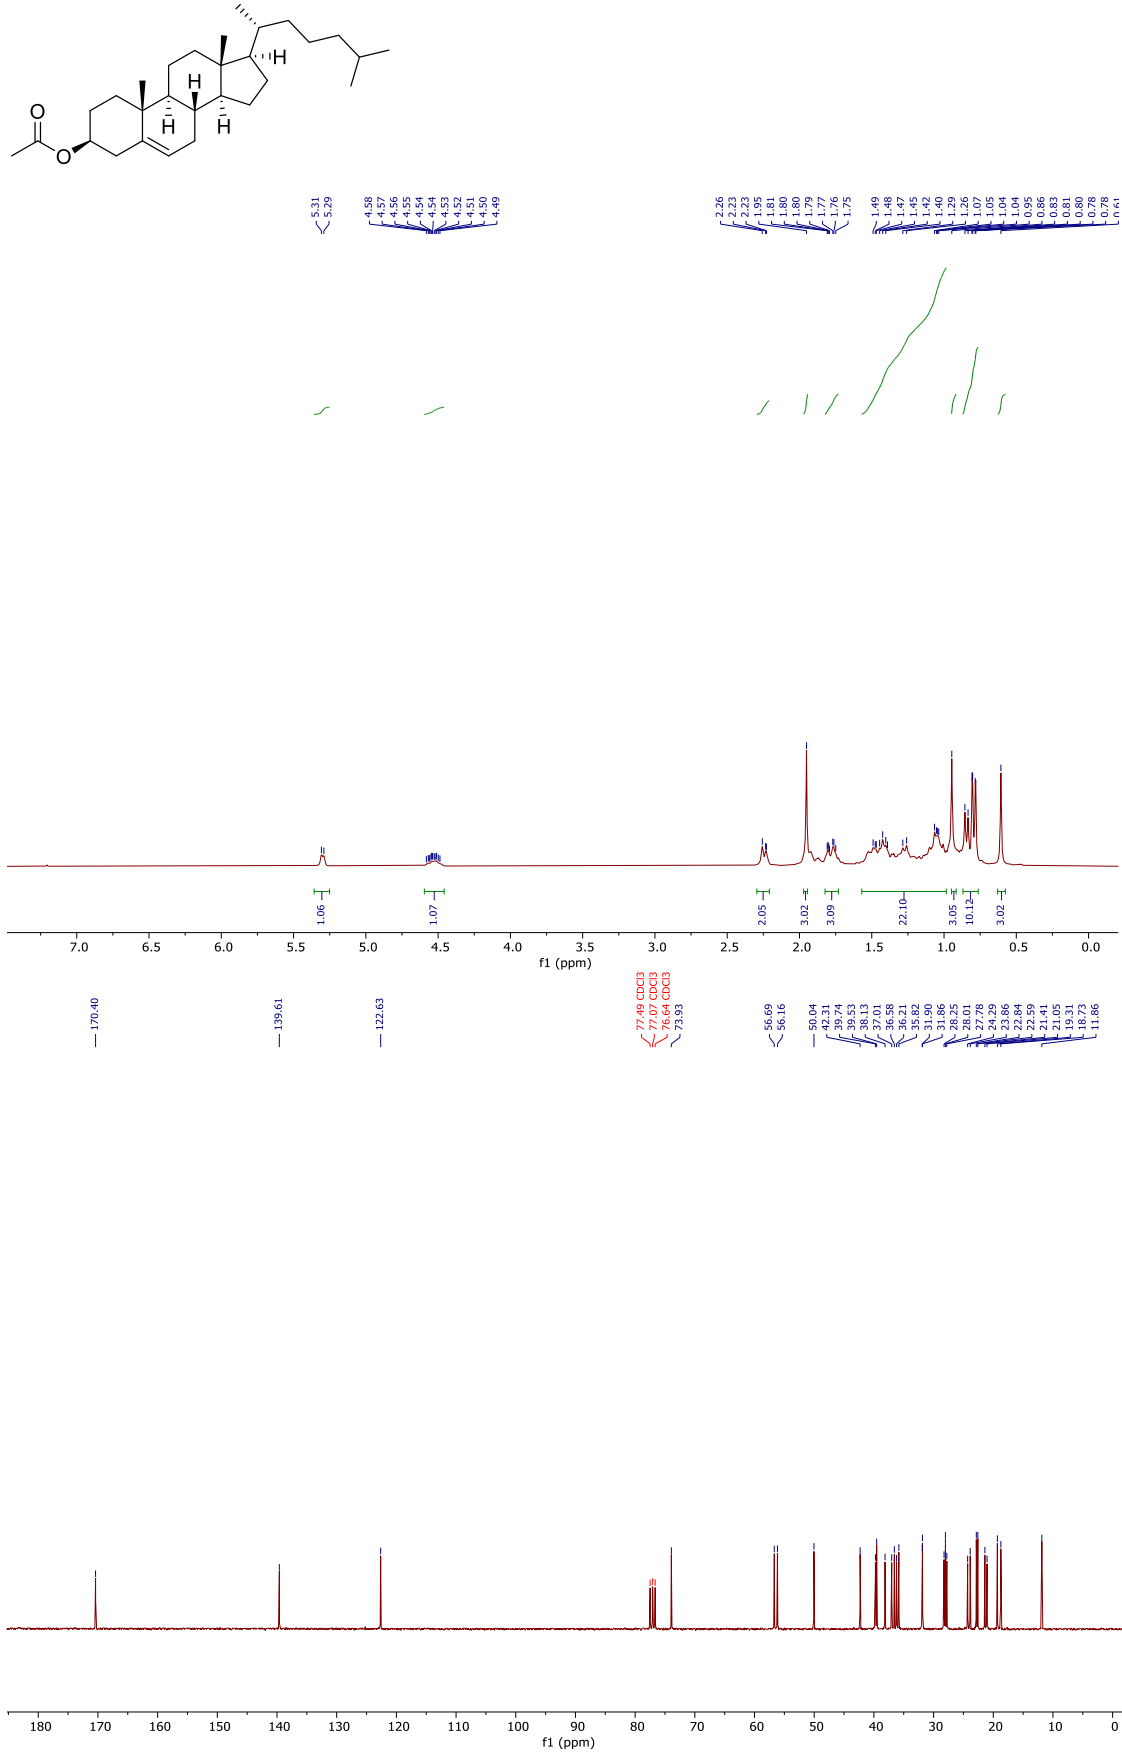



(3S,8R,9S,10R,13S,14S)-10,13-Dimethyl-17-oxo-2,3,4,7,8,9,10,11,12,13,14,15,16,17-tetradecahydro-1H-cyclopenta[a]phenanthren-3-yl acetate (**81**)

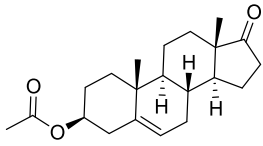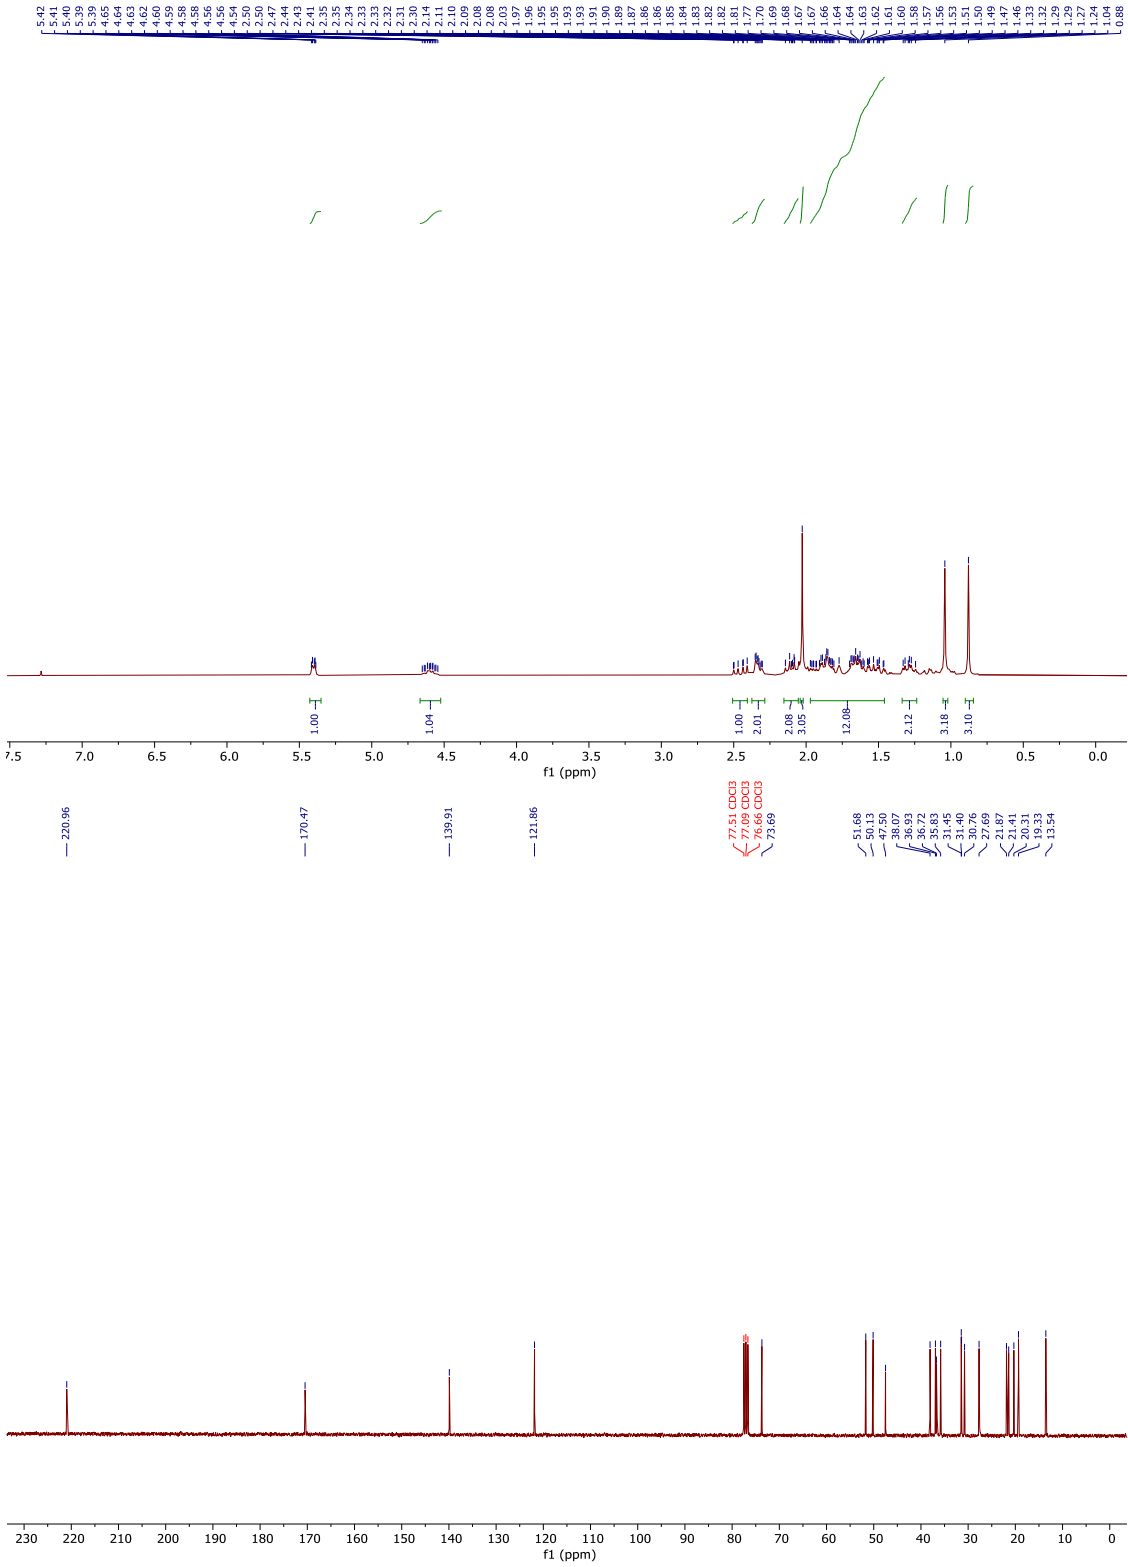

(3S,8R,9S,10R,13S,14S)-10,13-Dimethyl-17-oxo-2,3,4,7,8,9,10,11,12,13,14,15,16,17-tetradecahydro-1H-cyclopenta[a]phenanthren-3-yl 3-phenylpropanoate (**82**)

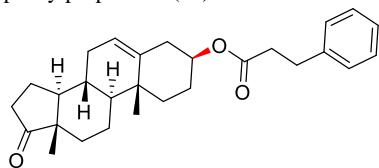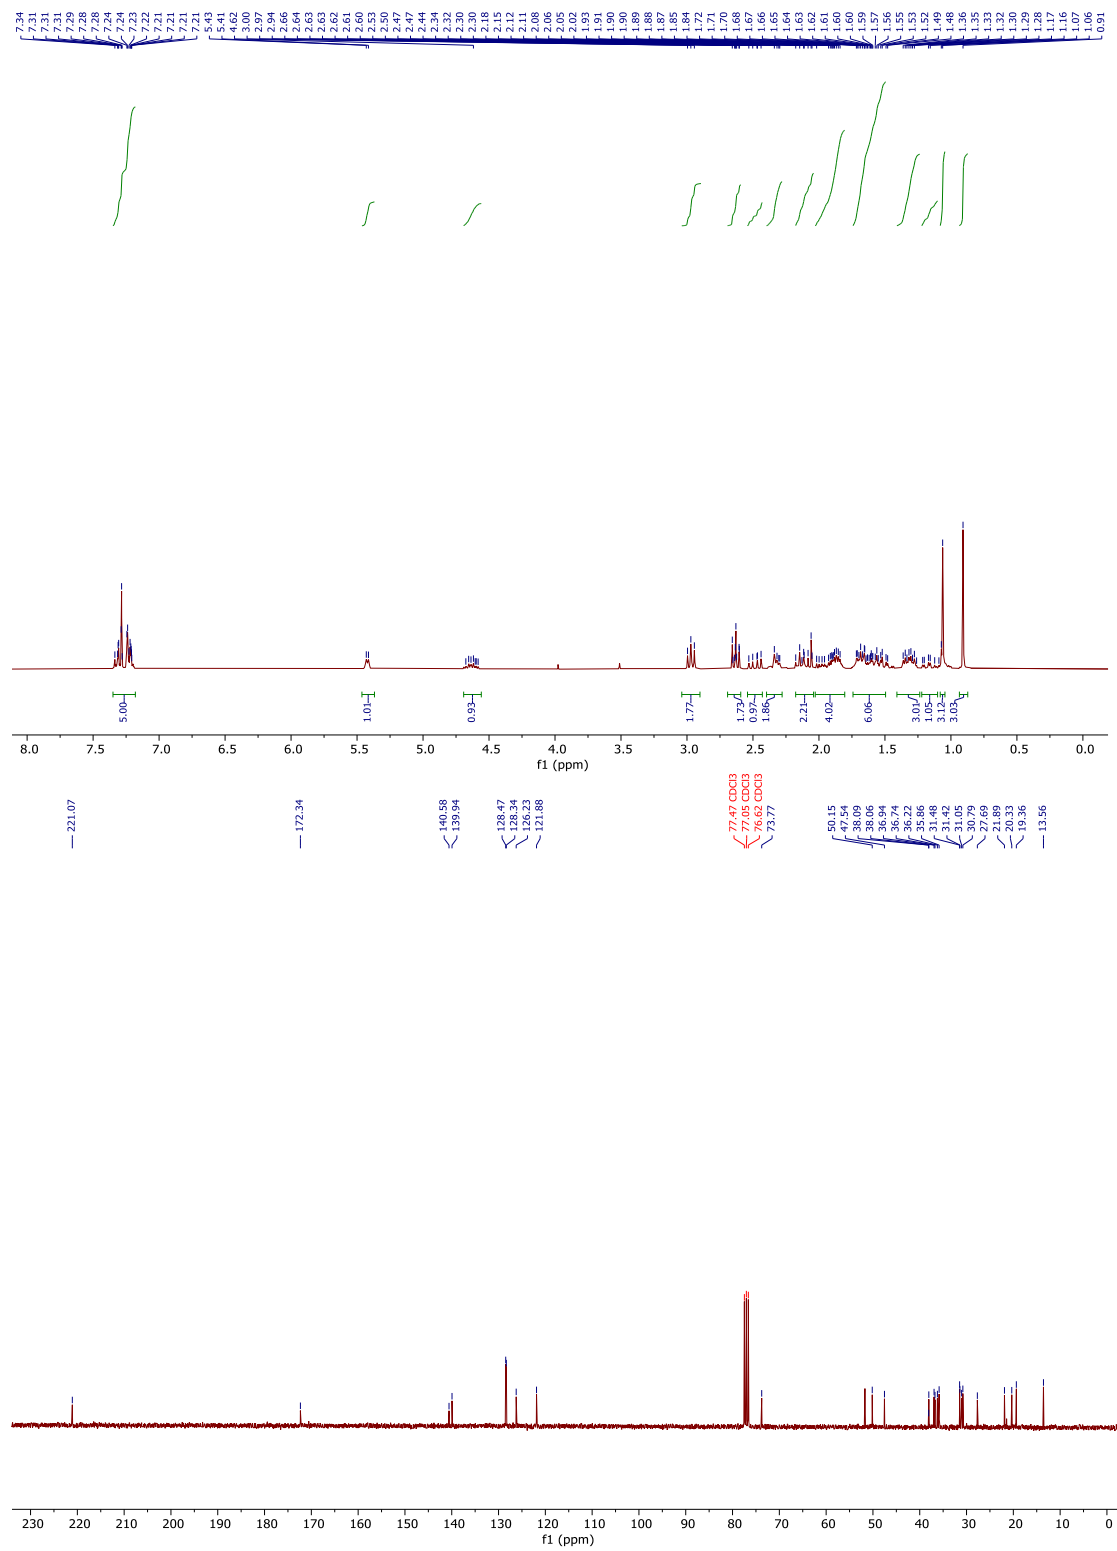

Pregnanolone acetate (83)

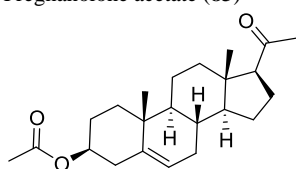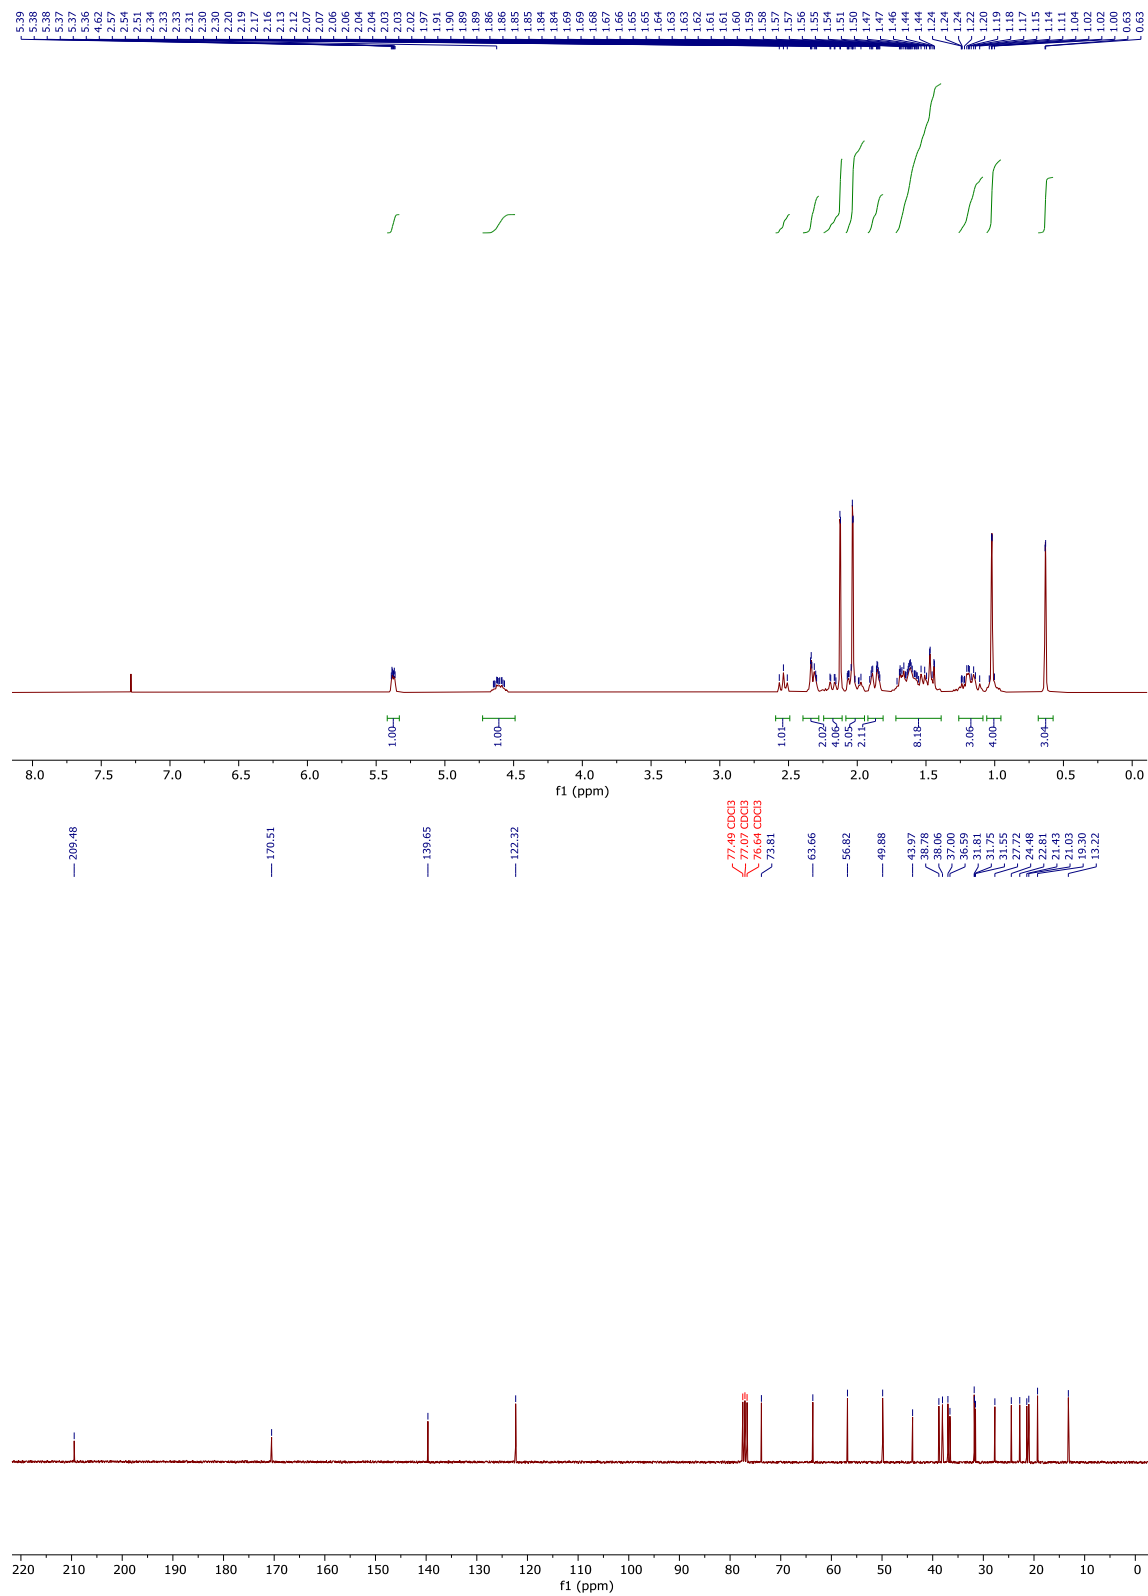

Butyl (S)-4-((2-(6-methoxynaphthalen-2-yl)propanoyl)oxy)butanoate (**84**)

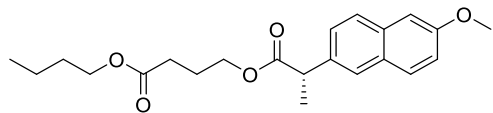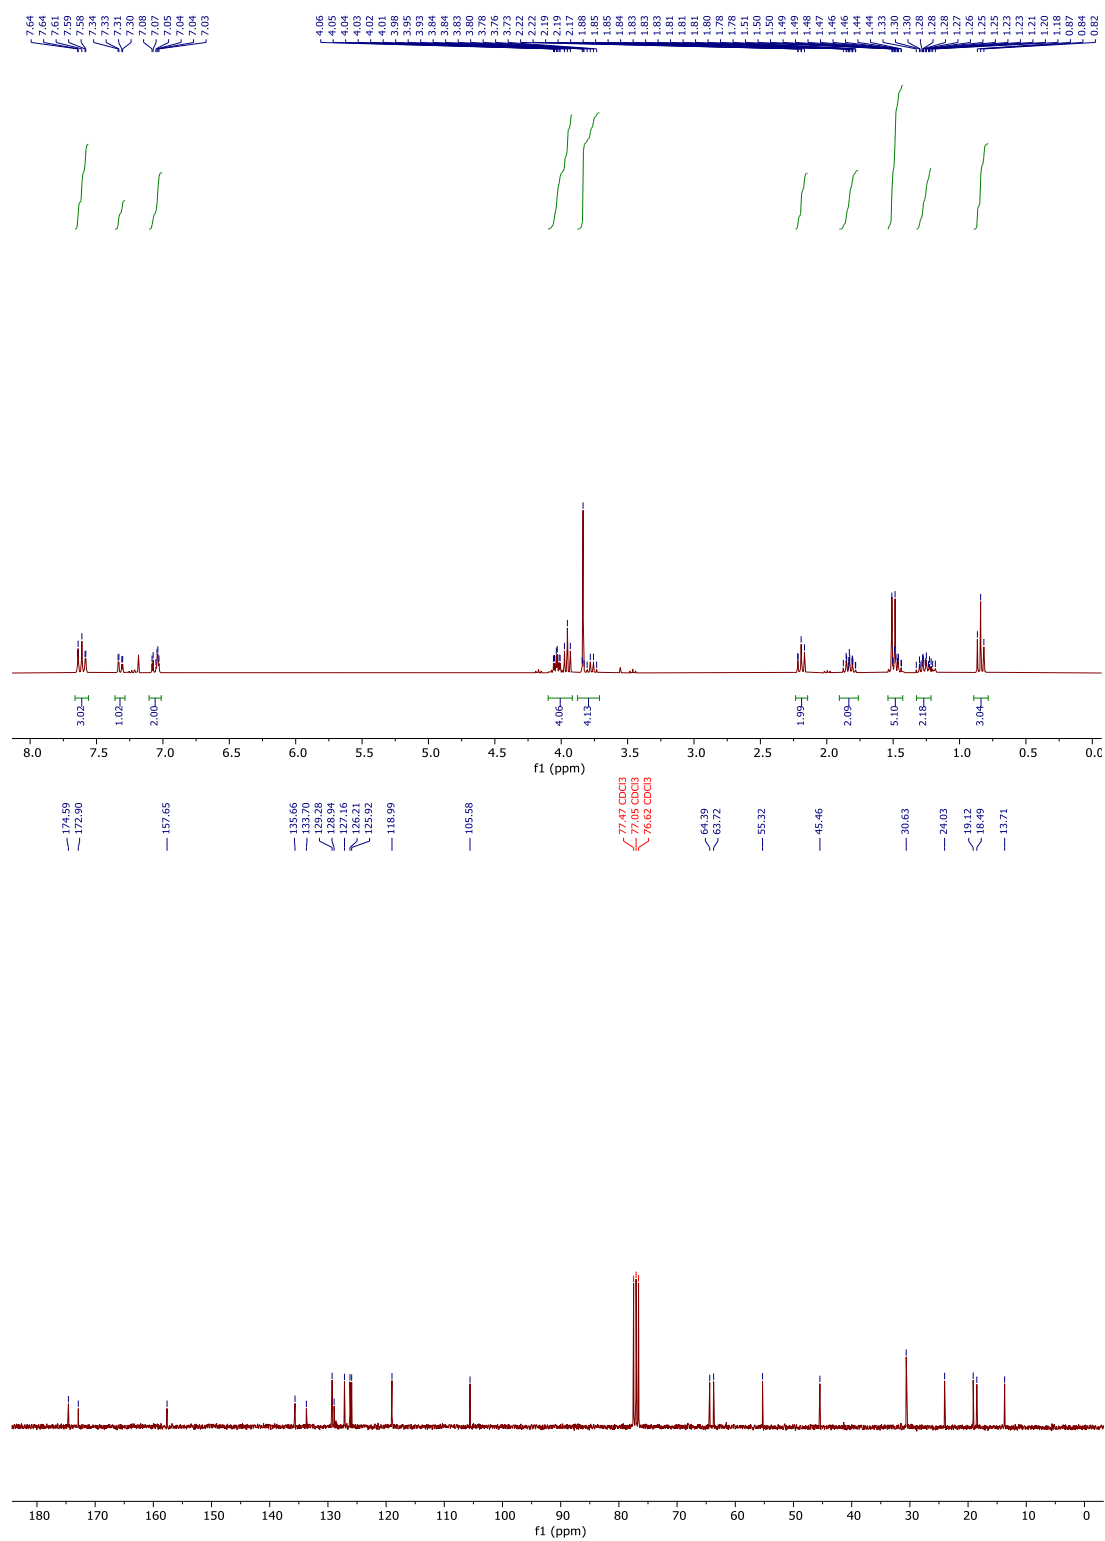

Phenyl 4-(3,7-dimethyl-2,6-dioxo-2,3,6,7-tetrahydro-1H-purin-1-yl)butanoate (**85**)

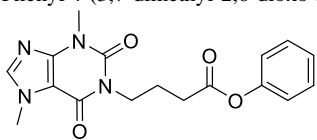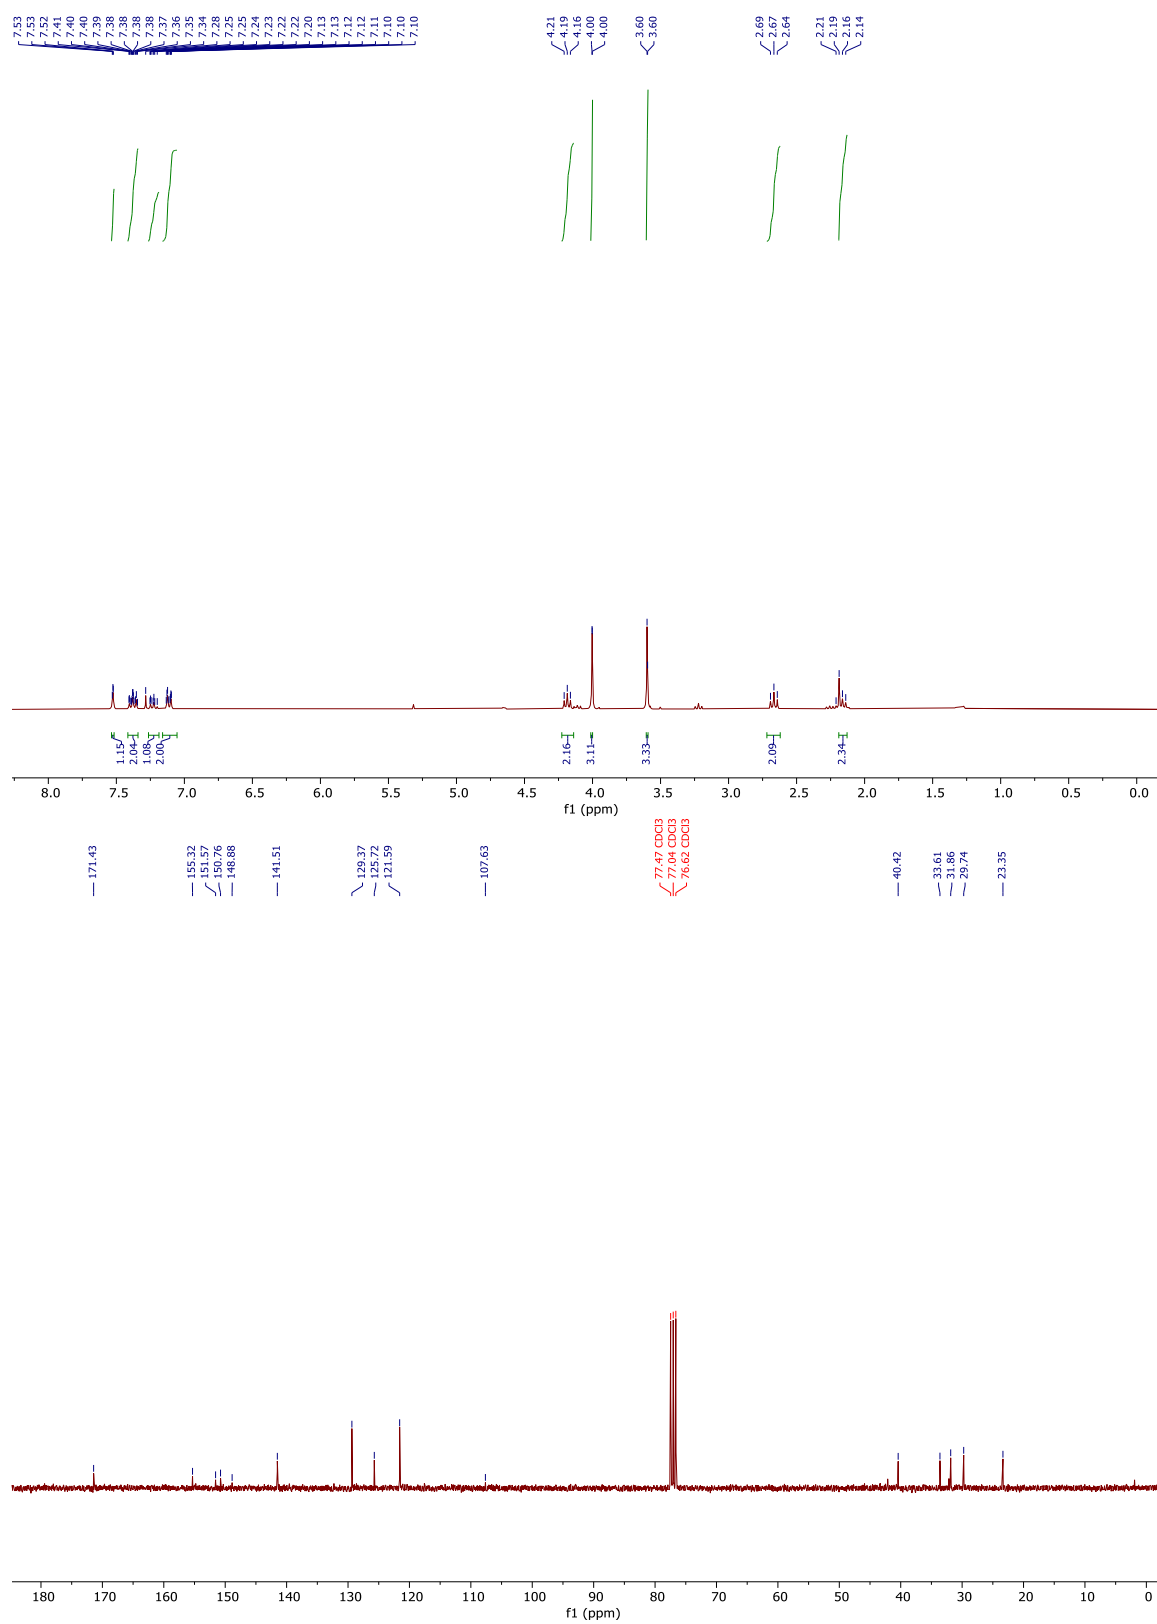

Supplement: d2sc04103k1.pdf [file d2sc04103k1.pdf]
